# Supplementary material for: Highly efficient vinylaromatics generation via iron-catalyzed sp3 C–H bond functionalization CDC reaction: a novel approach to preparing substituted benzo[α]phenazines
Source: Royal Society of Chemistry journal article supplement (doi:10.1039/c2cc36708d), 2012-01-01

# Supporting Information

## Highly Efficient Vinylaromatics Generation *via* Iron-Catalyzed $sp^3$ C-H Bond Functionalization CDC Reaction: A Novel Approach to Preparing Substituted Benzo[ $\alpha$ ]phenazines

Shao-Jie Lou, Dan-Qian Xu,\* Dan-Feng Shen, Yi-Feng Wang, Yun-Kui Liu, and Zhen-Yuan Xu\*

Catalytic Hydrogenation Research Center, State Key Laboratory Breeding Base of Green Chemistry-Synthesis Technology,  
Zhejiang University of Technology, 18 Chaowang Road, Hangzhou 310014, P. R. China

Email: [greenchem@zjut.edu.cn](mailto:greenchem@zjut.edu.cn)

| Table of Contents                                                                    | Page     |
|--------------------------------------------------------------------------------------|----------|
| General                                                                              | S2       |
| General synthesis of 2-(2-bromoaromatic)-3-methylquinoxalines ( <b>1p-1v</b> )       | S2–S5    |
| Screening the different metal catalysts and oxidants                                 | S5–S6    |
| Typical experimental procedure for the synthesis of <b>2</b> , <b>4</b> and <b>5</b> | S6       |
| Characterization of all products                                                     | S7–S17   |
| Preliminary mechanistic studys                                                       | S17–S23  |
| References                                                                           | S23      |
| $^1\text{H}$ and $^{13}\text{C}$ NMR spectra of all products                         | S24–S113 |

## General

Unless otherwise stated, all reagents were purchased from commercial suppliers and used without purifications. FeCl<sub>3</sub> (>99.99%, trace metal basis) were purchased from Sigma-Aldrich. NEt<sub>3</sub> and DMA applied in the Heck closure were dried, distilled and degassed prior to use according to standard methods. Starting materials 2-aryl-3-methylquinoxalines and 2-phenyl-3-ethylquinoxaline (**1a-o**)<sup>[1,2]</sup>, 2-methyl-3-phenoxyquinoxaline (**3b**)<sup>[3]</sup>, 2-methoxy-3-methylquinoxaline (**3c**)<sup>[4]</sup>, methyl 3-methylquinoxaline-2-carboxylate (**3d**)<sup>[5]</sup>, 2-methyl-3-phenylpyrazine (**3e**)<sup>[6]</sup>, 2-aryl-3-methylquinolines (**3g, 3h**)<sup>[7]</sup>, diethyl 2,6-dimethylpyridine-3,5-dicarboxylate (**3j**)<sup>[8]</sup>, were synthesized according to the literature procedures. Melting points are uncorrected. <sup>1</sup>H NMR and <sup>13</sup>C NMR spectra were obtained on a Bruker AVANCE III 500 instrument in CDCl<sub>3</sub> using TMS as internal standard, operating at 500 MHz and 125 MHz, respectively. Chemical shifts ( $\delta$ ) are expressed in ppm and coupling constants ( $J$ ) are given in Hz. GC-MS experiments were performed with an Agilent 6890N GC system equipped with a 5973N mass-selective detector. High resolution mass spectra (HRMS) of starting materials and products were obtained on a Water GCT Premier TOF MS with EI source. Electrospray ionization (ESI) mass experiments were performed on a Thermo LCQ fleet. High resolution mass spectra (HRMS) of CDC intermediate **9** was obtained on a Agilent 6210 TOF LC/MS with ESI source.

## General synthesis of 2-(2-bromoaromatic)-3-methylquinoxalines (**1p-1v**)

O-methyl oximes **I** were synthesized according to the literature procedures<sup>[9]</sup>. Then, **I** (5.0 mmol) were combined with NBS (5.5 mmol, 1.1 equiv.), Pd(OAc)<sub>2</sub> (0.25 mmol, 5 mol%) and AcOH (30 mL), the mixture was heated at 100 °C for 12 h (monitored by TLC) to give **II** according to previous report by Sanford<sup>[10]</sup>. **II** underwent deprotection and  $\alpha$ -bromination using general procedures. Finally, **III** were treated with *o*-PDA (*o*-phenylenediamine) as the preparation of substrates (**1a-1o**) to gain the desired **1p-1v**.

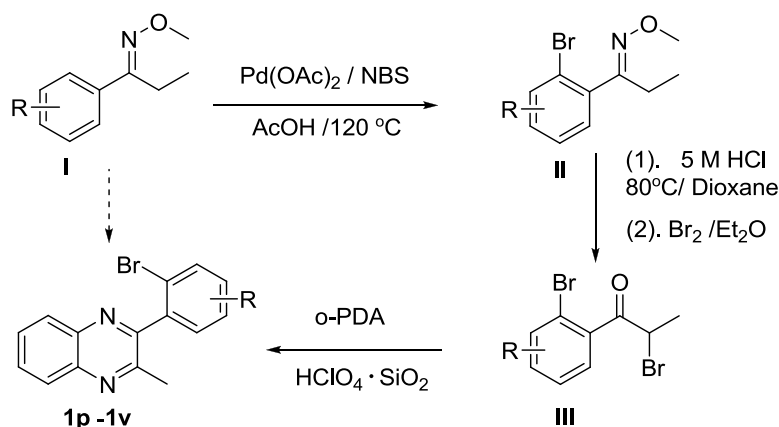

Figure 1. synthesis of substrates

## Characterization of some new reaction substrates

### 2-(2-bromophenyl)-3-methylquinoxaline (1j)

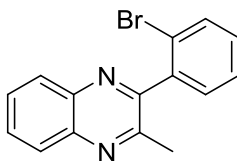

White solid;  $R_f$  = 0.37 (petroleum ether-EtOAc = 6:1); mp 87-88°C;  $^1\text{H}$  NMR (500 MHz,  $\text{CDCl}_3$ ):  $\delta$  = 8.14-8.10 (m, 2H), 7.82-7.73 (m, 3H), 7.52-7.49 (m, 1H), 7.43-7.36 (m, 2H), 2.62 (s, 3H) ppm;  $^{13}\text{C}$  NMR (125 MHz,  $\text{CDCl}_3$ ):  $\delta$  = 154.7, 153.0, 141.7, 140.6, 140.0, 132.9, 130.4, 130.2, 130.1, 129.3, 128.5, 127.9, 122.4, 23.1 ppm; MS (EI, 70eV):  $m/z$  (%) = 298 (60)  $[\text{M}^+]$ , 219 (100); HRMS (EI) for  $\text{C}_{15}\text{H}_{11}\text{N}_2\text{Br}$ : calcd. 298.0106, found 298.0099.

### 2-(2-bromo-4-methylphenyl)-3-methylquinoxaline (1p)

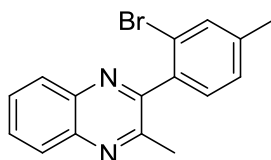

White solid;  $R_f$  = 0.38 (petroleum ether-EtOAc = 6:1); mp 83-84°C;  $^1\text{H}$  NMR (500 MHz,  $\text{CDCl}_3$ ):  $\delta$  = 8.13-8.10 (m, 2H), 7.81-7.73 (m, 2H), 7.56 (s, 1H), 7.30 (s, 2H), 2.63 (s, 3H), 2.45 (s, 3H) ppm;  $^{13}\text{C}$  NMR (125 MHz,  $\text{CDCl}_3$ ):  $\delta$  = 154.8, 153.2, 141.6, 140.8, 140.7, 137.1, 133.3, 130.0, 129.9, 129.3, 129.2, 128.6, 128.4, 122.1, 23.1, 21.0 ppm; MS (EI, 70eV):  $m/z$  (%) = 312 (52)  $[\text{M}^+]$ , 233 (100); HRMS (EI) for  $\text{C}_{16}\text{H}_{13}\text{N}_2\text{Br}$ : calcd. 312.0262, found 312.0282.

### 2-(2-bromo-4-methoxyphenyl)-3-methylquinoxaline (1q)

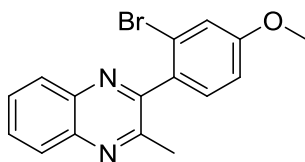

Pale yellow solid;  $R_f$  = 0.21 (petroleum ether-EtOAc = 6:1); mp 88-89°C;  $^1\text{H}$  NMR (500 MHz,  $\text{CDCl}_3$ ):  $\delta$  = 8.13-8.10 (m, 2H), 7.80-7.73 (m, 2H), 7.33 (d,  $J$  = 8.5 Hz, 1H), 7.27 (d,  $J$  = 2.5 Hz, 1H), 7.03 (dd,  $J_1$  = 8.5 Hz,  $J_2$  = 2.5 Hz, 1H), 3.89 (s, 3H), 2.63 (s, 3H) ppm;  $^{13}\text{C}$  NMR (125 MHz,  $\text{CDCl}_3$ ):  $\delta$  = 160.6, 154.6, 153.5, 141.6, 140.7, 132.3, 130.8, 130.0, 129.3, 129.2, 128.4, 122.8, 118.1, 114.0, 55.7, 23.2 ppm; MS (EI, 70eV):  $m/z$  (%) = 328 (100)  $[\text{M}^+]$ , 249 (83); HRMS (EI) for  $\text{C}_{16}\text{H}_{13}\text{N}_2\text{OBr}$ : calcd. 328.0211, found 328.0211.

### 2-(2-bromo-4-fluorophenyl)-3-methylquinoxaline (1r)

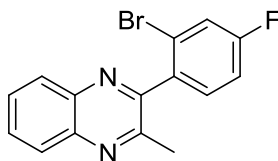

White solid;  $R_f$  = 0.34 (petroleum ether-EtOAc = 6:1); mp 103-104°C;  $^1\text{H}$  NMR (500 MHz,  $\text{CDCl}_3$ ):  $\delta$  = 8.13-8.10 (m, 2H), 7.83-7.75 (m, 2H), 7.49 (dd,  $J_1$  = 8.3 Hz,  $J_2$  = 2.3 Hz, 1H), 7.42 (dd,  $J_1$  = 8.5 Hz,  $J_2$  = 5.5 Hz, 1H), 7.23 (td,  $J_1$  = 8.3 Hz,  $J_2$  =

2.5 Hz, 1H), 2.62 (s, 3H) ppm;  $^{13}\text{C}$  NMR (125 MHz,  $\text{CDCl}_3$ ):  $\delta$  = 162.6 (d,  $J$  = 251.5 Hz), 153.8, 152.9, 141.7, 140.6, 136.2, 131.3 (d,  $J$  = 8.5 Hz), 130.3, 129.4, 129.2, 128.4, 122.8 (d,  $J$  = 9.9 Hz), 120.3 (d,  $J$  = 24.4 Hz), 115.3 (d,  $J$  = 21.1 Hz), 23.1 ppm; MS (EI, 70eV):  $m/z$  (%) = 316 (77) [ $\text{M}^+$ ], 237 (100); HRMS (EI) for  $\text{C}_{15}\text{H}_{10}\text{N}_2\text{BrF}$ : calcd. 316.0011, found 315.9993.

### 2-(3-bromobiphenyl-4-yl)-3-methylquinoxaline (1s)

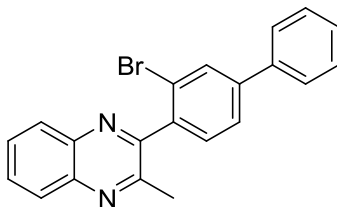

White solid;  $R_f$  = 0.32 (petroleum ether-EtOAc = 6:1); mp 134-135°C;  $^1\text{H}$  NMR (500 MHz,  $\text{CDCl}_3$ ):  $\delta$  = 8.16-8.12 (m, 2H), 7.97 (d,  $J$  = 1.0 Hz, 1H), 7.83-7.71 (m, 3H), 7.65 (d,  $J$  = 7.5 Hz, 2H), 7.53-7.49 (m, 3H), 7.36 (t,  $J$  = 7.5 Hz, 1H), 2.69 (s, 3H) ppm;  $^{13}\text{C}$  NMR (125 MHz,  $\text{CDCl}_3$ ):  $\delta$  = 154.6, 153.1, 143.8, 141.8, 140.7, 139.1, 138.7, 131.5, 130.5, 130.2, 129.3, 129.0, 128.5, 128.2, 127.2, 126.6, 122.8, 22.3 ppm; MS (EI, 70eV):  $m/z$  (%) = 374 (52) [ $\text{M}^+$ ], 295 (100); HRMS (EI) for  $\text{C}_{21}\text{H}_{15}\text{N}_2\text{Br}$ : calcd. 374.0419, found 374.0438.

### 2-(3-bromonaphthalen-2-yl)-3-methylquinoxaline (1t)

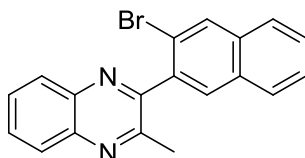

White solid;  $R_f$  = 0.36 (petroleum ether-EtOAc = 6:1); mp 144-145°C;  $^1\text{H}$  NMR (500 MHz,  $\text{CDCl}_3$ ):  $\delta$  = 8.26 (s, 1H), 8.15 (td,  $J_1$  = 8.2 Hz,  $J_2$  = 1.0 Hz, 2H), 7.93 (s, 1H), 7.89-7.86 (m, 2H), 7.84-7.76 (m, 2H), 7.62-7.57 (m, 2H), 2.65 (s, 3H) ppm;  $^{13}\text{C}$  NMR (125 MHz,  $\text{CDCl}_3$ ):  $\delta$  = 154.7, 153.3, 141.8, 140.6, 137.4, 134.4, 132.2, 131.6, 130.1, 129.6, 129.3, 139.3, 128.5, 128.1, 127.6, 127.0, 136.9, 119.4, 23.3 ppm; MS (EI, 70eV):  $m/z$  (%) = 348 (27) [ $\text{M}^+$ ], 269 (100); HRMS (EI) for  $\text{C}_{19}\text{H}_{13}\text{N}_2\text{Br}$ : calcd. 348.0262, found 348.0259.

### 2-(2-bromo-5-chlorophenyl)-3-methylquinoxaline (1u)

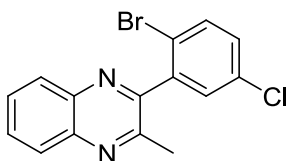

White solid;  $R_f$  = 0.47 (petroleum ether-EtOAc = 6:1); mp 122-123°C;  $^1\text{H}$  NMR (500 MHz,  $\text{CDCl}_3$ ):  $\delta$  = 8.13-8.10 (m, 2H), 7.83-7.75 (m, 2H), 7.66 (d,  $J$  = 8.5 Hz, 1H), 7.43 (d,  $J$  = 2.5 Hz, 1H), 7.36 (dd,  $J_1$  = 8.5 Hz,  $J_2$  = 2.5 Hz, 1H), 2.64 (s, 3H) ppm;  $^{13}\text{C}$  NMR (125 MHz,  $\text{CDCl}_3$ ):  $\delta$  = 153.3, 152.6, 141.9, 141.5, 140.5, 134.1, 134.0, 130.5, 130.4, 130.3, 129.5, 129.3, 128.5, 120.4, 23.0 ppm; MS (EI, 70eV):  $m/z$  (%) = 332 (48) [ $\text{M}^+$ ], 253 (100); HRMS (EI) for  $\text{C}_{15}\text{H}_{10}\text{N}_2\text{ClBr}$ : calcd. 331.9716, found 331.9712.

### 2-(2-bromophenyl)-3,6,7-trimethylquinoxaline (1v)

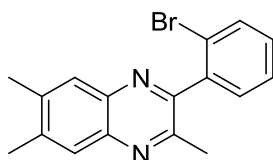

Yellow solid;  $R_f$ =0.35 (petroleum ether-EtOAc= 6:1); mp 119-120°C;  $^1\text{H}$  NMR (500 MHz,  $\text{CDCl}_3$ ):  $\delta$  = 7.86 (d,  $J$  = 7.5 Hz, 2H), 7.26-7.10 (m, 1H), 7.48 (td,  $J_1$  = 7.6 Hz,  $J_2$  = 0.9 Hz, 1H), 7.41 (dd,  $J_1$  = 7.6 Hz,  $J_2$  = 1.7 Hz, 1H), 7.36 (dd,  $J_1$  = 7.8 Hz,  $J_2$  = 1.7 Hz, 1H), 2.58 (s, 3H), 2.53 (s, 3H), 2.50 (s, 3H) ppm;  $^{13}\text{C}$  NMR (125 MHz,  $\text{CDCl}_3$ ):  $\delta$  = 153.7, 151.8, 140.7, 140.6, 140.3, 139.7, 139.5, 132.8, 130.2, 130.2, 128.3, 127.8, 127.5, 122.6, 23.0, 20.4, 20.3 ppm; MS (EI, 70eV):  $m/z$  (%) = 326 (100)  $[\text{M}^+]$ , 247 (64); HRMS (EI) for  $\text{C}_{17}\text{H}_{15}\text{N}_2\text{Br}$ : calcd. 326.0419, found 326.0421.

## Screening the different iron catalysts and oxidants

**Table1.** Screening of iron catalysts <sup>a</sup>

| Entry | [Fe]                                      | T (°C) | Time (hr) | Yield (%) <sup>b</sup> |
|-------|-------------------------------------------|--------|-----------|------------------------|
| 1     | $\text{FeCl}_3$                           | r.t.   | 24        | 0 <sup>c</sup>         |
| 2     | $\text{FeCl}_3$                           | 60     | 24        | 27 <sup>c</sup>        |
| 3     | $\text{FeCl}_3$                           | 110    | 3         | 94                     |
| 4     | $\text{FeCl}_3 \cdot 6\text{H}_2\text{O}$ | 110    | 3         | 94                     |
| 5     | $\text{FeCl}_2 \cdot 4\text{H}_2\text{O}$ | 110    | 3         | 91                     |
| 6     | $\text{FeSO}_4 \cdot 7\text{H}_2\text{O}$ | 110    | 3         | 91                     |
| 7     | Fe Powder                                 | 110    | 3         | 35                     |
| 8     | $\text{Fe}_2\text{O}_3$                   | 110    | 3         | 28                     |
| 9     | $\text{Fe}(\text{acac})_3$                | 110    | 3         | 12                     |
| 10    | >99.99%, $\text{FeCl}_3$                  | 110    | 3         | 94                     |
| 11    | —                                         | 110    | 3         | 4                      |

<sup>a</sup> Reaction condition : **1a** (0.2 mmol), [Fe] (0.004 mmol),  $\text{K}_2\text{S}_2\text{O}_8$  (0.4 mmol), DMA (1.5 mL), 110 °C,  $\text{Fe}(\text{acac})_3$  = Ferric acetylacetonate. <sup>b</sup> GC-MS yield. <sup>c</sup> 10 mol %  $\text{FeCl}_3$  was used, DMF served as solvent.

**Table2.** Screening of other metal catalysts <sup>a</sup>

| Entry | [M]                                       | T (°C) | Time (hr) | Yield (%) <sup>b</sup> |
|-------|-------------------------------------------|--------|-----------|------------------------|
| 1     | $\text{CuCl}_2 \cdot 2\text{H}_2\text{O}$ | 110    | 3         | 83                     |
| 2     | $\text{PdCl}_2$                           | 110    | 3         | 24                     |
| 3     | $\text{AuCl}_3$                           | 110    | 3         | 33                     |
| 4     | $\text{AlCl}_3$                           | 110    | 3         | 28                     |

<sup>a</sup> Reaction condition : **1a** (0.2 mmol), [M] (0.004 mmol),  $\text{K}_2\text{S}_2\text{O}_8$  (0.4 mmol), DMA (1.5 mL), 110 °C. <sup>b</sup> GC-MS yield.

**Table 3.** Screening of oxidants <sup>a</sup>

Reaction scheme: **1a**  $\xrightarrow[\text{DMA}]{\text{FeCl}_3 \cdot 6\text{H}_2\text{O} / \text{Oxidants}}$  **2a**

| Entry | Oxidants                                                                  | Time (hr) | Yield (%) <sup>b</sup> |
|-------|---------------------------------------------------------------------------|-----------|------------------------|
| 1     | K <sub>2</sub> S <sub>2</sub> O <sub>8</sub> (1.0 equiv)                  | 8         | 88                     |
| 2     | K <sub>2</sub> S <sub>2</sub> O <sub>8</sub> (2.0 equiv)                  | 3         | 94                     |
| 3     | Na <sub>2</sub> S <sub>2</sub> O <sub>8</sub> (2.0 equiv)                 | 3         | 8                      |
| 4     | (NH <sub>4</sub> ) <sub>2</sub> S <sub>2</sub> O <sub>8</sub> (2.0 equiv) | 3         | 52                     |
| 5     | OXONE (2.0 equiv)                                                         | 3         | 11                     |
| 6     | BQ (2.0 equiv)                                                            | 3         | 0                      |
| 7     | CAN (2.0 equiv)                                                           | 3         | 0                      |
| 8     | O <sub>2</sub> (balloon)                                                  | 3         | 0                      |
| 9     | PhI(OAc) <sub>2</sub> (2.0 equiv)                                         | 3         | 0                      |
| 10    | <i>t</i> -BuOOH (2.0 equiv)                                               | 3         | 0                      |
| 11    | DDQ (2.0 equiv)                                                           | 3         | 0                      |
| 12    | H <sub>2</sub> O <sub>2</sub> (2.0 equiv)                                 | 3         | 0                      |
| 13    | Ag <sub>2</sub> O (2.0 equiv)                                             | 3         | 0                      |
| 14    | NaIO <sub>4</sub> (2.0 equiv)                                             | 3         | 0                      |

<sup>a</sup> Reaction condition : **1a** (0.2 mmol), FeCl<sub>3</sub>· 6H<sub>2</sub>O (0.004 mmol), oxidant (0.4 mmol), DMA = N,N-dimethylacetamide (1.5 ml), 110 °C, BQ = 1,4-Benzoquinone, CAN = Ammonium ceric nitrate, DDQ = 2,3-Dichloro-5,6-dicyano-1,4-benzoquinone. <sup>b</sup> GC-MS yield.

## Typical experimental procedure for the synthesis of **2**, **4** and **5**

**1** or **3** (0.2 mmol), FeCl<sub>3</sub>· 6H<sub>2</sub>O (1.1 mg, 0.004 mmol), K<sub>2</sub>S<sub>2</sub>O<sub>8</sub> (108 mg, 0.4 mmol) and DMA (1.5 mL) were sequentially added to a 10-mL tube under air. Then the tube was sealed and stirred at 110 °C for 3 h. Upon completion (monitored by TLC), the resulting mixture was diluted with Et<sub>2</sub>O (15 mL) and washed by brine (10 mL × 3). The organic layer was then dried over Na<sub>2</sub>SO<sub>4</sub>, filtered and evaporated in *vacuo*, the residue was purified by column chromatography on silica gel (100-200 mesh) using petroleum ether-EtOAc as eluent to give desired products **2** or **4**.

To an oven-dried 10-mL tube were added **2j**, **2p-2v** (0.15 mmol), Pd(PPh<sub>3</sub>)<sub>4</sub> (7.3 mg, 0.0075 mmol) and Ag<sub>2</sub>SO<sub>4</sub> (94 mg, 0.30 mmol) sequentially, then the tube was evacuated and backfilled with Argon, NEt<sub>3</sub> (61 mg, 0.6 mmol) and degassed DMA (2.0 mL) were added by syringe under Argon. The tube was heated at 140 °C with stirring for 3 hours, then the resulting mixture was diluted with Et<sub>2</sub>O (10 mL) and washed by brine (10 mL × 3). The organic layer was then dried over Na<sub>2</sub>SO<sub>4</sub>, filtered and evaporated in *vacuo*, the residue was purified by column chromatography on silica gel (100-200 mesh) using petroleum ether-EtOAc as eluent to give desired products **5**.

## Characterization of all Products

### 2-phenyl-3-vinylquinoxaline (2a)

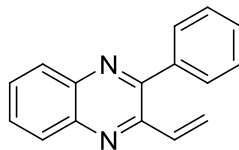

Orange oil;  $R_f$  = 0.69 (petroleum ether-EtOAc = 6:1);  $^1\text{H}$  NMR (500 MHz,  $\text{CDCl}_3$ ):  $\delta$  = 8.13 (dt,  $J_1$  = 7.5 Hz,  $J_2$  = 2.0 Hz, 2H), 7.78-7.70 (m, 4H), 7.57-7.51 (m, 3H), 7.08 (dd,  $J_1$  = 17.0 Hz,  $J_2$  = 10.5 Hz, 1H), 6.67 (dd,  $J_1$  = 16.8 Hz,  $J_2$  = 1.75 Hz, 1H), 5.64 (dd,  $J_1$  = 10.5 Hz,  $J_2$  = 2.0 Hz, 1H) ppm;  $^{13}\text{C}$  NMR (125 MHz,  $\text{CDCl}_3$ ):  $\delta$  = 153.9, 148.9, 141.6, 141.4, 139.2, 135.4, 133.9, 129.7, 129.7, 129.6, 129.2, 128.1, 122.3 ppm; MS (EI, 70eV):  $m/z$  (%) = 231 (48)  $[\text{M-H}]^+$ ; HRMS (EI) for  $\text{C}_{16}\text{H}_{12}\text{N}_2$ : calcd. 232.1000, found 232.1005.

### 2-(4-methoxyphenyl)-3-vinylquinoxaline (2b)

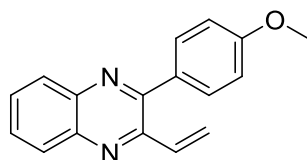

Yellow solid;  $R_f$  = 0.38 (petroleum ether-EtOAc = 6:1); mp = 69-70°C;  $^1\text{H}$  NMR (500 MHz,  $\text{CDCl}_3$ ):  $\delta$  = 8.13-8.10 (m, 2H), 7.76-7.72 (m, 2H), 7.69 (dd,  $J_1$  = 6.5 Hz,  $J_2$  = 2.0 Hz, 2H), 7.11 (dd,  $J_1$  = 17.0 Hz,  $J_2$  = 10.5 Hz, 1H), 7.07 (dd,  $J_1$  = 6.5 Hz,  $J_2$  = 2.0 Hz, 2H), 6.65 (dd,  $J_1$  = 17.0 Hz,  $J_2$  = 2.0 Hz, 1H), 5.65 (dd,  $J_1$  = 10.5 Hz,  $J_2$  = 2.0 Hz, 1H), 3.91 (s, 3H) ppm;  $^{13}\text{C}$  NMR (125 MHz,  $\text{CDCl}_3$ ):  $\delta$  = 160.5, 153.4, 148.9, 141.6, 141.3, 134.1, 131.2, 130.6, 129.6, 129.6, 129.1, 129.0, 122.2, 114.0, 55.4 ppm; MS (EI, 70eV):  $m/z$  (%) = 261 (100)  $[\text{M-H}]^+$ , 231 (45); HRMS (EI) for  $\text{C}_{17}\text{H}_{13}\text{N}_2\text{O}$ : calcd. 261.1028, found 261.1029.

### 2-p-tolyl-3-vinylquinoxaline (2c)

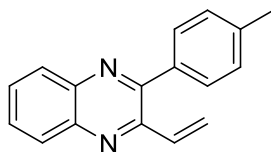

Orange solid;  $R_f$  = 0.59 (petroleum ether-EtOAc = 6:1); mp = 62-63°C;  $^1\text{H}$  NMR (500 MHz,  $\text{CDCl}_3$ ):  $\delta$  = 8.14-8.11 (m, 2H), 7.76-7.72 (m, 2H), 7.62 (d,  $J$  = 8.0 Hz, 2H), 7.35 (d,  $J$  = 8.0 Hz, 2H), 7.10 (dd,  $J_1$  = 17.0 Hz,  $J_2$  = 10.5 Hz, 1H), 6.66 (dd,  $J_1$  = 17.0 Hz,  $J_2$  = 1.5 Hz, 1H), 5.64 (dd,  $J_1$  = 10.5 Hz,  $J_2$  = 2.0 Hz, 1H), 2.47 (s, 3H) ppm;  $^{13}\text{C}$  NMR (125 MHz,  $\text{CDCl}_3$ ):  $\delta$  = 153.8, 148.8, 141.5, 141.5, 138.2, 133.7, 129.9, 129.7, 129.6, 129.1, 129.1, 128.5, 122.4, 21.4 ppm; MS (EI, 70eV):  $m/z$  (%) = 245 (100)  $[\text{M-H}]^+$ , 231 (59); HRMS (EI) for  $\text{C}_{17}\text{H}_{14}\text{N}_2$ : calcd. 246.1157, found 246.1174.

### 2-(2,4-dimethylphenyl)-3-vinylquinoxaline (2d)

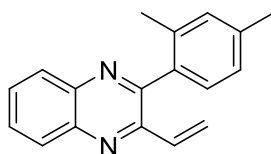

Yellow solid;  $R_f$  = 0.58 (petroleum ether-EtOAc = 6:1); mp = 65–66°C;  $^1\text{H}$  NMR (500 MHz,  $\text{CDCl}_3$ ):  $\delta$  = 8.16–8.10 (m, 2H), 7.79–7.73 (m, 2H), 7.22 (d,  $J$  = 8.5 Hz, 1H), 7.17–7.15 (m, 2H), 6.77 (dd,  $J_1$  = 17.0 Hz,  $J_2$  = 10.5 Hz, 1H), 6.63 (dd,  $J_1$  = 17.0 Hz,  $J_2$  = 2.0 Hz, 1H), 5.56 (dd,  $J_1$  = 10.5 Hz,  $J_2$  = 2.0 Hz, 1H), 2.42 (s, 3H), 2.13 (s, 3H) ppm;  $^{13}\text{C}$  NMR (125 MHz,  $\text{CDCl}_3$ ):  $\delta$  = 154.9, 149.4, 141.6, 141.5, 138.8, 136.1, 135.0, 133.0, 131.2, 129.9, 129.6, 129.2, 129.2, 126.8, 122.5, 21.3, 19.6 ppm; MS (EI, 70eV):  $m/z$  (%) = 259 (28)  $[\text{M-H}]^+$ , 245 (100); HRMS (EI) for  $\text{C}_{18}\text{H}_{16}\text{N}_2$ : calcd. 260.1313, found 260.1304.

### 2-(biphenyl-4-yl)-3-vinylquinoxaline (2e)

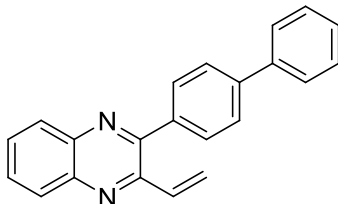

Yellow solid;  $R_f$  = 0.63 (petroleum ether-EtOAc = 6:1); mp = 89–90°C;  $^1\text{H}$  NMR (500 MHz,  $\text{CDCl}_3$ ):  $\delta$  = 8.17–8.14 (m, 2H), 7.75–7.83 (m, 6H), 7.70 (d,  $J$  = 7.0 Hz, 2H), 7.51 (t,  $J$  = 7.5 Hz, 2H), 7.42 (t,  $J$  = 7.5 Hz, 1H), 7.17 (dd,  $J_1$  = 17.0 Hz,  $J_2$  = 11.0 Hz, 1H), 6.71 (dd,  $J_1$  = 17.0 Hz,  $J_2$  = 1.5 Hz, 1H), 5.69 (dd,  $J_1$  = 10.5 Hz,  $J_2$  = 2.0 Hz, 1H) ppm;  $^{13}\text{C}$  NMR (125 MHz,  $\text{CDCl}_3$ ):  $\delta$  = 153.4, 148.8, 142.0, 141.7, 141.5, 140.5, 137.1, 133.8, 130.2, 129.9, 129.8, 129.2, 128.9, 127.7, 127.3, 127.2, 122.5 ppm; MS (EI, 70eV):  $m/z$  (%) = 307 (100)  $[\text{M-H}]^+$ ; HRMS (EI) for  $\text{C}_{22}\text{H}_{16}\text{N}_2$ : calcd. 308.1313, found 308.1315.

### 2-(4-fluorophenyl)-3-vinylquinoxaline (2f)

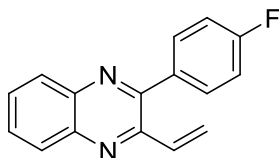

Orange solid;  $R_f$  = 0.66 (petroleum ether-EtOAc = 6:1); mp = 68–69°C;  $^1\text{H}$  NMR (500 MHz,  $\text{CDCl}_3$ ):  $\delta$  = 8.15–8.10 (m, 2H), 7.78–7.71 (m, 4H), 7.28–7.22 (m, 2H), 7.05 (dd,  $J_1$  = 17.0 Hz,  $J_2$  = 11.0 Hz, 1.2H), 6.67 (dd,  $J_1$  = 16.8 Hz,  $J_2$  = 1.75 Hz, 1H), 5.67 (dd,  $J_1$  = 11.0 Hz,  $J_2$  = 2.0 Hz, 0.8H) ppm;  $^{13}\text{C}$  NMR (125 MHz,  $\text{CDCl}_3$ ):  $\delta$  = 163.4 (d,  $J$  = 250.0 Hz), 152.6, 148.7, 141.5, 134.3, 133.6, 131.7 (d,  $J$  = 8.8 Hz), 130.0, 129.9, 129.2, 129.1, 128.8, 122.7, 115.6 (d,  $J$  = 21.3 Hz) ppm; MS (EI, 70eV):  $m/z$  (%) = 249 (100)  $[\text{M-H}]^+$ , 231 (100); HRMS (EI) for  $\text{C}_{16}\text{H}_{11}\text{N}_2\text{F}$ : calcd. 250.0906, found 250.0889.

### 2-(4-chlorophenyl)-3-vinylquinoxaline (2g)

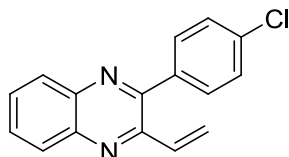

Yellow solid;  $R_f$  = 0.69 (petroleum ether-EtOAc = 6:1); mp = 94–95°C;  $^1\text{H}$  NMR (500 MHz,  $\text{CDCl}_3$ ):  $\delta$  = 8.15–8.10 (m, 2H), 7.80–7.74 (m, 2H), 7.67 (dd,  $J_1$  = 6.5 Hz,  $J_2$  = 2.0 Hz, 2H), 7.53 (dd,  $J_1$  = 6.5 Hz,  $J_2$  = 2.0 Hz, 2H), 7.04 (dd,  $J_1$  = 17.0 Hz,  $J_2$  = 10.5 Hz, 1H), 6.67 (dd,  $J_1$  = 17.0 Hz,  $J_2$  = 1.5 Hz, 1H), 5.67 (dd,  $J_1$  = 10.5 Hz,  $J_2$  = 2.0 Hz, 1H) ppm;  $^{13}\text{C}$  NMR (125 MHz,  $\text{CDCl}_3$ ):  $\delta$  = 152.5, 148.6, 141.6, 141.5, 136.7, 135.4, 133.4, 131.1, 130.1, 129.9, 129.7, 129.2, 129.1, 128.8, 128.5, 122.8 ppm; MS (EI, 70eV):  $m/z$  (%) = 265 (49)  $[\text{M-H}]^+$ , 231 (100); HRMS (EI) for  $\text{C}_{16}\text{H}_{11}\text{N}_2\text{Cl}$ : calcd. 266.0611, found 266.0624.

### 2-(4-bromophenyl)-3-vinylquinoxaline (2h)



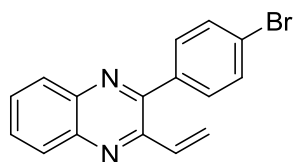

Yellow solid;  $R_f$ =0.67 (petroleum ether-EtOAc= 6:1); mp =105-106°C;  $^1\text{H}$  NMR (500 MHz,  $\text{CDCl}_3$ ):  $\delta$  = 8.15-8.10 (m, 2H), 7.80-7.74 (m, 2H), 7.69 (dd,  $J_1$  = 6.5 Hz,  $J_2$  = 2.0 Hz, 2H), 7.61 (dd,  $J_1$  = 6.5 Hz,  $J_2$  = 2.0 Hz, 2H), 7.03 (dd,  $J_1$  = 17.0 Hz,  $J_2$  = 11.0 Hz, 1H), 6.67 (dd,  $J_1$  = 17.0 Hz,  $J_2$  = 2.0 Hz, 1H), 5.67 (dd,  $J_1$  = 10.75 Hz,  $J_2$  = 1.75 Hz, 1H) ppm;  $^{13}\text{C}$  NMR (125 MHz,  $\text{CDCl}_3$ ):  $\delta$  = 152.5, 148.6, 141.6, 141.5, 137.2, 133.4, 131.7, 131.3, 130.2, 130.1, 129.9, 129.2, 129.1, 127.9, 123.7, 122.9 ppm; MS (EI, 70eV):  $m/z$  (%) = 311 (13)  $[\text{M}^+]$ , 231 (100); HRMS (EI) for  $\text{C}_{16}\text{H}_{11}\text{N}_2\text{Br}$ : calcd. 310.0106, found 310.0095.

### 2-(4-iodophenyl)-3-vinylquinoxaline (2i)

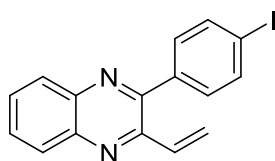

Yellow solid;  $R_f$ =0.58 (petroleum ether-EtOAc= 6:1); mp = 96-97°C;  $^1\text{H}$  NMR (500 MHz,  $\text{CDCl}_3$ ):  $\delta$  = 8.14-8.10 (m, 2H), 7.89 (d,  $J$  = 8.5 Hz, 2H), 7.80-7.75 (m, 2H), 7.47 (d,  $J$  = 8.0 Hz, 2H), 7.03 (dd,  $J_1$  = 17.0 Hz,  $J_2$  = 10.5 Hz, 1H), 6.67 (dd,  $J_1$  = 17.0 Hz,  $J_2$  = 2.0 Hz, 1H), 5.66 (dd,  $J_1$  = 10.75 Hz,  $J_2$  = 1.75 Hz, 1H) ppm;  $^{13}\text{C}$  NMR (125 MHz,  $\text{CDCl}_3$ ):  $\delta$  = 152.6, 148.5, 141.6, 137.7, 137.7, 133.4, 131.5, 130.1, 129.9, 129.2, 129.1, 122.9, 95.5 ppm; MS (EI, 70eV):  $m/z$  (%) = 357 (10)  $[\text{M-H}]^+$ , 231 (100); HRMS (EI) for  $\text{C}_{16}\text{H}_{11}\text{N}_2\text{I}$ : calcd. 357.9967, found 357.9956.

### 2-(2-bromophenyl)-3-vinylquinoxaline (2j)

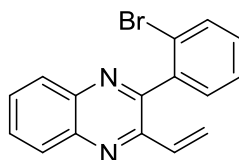

Pale yellow solid;  $R_f$ =0.58 (petroleum ether-EtOAc= 6:1); mp = 95-96°C;  $^1\text{H}$  NMR (500 MHz,  $\text{CDCl}_3$ ):  $\delta$  = 8.18-8.12 (m, 2H), 7.83-7.73 (m, 3H), 7.52-7.49 (m, 1H), 7.67 (dd,  $J_1$  = 7.8 Hz,  $J_2$  = 1.9 Hz, 1H), 7.39 (td,  $J$  = 7.8, 1.9 Hz, 1H), 6.73 (dd,  $J_1$  = 17.0 Hz,  $J_2$  = 10.5 Hz, 1H), 6.66 (dd,  $J_1$  = 16.8 Hz,  $J_2$  = 1.8 Hz, 1H), 5.60 (dd,  $J_1$  = 10.3 Hz,  $J_2$  = 2.3 Hz, 1H) ppm;  $^{13}\text{C}$  NMR (125 MHz,  $\text{CDCl}_3$ ):  $\delta$  = 153.5, 148.9, 142.0, 141.2, 139.3, 132.9, 132.6, 130.9, 130.5, 130.3, 129.8, 129.3, 129.2, 127.8, 122.9, 122.8 ppm; MS (EI, 70eV):  $m/z$  (%) = 310 (3)  $[\text{M}^+]$ , 231 (100); HRMS (EI) for  $\text{C}_{16}\text{H}_{11}\text{N}_2\text{Br}$ : calcd. 310.0106, found 310.0108.

### 2-(3-nitrophenyl)-3-vinylquinoxaline (2k)

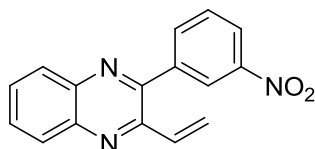

Yellow solid;  $R_f$ =0.38 (petroleum ether-EtOAc= 6:1); mp = 88-89°C;  $^1\text{H}$  NMR (500 MHz,  $\text{CDCl}_3$ ):  $\delta$  = 8.65 (t,  $J$  = 2.0 Hz, 1H), 8.39 (dd,  $J_1$  = 8.5 Hz,  $J_2$  = 1.5 Hz, 1H), 8.17 (dd,  $J_1$  = 8.0 Hz,  $J_2$  = 2.0 Hz, 1H), 8.13 (dd,  $J_1$  = 8.0 Hz,  $J_2$  = 1.5 Hz, 1H), 8.08 (dd,  $J_1$  = 6.5 Hz,  $J_2$  = 1.0 Hz, 1H), 7.85-7.78 (m, 2H), 7.74 (t,  $J$  = 8.0 Hz, 1H), 7.00 (dd,  $J_1$  = 17.0 Hz,  $J_2$  = 10.5 Hz, 1H), 6.73 (dd,  $J_1$  = 17.0 Hz,  $J_2$  = 1.5 Hz, 1H), 5.73 (dd,  $J_1$  = 10.75 Hz,  $J_2$  = 1.75 Hz, 1H) ppm;  $^{13}\text{C}$  NMR (125 MHz,  $\text{CDCl}_3$ ):  $\delta$  =

150.9, 148.4, 148.4, 141.9, 141.5, 140.0, 135.7, 132.8, 130.7, 130.3, 129.6, 129.3, 129.2, 124.9, 123.9, 123.8 ppm; MS (EI, 70eV):  $m/z$  (%) = 277 (50) [M<sup>+</sup>], 230 (100); HRMS (EI) for C<sub>16</sub>H<sub>11</sub>N<sub>3</sub>O<sub>2</sub>: calcd. 277.0851, found 277.0859.

### 2-(3-(trifluoromethyl)phenyl)-3-vinylquinoxaline (2l)

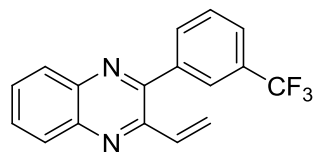

Orange oil;  $R_f$ =0.62 (petroleum ether-EtOAc= 6:1); <sup>1</sup>H NMR (500 MHz, CDCl<sub>3</sub>):  $\delta$  = 8.17-8.13 (m, 2H), 8.03 (s, 1H), 7.92 (d,  $J$  = 8.0 Hz, 1H), 7.83-7.77 (m, 3H), 7.69 (t,  $J$  = 8.0 Hz, 1H), 7.01 (dd,  $J_1$  = 17.0 Hz,  $J_2$  = 11.0 Hz, 1H), 6.71 (dd,  $J_1$  = 16.8 Hz,  $J_2$  = 1.8 Hz, 1H), 5.70 (dd,  $J_1$  = 10.5 Hz,  $J_2$  = 2.0 Hz, 1H) ppm; <sup>13</sup>C NMR (125 MHz, CDCl<sub>3</sub>):  $\delta$  = 152.1, 148.5, 141.7, 141.5, 139.1, 133.1, 133.0, 131.1 (q,  $J$  = 32.5 Hz), 130.4, 130.1, 129.3, 129.2, 129.0, 126.6 (q,  $J$  = 3.8 Hz), 125.9 (q,  $J$  = 3.8 Hz), 123.9 (q,  $J$  = 271.1 Hz), 123.2 ppm; MS (EI, 70eV):  $m/z$  (%) = 299 (100) [M-H]<sup>+</sup>, 231 (41); HRMS (EI) for C<sub>17</sub>H<sub>11</sub>N<sub>2</sub>F<sub>3</sub>: calcd. 300.0874, found 300.0865.

### 6,7-dimethyl-2-phenyl-3-vinylquinoxaline (2m)

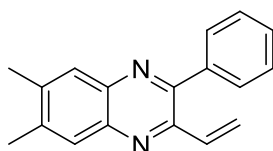

Yellow solid;  $R_f$ =0.53 (petroleum ether-EtOAc= 6:1); mp = 82-83°C; <sup>1</sup>H NMR (500 MHz, CDCl<sub>3</sub>):  $\delta$  = 7.88 (d,  $J$  = 8.5 Hz, 2H), 7.69 (d,  $J$  = 7.0 Hz, 2H), 7.54-7.49 (m, 3H), 7.05 (dd,  $J_1$  = 17.0 Hz,  $J_2$  = 11.0 Hz, 1H), 6.61 (dd,  $J_1$  = 17.0 Hz,  $J_2$  = 1.5 Hz, 1H), 5.59 (dd,  $J_1$  = 10.5 Hz,  $J_2$  = 1.5 Hz, 1H), 2.52 (s, 3H), 2.51 (s, 3H) ppm; <sup>13</sup>C NMR (125 MHz, CDCl<sub>3</sub>):  $\delta$  = 152.9, 147.8, 140.6, 140.5, 140.4, 140.3, 138.6, 133.9, 129.7, 128.8, 128.4, 128.2, 128.2, 121.4, 20.4, 20.3 ppm; MS (EI, 70eV):  $m/z$  (%) = 259 (100) [M-H]<sup>+</sup>; HRMS (EI) for C<sub>18</sub>H<sub>16</sub>N<sub>2</sub>: calcd. 260.1313, found 260.1322.

### 2-(thiophen-2-yl)-3-vinylquinoxaline (2n)

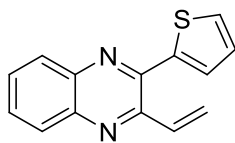

Brown oil;  $R_f$ =0.55 (petroleum ether-EtOAc= 6:1); <sup>1</sup>H NMR (500 MHz, CDCl<sub>3</sub>):  $\delta$  = 8.10-8.07 (m, 2H), 7.74-7.72 (m, 2H), 7.63 (d,  $J$  = 4.0 Hz, 1H), 7.57 (d,  $J$  = 4.5 Hz, 1H), 7.41 (dd,  $J_1$  = 16.8 Hz,  $J_2$  = 10.75 Hz, 1H), 7.21 (dd,  $J_1$  = 5.0 Hz,  $J_2$  = 3.5 Hz, 1H), 6.64 (dd,  $J_1$  = 17.0 Hz,  $J_2$  = 2.0 Hz, 1H), 5.77 (dd,  $J_1$  = 10.75 Hz,  $J_2$  = 1.75 Hz, 1H) ppm; <sup>13</sup>C NMR (125 MHz, CDCl<sub>3</sub>):  $\delta$  = 148.3, 147.0, 141.8, 141.4, 140.9, 134.0, 129.9, 129.8, 129.3, 129.1, 128.8, 127.8, 123.0 ppm; MS (EI, 70eV):  $m/z$  (%) = 237 (50) [M-H]<sup>+</sup>; HRMS (EI) for C<sub>14</sub>H<sub>10</sub>N<sub>2</sub>S: calcd. 238.0565, found 238.0560.

### 2-phenyl-3-(prop-1-en-2-yl)quinoxaline (2o)

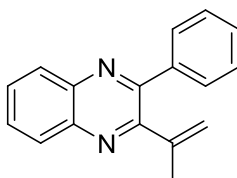

White solid;  $R_f$  = 0.56 (petroleum ether-EtOAc = 6:1); mp = 118-119°C;  $^1\text{H}$  NMR (500 MHz,  $\text{CDCl}_3$ ):  $\delta$  = 8.16-8.13 (m, 2H), 7.80-7.75 (m, 4H), 7.51-7.47 (m, 3H), 5.42 (t,  $J$  = 1.3 Hz, 1H), 5.33 (s, 1H), 2.05 (s, 3H) ppm;  $^{13}\text{C}$  NMR (125 MHz,  $\text{CDCl}_3$ ):  $\delta$  = 155.4, 152.9, 144.1, 141.2, 140.7, 139.4, 129.8, 129.8, 129.1, 129.1, 129.0, 128.5, 120.6, 21.9 ppm; MS (EI, 70eV):  $m/z$  (%) = 245 (30)  $[\text{M}-\text{H}]^+$ , 231 (100); HRMS (EI) for  $\text{C}_{17}\text{H}_{14}\text{N}_2$ : calcd. 246.1157, found 246.1151.

### 2-(2-bromo-4-methylphenyl)-3-vinylquinoxaline (2p)

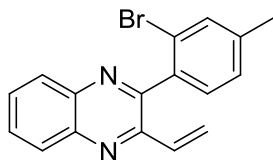

Isolated as yellow solid in 86% yield;  $R_f$  = 0.57 (petroleum ether-EtOAc = 6:1); mp 115-116°C;  $^1\text{H}$  NMR (500 MHz,  $\text{CDCl}_3$ ):  $\delta$  = 8.17-8.11 (m, 2H), 7.82-7.74 (m, 2H), 7.56 (s, 1H), 7.34 (d,  $J$  = 8.0 Hz, 1H), 7.30 (d,  $J$  = 8.0 Hz, 1H), 6.75 (dd,  $J_1$  = 17.0 Hz,  $J_2$  = 10.5 Hz, 1H), 6.65 (dd,  $J_1$  = 17.0 Hz,  $J_2$  = 2.0 Hz, 1H), 5.59 (dd,  $J_1$  = 10.5 Hz,  $J_2$  = 2.0 Hz, 1H), 2.45 (s, 3H) ppm;  $^{13}\text{C}$  NMR (125 MHz,  $\text{CDCl}_3$ ):  $\delta$  = 153.6, 149.1, 141.9, 141.3, 140.9, 136.4, 133.3, 132.3, 130.6, 130.2, 129.7, 129.3, 129.2, 128.6, 122.6, 122.5, 21.01 ppm; MS (EI, 70eV):  $m/z$  (%) = 324 (7)  $[\text{M}^+]$ , 245 (100); HRMS (EI) for  $\text{C}_{17}\text{H}_{13}\text{N}_2\text{Br}$ : calcd. 324.0262, found 324.0277.

### 2-(2-bromo-4-methoxyphenyl)-3-vinylquinoxaline (2q)

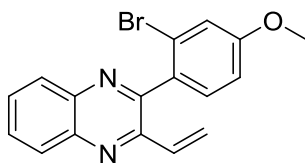

Isolated as pale yellow solid in 88% yield;  $R_f$  = 0.31 (petroleum ether-EtOAc = 6:1); mp = 117-118°C;  $^1\text{H}$  NMR (500 MHz,  $\text{CDCl}_3$ ):  $\delta$  = 8.16-8.11 (m, 2H), 7.81-7.74 (m, 2H), 7.38 (d,  $J$  = 8.5 Hz, 1H), 7.27 (d,  $J$  = 8.0 Hz, 1H), 7.04 (dd,  $J_1$  = 8.5 Hz,  $J_2$  = 2.5 Hz, 1H), 6.77 (dd,  $J_1$  = 17.0 Hz,  $J_2$  = 10.5 Hz, 1H), 6.65 (dd,  $J_1$  = 17.0 Hz,  $J_2$  = 2.0 Hz, 1H), 5.60 (dd,  $J_1$  = 10.5 Hz,  $J_2$  = 2.0 Hz, 1H), 3.90 (s, 3H) ppm;  $^{13}\text{C}$  NMR (125 MHz,  $\text{CDCl}_3$ ):  $\delta$  = 160.7, 153.4, 149.3, 141.9, 141.3, 132.9, 131.7, 131.5, 130.1, 129.6, 129.3, 129.2, 123.3, 122.6, 118.2, 113.9, 55.7 ppm; MS (EI, 70eV):  $m/z$  (%) = 340 (11)  $[\text{M}^+]$ , 261 (100); HRMS (EI) for  $\text{C}_{17}\text{H}_{15}\text{N}_2\text{Br}$ : calcd. 338.0419, found 338.0447.

### 2-(2-bromo-4-fluorophenyl)-3-vinylquinoxaline (2r)

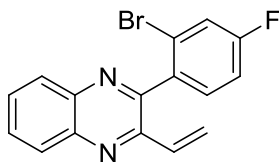

Isolated as pale yellow solid in 83% yield;  $R_f$  = 0.58 (petroleum ether-EtOAc = 6:1); mp = 129-130°C;  $^1\text{H}$  NMR (500 MHz,  $\text{CDCl}_3$ ):  $\delta$  = 8.17-8.10 (m, 2H), 7.84-7.76 (m, 2H), 7.50-7.44 (m, 2H), 7.24 (td,  $J_1$  = 8.3 Hz,  $J_2$  = 2.5 Hz, 1H), 6.71 (dd,  $J_1$  = 17.0 Hz,  $J_2$  = 9.5 Hz, 1H), 6.66 (dd,  $J_1$  = 17.0 Hz,  $J_2$  = 2.5 Hz, 1H), 5.62 (dd,  $J_1$  = 9.8 Hz,  $J_2$  = 2.8 Hz, 1H) ppm;  $^{13}\text{C}$  NMR (125 MHz,  $\text{CDCl}_3$ ):  $\delta$  = 162.7 (d,  $J$  = 252.5 Hz), 152.6, 149.0, 142.1, 141.2, 135.6 ((d,  $J$  = 3.5 Hz), 132.4, 132.1 (d,  $J$  = 8.7 Hz), 130.5, 130.0, 129.4, 129.2, 123.3 (d,  $J$  = 9.4 Hz), 123.1, 120.3 (d,  $J$  = 24.5 Hz), 115.2 (d,  $J$  = 21.6 Hz) ppm; MS (EI, 70eV):  $m/z$  (%) = 328 (7)  $[\text{M}^+]$ , 249 (100); HRMS (EI) for  $\text{C}_{16}\text{H}_{10}\text{N}_2\text{BrF}$ : calcd. 328.0011, found 328.0025.

### 2-(3-bromobiphenyl-4-yl)-3-vinylquinoxaline (2s)

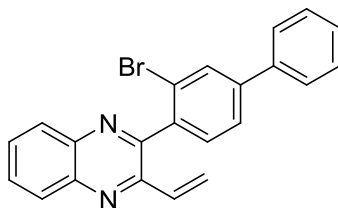

Isolated as yellow solid in 82% yield;  $R_f$ =0.48 (petroleum ether-EtOAc= 6:1); mp = 122-123°C;  $^1\text{H}$  NMR (500 MHz,  $\text{CDCl}_3$ ):  $\delta$  = 8.19-8.13 (m, 2H), 7.97 (d,  $J$  = 2.0 Hz, 1H), 7.84-7.76 (m, 2H), 7.72 (dd,  $J_1$  = 8.0 Hz,  $J_2$  = 2.0 Hz, 1H), 7.67-7.65 (m, 2H), 7.54-7.50 (m, 3H), 7.45-7.43 (m, 1H), 6.83 (dd,  $J_1$  = 16.8 Hz,  $J_2$  = 10.8 Hz, 1H), 6.70 (dd,  $J_1$  = 17.0 Hz,  $J_2$  = 2.0 Hz, 1H), 5.64 (dd,  $J_1$  = 10.8 Hz,  $J_2$  = 1.8 Hz, 1H) ppm;  $^{13}\text{C}$  NMR (125 MHz,  $\text{CDCl}_3$ ):  $\delta$  = 153.4, 149.0, 143.8, 142.0, 141.2, 139.1, 137.9, 132.7, 131.4, 131.2, 130.4, 129.8, 129.3, 129.2, 129.0, 128.2, 127.2, 126.5, 123.2, 122.9 ppm; MS (EI, 70eV):  $m/z$  (%) = 386 (7)  $[\text{M}^+]$ , 307 (100); HRMS (EI) for  $\text{C}_{22}\text{H}_{15}\text{N}_2\text{Br}$ : calcd. 386.0419, found 386.0418.

### 2-(3-bromonaphthalen-2-yl)-3-vinylquinoxaline (2t)

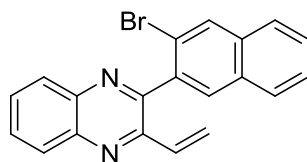

Isolated as yellow solid in 85% yield;  $R_f$ =0.56 (petroleum ether-EtOAc= 6:1); mp = 130-131°C;  $^1\text{H}$  NMR (500 MHz,  $\text{CDCl}_3$ ):  $\delta$  = 8.26 (s, 1H), 8.20 (d,  $J$  = 8.5 Hz, 1H), 8.15 (d,  $J$  = 8.0 Hz, 1H), 7.97 (s, 1H), 7.90-7.77 (m, 4H), 7.63-7.57 (m, 2H), 6.76 (dd,  $J_1$  = 17.0 Hz,  $J_2$  = 10.0 Hz, 1H), 6.67 (dd,  $J_1$  = 17.0 Hz,  $J_2$  = 2.0 Hz, 1H), 5.58 (dd,  $J_1$  = 10.8 Hz,  $J_2$  = 1.8 Hz, 1H) ppm;  $^{13}\text{C}$  NMR (125 MHz,  $\text{CDCl}_3$ ):  $\delta$  = 153.5, 149.3, 142.0, 141.2, 136.7, 134.5, 132.7, 132.2, 131.6, 130.4, 130.4, 129.9, 129.3, 129.3, 128.2, 127.7, 127.1, 126.9, 122.9, 119.8 ppm; MS (EI, 70eV):  $m/z$  (%) = 360 (4)  $[\text{M}^+]$ , 281 (100); HRMS (EI) for  $\text{C}_{20}\text{H}_{13}\text{N}_2\text{Br}$ : calcd. 360.0262, found 360.0257.

### 2-(2-bromo-5-chlorophenyl)-3-vinylquinoxaline (2u)

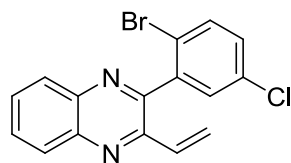

Isolated as yellow solid in 86% yield;  $R_f$ =0.65 (petroleum ether-EtOAc= 6:1); mp = 124-125°C;  $^1\text{H}$  NMR (500 MHz,  $\text{CDCl}_3$ ):  $\delta$  = 8.18-8.10 (m, 2H), 7.85-7.77 (m, 2H), 7.66 (d,  $J$  = 8.5 Hz, 1H), 7.47 (d,  $J$  = 2.5 Hz, 1H), 7.37 (dd,  $J_1$  = 9.0 Hz,  $J_2$  = 2.5 Hz, 1H), 6.72 (dd,  $J_1$  = 17.0 Hz,  $J_2$  = 9.0 Hz, 1H), 6.68 (dd,  $J_1$  = 16.8 Hz,  $J_2$  = 3.3 Hz, 1H), 5.64 (dd,  $J_1$  = 9.0 Hz,  $J_2$  = 3.5 Hz, 1H) ppm;  $^{13}\text{C}$  NMR (125 MHz,  $\text{CDCl}_3$ ):  $\delta$  = 152.2, 148.6, 142.1, 141.1, 140.7, 134.0, 132.2, 130.9, 130.6, 130.0, 129.4, 129.2, 123.3, 120.8 ppm; MS (EI, 70eV):  $m/z$  (%) = 344(1)  $[\text{M}^+]$ , 265 (100); HRMS (EI) for  $\text{C}_{16}\text{H}_{10}\text{N}_2\text{ClBr}$ : calcd. 343.9716, found 343.9748.

### 2-(2-bromophenyl)-6,7-dimethyl-3-vinylquinoxaline (2v)

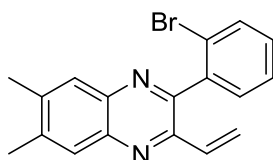

Isolated as yellow solid in 88% yield;  $R_f$  = 0.56 (petroleum ether-EtOAc= 6:1); mp = 114-115°C;  $^1\text{H}$  NMR (500 MHz,  $\text{CDCl}_3$ ):  $\delta$  = 7.92 (s, 1 H), 7.87 (s, 1 H), 7.72 (dd,  $J_1$  = 8.0 Hz,  $J_2$  = 1.0 Hz, 1 H), 7.49 (td,  $J_1$  = 7.5 Hz,  $J_2$  = 1.0 Hz, 1 H), 7.44 (dd,  $J_1$  = 7.5 Hz,  $J_2$  = 2.0 Hz, 1 H), 7.37 (td,  $J_1$  = 7.5 Hz,  $J_2$  = 2.0 Hz, 1 H), 6.70 (dd,  $J_1$  = 17.0 Hz,  $J_2$  = 10.5 Hz, 1 H), 6.59 (dd,  $J_1$  = 17.0 Hz,  $J_2$  = 2.0 Hz, 1 H), 5.54 (dd,  $J_1$  = 10.5 Hz,  $J_2$  = 2.0 Hz, 1 H), 2.53 (s, 3 H), 2.51 (s, 3 H) ppm;  $^{13}\text{C}$  NMR (125 MHz,  $\text{CDCl}_3$ ):  $\delta$  = 152.6, 147.9, 141.0, 140.9, 140.5, 140.2, 139.5, 132.8, 132.7, 130.9, 130.3, 128.2, 127.7, 123.0, 121.9, 20.4, 20.4 ppm; MS (EI, 70eV):  $m/z$  (%) = 338 (12) [ $\text{M}^+$ ], 259 (100); HRMS (EI) for  $\text{C}_{18}\text{H}_{15}\text{N}_2\text{Br}$ : calcd. 338.0419, found 338.0414.

### 2-phenoxy-3-vinylquinoxaline (4b)

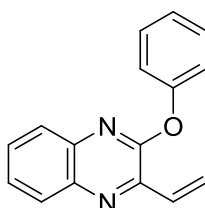

Yellow solid;  $R_f$  = 0.75 (petroleum ether-EtOAc= 6:1); mp = 75-76°C;  $^1\text{H}$  NMR (500 MHz,  $\text{CDCl}_3$ ):  $\delta$  = 8.06-8.04 (m, 1 H), 7.72-7.69 (m, 1 H), 7.62-7.58 (m, 2 H), 7.48 (t,  $J$  = 7.8 Hz, 2 H), 7.42 (dd,  $J_1$  = 17.0 Hz,  $J_2$  = 11.0 Hz, 1 H), 7.32-7.29 (m, 3 H), 6.80 (dd,  $J_1$  = 17.3 Hz,  $J_2$  = 1.8 Hz, 1 H), 5.83 (dd,  $J_1$  = 11.0 Hz,  $J_2$  = 1.5 Hz, 1 H) ppm;  $^{13}\text{C}$  NMR (125 MHz,  $\text{CDCl}_3$ ):  $\delta$  = 155.1, 153.0, 143.8, 139.7 (2C), 130.5, 129.6, 129.5, 128.8, 127.5, 127.3, 125.2, 123.6, 121.7 ppm; MS (EI, 70eV):  $m/z$  (%) = 248 (100) [ $\text{M}^+$ ], 219 (100); HRMS (EI) for  $\text{C}_{16}\text{H}_{12}\text{N}_2\text{O}$ : calcd. 248.0950, found 248.0962.

### 2-methoxy-3-vinylquinoxaline (4c)

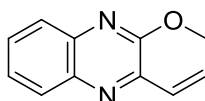

Yellow oil;  $R_f$  = 0.75 (petroleum ether-EtOAc= 6:1);  $^1\text{H}$  NMR (500 MHz,  $\text{CDCl}_3$ ):  $\delta$  = 8.00 (dd,  $J_1$  = 8.3 Hz,  $J_2$  = 1.3 Hz, 1 H), 7.83 (dd,  $J_1$  = 8.3 Hz,  $J_2$  = 1.3 Hz, 1 H), 7.63 (td,  $J_1$  = 7.8 Hz,  $J_2$  = 1.5 Hz, 1 H), 7.57-7.54 (m, 1 H), 7.23 (dd,  $J_1$  = 17.5 Hz,  $J_2$  = 11.0 Hz, 1 H), 6.67 (dd,  $J_1$  = 17.5 Hz,  $J_2$  = 2.0 Hz, 1 H), 5.74 (dd,  $J_1$  = 11.0 Hz,  $J_2$  = 2.0 Hz, 1 H), 4.15 (s, 3 H) ppm;  $^{13}\text{C}$  NMR (125 MHz,  $\text{CDCl}_3$ ):  $\delta$  = 155.8, 143.8, 140.2, 138.8, 130.8, 129.4, 128.8, 126.7, 126.6, 123.1, 53.7 ppm; MS (EI, 70eV):  $m/z$  (%) = 186 (100) [ $\text{M}^+$ ], 157 (43); HRMS (EI) for  $\text{C}_{11}\text{H}_{10}\text{N}_2\text{O}$ : calcd. 186.0793, found 186.0799.

### methyl 3-vinylquinoxaline-2-carboxylate (4d)

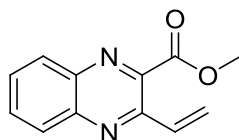

Orange solid;  $R_f$  = 0.32 (petroleum ether-EtOAc= 6:1); mp = 66-67°C;  $^1\text{H}$  NMR (500 MHz,  $\text{CDCl}_3$ ):  $\delta$  = 8.18 (dd,  $J_1$  = 8.5 Hz,  $J_2$  = 1.0 Hz, 1 H), 8.12 (dd,  $J_1$  = 8.5 Hz,  $J_2$  = 1.0 Hz, 1 H), 7.86 (ddd,  $J_1$  = 8.3 Hz,  $J_2$  = 6.9 Hz,  $J_3$  = 1.5 Hz, 1 H), 7.79 (ddd,  $J_1$  = 8.3 Hz,  $J_2$  = 6.9 Hz,  $J_3$  = 1.4 Hz, 1 H), 7.54 (dd,  $J_1$  = 17.0 Hz,  $J_2$  = 11.0 Hz, 1 H), 6.70 (dd,  $J_1$  = 16.8 Hz,  $J_2$  = 1.8 Hz, 1 H), 5.77 (dd,  $J_1$  = 10.8 Hz,  $J_2$  = 1.8 Hz, 1 H), 4.10 (s, 3 H) ppm;  $^{13}\text{C}$  NMR (125 MHz,  $\text{CDCl}_3$ ):  $\delta$  = 165.9, 148.9, 142.9 (2C), 140.4,

132.0 (2C), 130.4, 129.7, 129.3, 123.7, 53.3 ppm; MS (EI, 70eV):  $m/z$  (%) = 214 (86) [M<sup>+</sup>], 199 (59), 156 (100); HRMS (EI) for C<sub>12</sub>H<sub>10</sub>N<sub>2</sub>O<sub>2</sub>: calcd. 214.0742, found 214.0750.

### 2-phenyl-3-vinylpyrazine (4e)

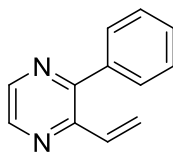

Yellow oil;  $R_f$  = 0.50 (petroleum ether-EtOAc= 6:1); <sup>1</sup>H NMR (500 MHz, CDCl<sub>3</sub>):  $\delta$  = 8.56 (s, 2 H), 7.63-7.62 (m, 2 H), 7.53-7.48 (m, 3 H), 6.95 (dd,  $J_1$  = 17.0 Hz,  $J_2$  = 10.5 Hz, 1 H), 6.56 (dd,  $J_1$  = 17.0 Hz,  $J_2$  = 2.0 Hz, 1 H), 5.58 (dd,  $J_1$  = 11.0 Hz,  $J_2$  = 1.5 Hz, 1 H) ppm; <sup>13</sup>C NMR (125 MHz, CDCl<sub>3</sub>):  $\delta$  = 152.6, 148.1, 142.5, 142.4, 137.5, 132.8, 129.6, 129.0, 128.4, 121.5 ppm; MS (EI, 70eV):  $m/z$  (%) = 181 (100) [M-H]<sup>+</sup>; HRMS (EI) for C<sub>12</sub>H<sub>10</sub>N<sub>2</sub>: calcd. 182.0844, found 182.0840.

### 3-phenyl-2-vinylquinoline (4g)

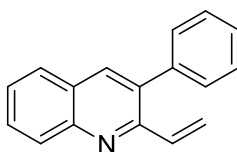

Yellow oil;  $R_f$  = 0.63 (petroleum ether-EtOAc= 6:1); <sup>1</sup>H NMR (500 MHz, CDCl<sub>3</sub>):  $\delta$  = 8.17 (d,  $J$  = 8.5 Hz, 1H), 8.05 (s, 1H), 7.81 (d,  $J$  = 8.0 Hz, 1H), 7.75-7.71 (m, 1H), 7.55-7.45 (m, 6H), 6.99 (dd,  $J_1$  = 17.0 Hz,  $J_2$  = 10.5 Hz, 1H), 6.61 (dd,  $J_1$  = 17.0 Hz,  $J_2$  = 2.0 Hz, 1H), 5.53 (dd,  $J_1$  = 10.5 Hz,  $J_2$  = 2.0 Hz, 1H) ppm; <sup>13</sup>C NMR (125 MHz, CDCl<sub>3</sub>):  $\delta$  = 153.5, 147.3, 139.1, 136.7, 134.8, 134.7, 129.8, 129.5, 129.4, 128.4, 127.7, 127.5, 127.4, 126.5, 120.9 ppm; MS (EI, 70eV):  $m/z$  (%) = 230 (100) [M-H]<sup>+</sup>; HRMS (EI) for C<sub>17</sub>H<sub>13</sub>N: calcd. 231.1048, found 231.1040.

### 3-(naphthalen-2-yl)-2-vinylquinoline (4h)

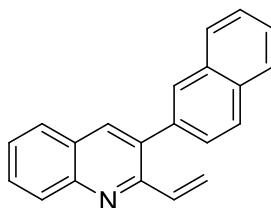

Pale yellow solid;  $R_f$  = 0.58 (petroleum ether-EtOAc= 6:1); mp = 85-86°C; <sup>1</sup>H NMR (500 MHz, CDCl<sub>3</sub>):  $\delta$  = 8.21 (d,  $J$  = 9.0 Hz, 1H), 7.92 (dd,  $J_1$  = 9.0 Hz,  $J_2$  = 5.5 Hz, 3H), 7.78-7.74 (m, 3H), 7.58-7.57 (m, 2H), 7.54-7.51 (m, 1H), 7.48-7.45 (m, 1H), 7.32 (ddd,  $J_1$  = 8.2 Hz,  $J_2$  = 6.8 Hz,  $J_3$  = 1.2 Hz, 1H), 6.99 (d,  $J$  = 8.5 Hz, 1H), 6.86 (d,  $J$  = 2.0 Hz, 1H), 5.74 (d,  $J$  = 2.0 Hz, 1H) ppm; <sup>13</sup>C NMR (125 MHz, CDCl<sub>3</sub>):  $\delta$  = 157.9, 148.1, 147.9, 138.6, 136.3, 133.7, 132.0, 129.8, 129.6, 128.3, 128.3, 127.5, 127.4, 126.3, 126.1, 125.9, 125.6, 121.6, 120.4 ppm; MS (EI, 70eV):  $m/z$  (%) = 280 (100) [M-H]<sup>+</sup>; HRMS (EI) for C<sub>21</sub>H<sub>15</sub>N: calcd. 281.1204, found 281.1205.

### diethyl 2-methyl-6-vinylpyridine-3,5-dicarboxylate (4j)

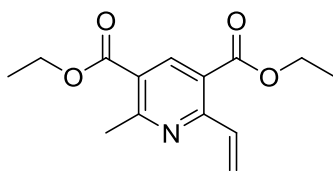

White solid;  $R_f$  = 0.63 (petroleum ether-EtOAc= 6:1); mp = 47-48°C;  $^1\text{H}$  NMR (500 MHz,  $\text{CDCl}_3$ ):  $\delta$  = 8.67 (s, 1 H), 7.67 (dd,  $J_1$  = 16.9 Hz,  $J_2$  = 10.6 Hz, 1 H), 6.66 (dd,  $J_1$  = 16.9 Hz,  $J_2$  = 2.3 Hz, 1 H), 5.68 (dd,  $J_1$  = 10.6 Hz,  $J_2$  = 2.3 Hz, 1 H), 4.44-4.39 (m, 4H), 2.89 (s, 3 H), 1.43 (t,  $J$  = 7.1 Hz, 6H) ppm;  $^{13}\text{C}$  NMR (125 MHz,  $\text{CDCl}_3$ ):  $\delta$  = 165.9 (2C), 162.3, 156.3, 141.3, 133.3, 123.9, 123.7, 121.8, 61.6, 61.4, 25.3, 14.3 (2C) ppm; MS (EI, 70eV):  $m/z$  (%) = 263 (48)  $[\text{M}^+]$ , 234 (93), 206 (100) HRMS (EI) for  $\text{C}_{14}\text{H}_{17}\text{NO}_4$ : calcd. 263.1158, found 263.1161.

### benzo[a]phenazine (5j)

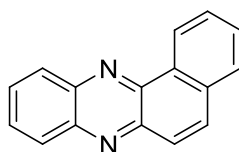

Yellow solid;  $R_f$  = 0.42 (petroleum ether-EtOAc= 6:1); mp = 142-143°C (lit.<sup>[11]</sup> 142°C);  $^1\text{H}$  NMR (500 MHz,  $\text{CDCl}_3$ ):  $\delta$  = 9.41 (d,  $J$  = 8.5 Hz, 1H), 8.38-8.36 (m, 1H), 8.30-8.28 (m, 1H), 8.01 (d,  $J$  = 9.5 Hz, 1H), 7.97 (d,  $J$  = 9.5 Hz, 1H), 7.91-7.86 (m, 3H), 7.82-7.76 (m, 2H) ppm;  $^{13}\text{C}$  NMR (125 MHz,  $\text{CDCl}_3$ ):  $\delta$  = 143.4, 142.7, 142.6, 142.0, 133.3, 133.2, 131.1, 130.0, 129.8 (2C), 129.7, 129.2, 128.2, 127.9, 127.1, 125.4 ppm; MS (EI, 70eV):  $m/z$  (%) = 230 (100)  $[\text{M}^+]$ .

### 3-methylbenzo[a]phenazine (5p)

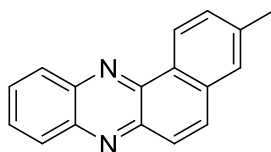

Yellow solid;  $R_f$  = 0.48 (petroleum ether-EtOAc= 6:1); mp = 186-187°C;  $^1\text{H}$  NMR (500 MHz,  $\text{CDCl}_3$ ):  $\delta$  = 9.29 (d,  $J$  = 8.0 Hz, 1H), 8.38-8.29 (m, 2H), 7.97 (s, 2H), 7.89-7.85 (m, 2H), 7.71 (s, 1H), 7.64 (dd,  $J_1$  = 8.5 Hz,  $J_2$  = 1.0 Hz, 1 H), 2.63 (s, 3H) ppm;  $^{13}\text{C}$  NMR (125 MHz,  $\text{CDCl}_3$ ):  $\delta$  = 143.4, 142.9, 142.3, 142.1, 140.2, 133.4, 129.9, 129.8, 129.7, 129.6, 129.1, 128.9, 128.2, 127.0, 125.4, 21.8 ppm; MS (EI, 70eV):  $m/z$  (%) = 244 (100)  $[\text{M}^+]$ ; HRMS (EI) for  $\text{C}_{17}\text{H}_{12}\text{N}_2$ : calcd. 244.1000, found 244.0977.

### 3-methoxybenzo[a]phenazine (5q)

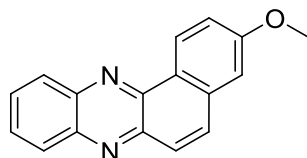

Yellow solid;  $R_f$  = 0.28 (petroleum ether-EtOAc= 6:1); mp = 166-167°C (lit.<sup>[12]</sup> 160-161°C);  $^1\text{H}$  NMR (500 MHz,  $\text{CDCl}_3$ ):  $\delta$  = 9.30 (d,  $J$  = 8.5 Hz, 1H), 8.33 (dd,  $J_1$  = 7.3 Hz,  $J_2$  = 2.3 Hz, 1H), 8.27 (dd,  $J_1$  = 7.3 Hz,  $J_2$  = 2.3 Hz, 1H), 7.96 (d,  $J$  = 9.0 Hz, 1H), 7.93 (d,  $J$  = 9.0 Hz, 1H), 7.87-7.82 (m, 2 H), 7.38 (dd,  $J_1$  = 9.0 Hz,  $J_2$  = 2.5 Hz, 1H), 7.28 (d,  $J$  = 2.5 Hz, 1H), 4.00 (s, 3H) ppm;  $^{13}\text{C}$  NMR (125 MHz,  $\text{CDCl}_3$ ):  $\delta$  = 161.1, 142.8, 142.7, 142.1, 142.0, 134.9, 133.2, 129.8, 129.6, 129.5, 129.1, 127.6, 127.2, 124.8, 117.1, 109.7, 55.6 ppm; MS (EI, 70eV):  $m/z$  (%) = 260 (100)  $[\text{M}^+]$ , 245 (7).

### 3-fluorobenzo[a]phenazine (5r)

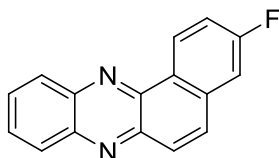

Yellow solid;  $R_f = 0.54$  (petroleum ether-EtOAc= 6:1); mp = 195-196°C;  $^1\text{H}$  NMR (500 MHz,  $\text{CDCl}_3$ ):  $\delta = 9.42$  (dd,  $J_1 = 9.0$  Hz,  $J_2 = 6.0$  Hz, 1H), 8.37-8.28 (m, 2H), 8.02 (d,  $J = 9.5$  Hz, 1H), 7.95 (d,  $J = 9.0$  Hz, 1H), 7.91-7.87 (m, 2H), 7.58-7.51 (m, 2H) ppm;  $^{13}\text{C}$  NMR (125 MHz,  $\text{CDCl}_3$ ):  $\delta = 163.6$  (d,  $J = 250.0$  Hz), 143.2, 142.8, 142.2, 142.2, 135.0 (d,  $J = 9.1$  Hz), 132.2, 130.1, 130.1, 129.7, 129.3, 128.7, 128.1 (d,  $J = 9.1$  Hz), 127.7, 116.4 (d,  $J = 23.1$  Hz), 113.1 (d,  $J = 21.5$  Hz) ppm; MS (EI, 70eV):  $m/z$  (%) = 248 (100)  $[\text{M}^+]$ ; HRMS (EI) for  $\text{C}_{16}\text{H}_9\text{N}_2\text{F}$ : calcd. 248.0750, found 248.0748.

### 3-phenylbenzo[a]phenazine (5s)

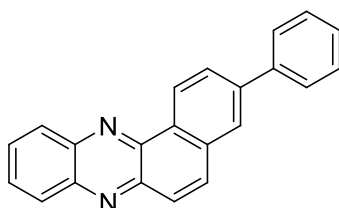

Yellow solid;  $R_f = 0.50$  (petroleum ether-EtOAc= 6:1); mp = 179-180°C;  $^1\text{H}$  NMR (500 MHz,  $\text{CDCl}_3$ ):  $\delta = 9.44$  (d,  $J = 8.5$  Hz, 1H), 8.39-8.29 (m, 2H), 8.10 (d,  $J = 1.5$  Hz, 1H), 8.11-8.04 (m, 2H), 8.00 (d,  $J = 9.5$  Hz, 1H), 7.90-7.86 (m, 2H), 7.80 (d,  $J = 7.5$  Hz, 2H), 7.55 (t,  $J = 7.8$  Hz, 2H), 7.45 (t,  $J = 7.5$  Hz, 1H) ppm;  $^{13}\text{C}$  NMR (125 MHz,  $\text{CDCl}_3$ ):  $\delta = 143.6$ , 142.6, 142.6, 142.1, 140.4, 133.6, 133.5, 130.1, 130.0, 129.9, 129.7, 129.1, 129.0, 128.0, 127.5, 127.0, 126.4, 126.0 ppm; MS (EI, 70eV):  $m/z$  (%) = 306 (100)  $[\text{M}^+]$ ; HRMS (EI) for  $\text{C}_{22}\text{H}_{14}\text{N}_2$ : calcd. 306.1157, found 306.1151.

### naphtho[2,3-a]phenazine (5t)

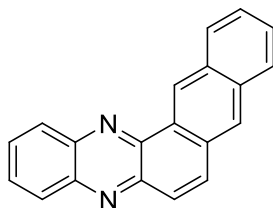

Yellow solid;  $R_f = 0.43$  (petroleum ether-EtOAc= 6:1); mp = 225-226°C (lit.<sup>[13]</sup> 220°C);  $^1\text{H}$  NMR (500 MHz,  $\text{CDCl}_3$ ):  $\delta = 9.80$  (s, 1H), 8.37-8.35 (m, 1H), 8.28-8.23 (m, 3H), 8.05 (dd,  $J_1 = 8.5$  Hz,  $J_2 = 3.5$  Hz, 1H), 7.98 (d,  $J = 9.5$  Hz, 1H), 7.88-7.83 (m, 2H), 7.78 (d,  $J = 9.5$  Hz, 1H), 7.65-7.62 (m, 2H) ppm;  $^{13}\text{C}$  NMR (125 MHz,  $\text{CDCl}_3$ ):  $\delta = 144.6$ , 144.0, 142.4, 141.6, 134.2, 133.7, 132.4, 130.8, 129.8, 129.7, 129.5, 129.3, 129.0, 128.9, 128.1, 127.3, 127.2, 127.1, 126.7, 125.7 ppm; MS (EI, 70eV):  $m/z$  (%) = 280 (100)  $[\text{M}^+]$ .

### 2-chlorobenzo[a]phenazine (5u)

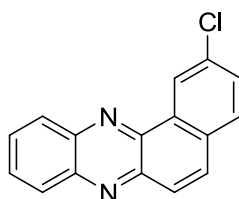



Yellow solid;  $R_f = 0.49$  (petroleum ether-EtOAc= 6:1); mp = 208-209°C;  $^1\text{H}$  NMR (500 MHz,  $\text{CDCl}_3$ ):  $\delta = 9.34$  (d,  $J = 2.0$  Hz, 1H), 8.36-8.27 (m, 2H), 7.96 (s, 2H), 7.90-7.88 (m, 2H), 7.83 (d,  $J = 8.5$  Hz, 1H), 7.71 (dd,  $J_1 = 8.5$  Hz,  $J_2 = 2.0$  Hz, 1 H) ppm;  $^{13}\text{C}$  NMR (125 MHz,  $\text{CDCl}_3$ ):  $\delta = 143.4, 143.0, 142.0, 141.5, 134.3, 132.4, 132.2, 131.4, 130.5, 130.1, 130.09, 129.8, 129.5, 129.2, 127.4, 125.0$  ppm; MS (EI, 70eV):  $m/z$  (%) = 264 (100)  $[\text{M}^+]$ , 229 (24); HRMS (EI) for  $\text{C}_{16}\text{H}_9\text{N}_2\text{Cl}$ : calcd. 264.0454, found 264.0462.

### 9,10-dimethylbenzo[a]phenazine (5v)

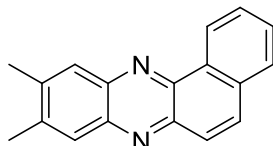

Pale yellow solid;  $R_f = 0.47$  (petroleum ether-EtOAc= 6:1); mp = 211-212°C;  $^1\text{H}$  NMR (500 MHz,  $\text{CDCl}_3$ ):  $\delta = 9.39$  (d,  $J = 8.0$  Hz, 1H), 8.10 (s, 1H), 8.01 (s, 1H), 8.00-7.94 (m, 2H), 7.91 (d,  $J = 7.5$  Hz, 1H), 7.81-7.74 (m, 2H), 2.58 (s, 3H), 2.57 (s, 3H) ppm;  $^{13}\text{C}$  NMR (125 MHz,  $\text{CDCl}_3$ ):  $\delta = 143.0, 142.0, 142.0, 141.3, 141.1, 140.9, 133.1, 132.3, 131.4, 129.3, 128.4, 128.1, 127.9, 127.7, 127.3, 125.1, 20.6, 20.5$  ppm; MS (EI, 70eV):  $m/z$  (%) = 258 (100), 243 (30)  $[\text{M}^+]$ ; HRMS (EI) for  $\text{C}_{18}\text{H}_{14}\text{N}_2$ : calcd. 258.1157, found 258.1145.

## Preliminary mechanistic studys

### Effect of radical scavenger TEMPO on the reaction

**Table 4.** Effect of radical scavenger TEMPO <sup>a</sup>

| Entry | TEMPO     | Conversion (%) | Yields of <b>2a</b> (%) <sup>b</sup> |
|-------|-----------|----------------|--------------------------------------|
| 1     | 0         | 100            | 94                                   |
| 2     | 50 mol %  | 90             | 64 <sup>c</sup>                      |
| 3     | 200 mol % | 97             | 5 <sup>c</sup>                       |

<sup>a</sup> Reaction condition : **1a** (0.2 mmol),  $\text{FeCl}_3 \cdot 6\text{H}_2\text{O}$  (0.004 mmol),  $\text{K}_2\text{S}_2\text{O}_8$  (0.4 mmol), DMA (1.5 mL), 110 °C, under air, 3h. <sup>b</sup> GC-MS yields. <sup>c</sup> An oxidation product 3-phenylquinoxaline-2-carbaldehyde was formed as a side product.

### Deuterated experiments

All the deuterated experiments were carried out twice.

(a) **1a** treated with  $[\text{D}_7]$ DMF under the present condition

**1a** (0.2 mmol),  $\text{FeCl}_3 \cdot 6\text{H}_2\text{O}$  (1.1 mg, 0.004 mmol),  $\text{K}_2\text{S}_2\text{O}_8$  (108 mg, 0.4 mmol) and  $[\text{D}_7]$  DMF (1.2 mL) were sequentially added to a 10-mL tube under air. Then the tube was sealed and stirred at 110 °C for 3 h. Upon completion (monitored by TLC), the resulting mixture was diluted with  $\text{Et}_2\text{O}$  (15 mL) and washed

by brine (10 mL  $\times$  3). The organic layer was then dried over Na<sub>2</sub>SO<sub>4</sub>, filtered and evaporated in *vacuo*, the residue was purified by column chromatography on silica gel (100-200 mesh) using petroleum ether-EtOAc as eluent to give [D<sub>2</sub>]2a and [D<sub>3</sub>]2a in the ratio 2 : 1.

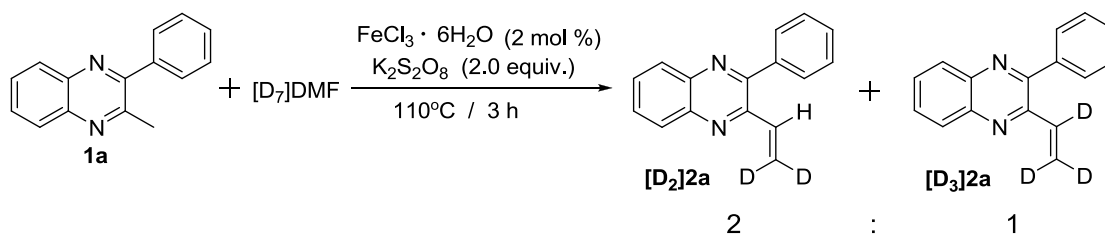

**Scheme 1.** Synthesis of [D<sub>2</sub>]2a and [D<sub>3</sub>]2a

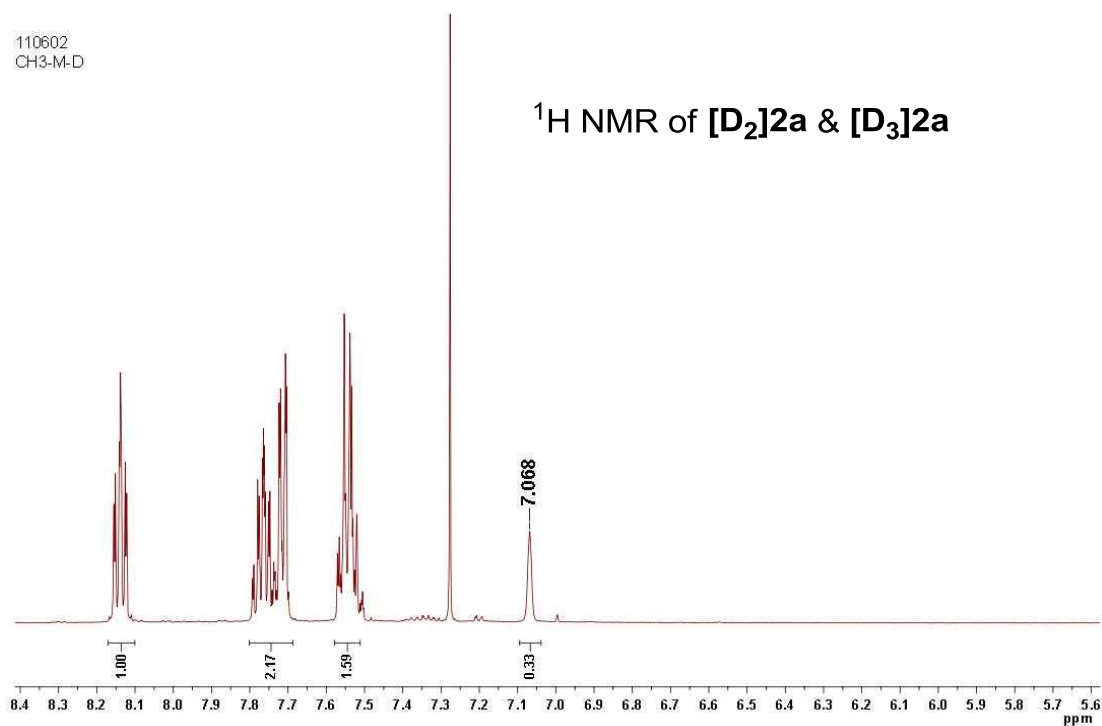

101015  
OLE001 CDCl3

# <sup>1</sup>H NMR of **2a**

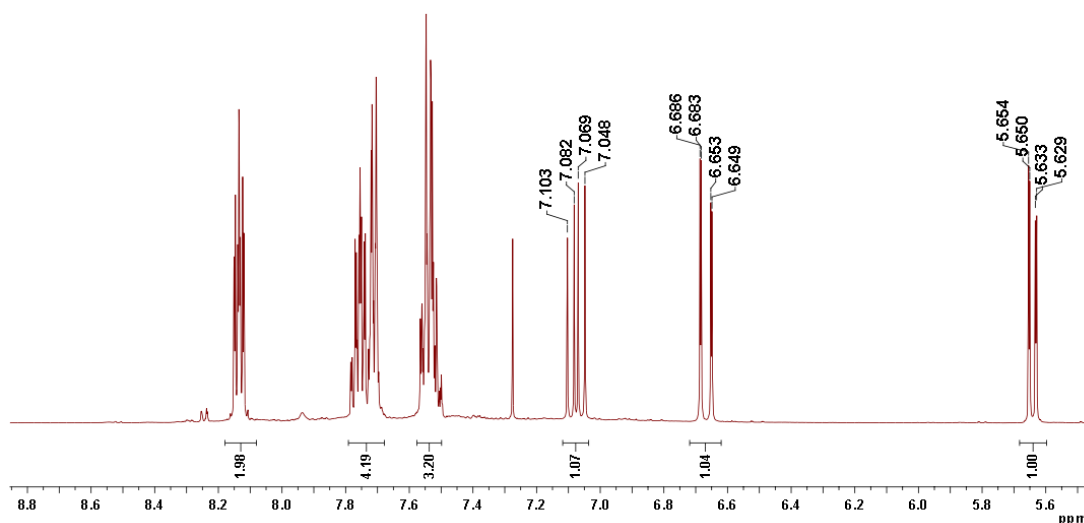

**Figure 2.** <sup>1</sup>H NMR spectra of deuterated products

(b) **2a** treated with [D<sub>7</sub>]DMF under the present condition

**2a** (0.2 mmol), FeCl<sub>3</sub>·6H<sub>2</sub>O (1.1 mg, 0.004 mmol), K<sub>2</sub>S<sub>2</sub>O<sub>8</sub> (108 mg, 0.4 mmol) and [D<sub>7</sub>] DMF (1.2 mL) were sequentially added to a 10-mL tube under air. Then the tube was sealed and stirred at 110 °C for 3 h. The resulting mixture was diluted with Et<sub>2</sub>O (15 mL) and washed by brine (10 mL × 3). The organic layer was then dried over Na<sub>2</sub>SO<sub>4</sub>, filtered and evaporated in *vacuo*, the residue was purified by column chromatography on silica gel (100-200 mesh) using petroleum ether-EtOAc as eluent. **2a** was recovered in 94% yield, and no obvious deuterated of **2a** were detected according to the <sup>1</sup>H NMR result.

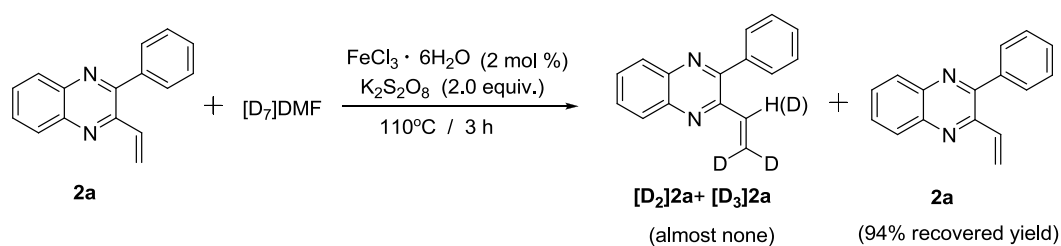

**Scheme 2.** **2a** treated with [D<sub>7</sub>]DMF

Deuterated experiments (a) and (b) indicated that the C-H bond activation occurs on both coupling partners and the terminal vinyl carbon should be given by the N,N-dimethyl moiety of amides. In addition, the 2 : 1 ratio of [D<sub>2</sub>]2a and [D<sub>3</sub>]2a might be obtained through the following process. Firstly, the in-situ generated deuterium ion exchanged immediately with the benzylic hydrogen of [Fe]-promoted **1a** to form

**[D<sub>1</sub>]**6a. Then **6a** or **[D<sub>1</sub>]**6a fastly attacked the iminium **8**, intermediate **[D<sub>6</sub>]**9a and **[D<sub>7</sub>]**9a was thus generated respectively in the ratio of **1:2**. Then the **[D<sub>6</sub>]**9a occurred elimination to form **[D<sub>2</sub>]**2a entirely, meanwhile the **[D<sub>7</sub>]**9a occurred elimination to give the product **[D<sub>3</sub>]**2a and **[D<sub>2</sub>]**2a in the ratio of **1:1**. To sum up, the ratio of **[D<sub>2</sub>]**2a and **[D<sub>3</sub>]**2a was eventually come to **2:1**.

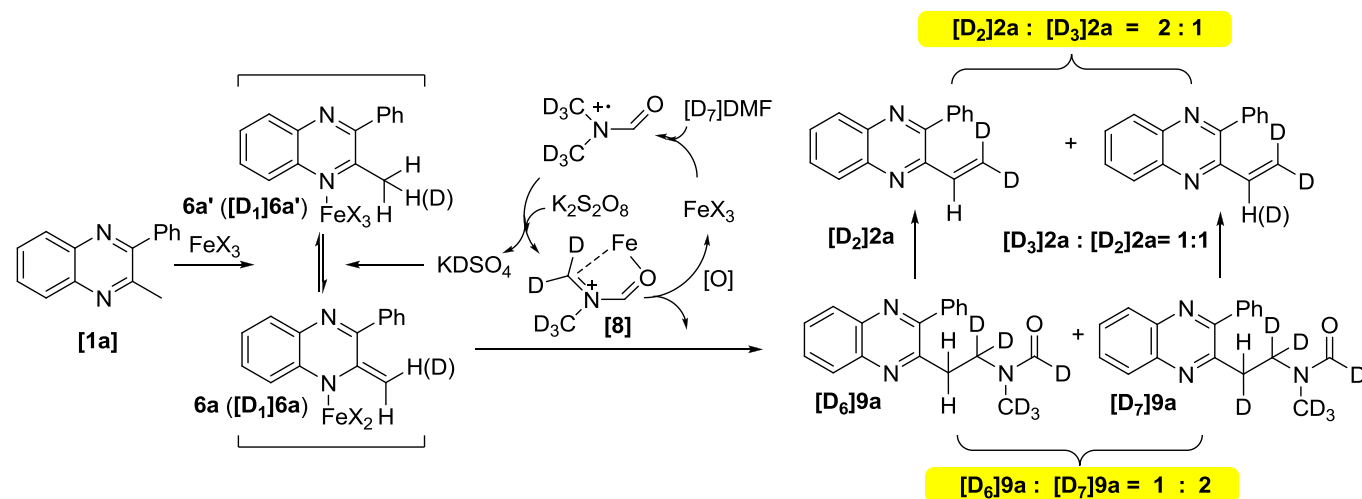

**Figure 3.** Deuterated experiments

(c) Competing reaction between **[D<sub>7</sub>]**DMF and DMF

**1a** (0.2 mmol),  $\text{FeCl}_3 \cdot 6\text{H}_2\text{O}$  (1.1 mg, 0.004 mmol),  $\text{K}_2\text{S}_2\text{O}_8$  (108 mg, 0.4 mmol) and **[D<sub>7</sub>]** DMF / DMF (0.6 mL / 0.6 mL) were sequentially added to a 10-mL tube under air. Then the tube was sealed and stirred at 110 °C for 3 h. Upon completion (monitored by TLC), the resulting mixture was diluted with  $\text{Et}_2\text{O}$  (15 mL) and washed by brine (10 mL  $\times$  3). The organic layer was then dried over  $\text{Na}_2\text{SO}_4$ , filtered and evaporated in *vacuo*, the residue was purified by column chromatography on silica gel (100-200 mesh) using petroleum ether-EtOAc as eluent. A mixture of **[D<sub>2</sub>]**2a, **[D<sub>3</sub>]**2a and **2a** was determined on the basis of  $^1\text{H}$  NMR analysis. Based on the integrations related to different hydrogen resonances, the kinetic isotope effect is calculated to be  $k_{\text{H}}/k_{\text{D}} \approx 2.0$ , suggesting that the C-H bond cleavage of N, N-dimethyl amides is involved in the rate-determining step. Notably, KIE value was also obtained when the reaction was stop at a lower conversion of 26%, the result was the same as it obtained after full conversion.

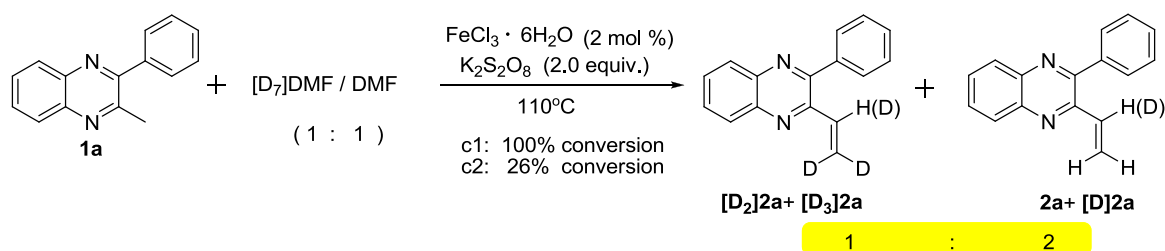

**Scheme 3.** Competing reaction between **[D<sub>7</sub>]**DMF and DMF

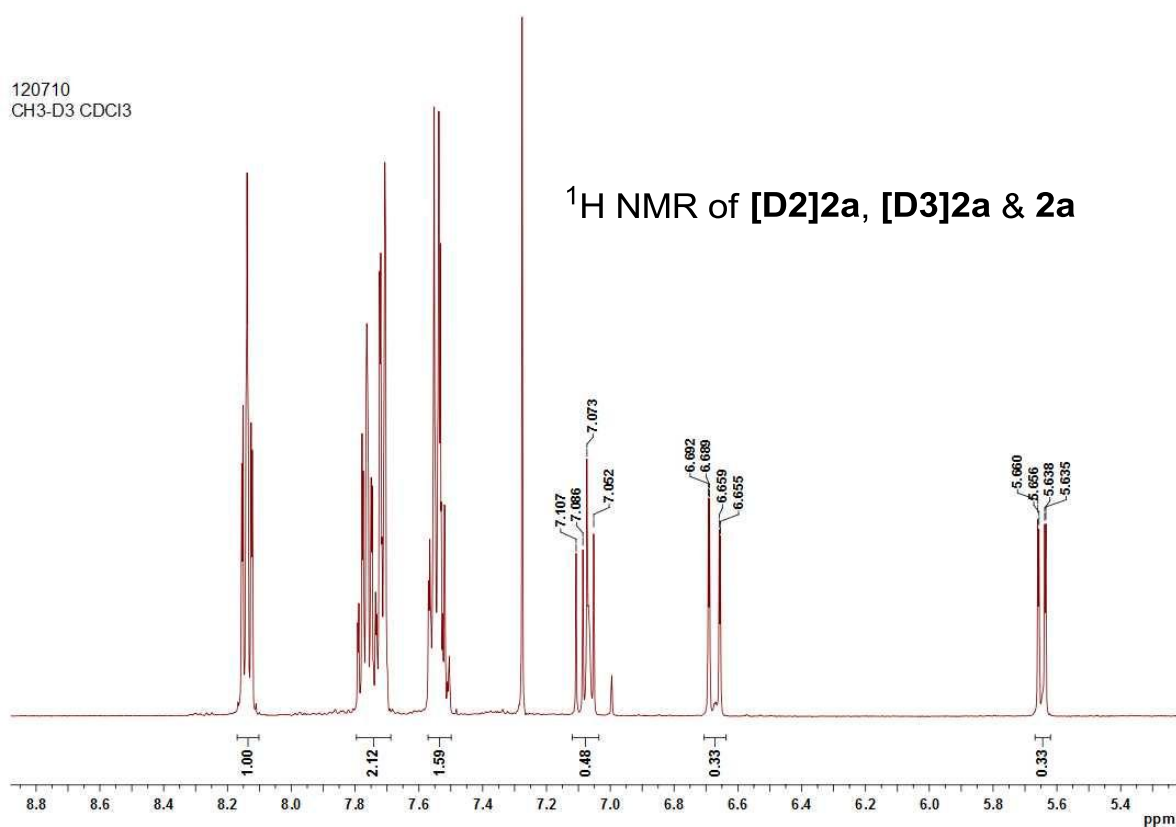

**Figure 4.** <sup>1</sup>H NMR spectra of KIE experiment (c1: 100% conversion of **1a**)

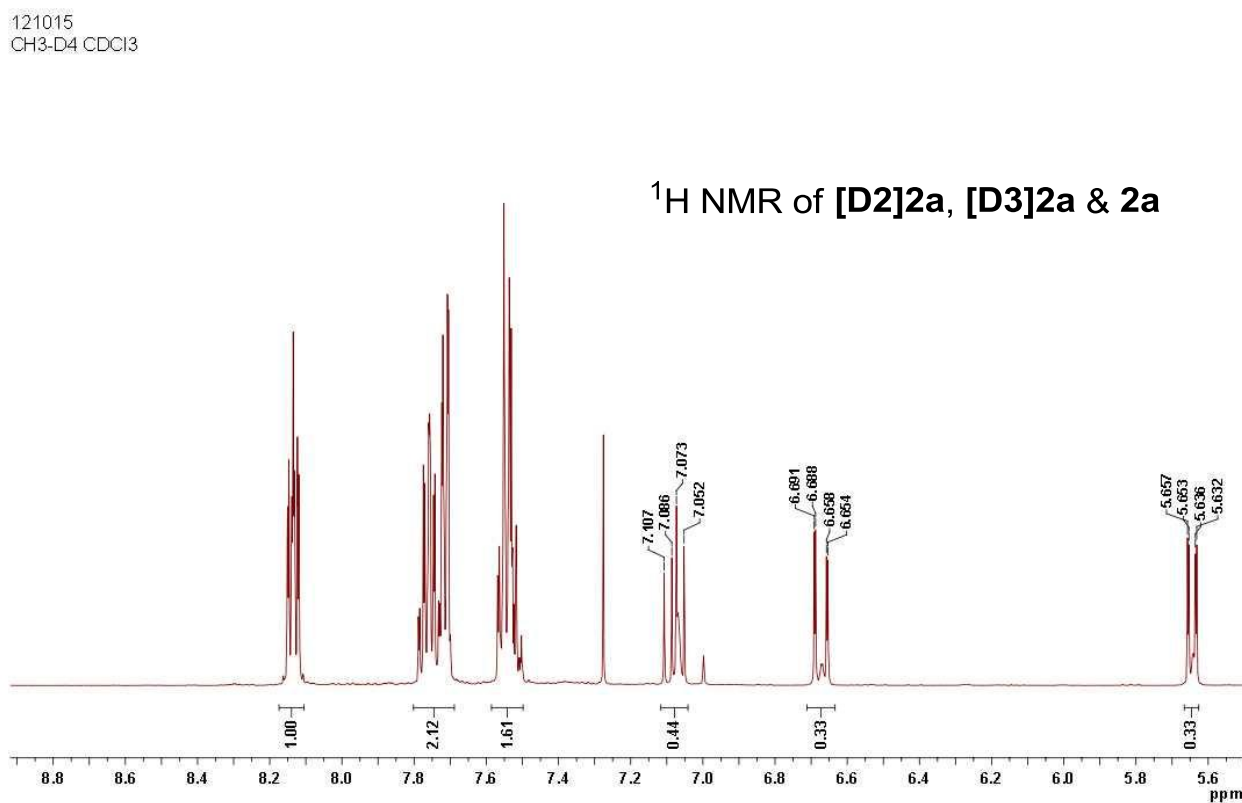

**Figure 5.** <sup>1</sup>H NMR spectra of KIE experiment (c2: 26% conversion of **1a**)

### ESI-MS studies to capture the coupling intermediate

**1a** (0.2 mmol),  $\text{FeCl}_3 \cdot 6\text{H}_2\text{O}$  (1.1 mg, 0.004 mmol),  $\text{K}_2\text{S}_2\text{O}_8$  (108 mg, 0.4 mmol) and DMA (1.5 mL) were sequentially added to a 10-mL tube under air. Then the tube was sealed and stirred at 110 °C. The mixture was stopped heating and cooled to room temperature when almost half of the starting material **1a** was converted to vinylation product **2a** (monitored by TLC). Then the mixture was diluted by methanol and subjected directly to ESI-MS analysis. From the mass spectrum we could find the starting material **1a** ( $m/z$ : 221) and the product **2a** ( $m/z$ : 233). Notably, the coupling intermediate between **1a** and N,N-dimethylacetamide (DMA) was detected ( $m/z$ : 306) and its structure was further confirmed by accurate mass data. The mass experiment result indicated that a key intermediate coupled between the substrate **1a** and DMA was generated during the process, which then underwent a tandem elimination to give the final vinylation product **2a**.

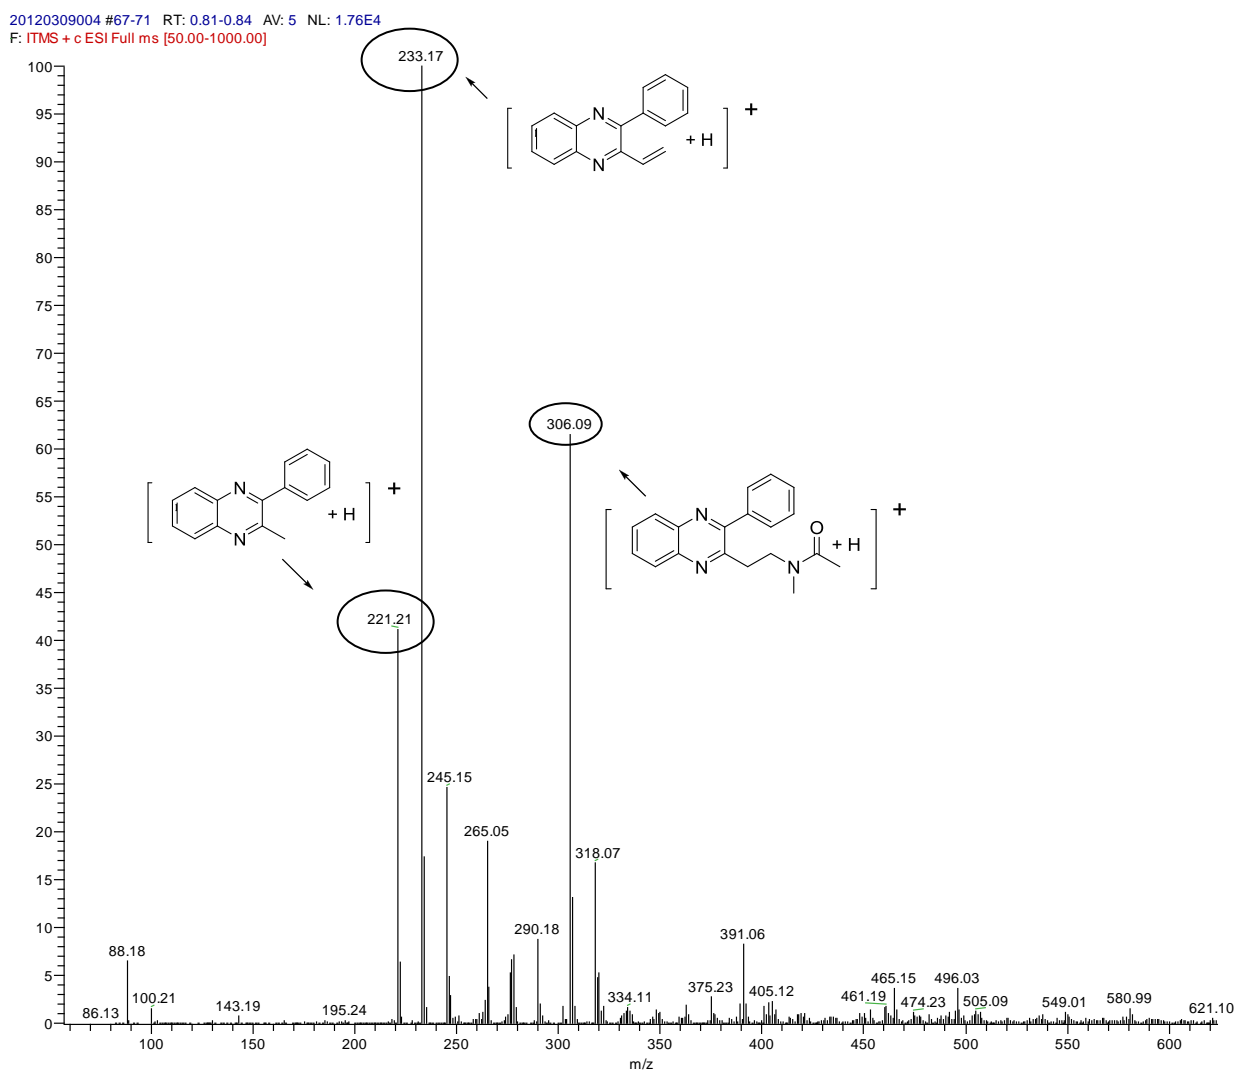

Figure 6. ESI-MS spectrum.

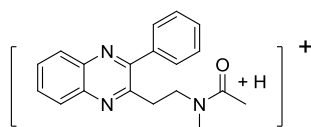

| Ion Formula                                      | m/z (measured) | m/z (calculated) | Diff (ppm) | DBE  |
|--------------------------------------------------|----------------|------------------|------------|------|
| C <sub>19</sub> H <sub>20</sub> N <sub>3</sub> O | 306.1598       | 306.1606         | 2.61       | 11.5 |

## References

- [1] B. Das, K. Venkateswarlu, K. Suneel, A. Majh. *Tetrahedron Lett.* **2007**, 48, 5371.
- [2] J. S. Yadav, B. V. S. Reddy, K. Premalatha, K. S. Shankar. *Synthesis* **2008**, 3787.
- [3] D. P. Singh, S. K. Deivedi, S. R. Hashim, R. G. Singhal. *Pharmaceuticals* **2010**, 3, 2416.
- [4] E. J. Campbell, C. M. Hewitt, P. Jones, L. H. Xie. WO 2011150156.
- [5] B. S. P. Anil Kumar, B. Madhav, K. Harsha Vardhan Reddy, Y. V. D. Nageswar. *Tetrahedron Lett.* **2011**, 52, 2862.
- [6] A. Ohta, S. Masano, S. Iwakura, A. Tamura, H. Watahiki, M. Tsutsui, Y. Akita, T. Watanabe, T. Kurihara. *J. Heterocycl. Chem.* **1982**, 19, 465.
- [7] M. R. Akula, M.W. Wolowyk, E. E. Knaus. *Org. Pre. Pro. Int.* **1991**, 3, 386.
- [8] A. C. Shaikh, C. Chen. *Bio. Med. Chem. Lett.* **2010**, 20, 3664.
- [9] P. Beak, A. Basha, B. Kokko, D. Loo. *J. Am. Chem. Soc.* **1986**, 108, 6016.
- [10] D. Kalyani, A. R. Dick, W. Q. Anani, M. S. Sanford. *Tetrahedron* **2006**, 62, 11483.
- [11] V. F. de Andrade-Neto, M. O. F. Goulart, J. F. da Silva Filho, M. J. da Silva, M. do Carmo F. R. Pinto, A. V. Pinto, M. G. Zalis, L. H. Carvalho, A. U. Krettli. *Bioorg. Med. Chem. Lett.* **2004**, 14, 1145.
- [12] H. E. French, Kern Sears. *J. Am. Chem. Soc.* **1948**, 70, 1279.
- [13] Masaaki Iwata, Hiroyoshi Kuzuhara. *Bull. Chem. Soc. Jpn.* **1985**, 5, 1609.

<sup>1</sup>H and <sup>13</sup>C NMR spectra of all products

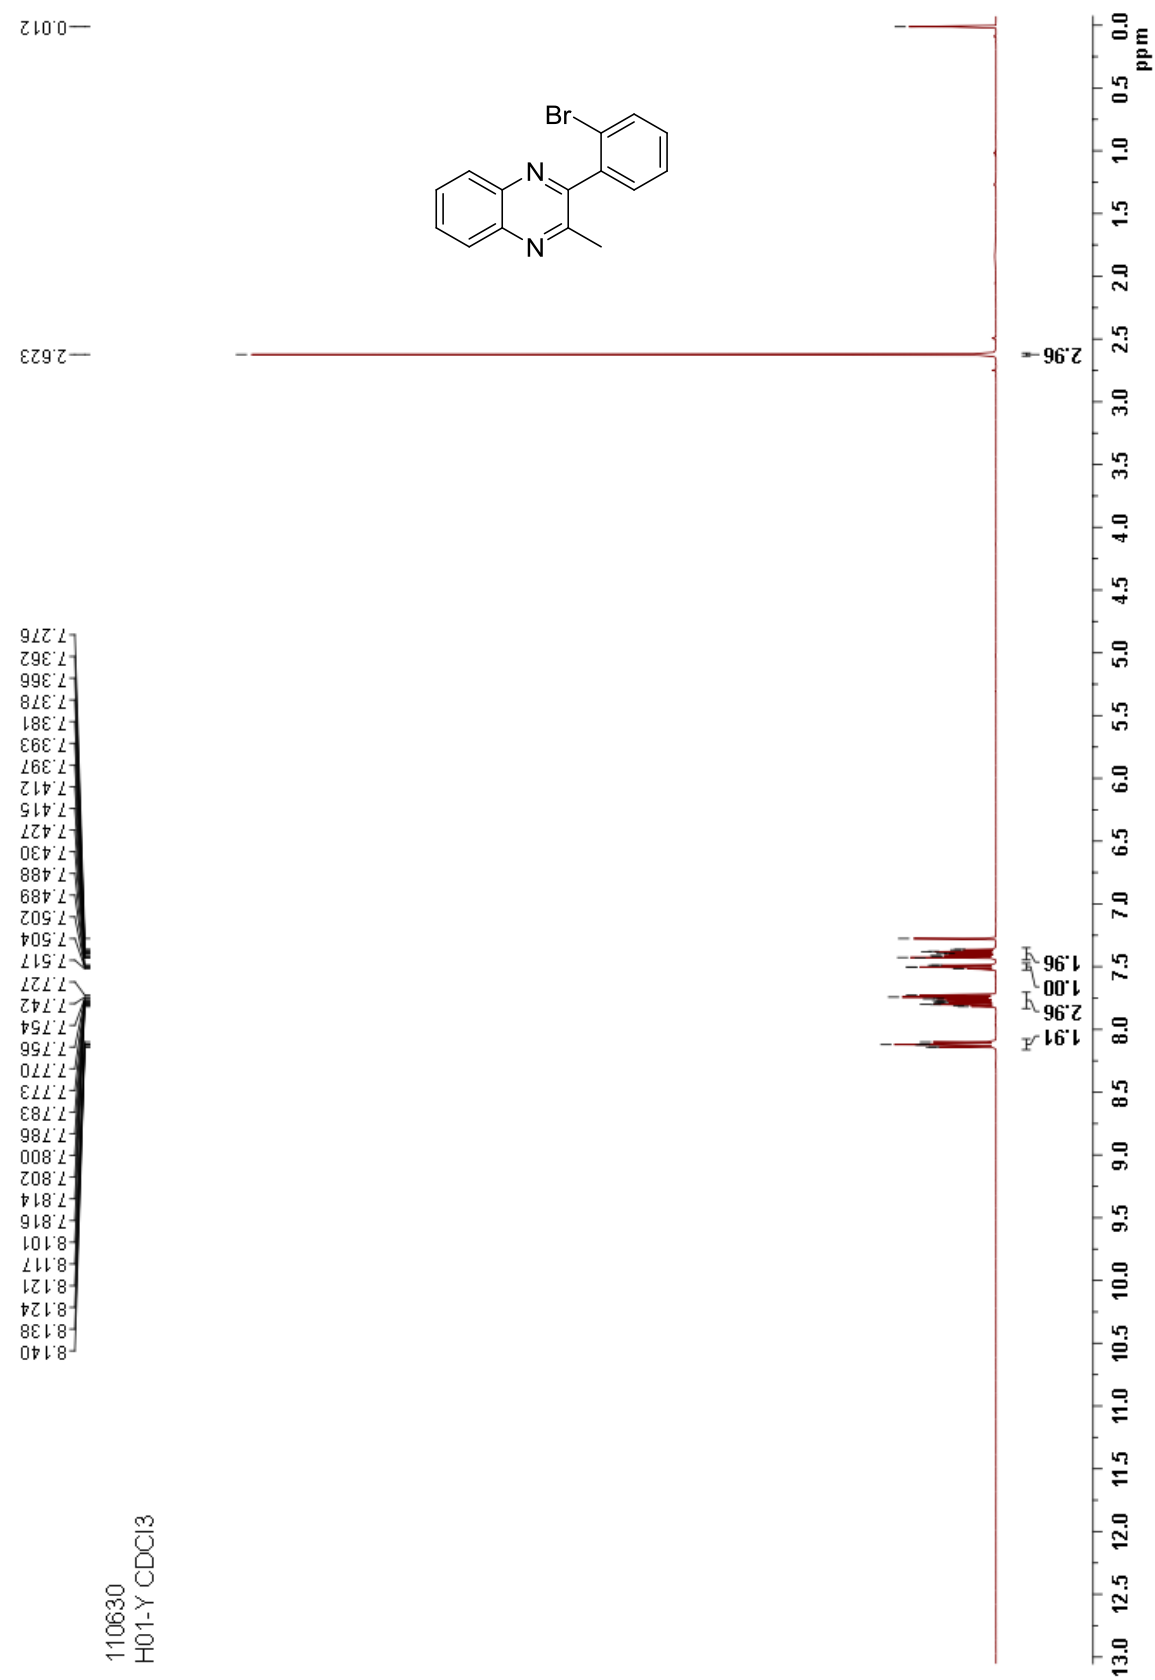



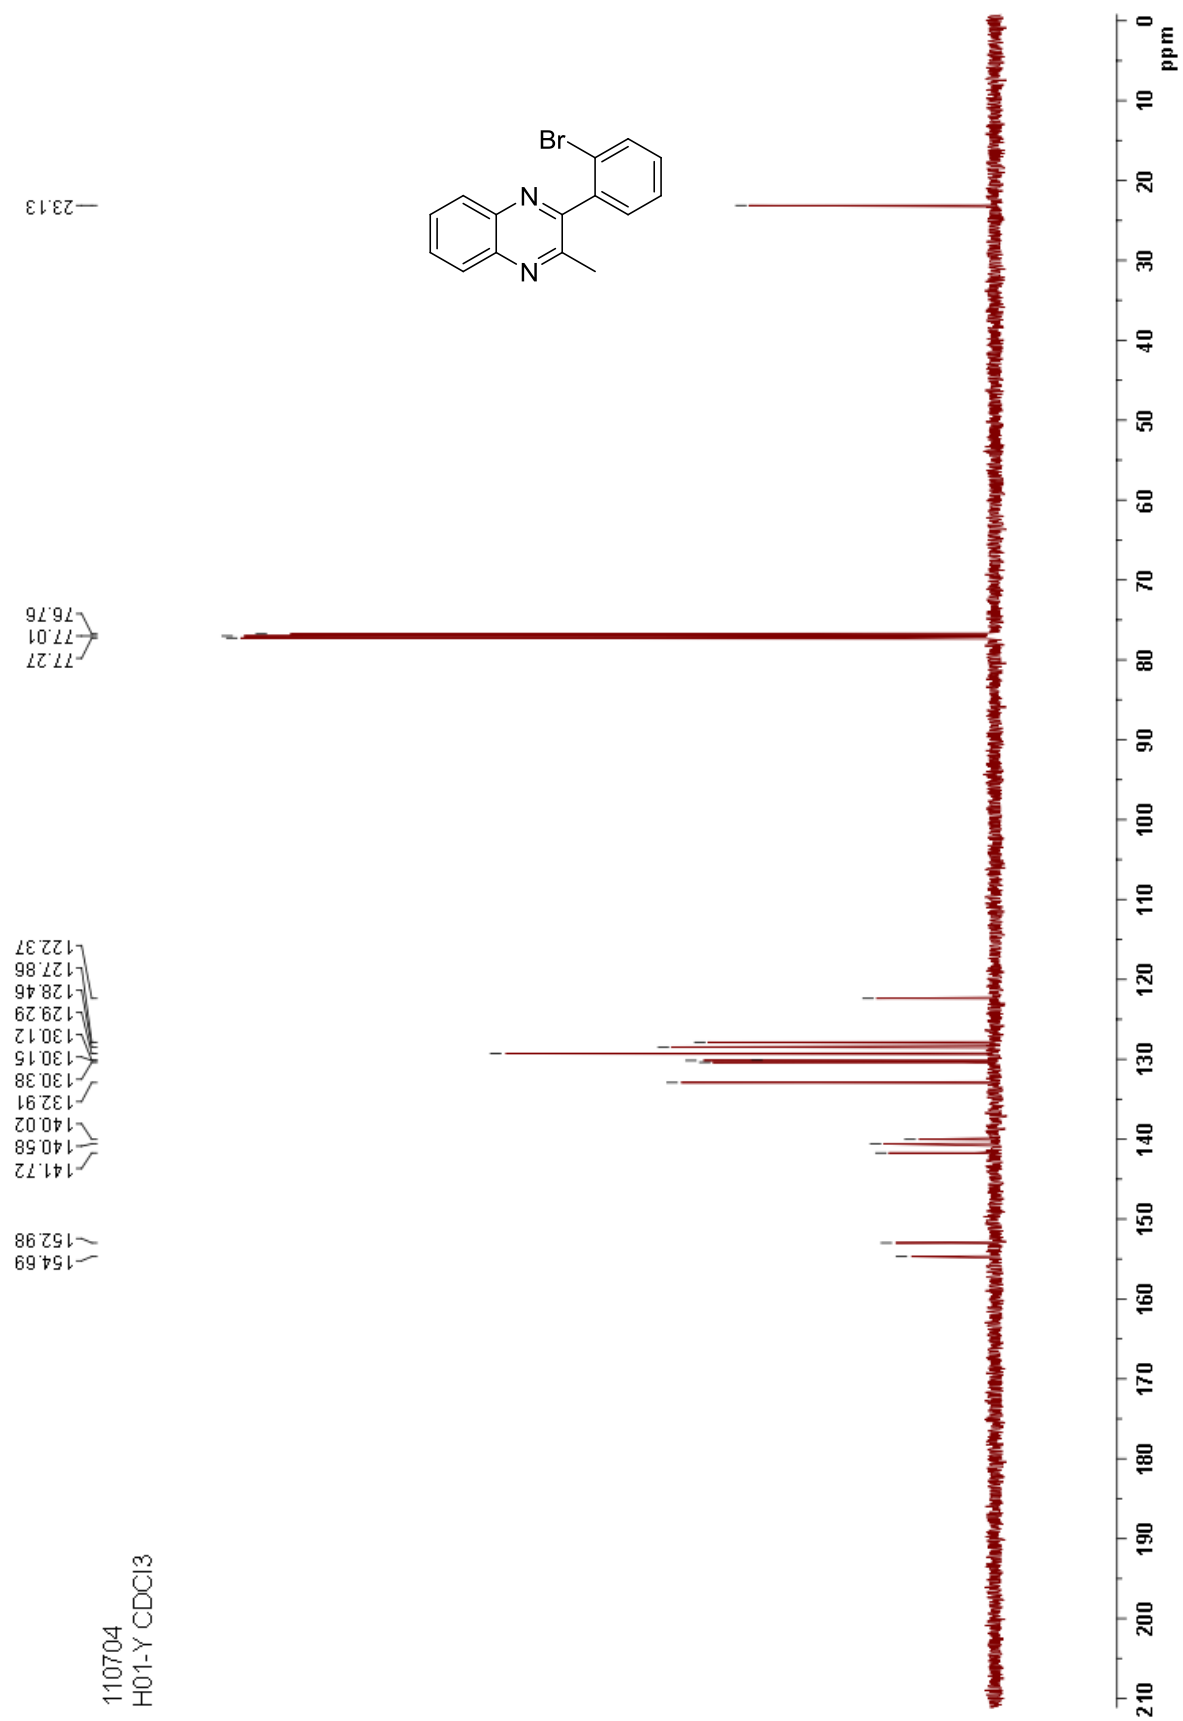

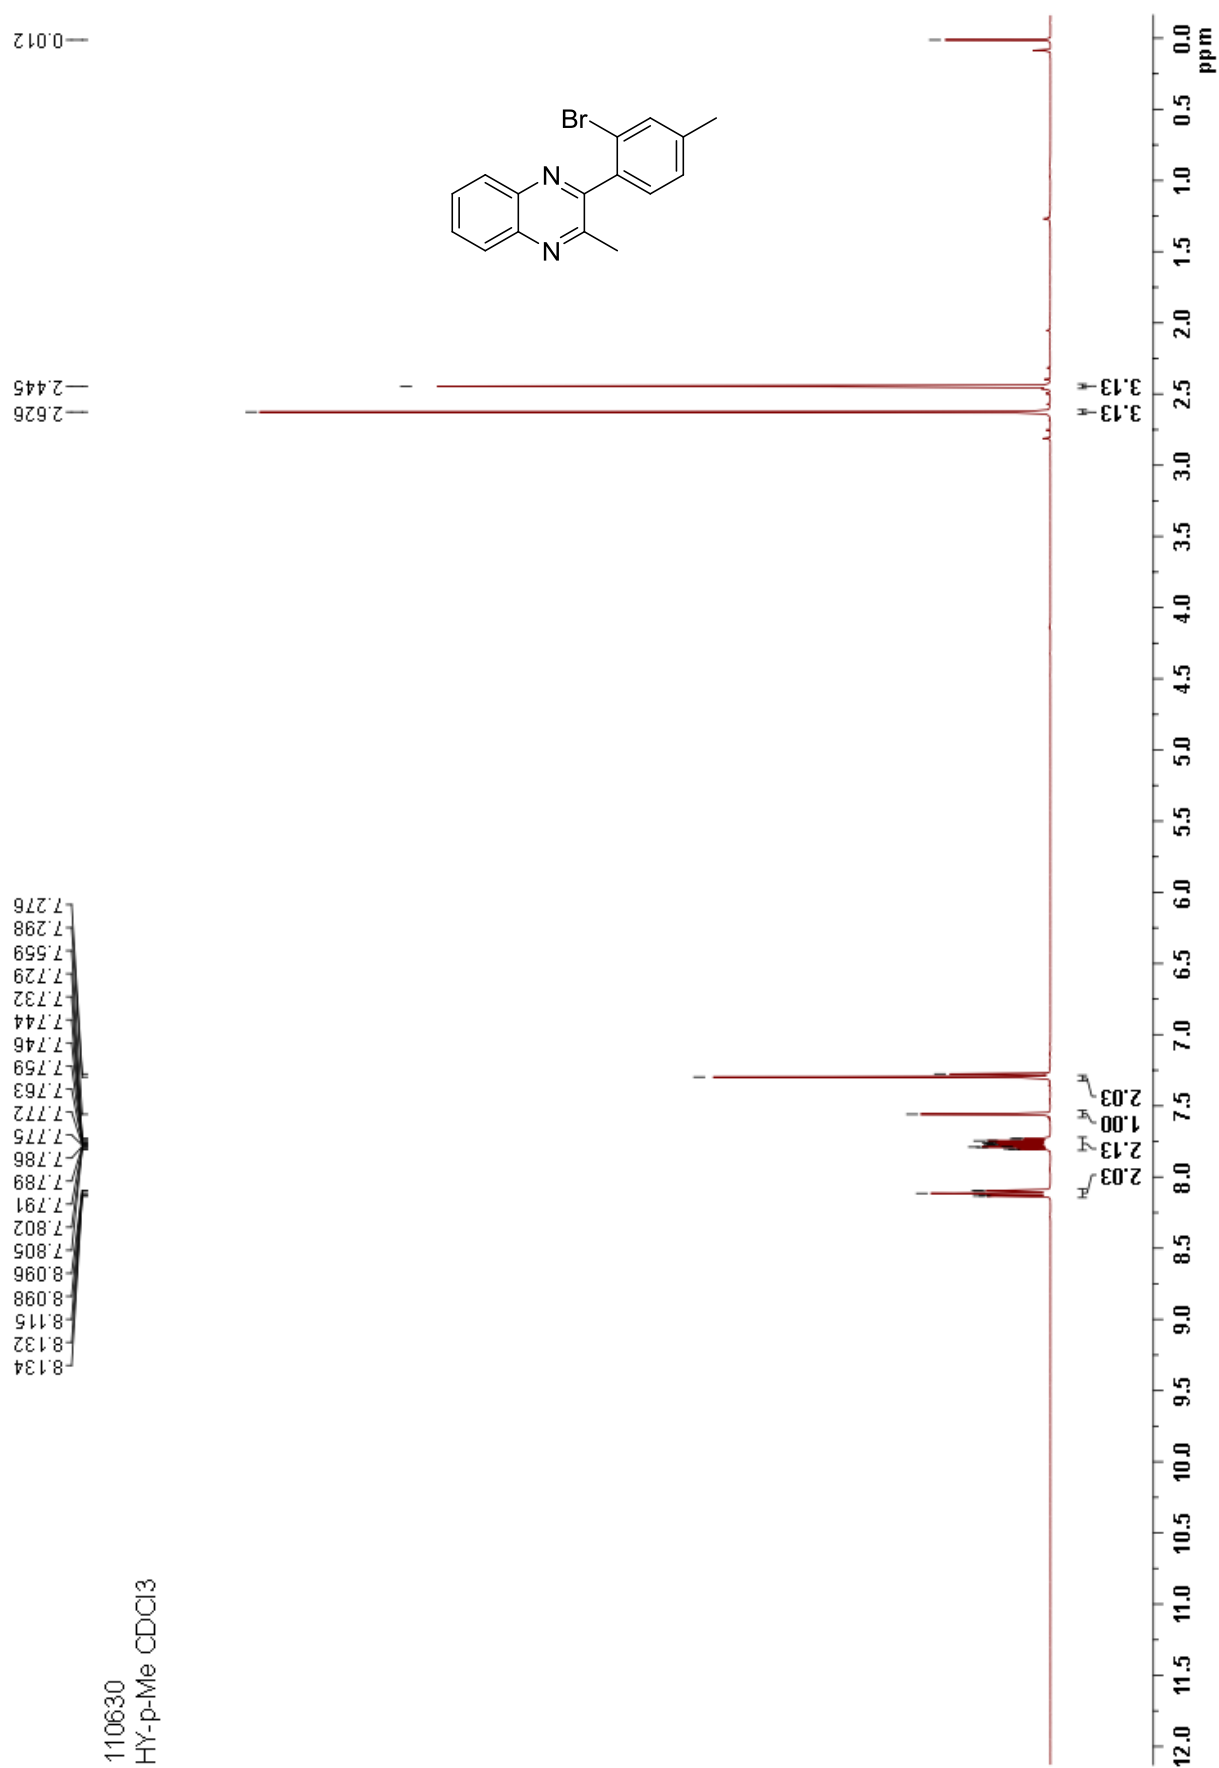

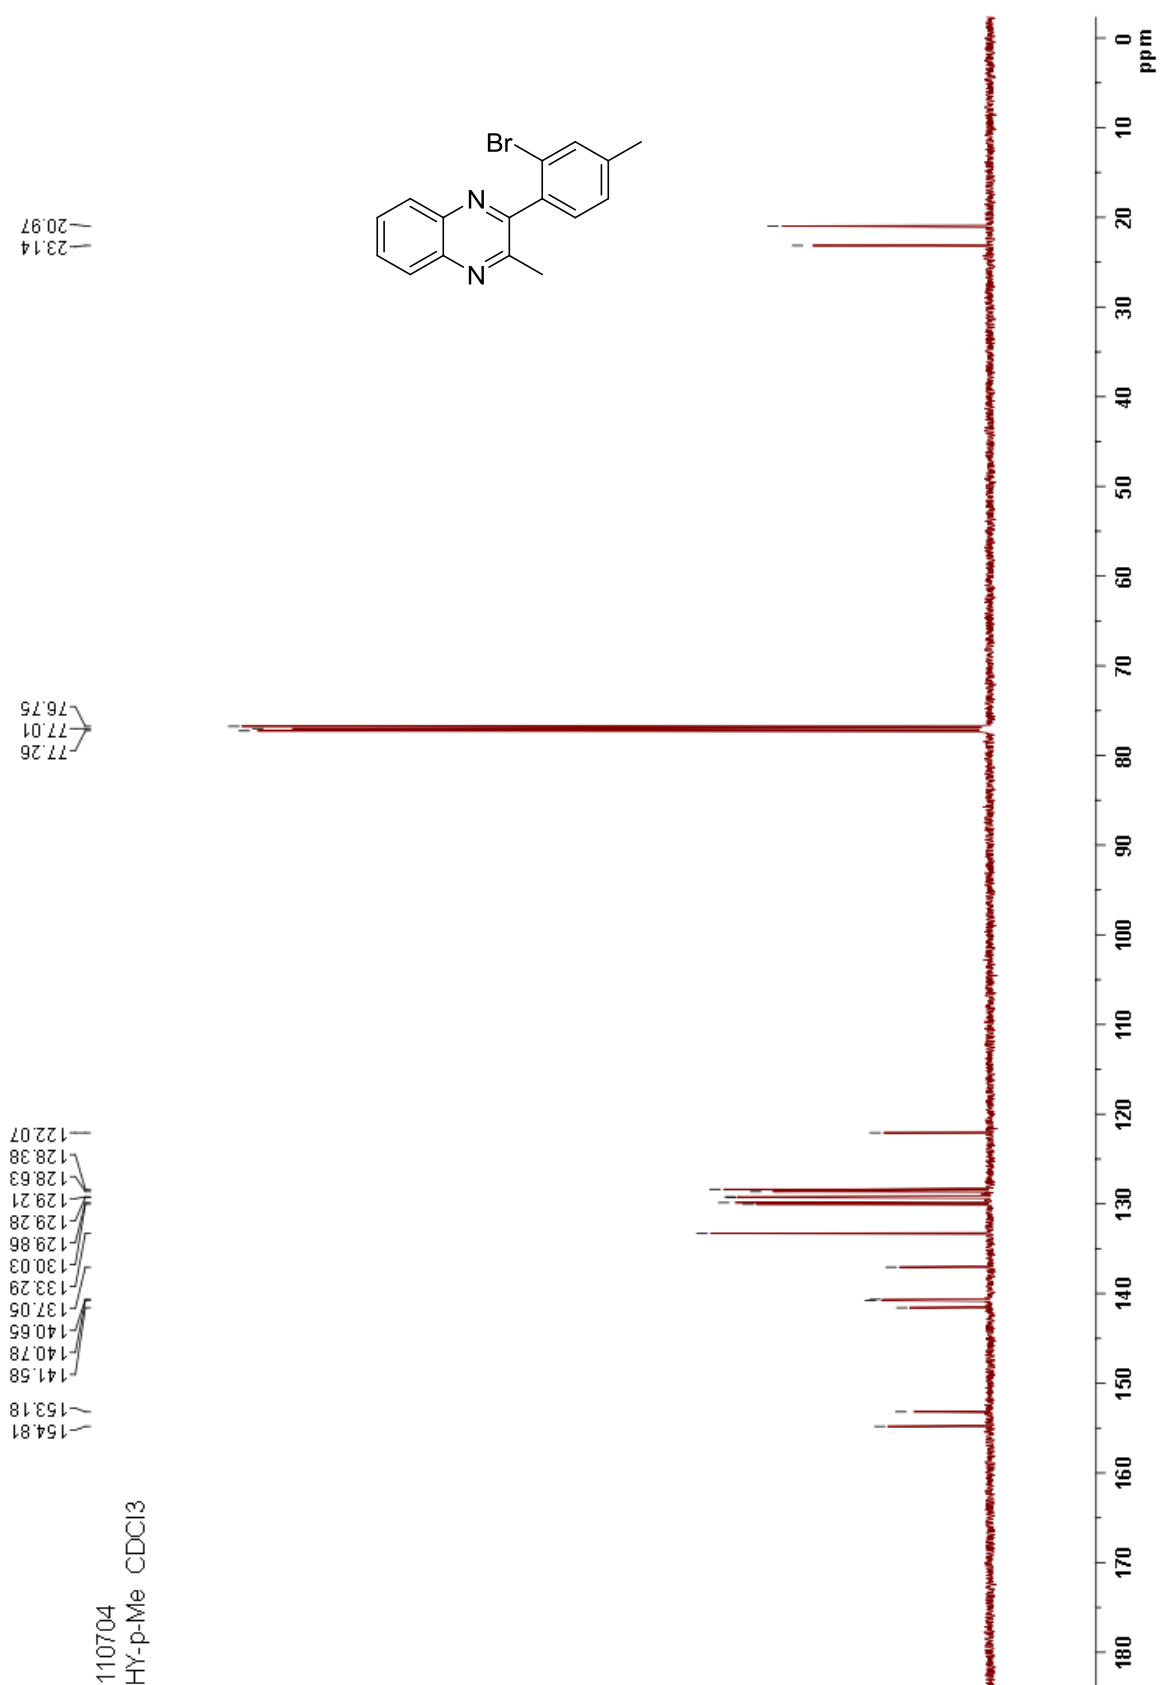

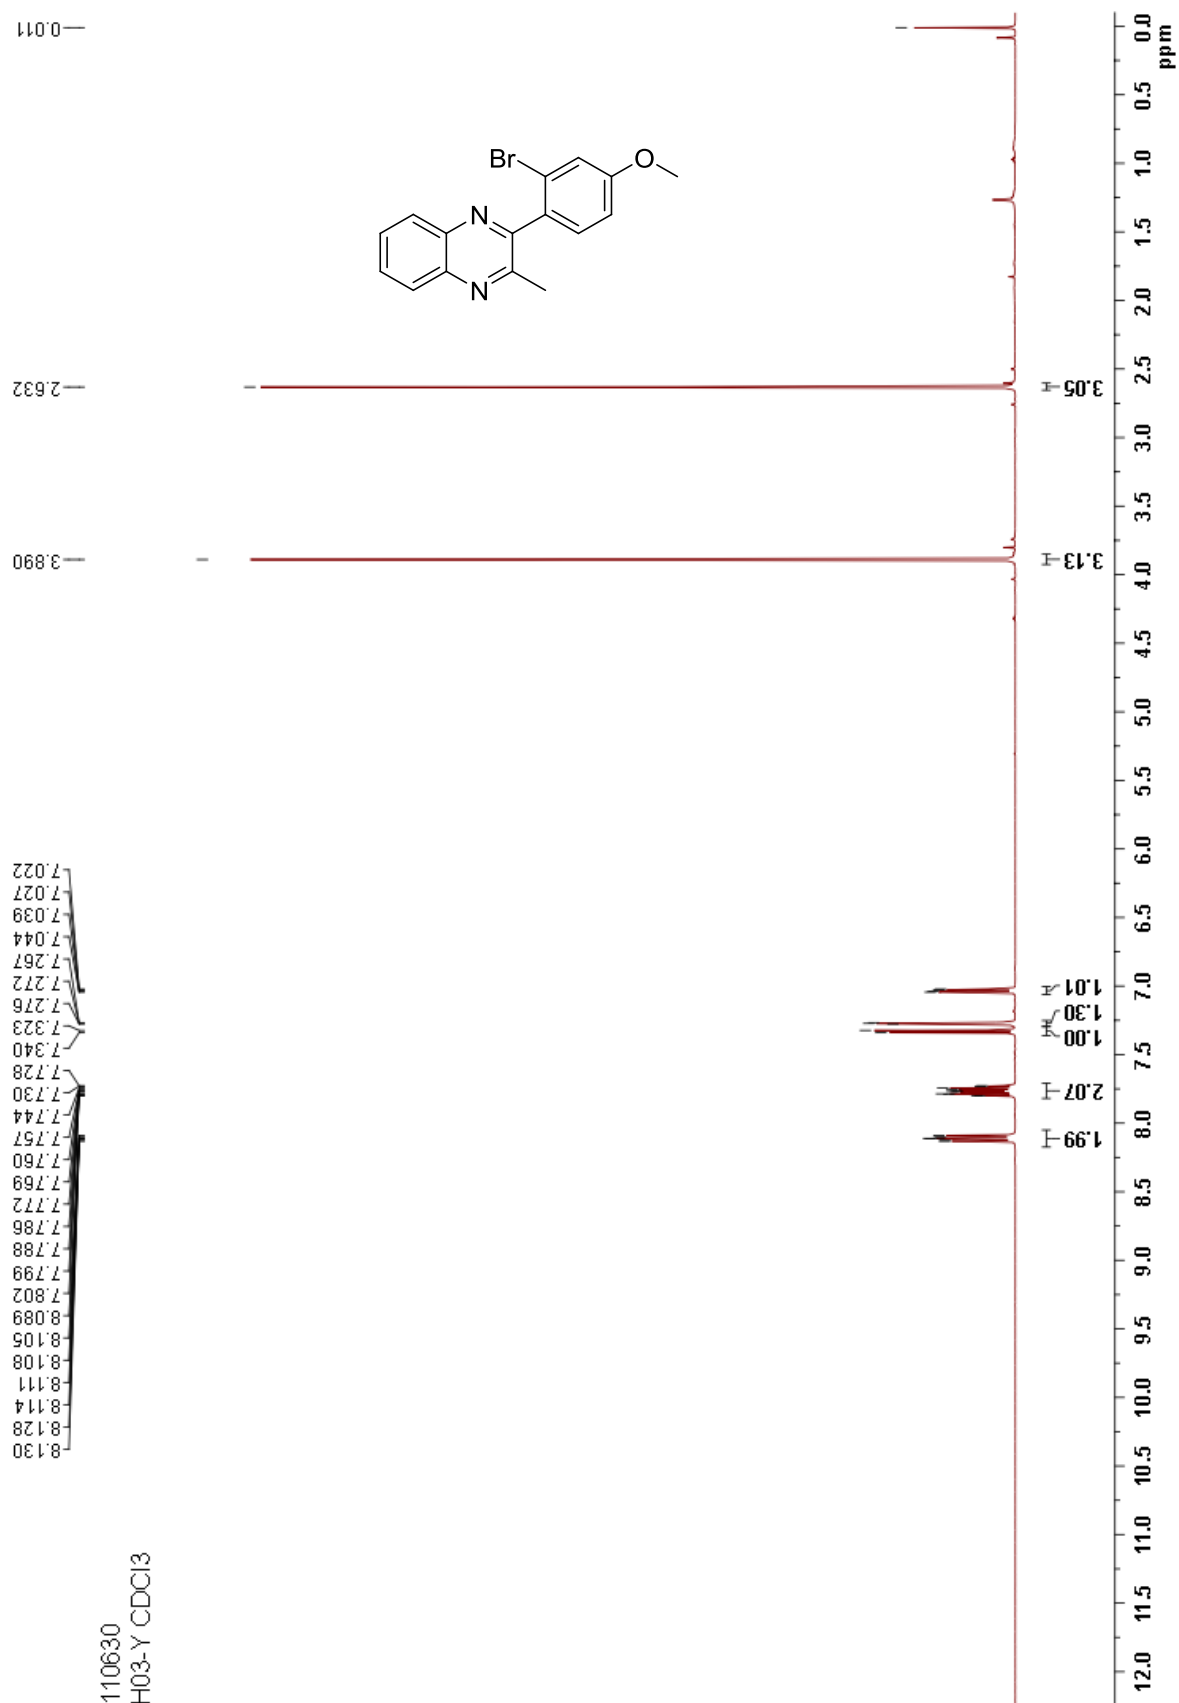

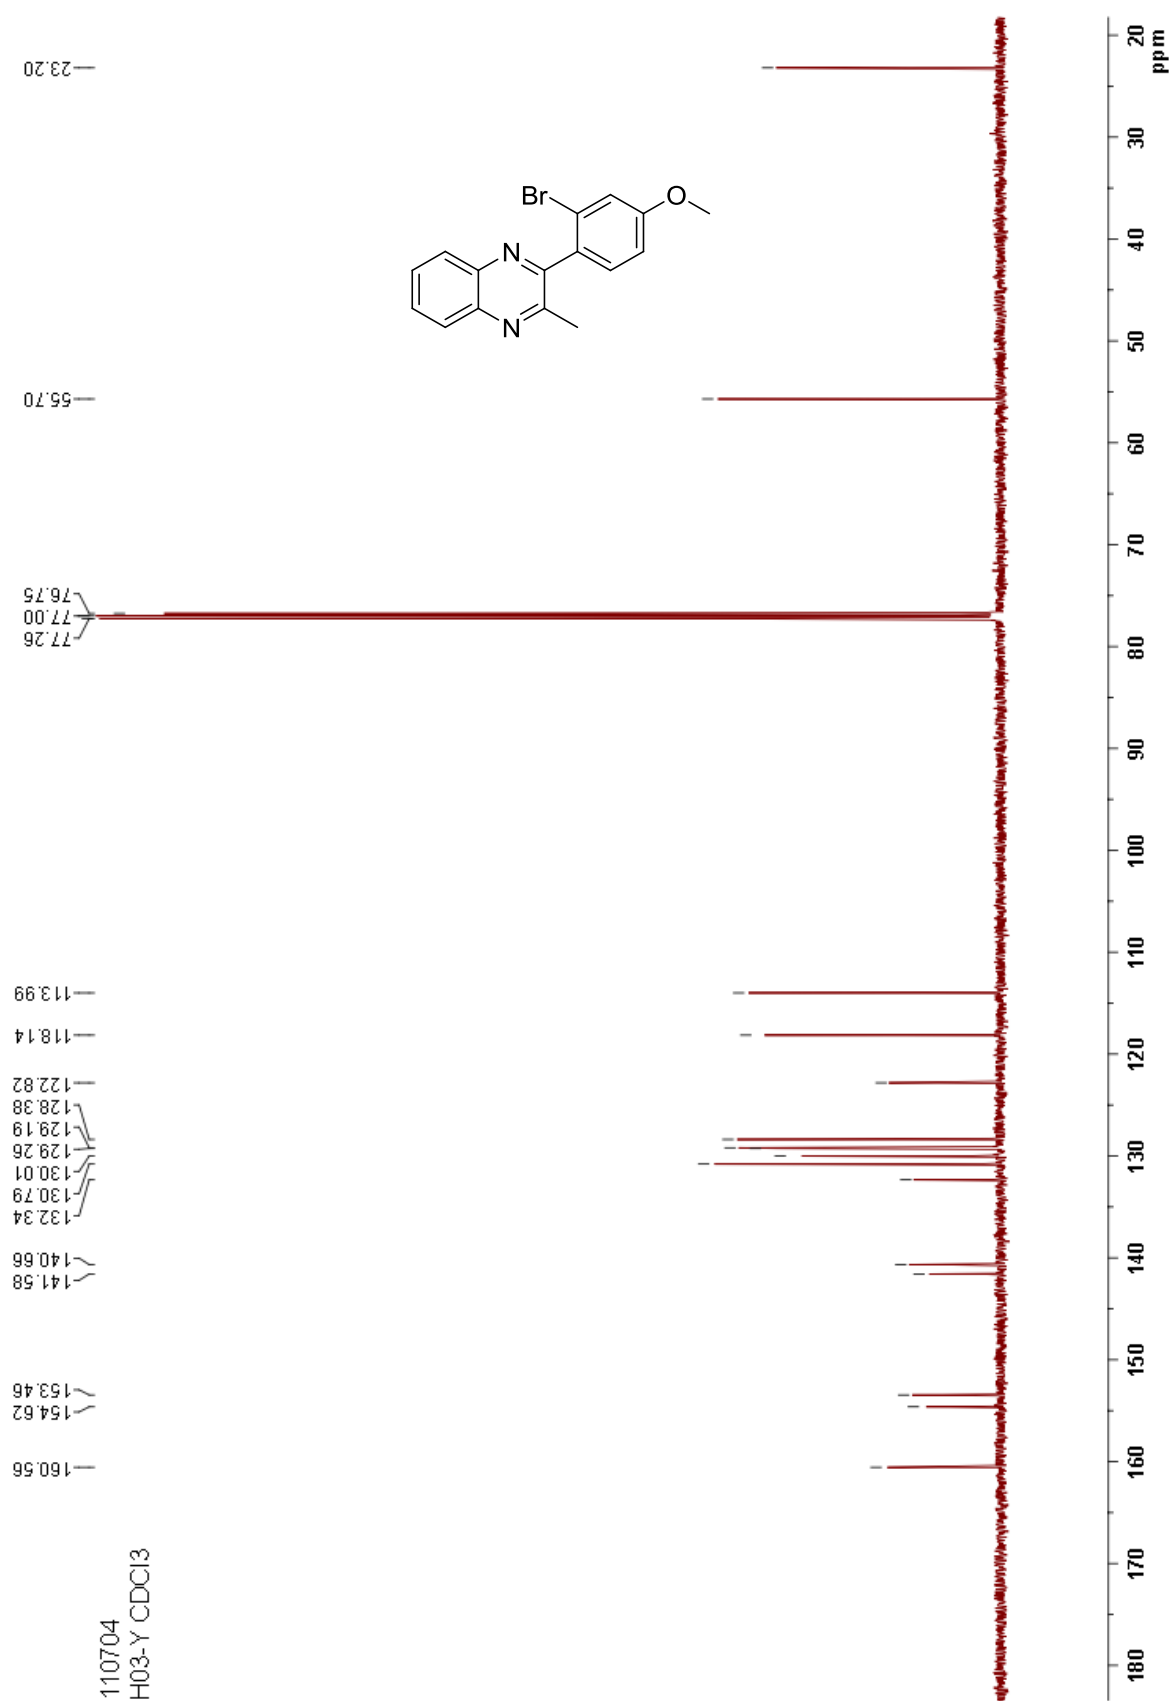

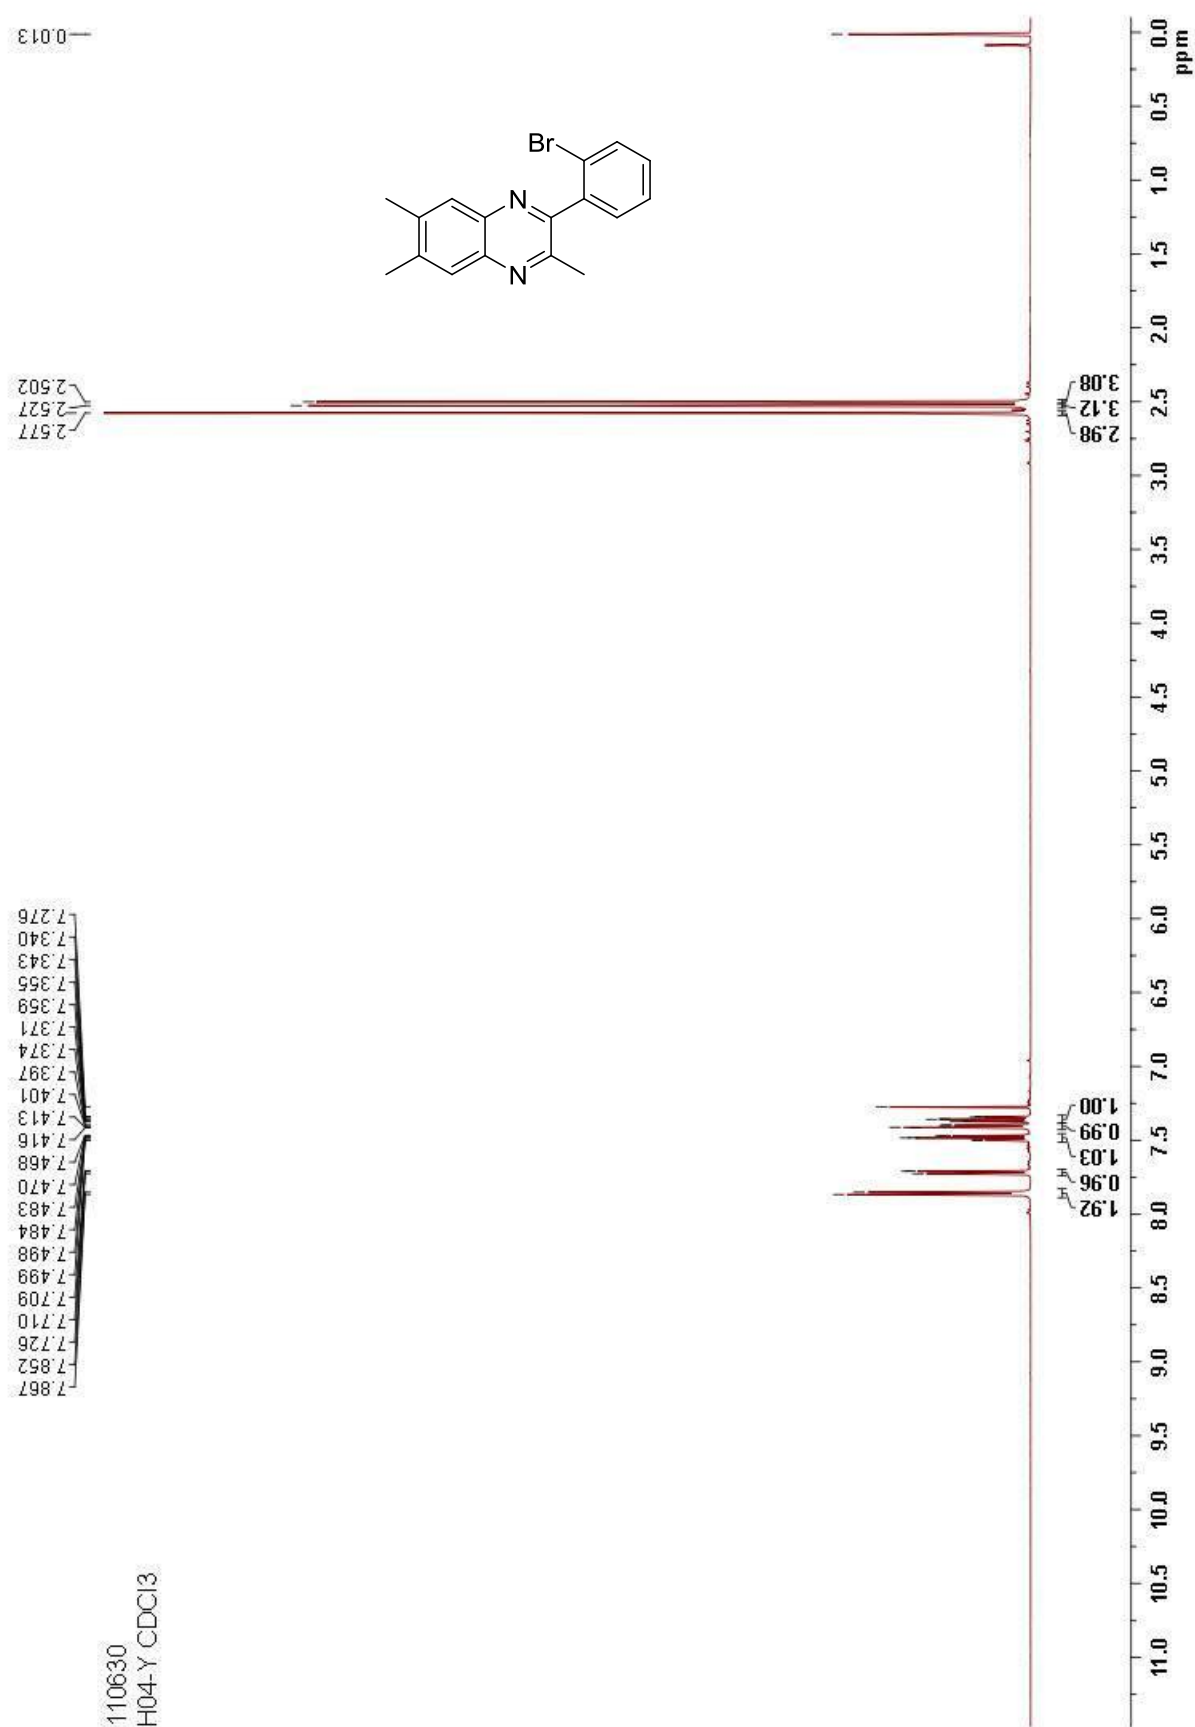

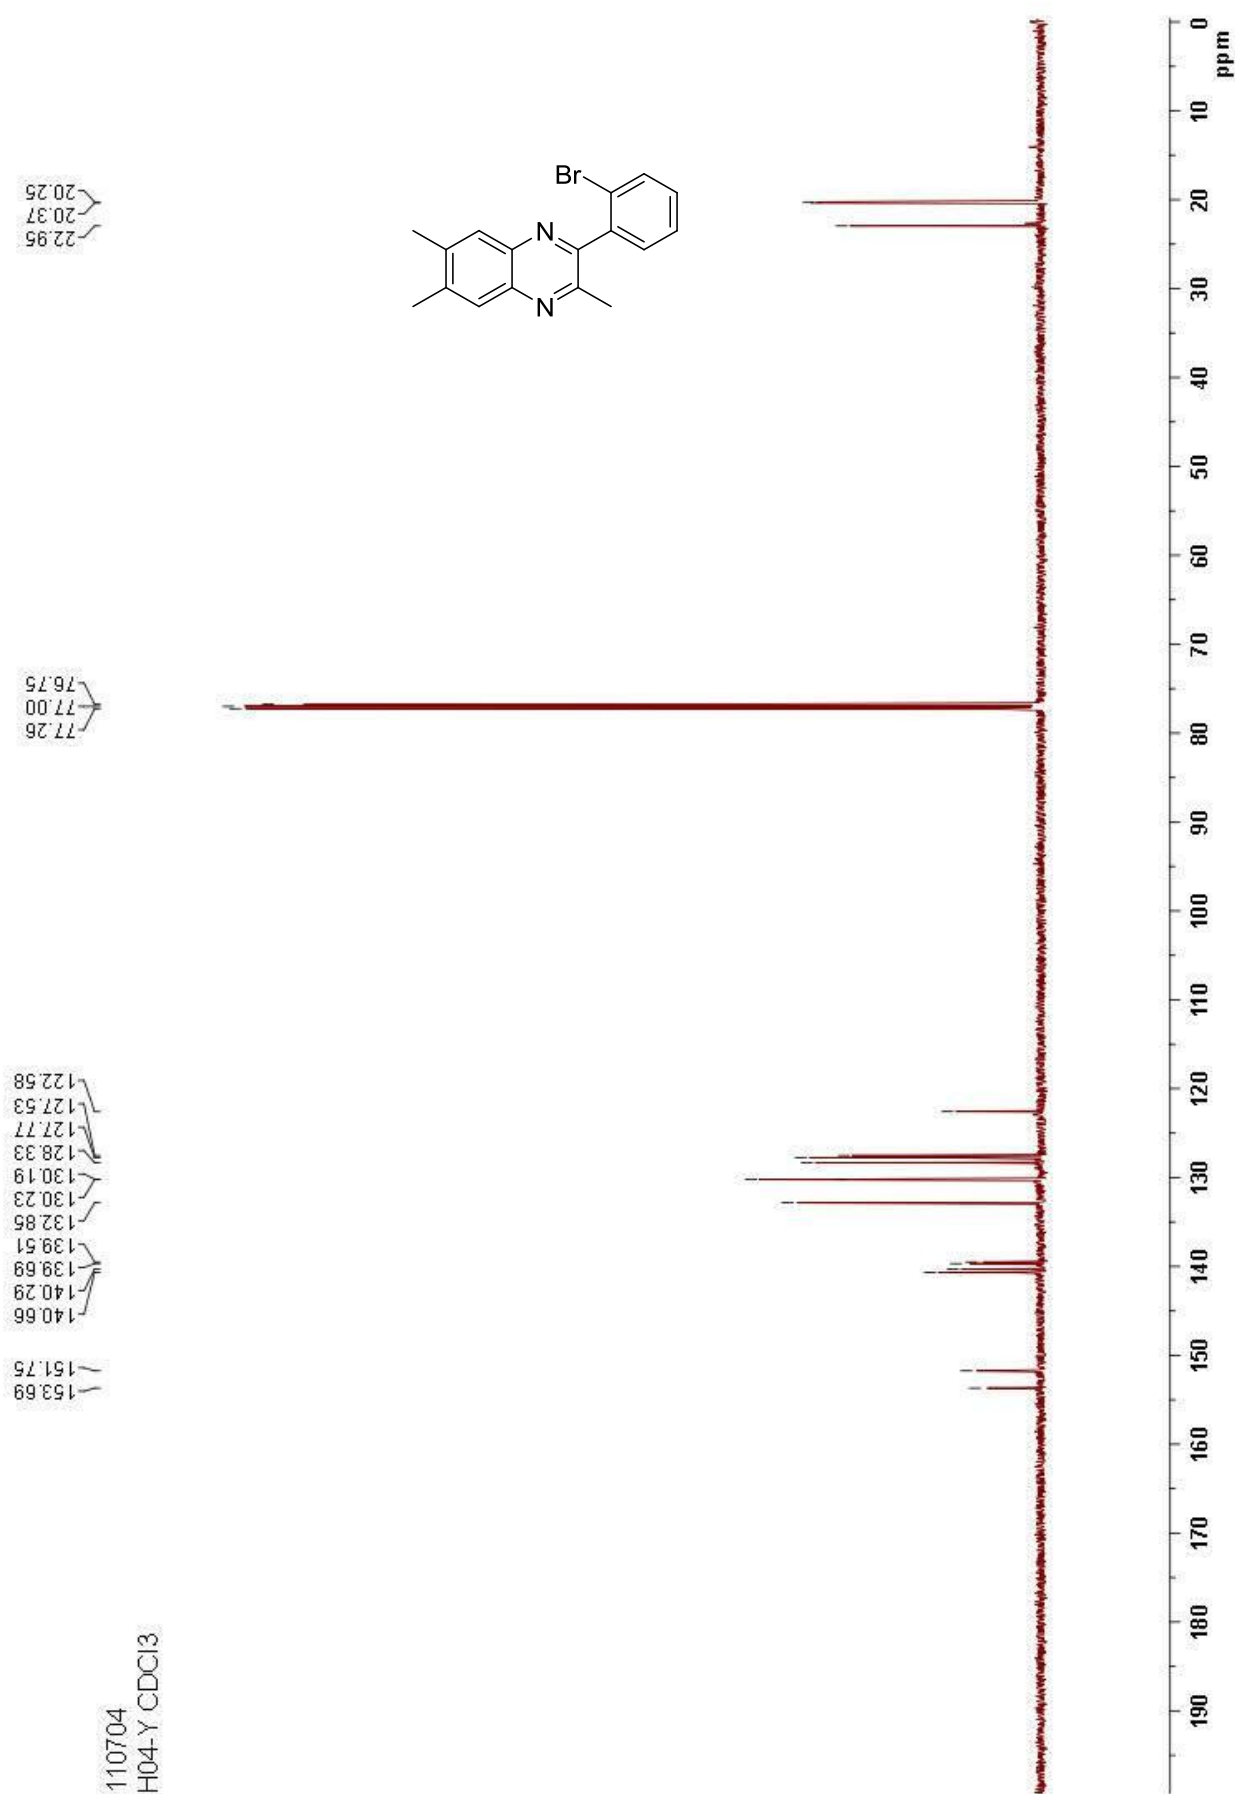

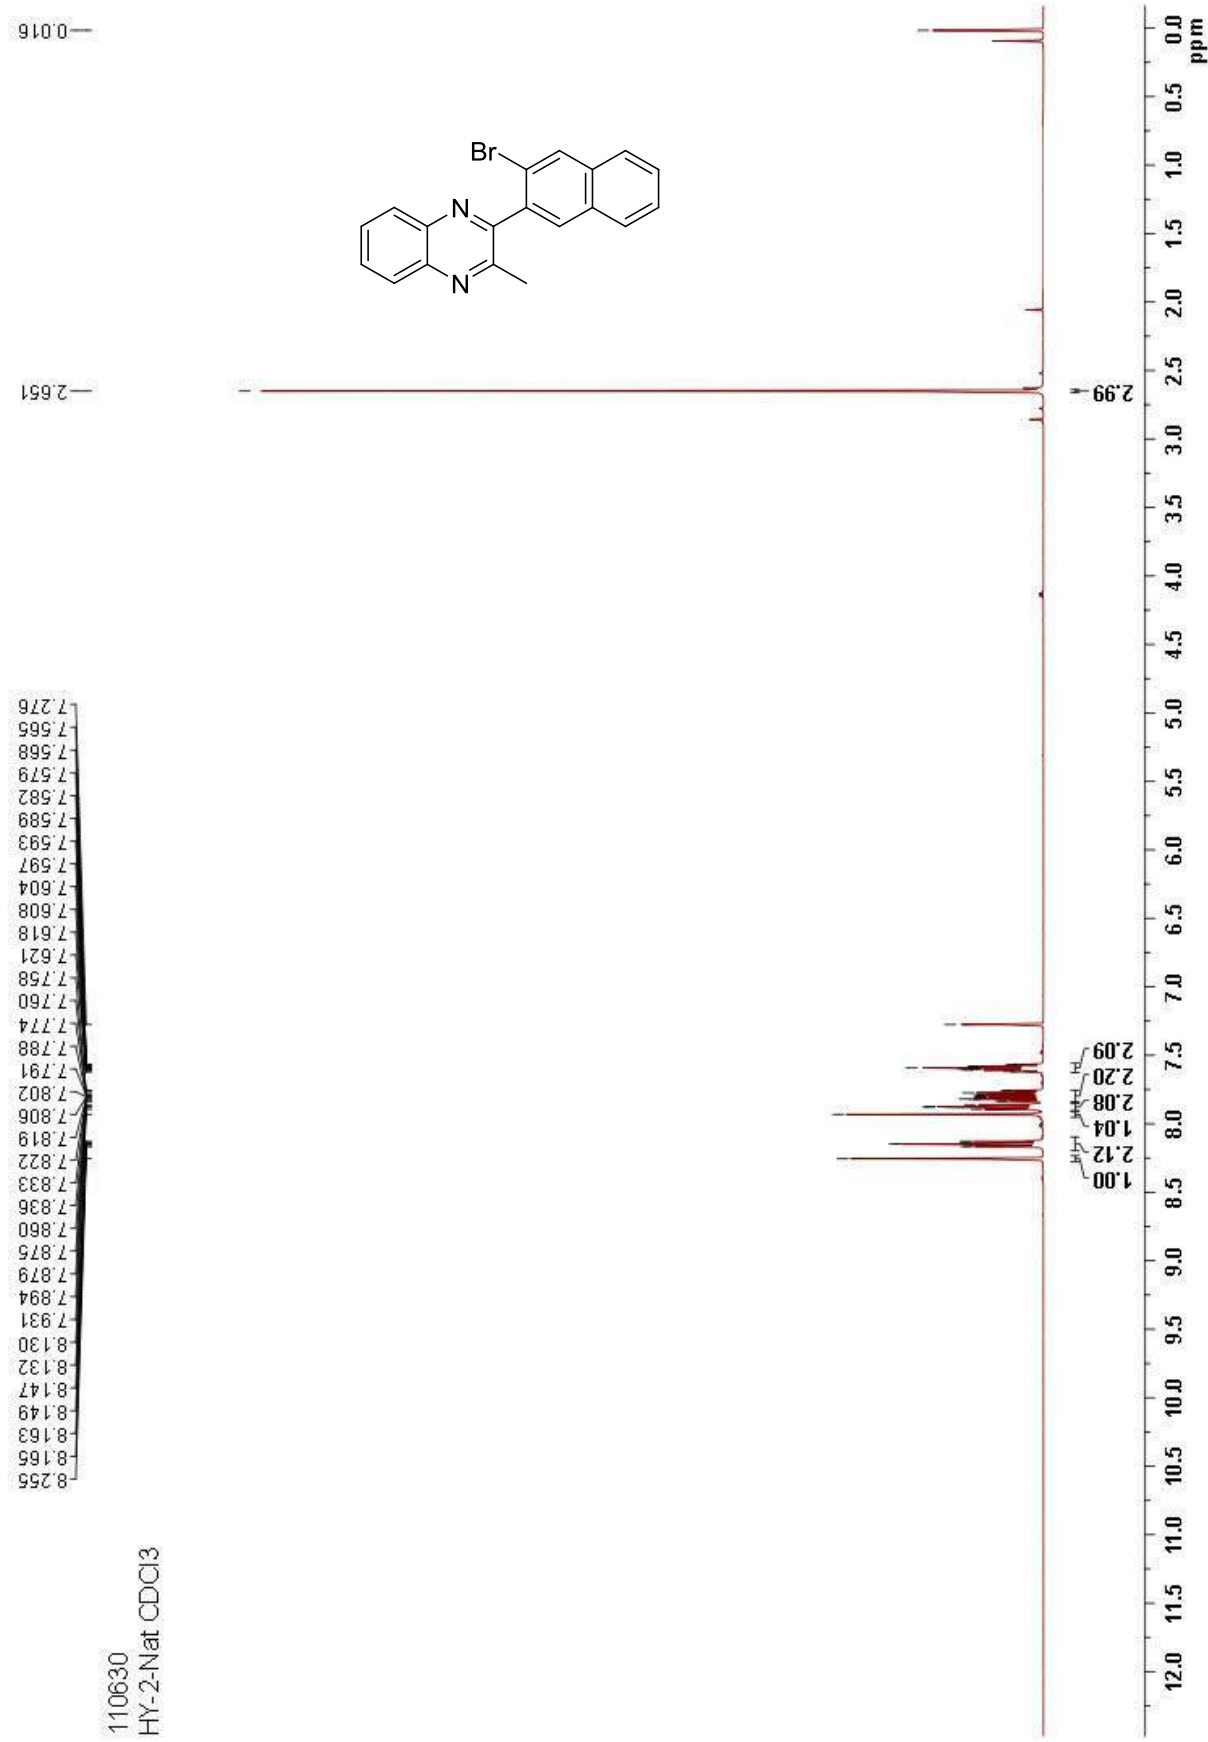



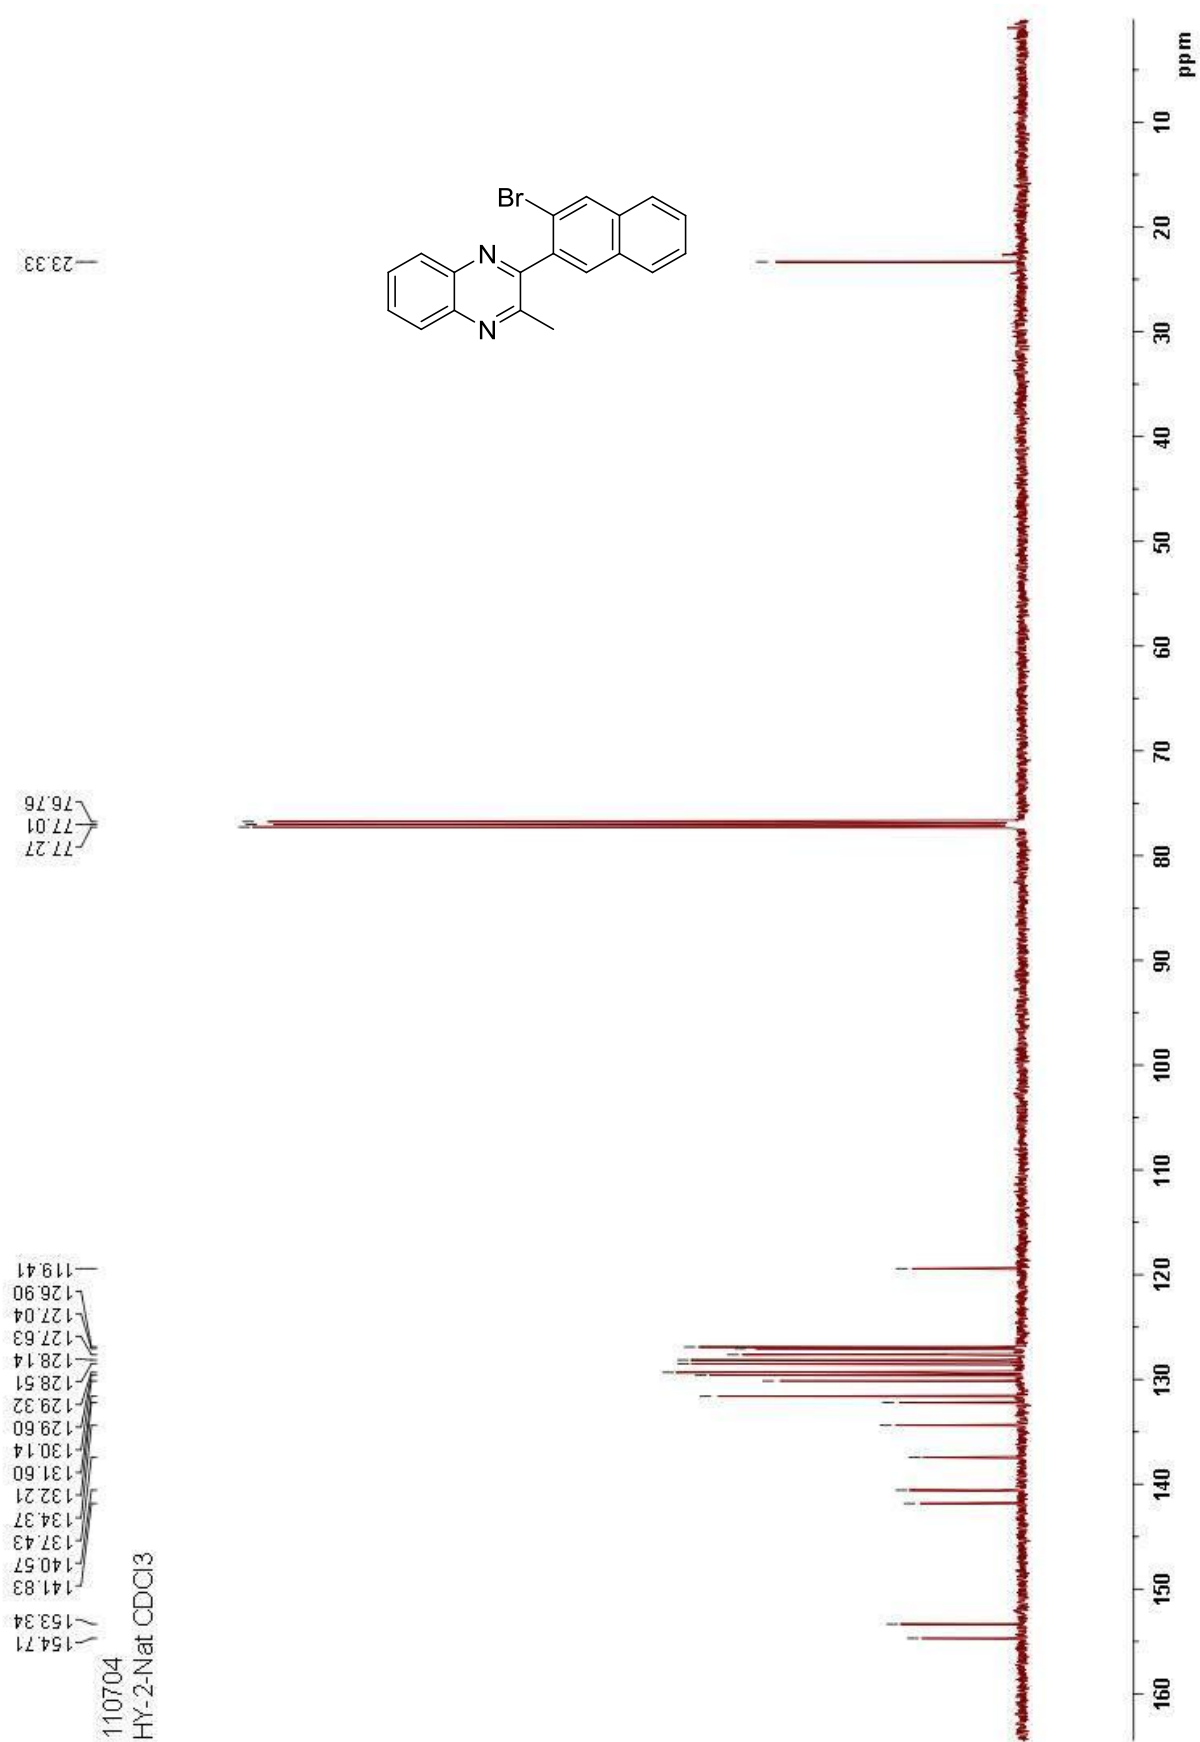

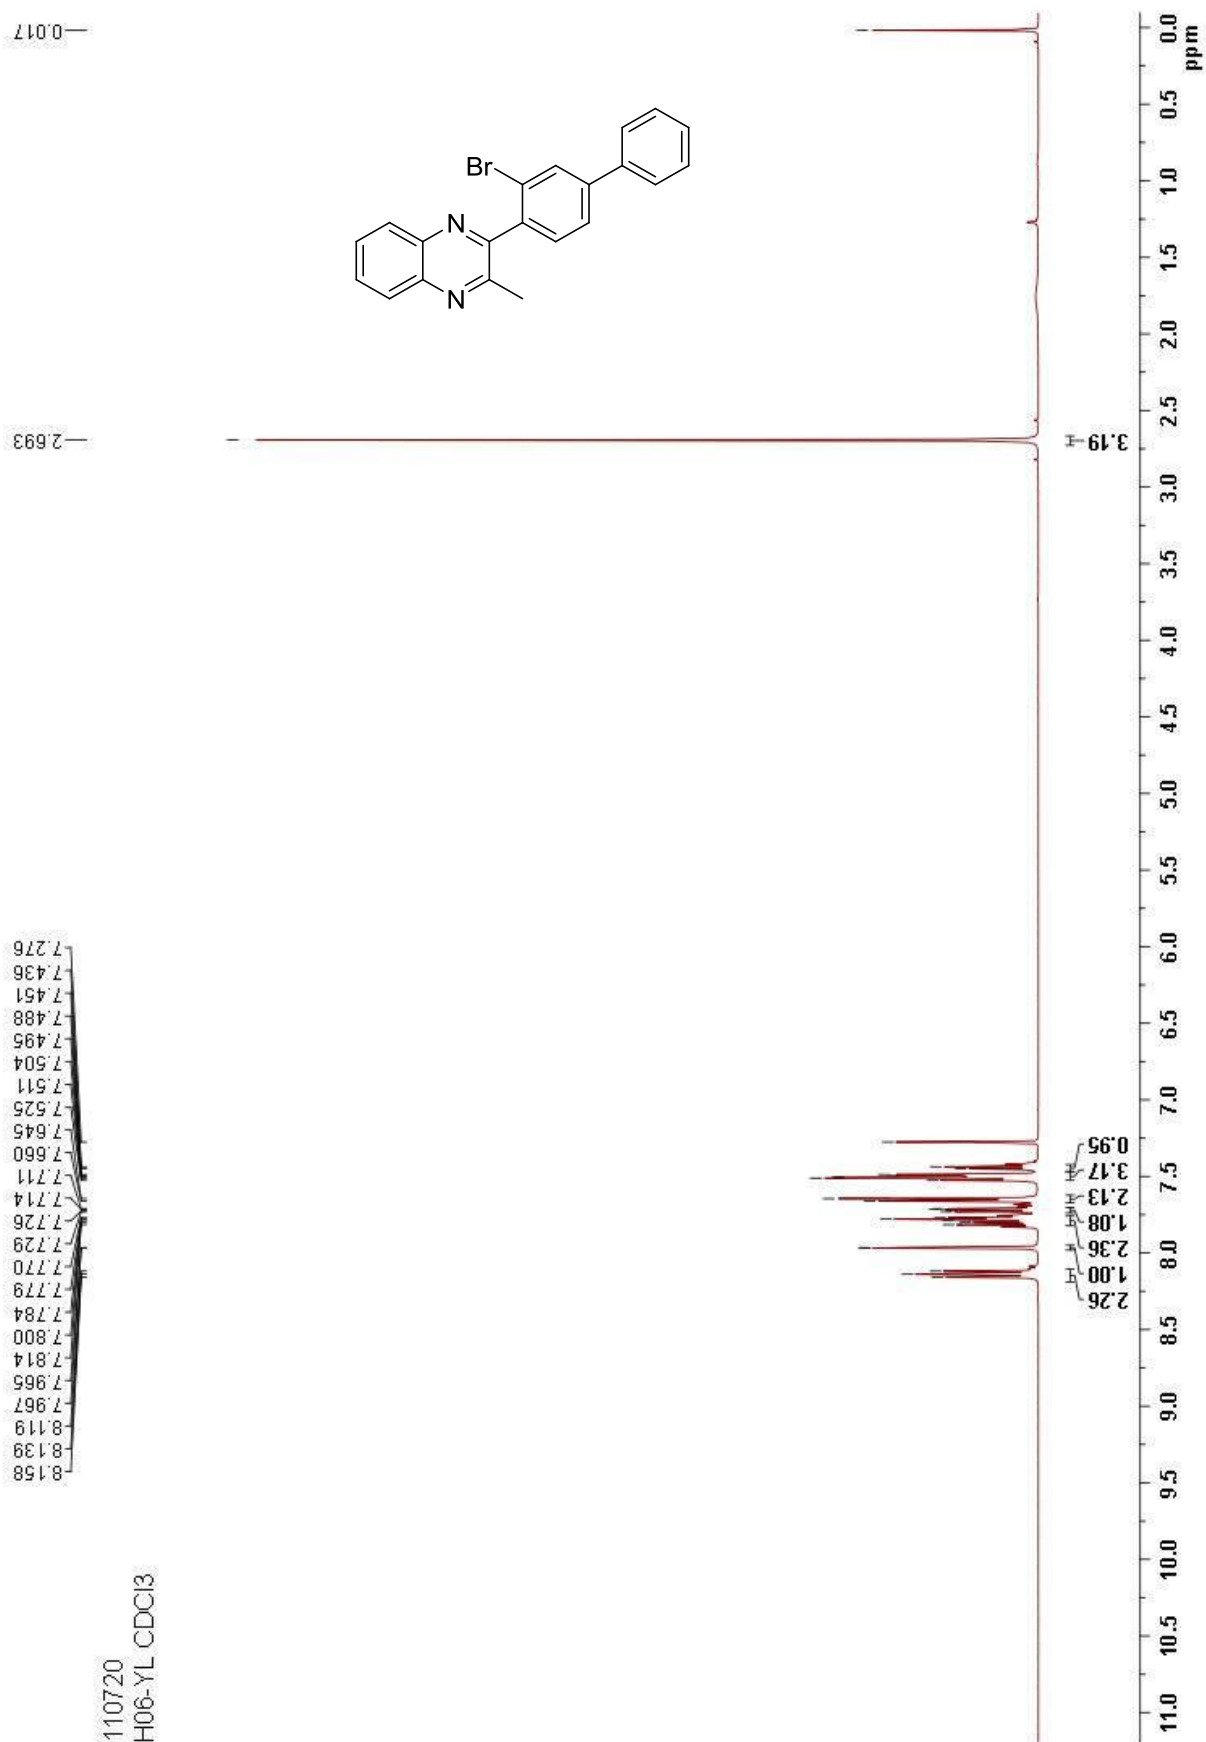

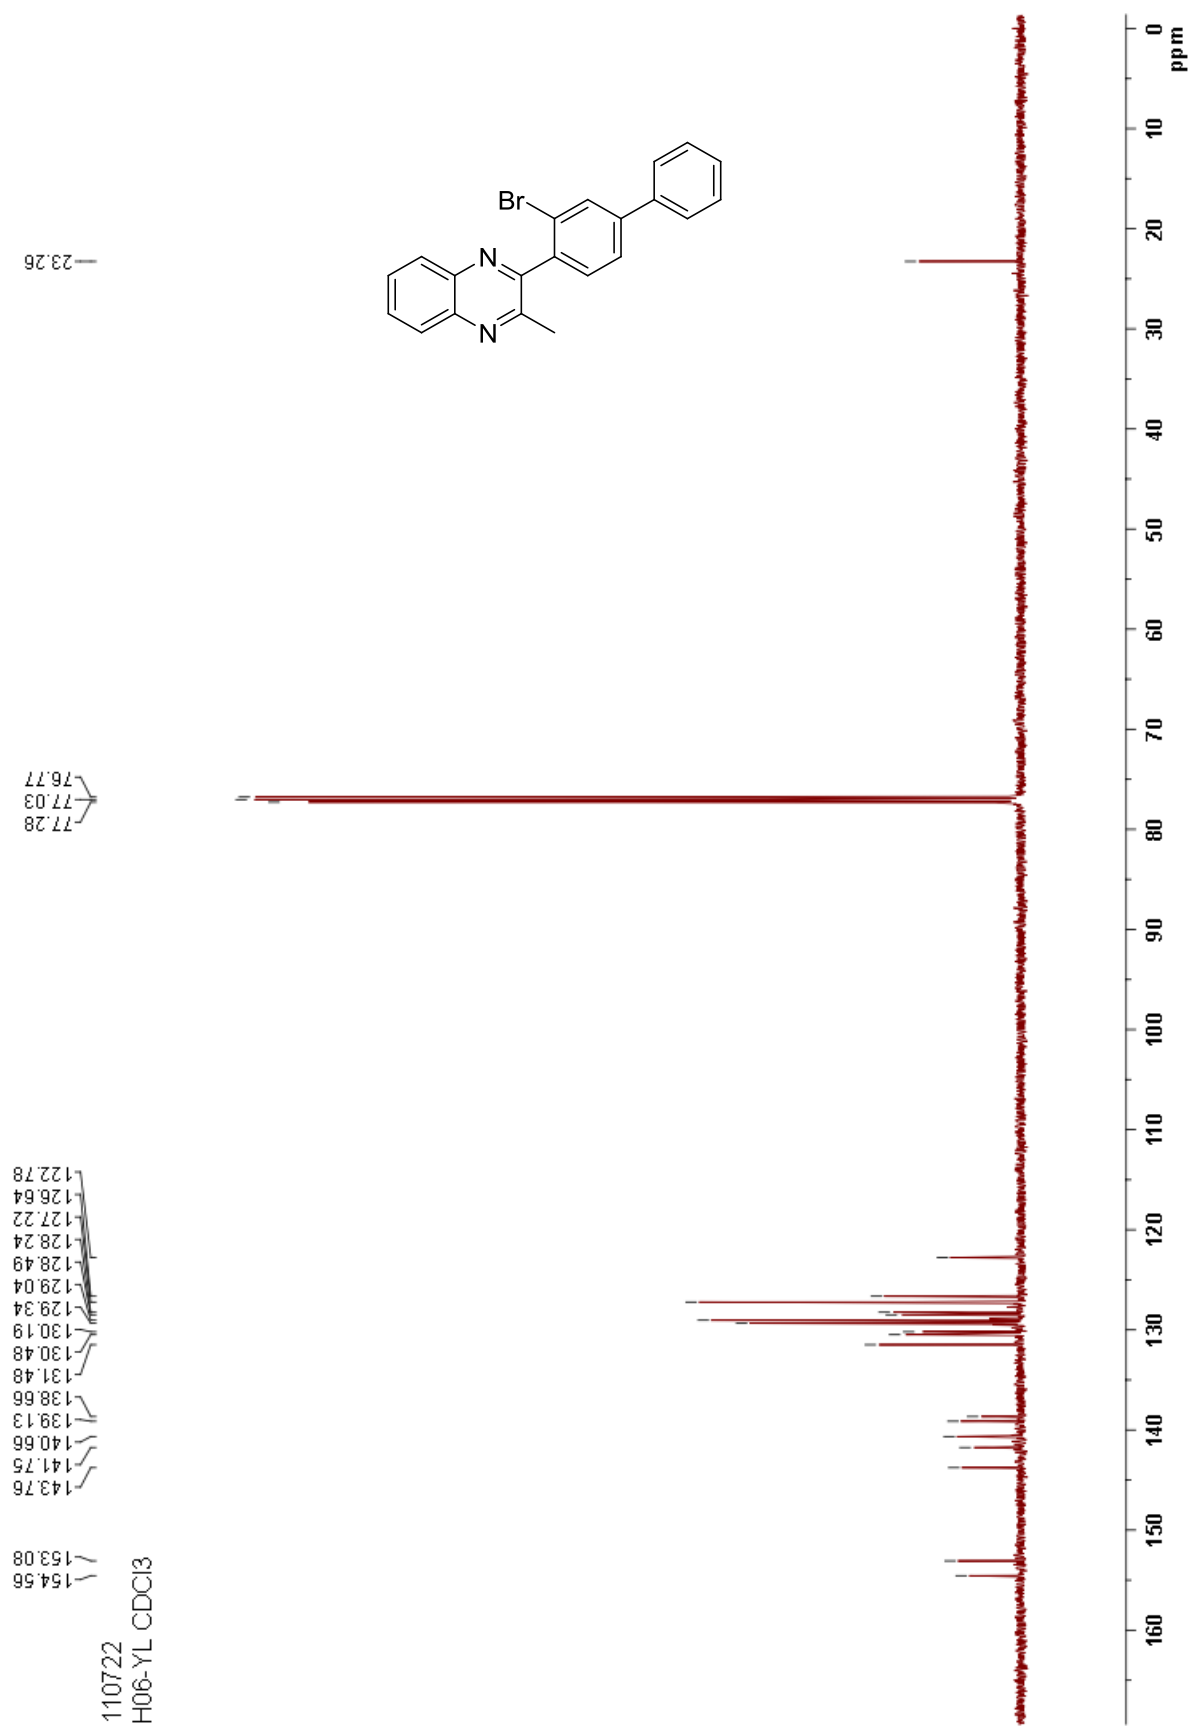

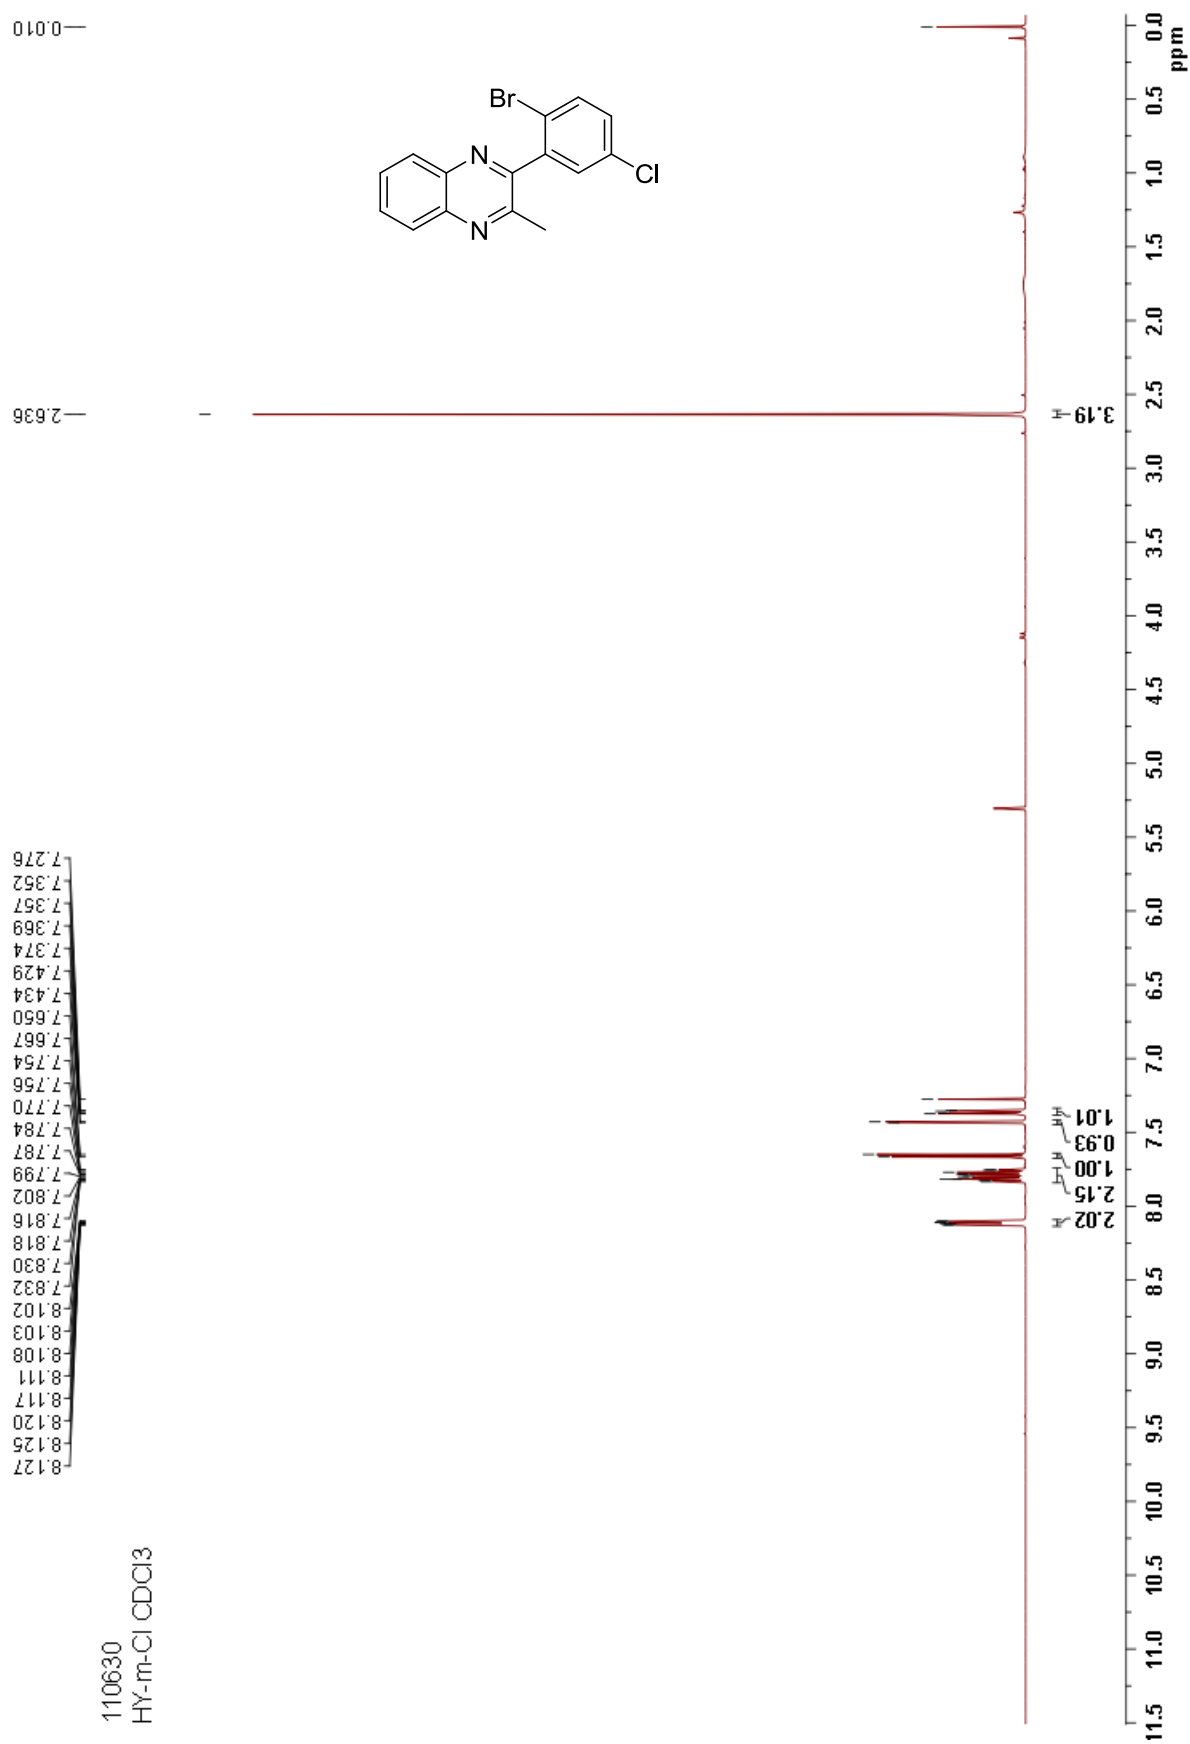

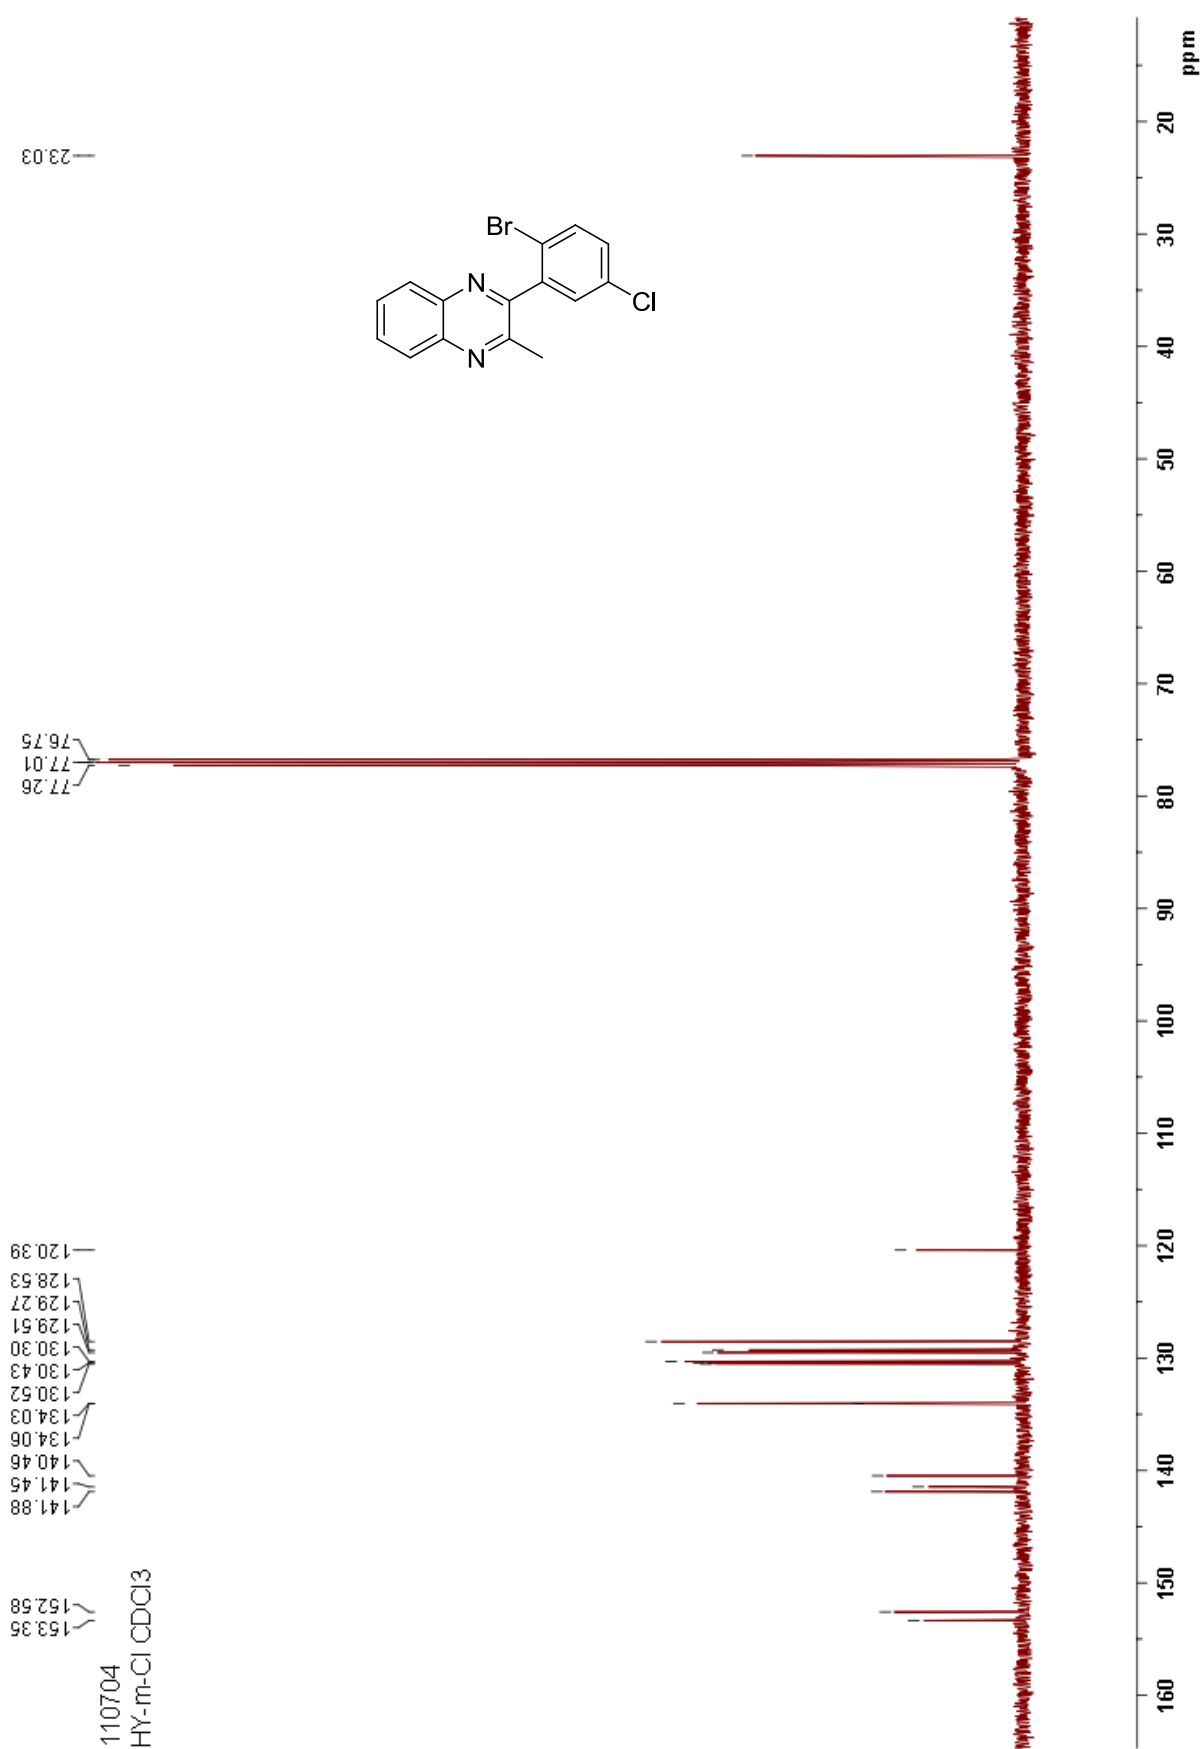

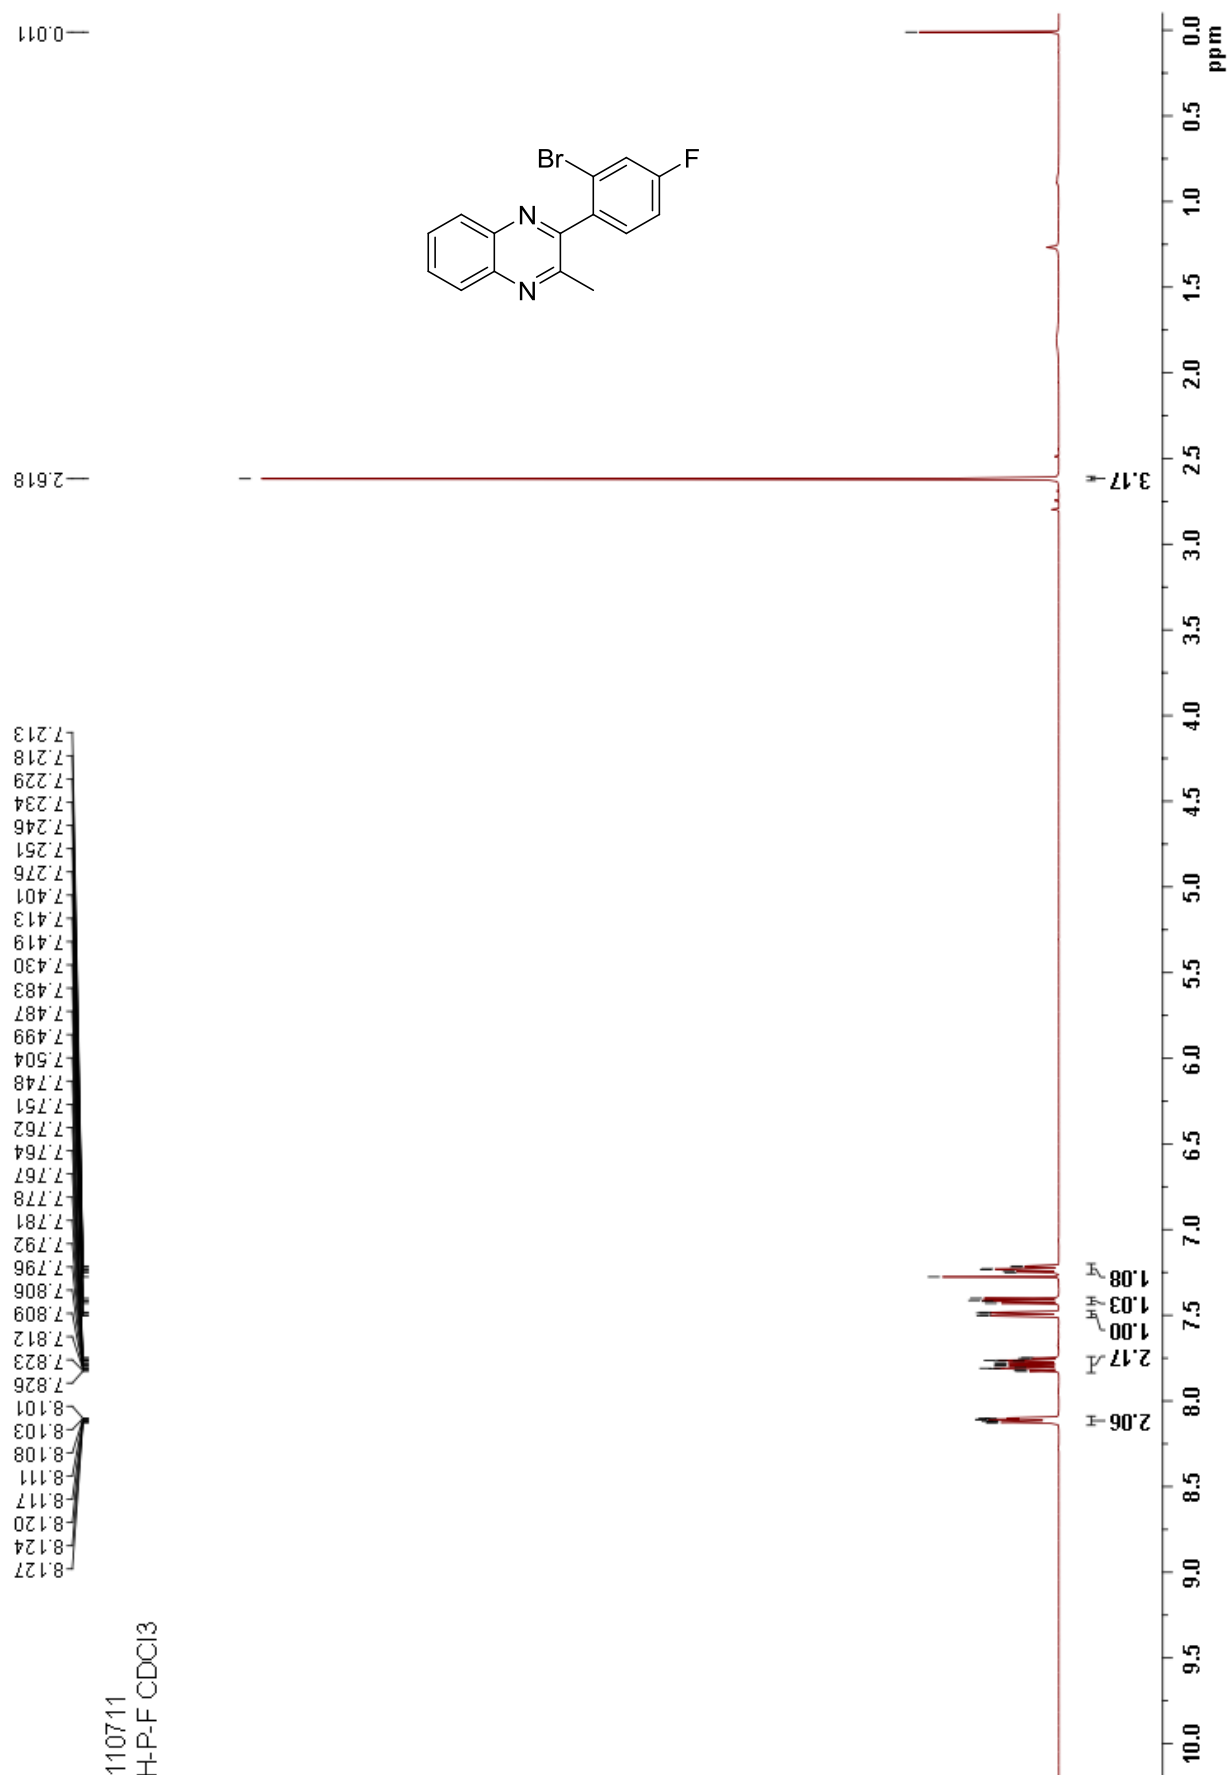

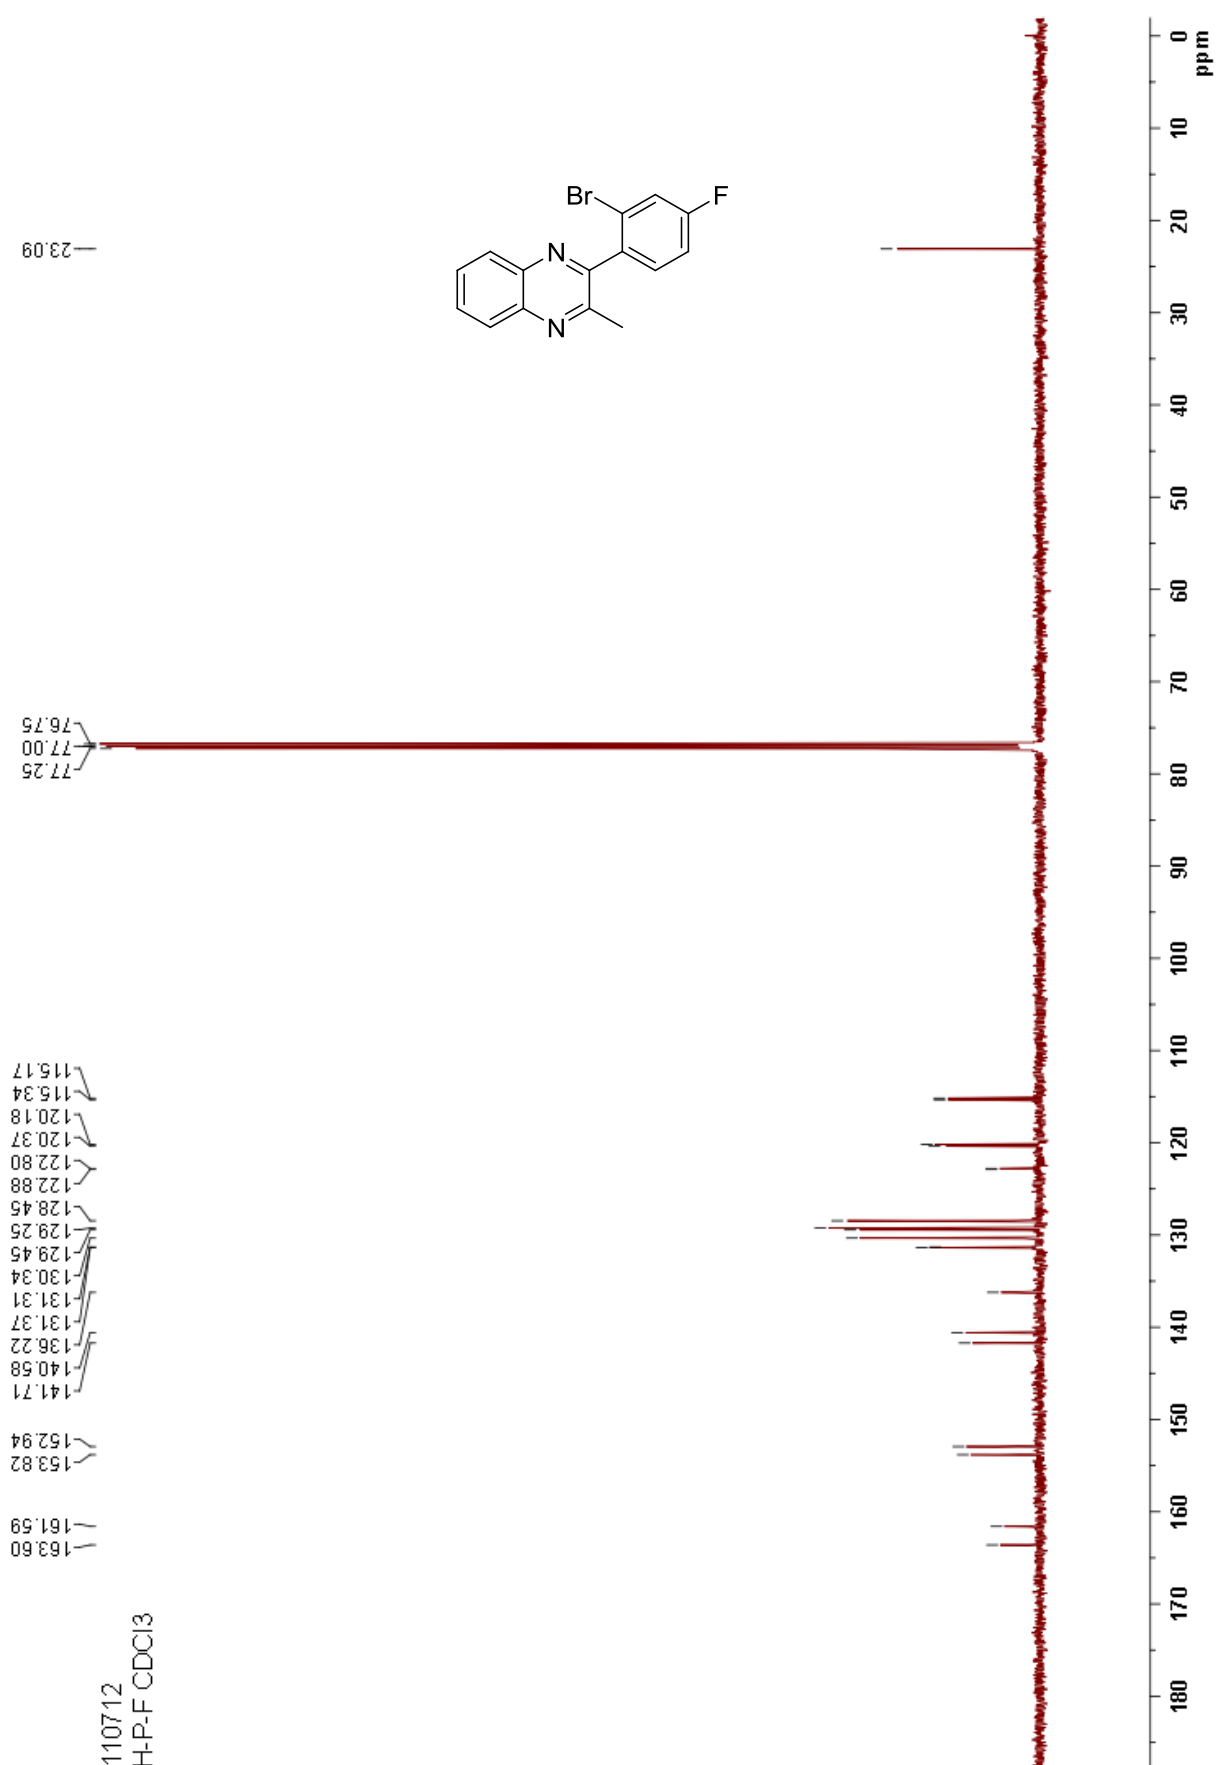

81018

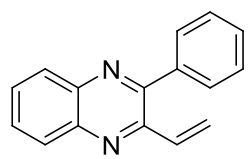

5.629  
5.633  
5.650  
5.654  
5.658  
5.663  
5.683  
5.686  
7.048  
7.069  
7.082  
7.103  
7.275  
7.528  
7.533  
7.536  
7.544  
7.547  
7.701  
7.704  
7.707  
7.717  
7.720  
7.738  
7.742  
7.750  
7.753  
7.755  
7.758  
7.766  
7.770  
8.120  
8.124  
8.131  
8.135  
8.139  
8.146

101015  
OLE001 CDCl3

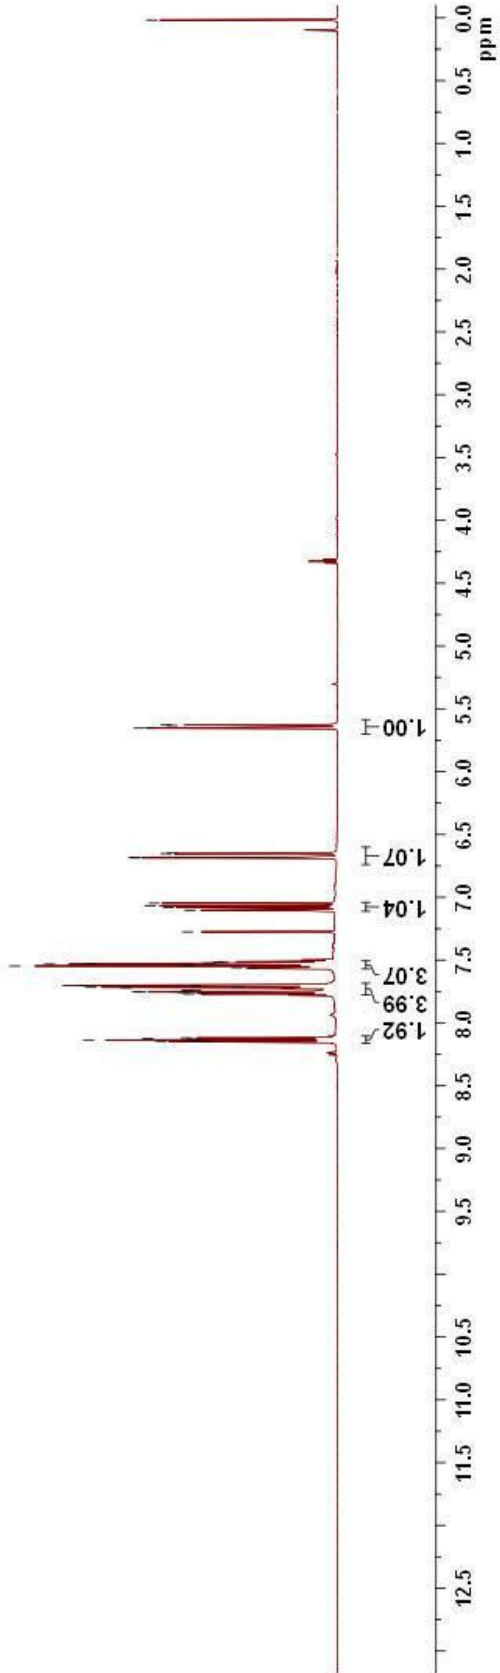



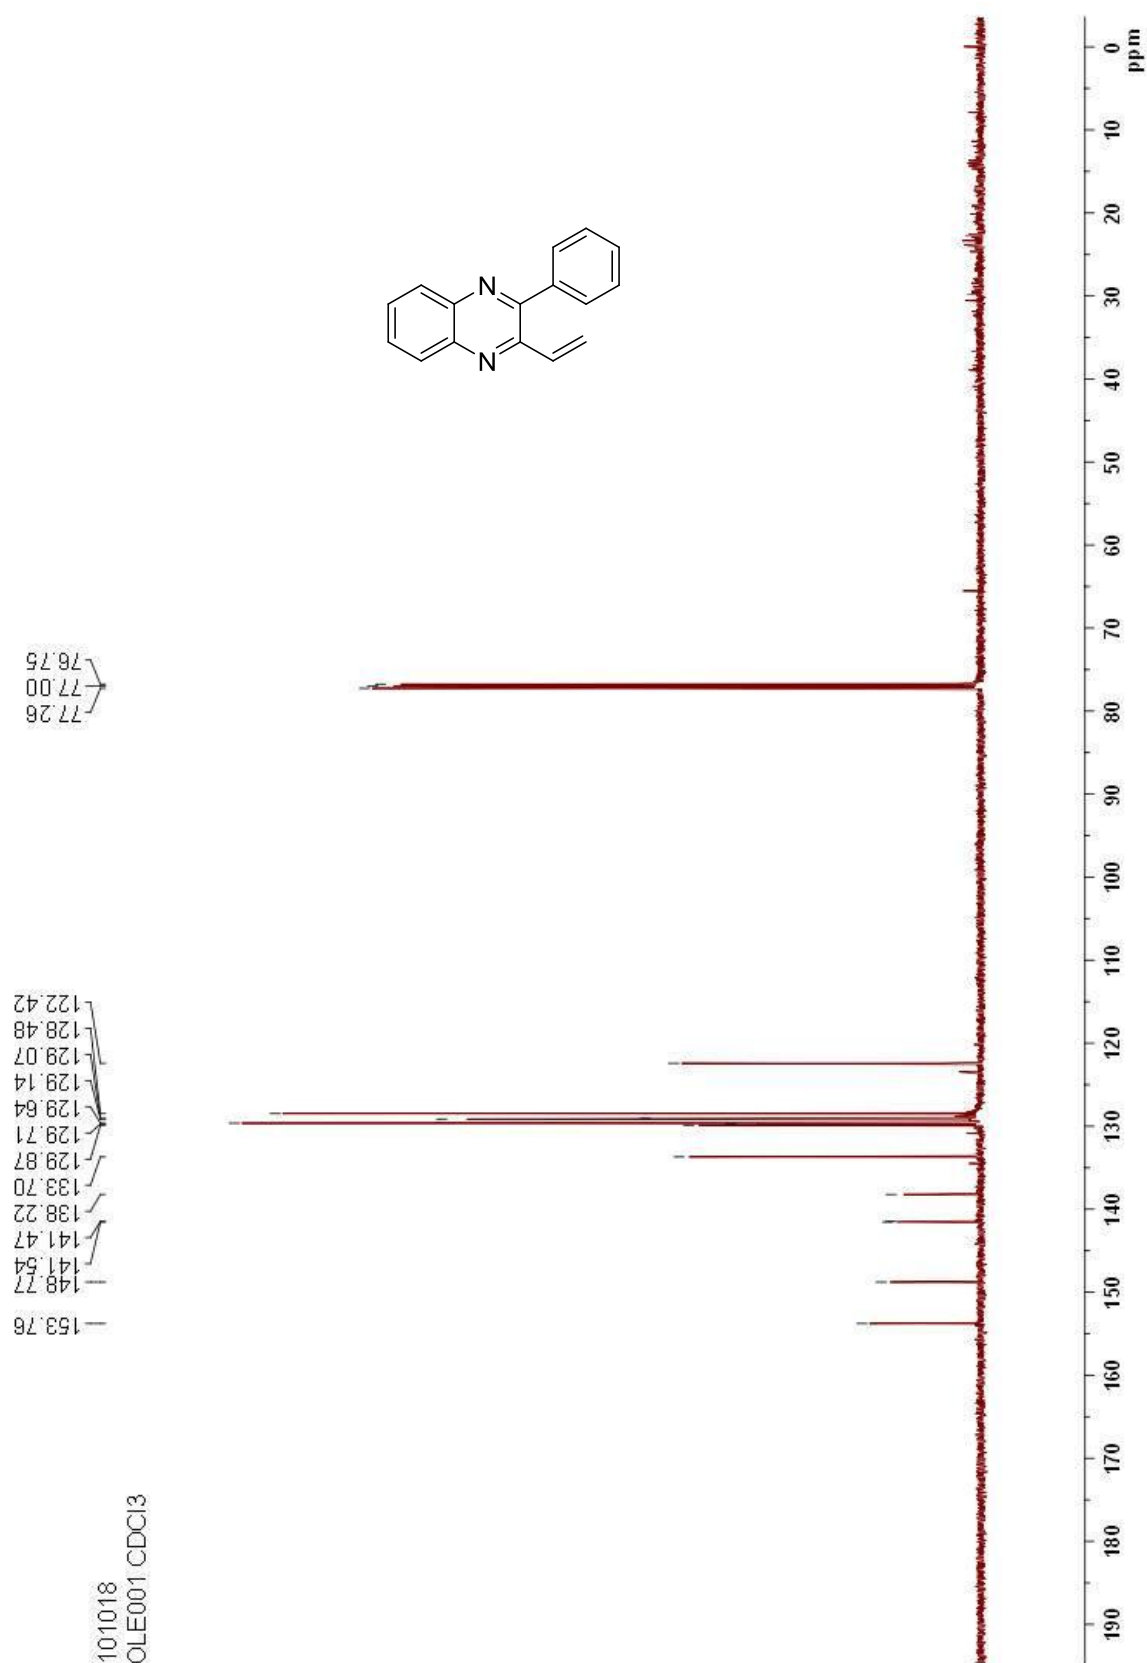

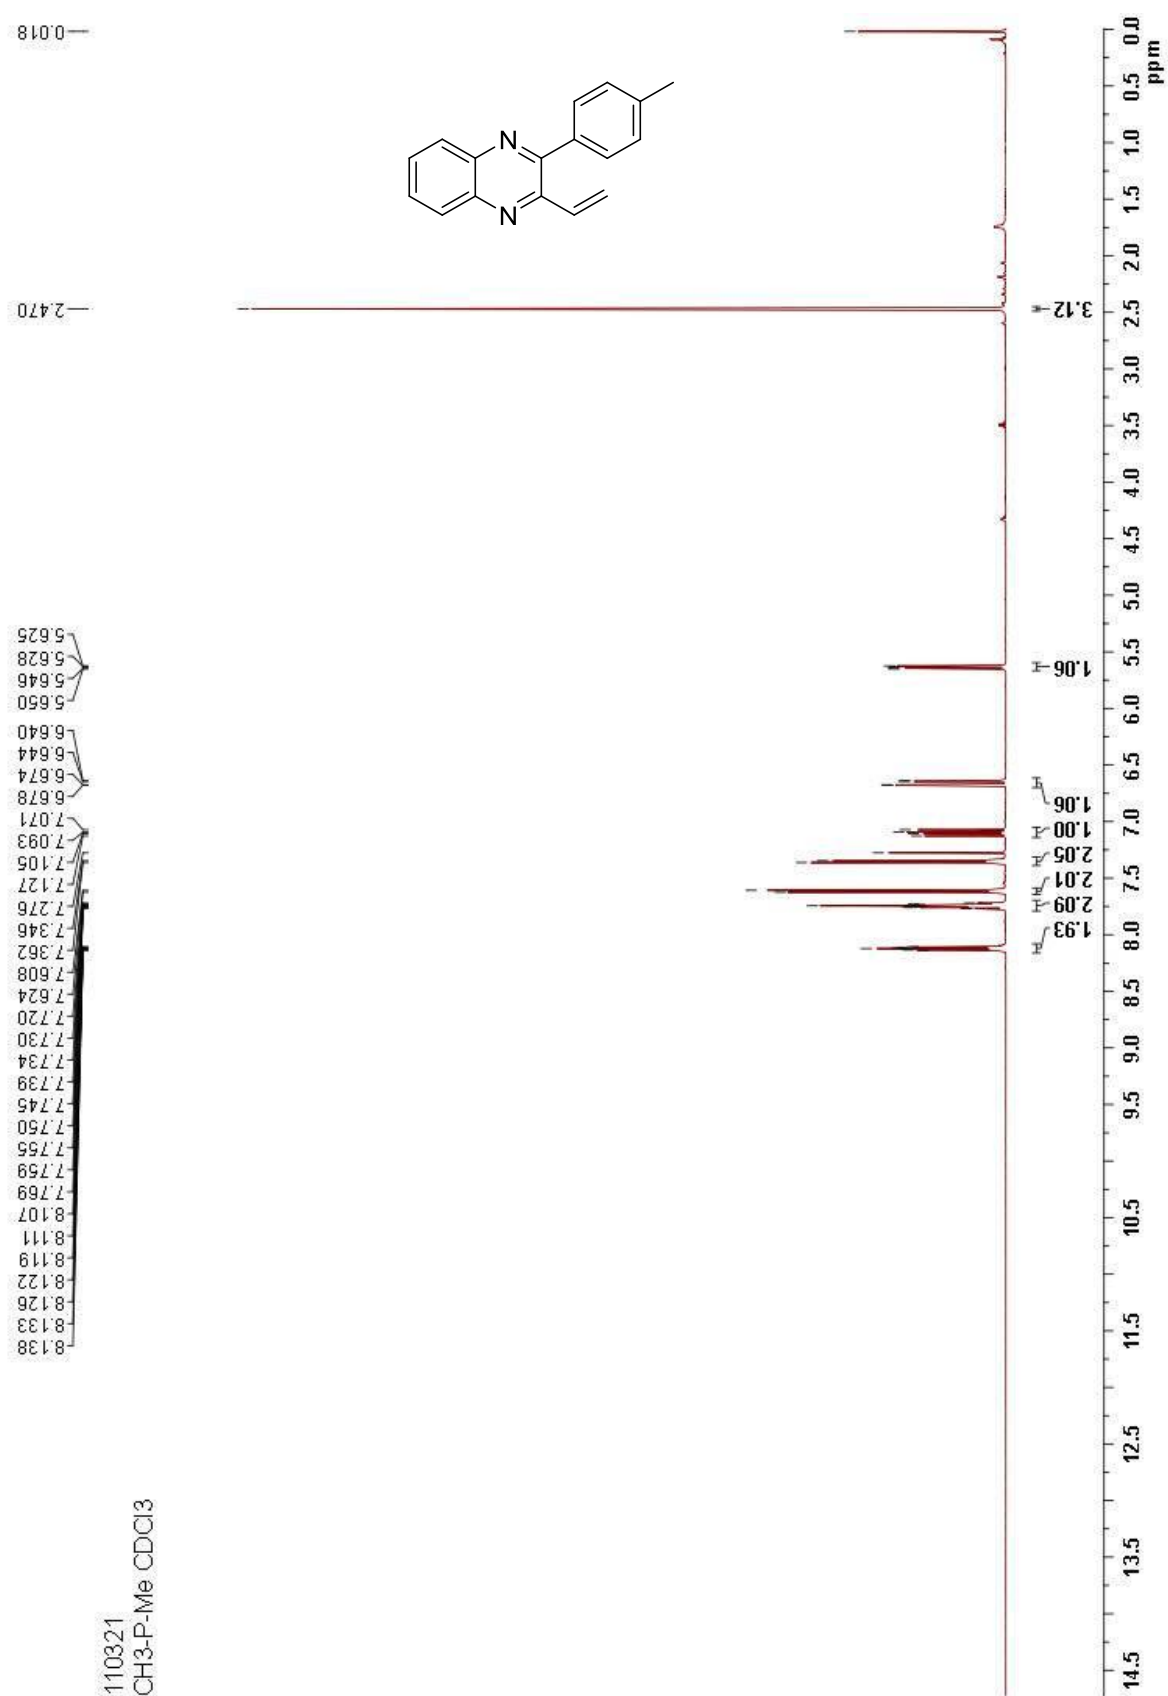

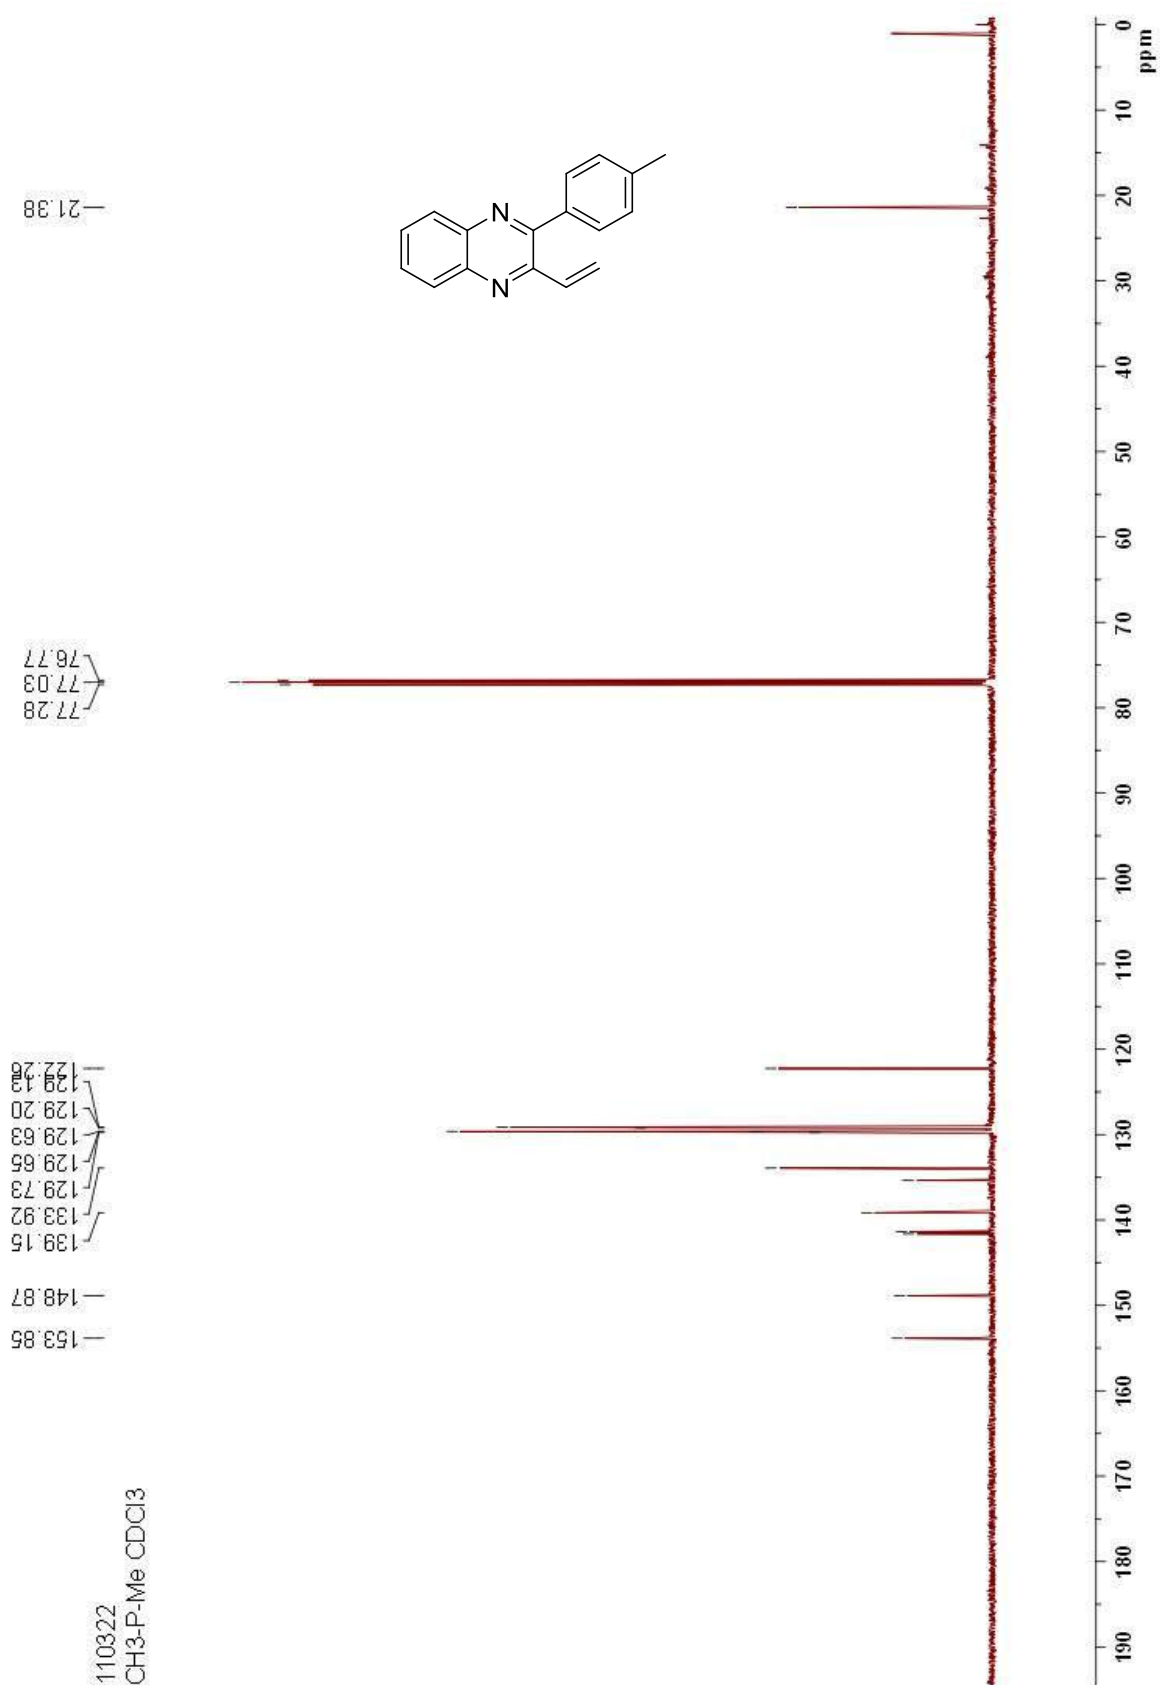

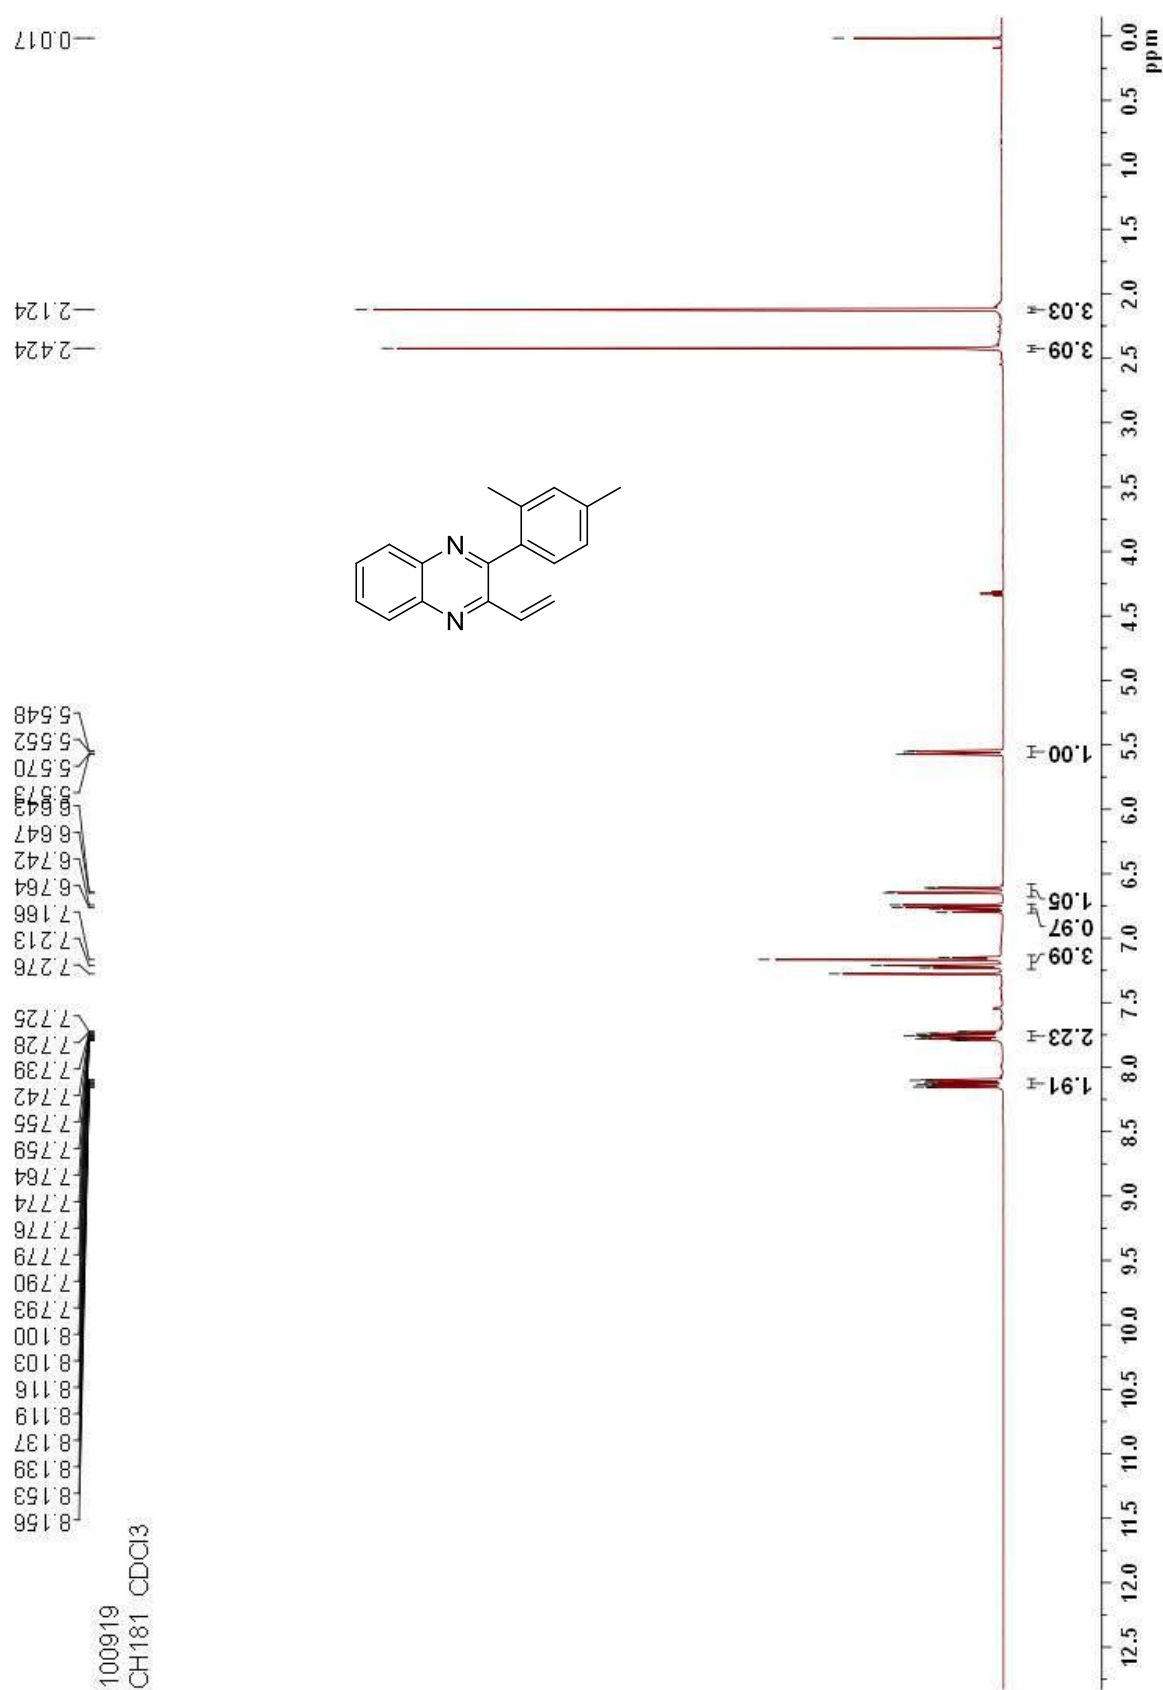

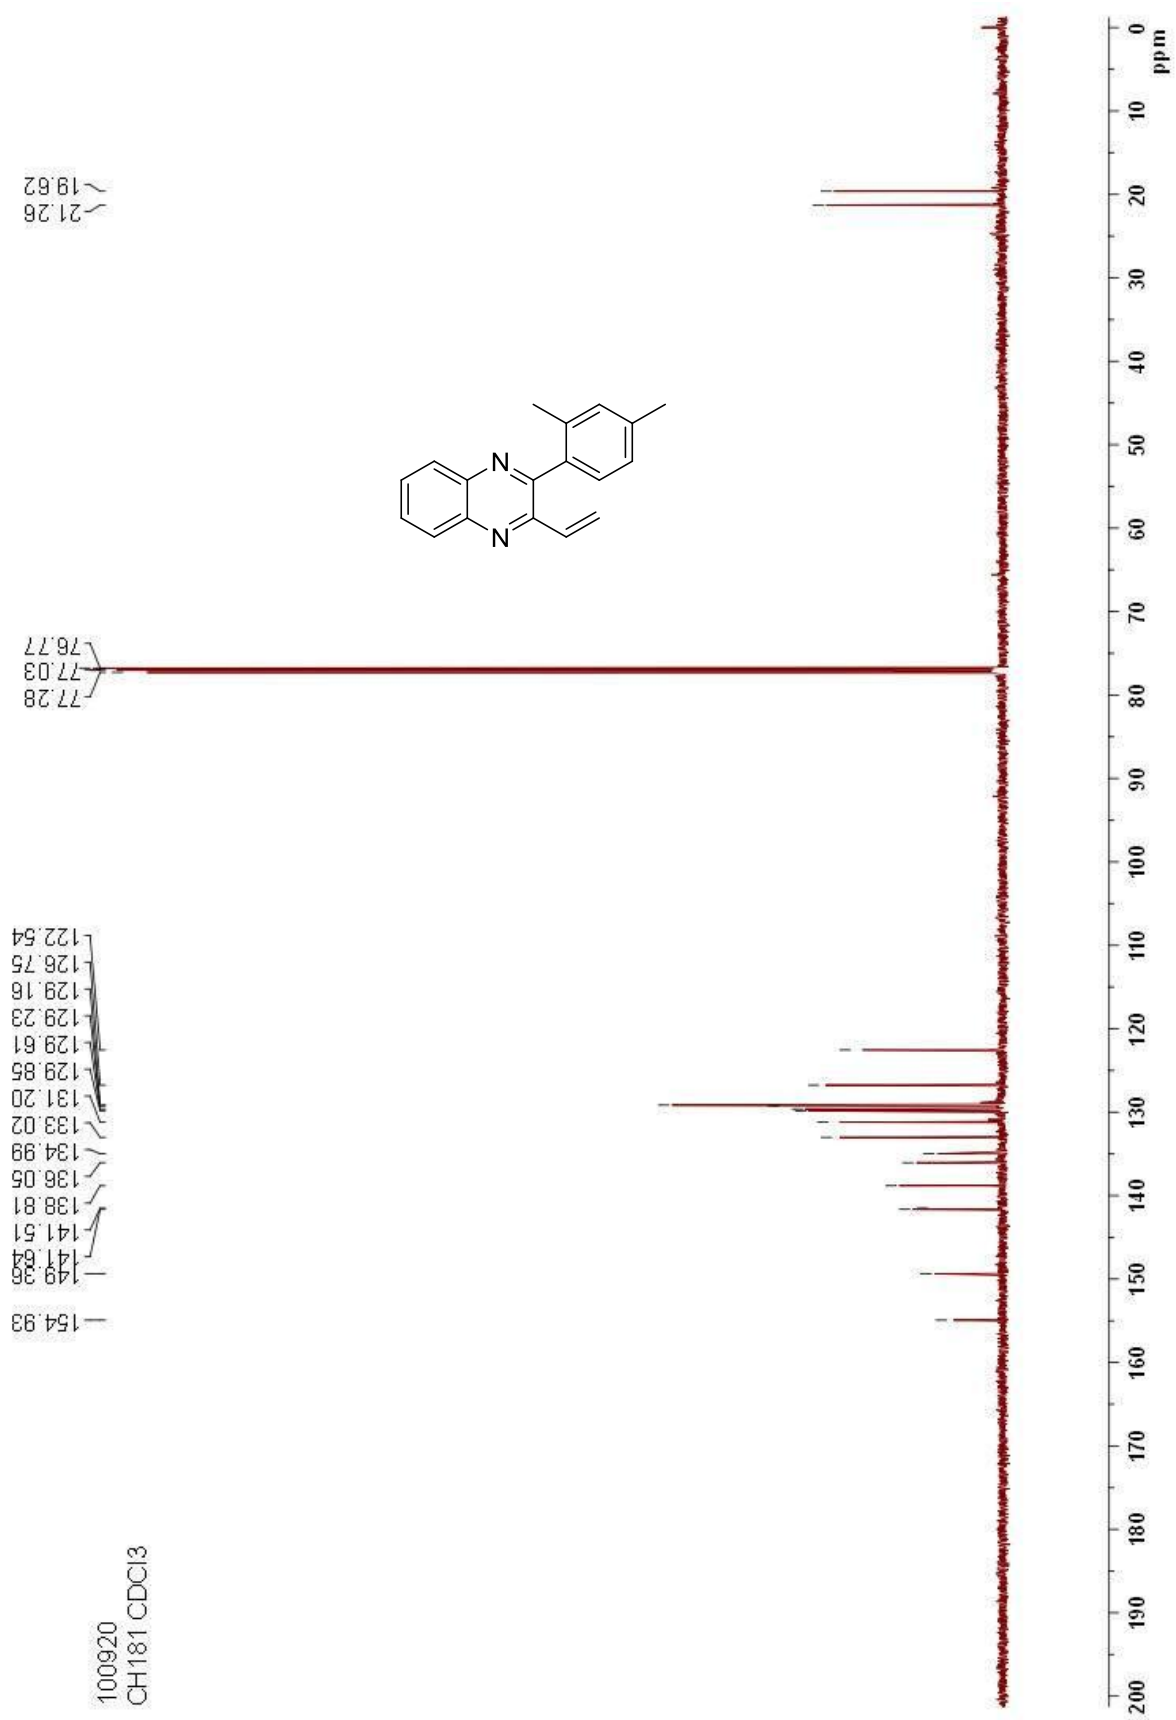

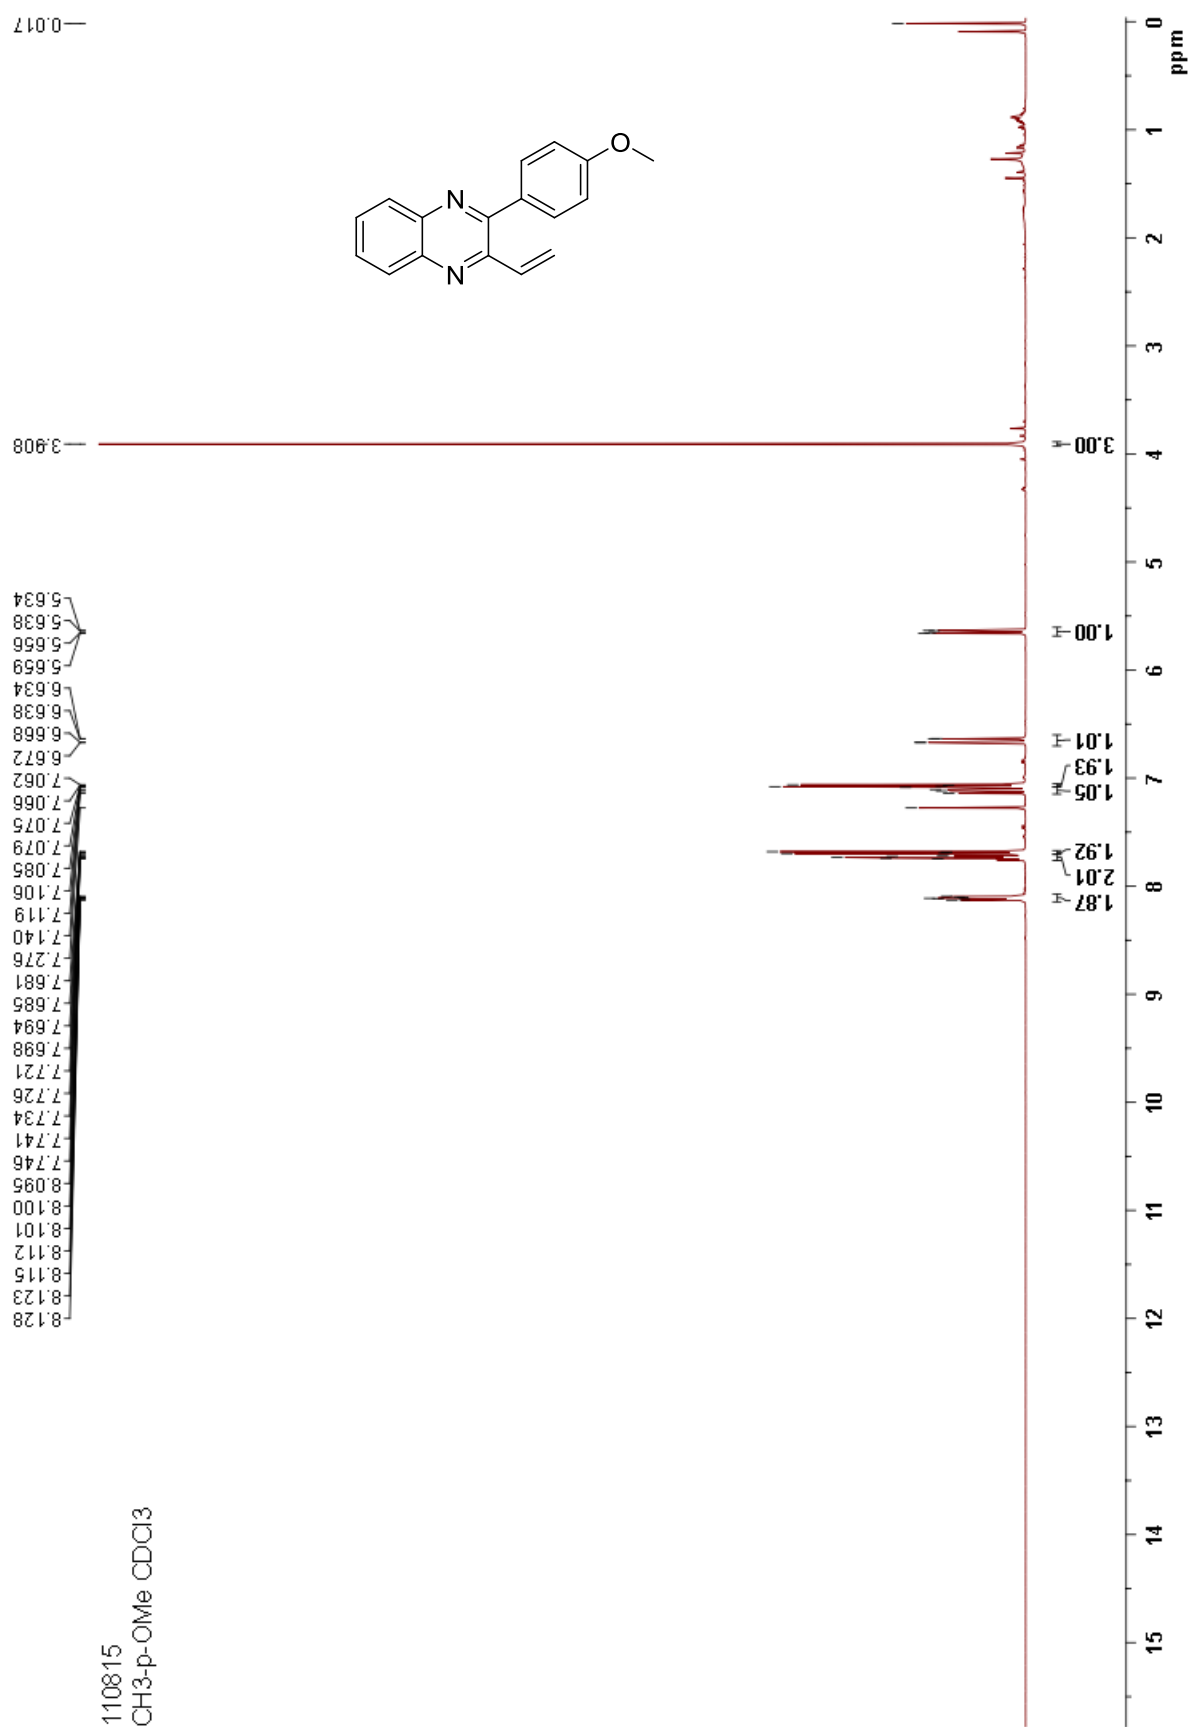

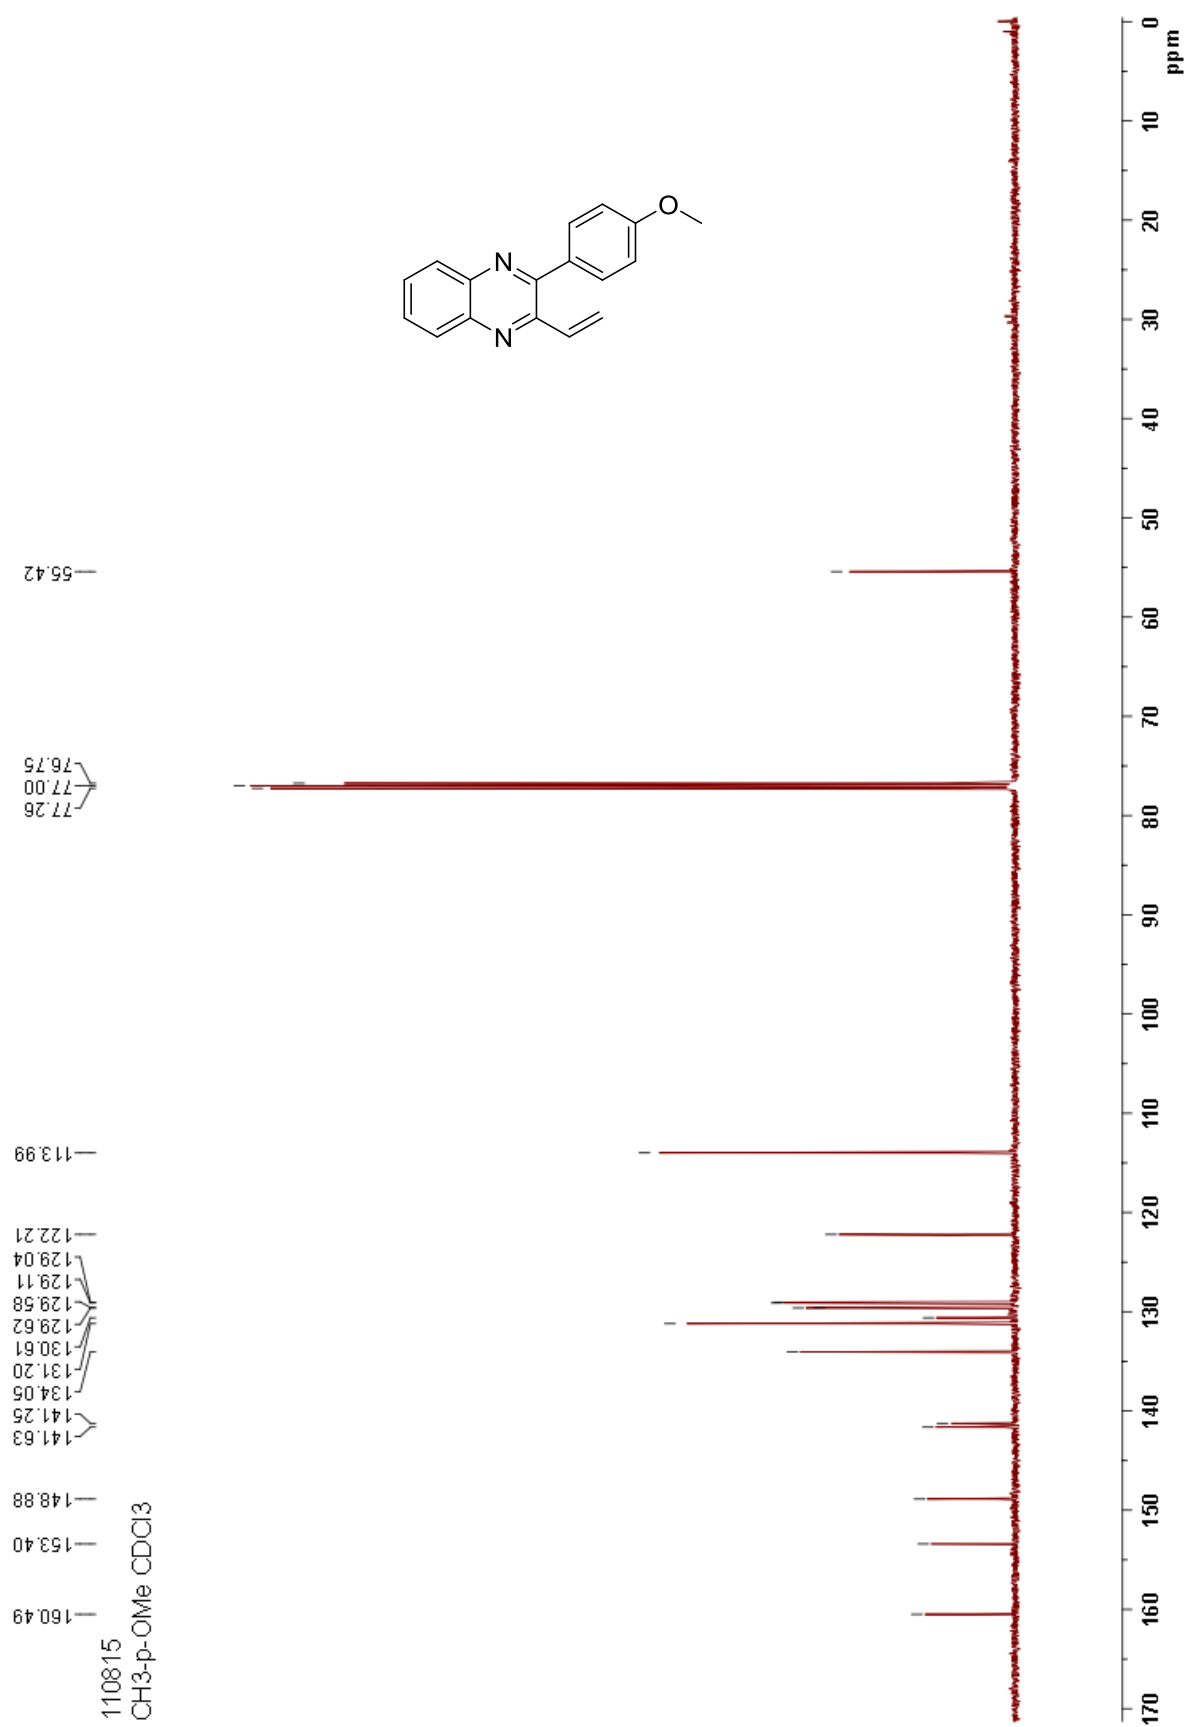

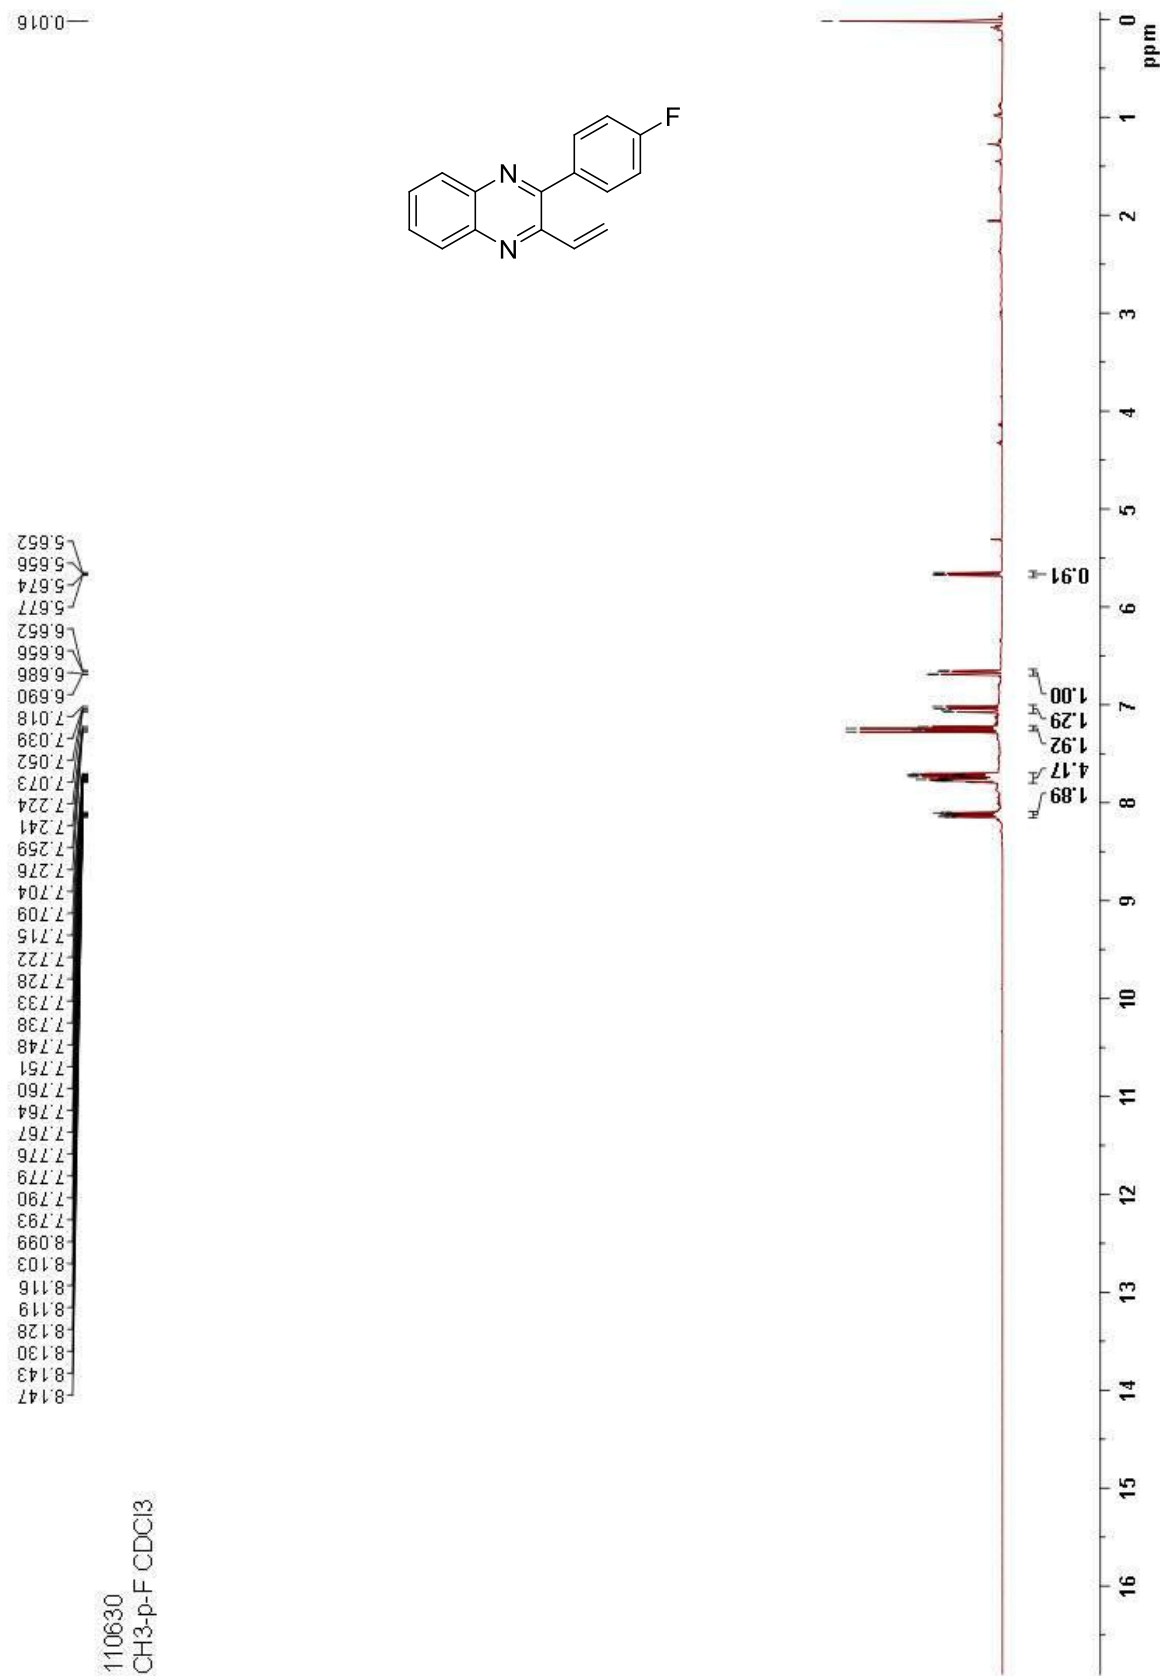



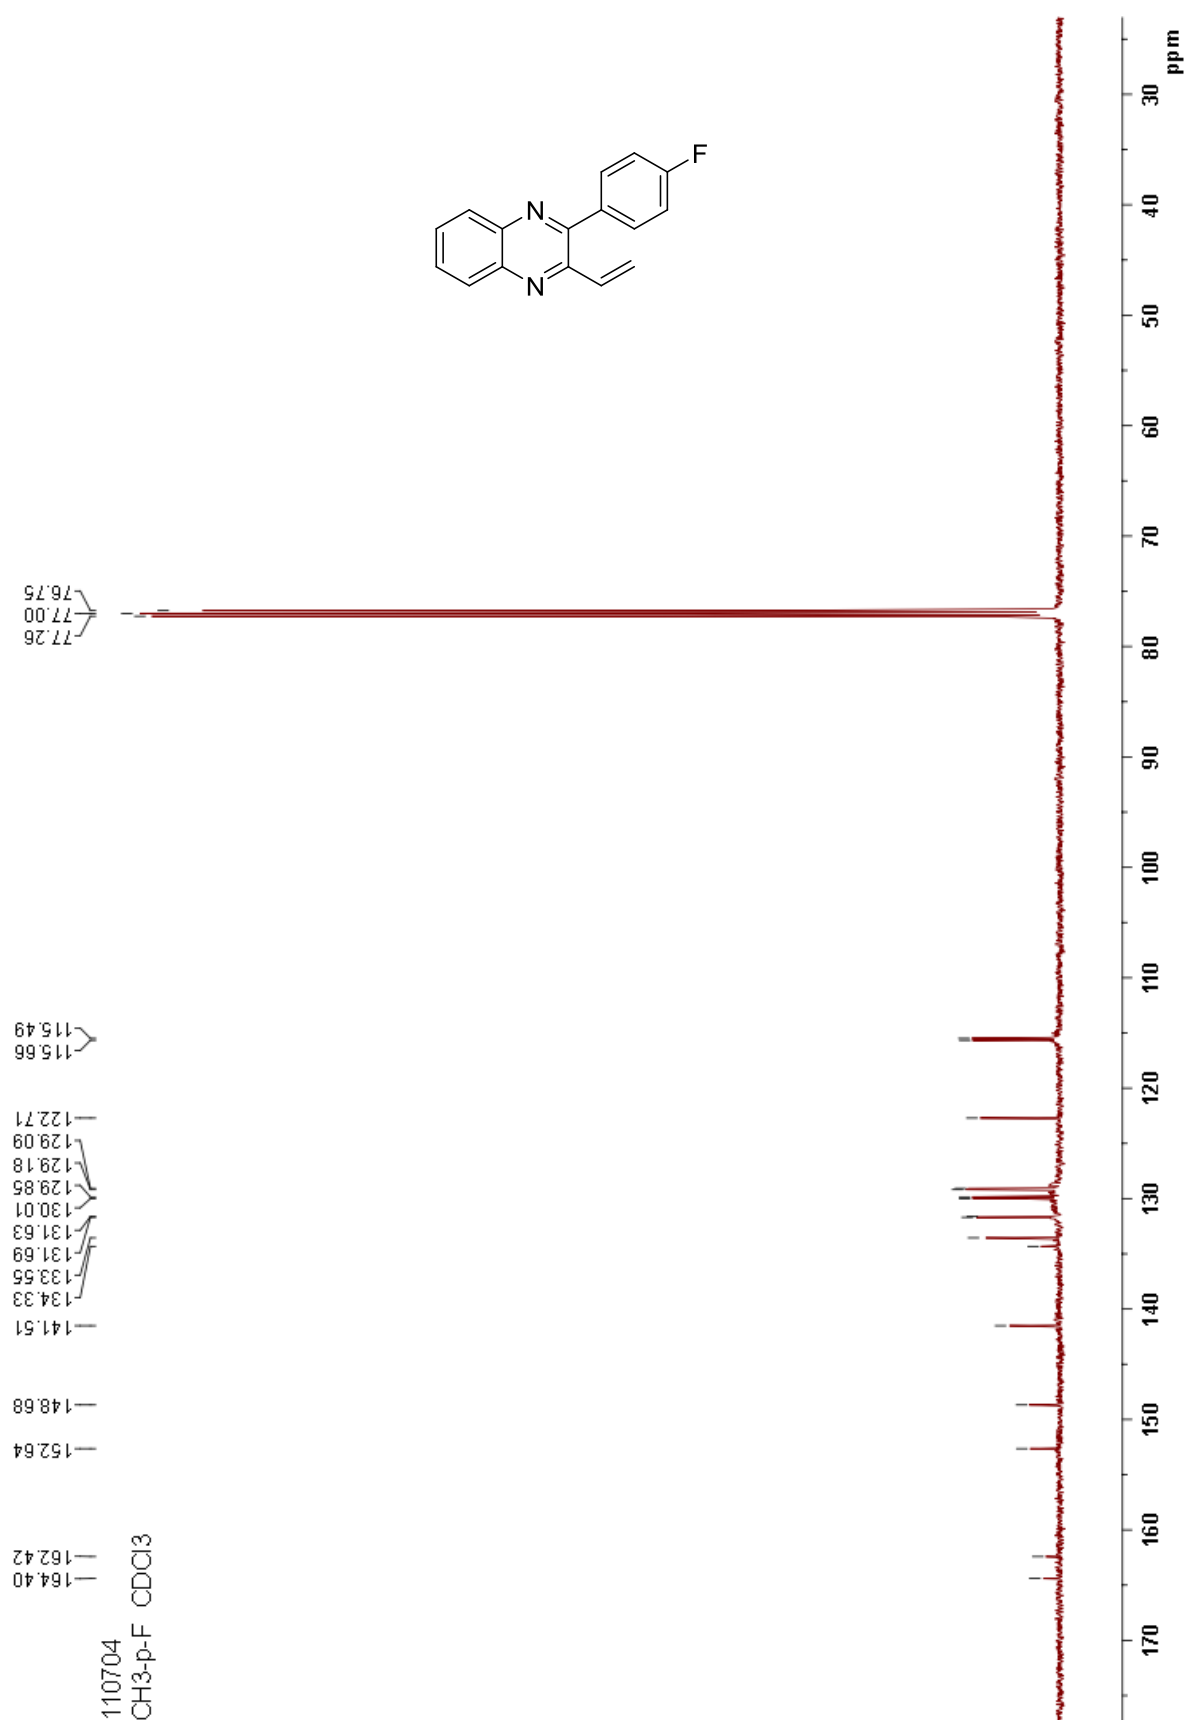

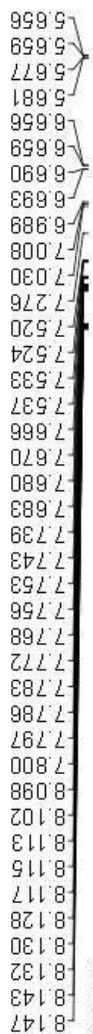

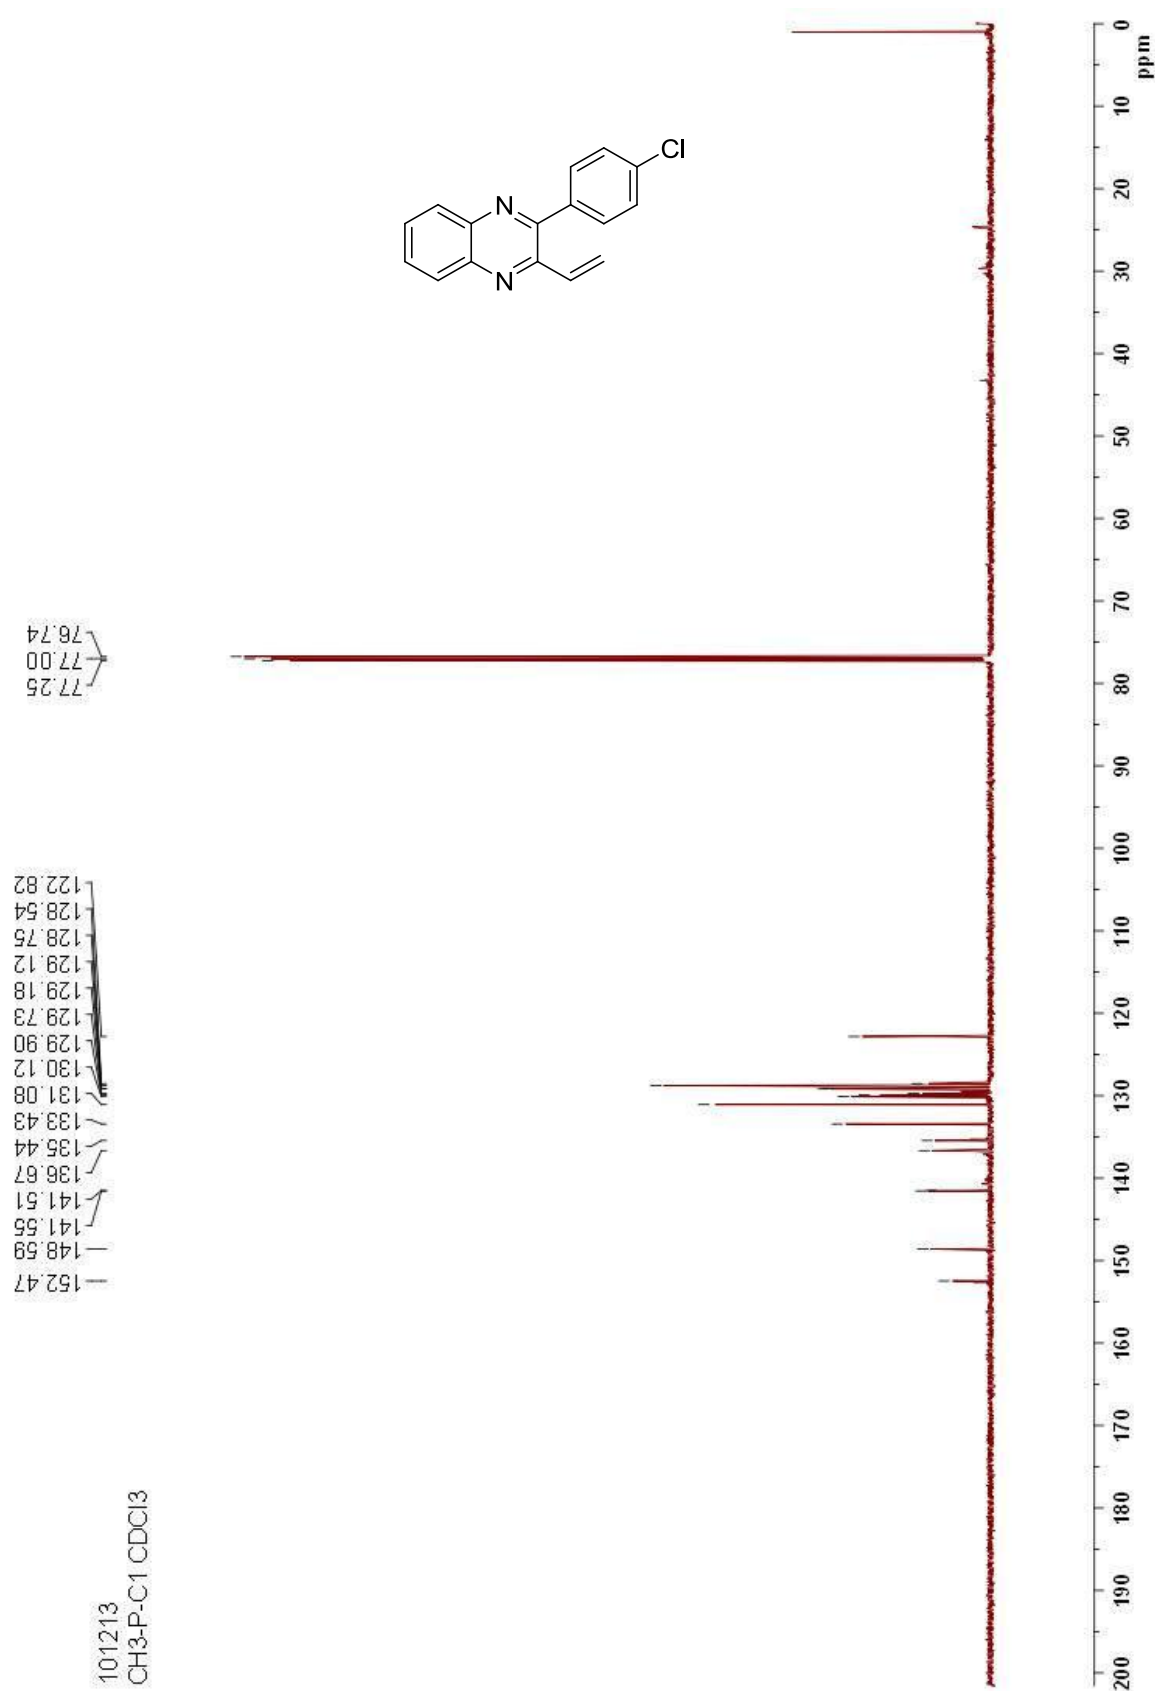

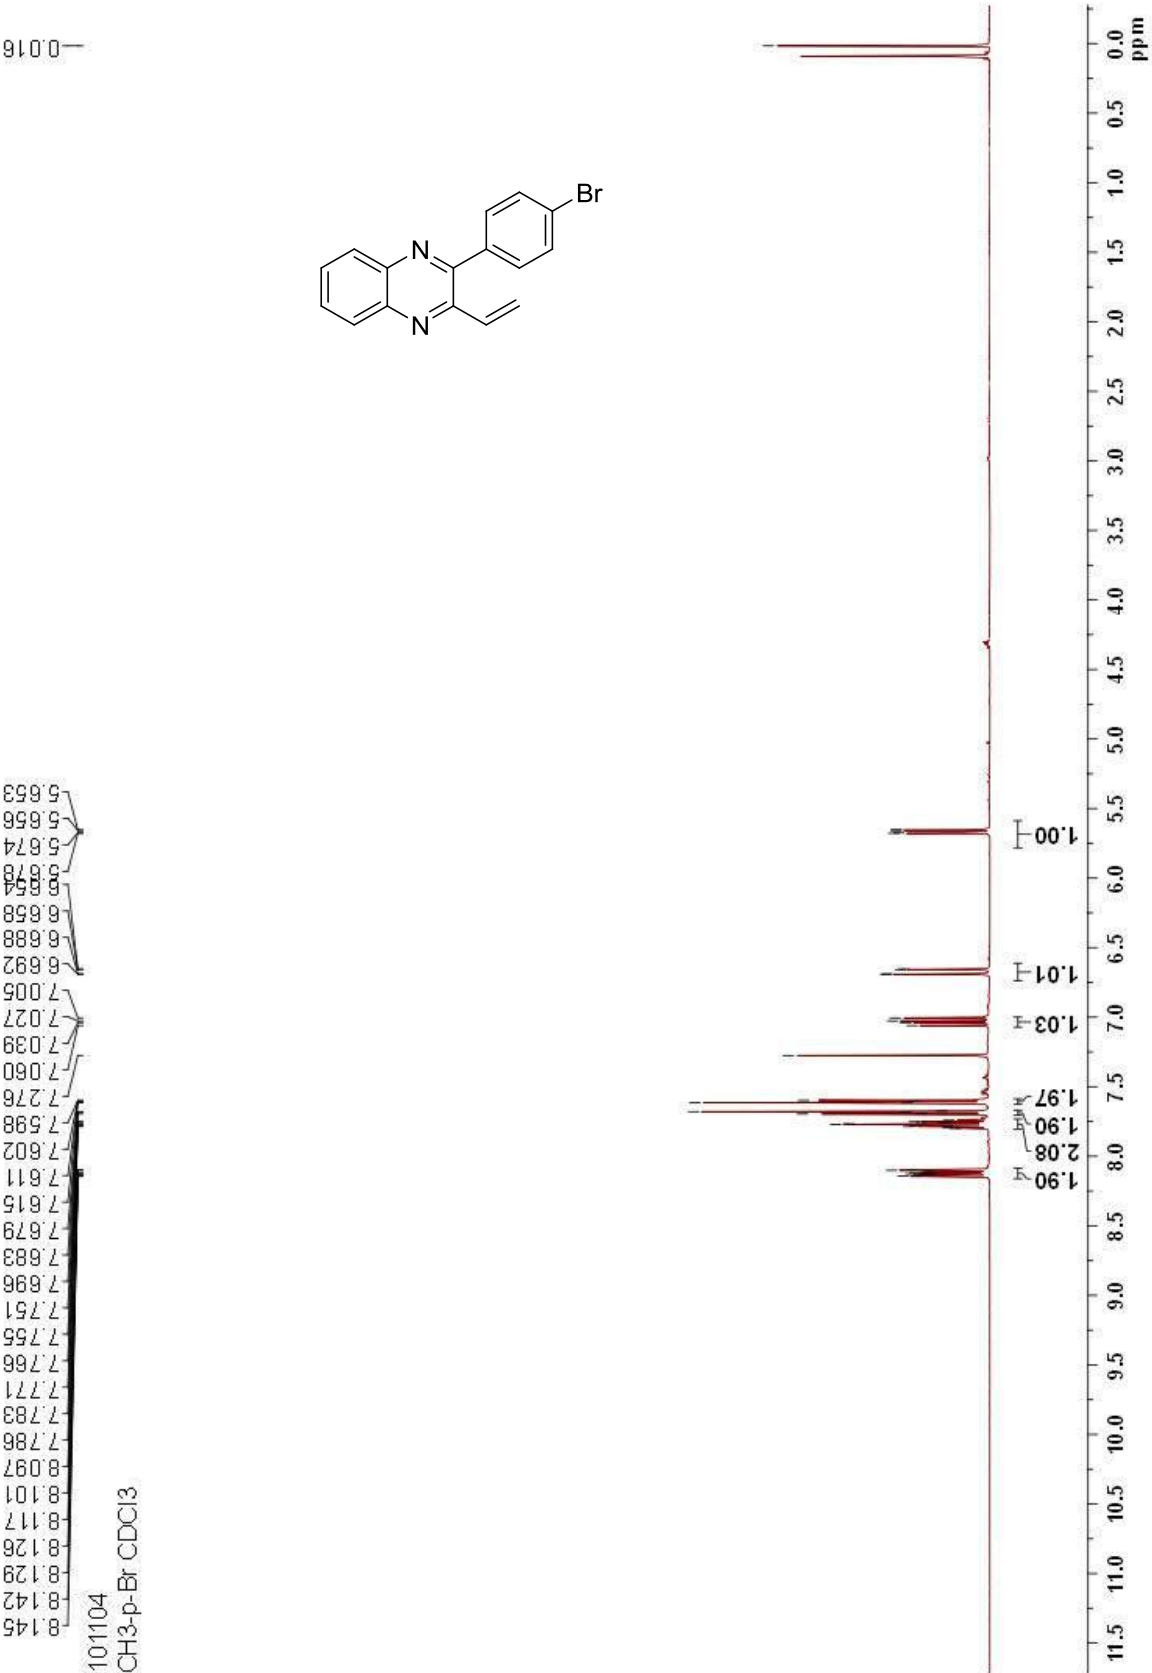

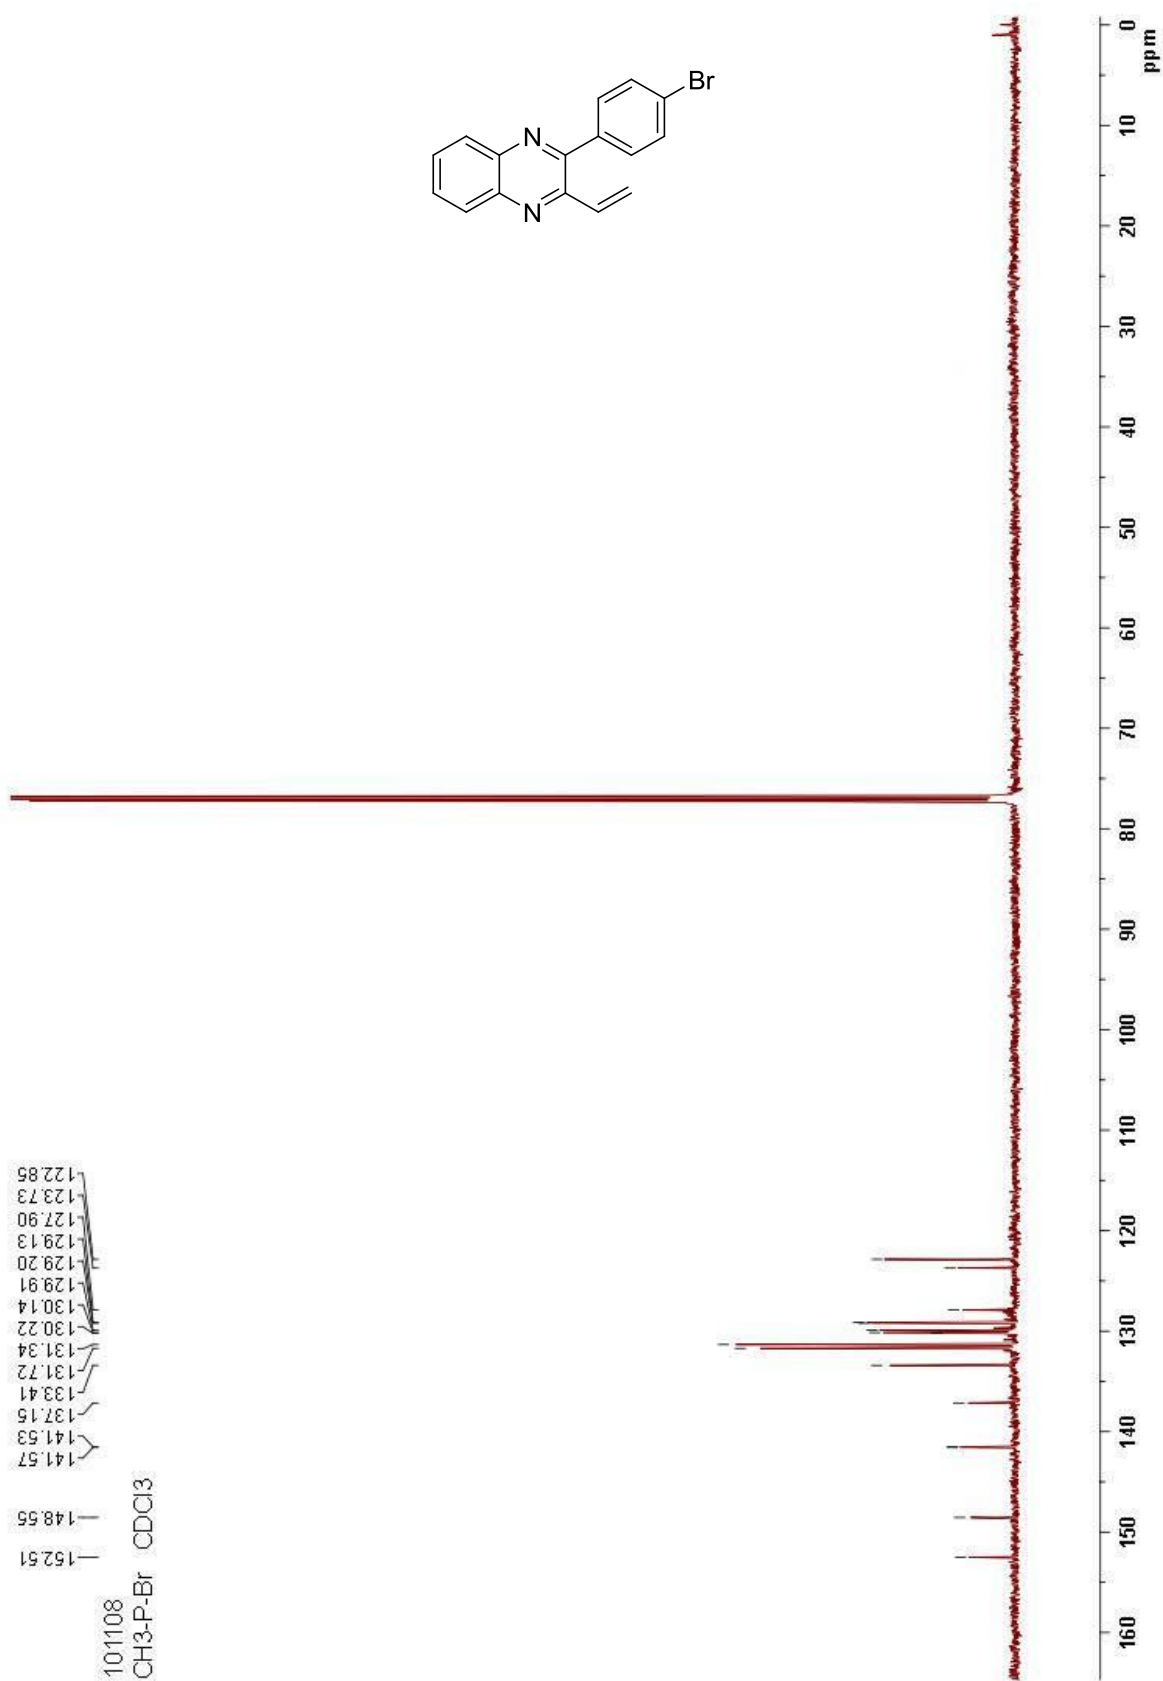

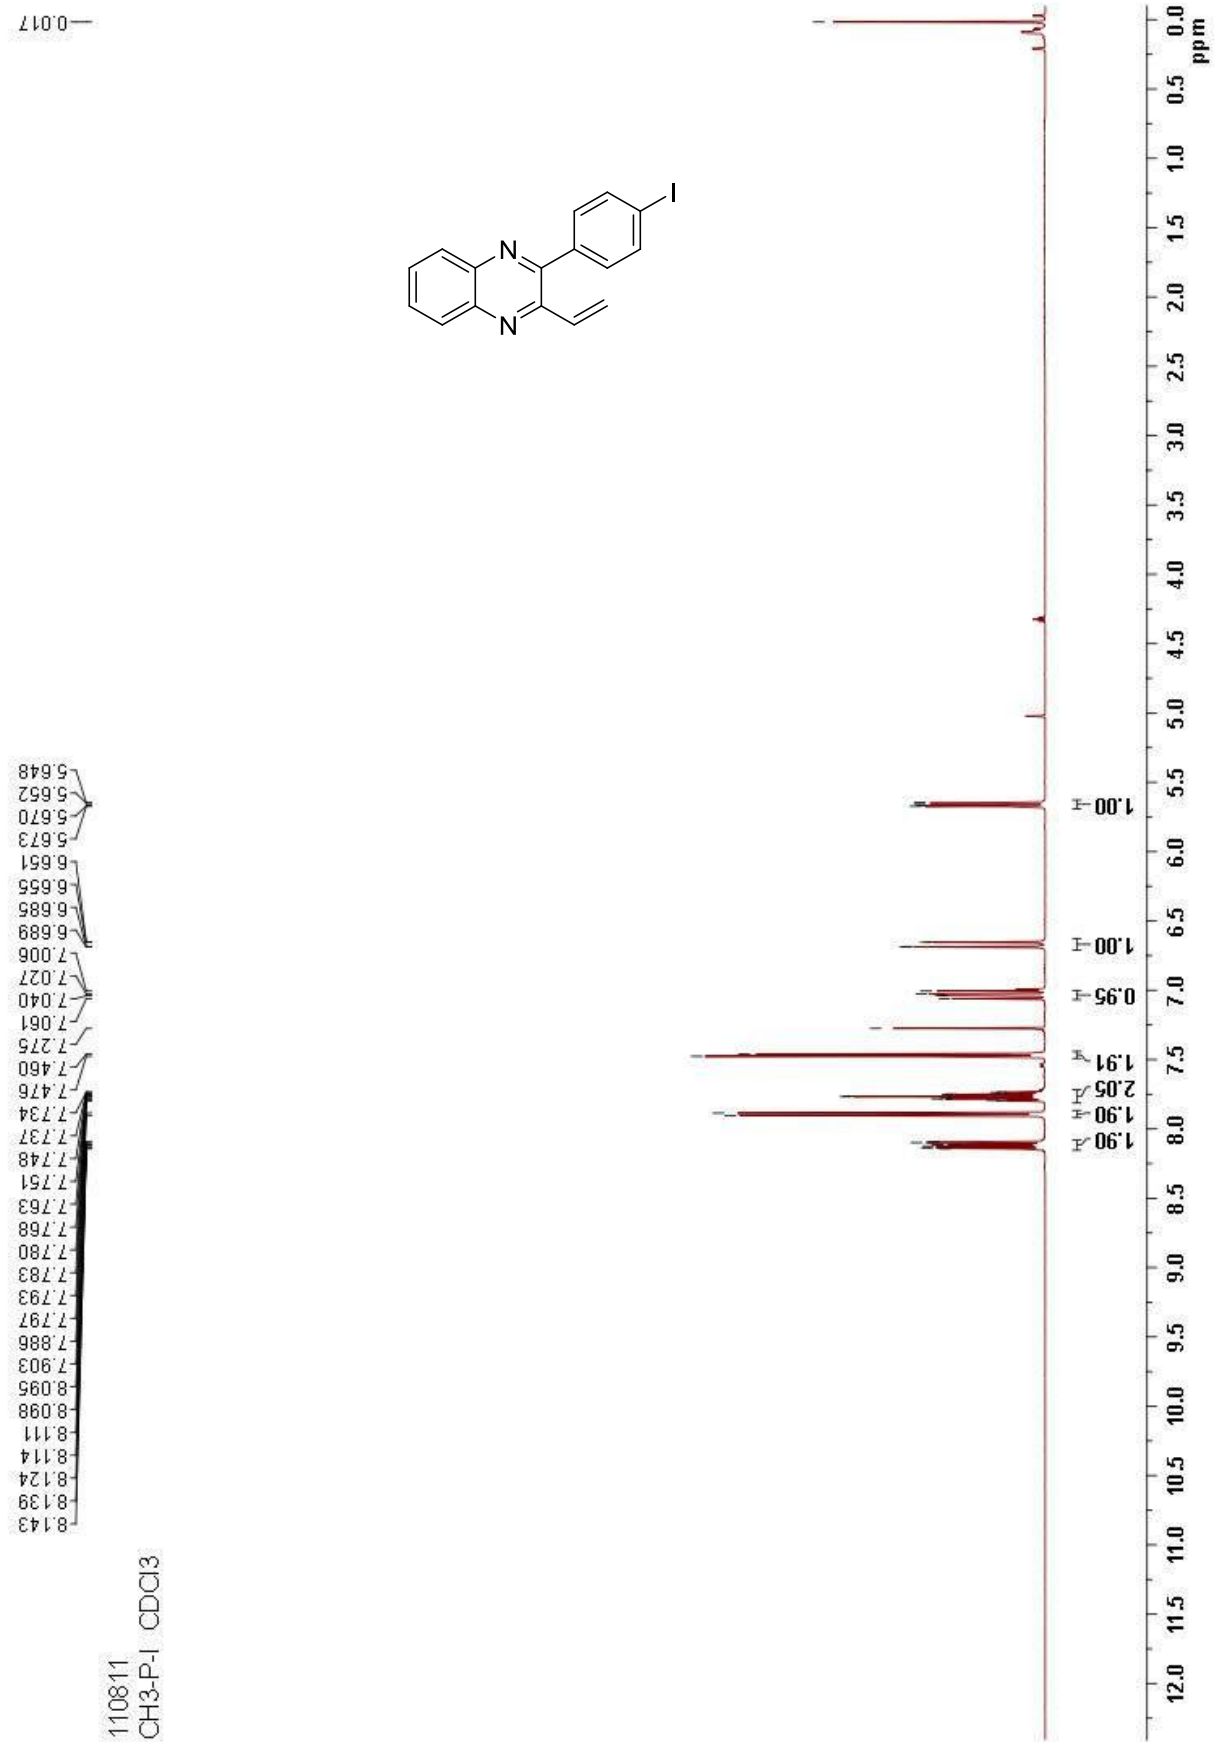

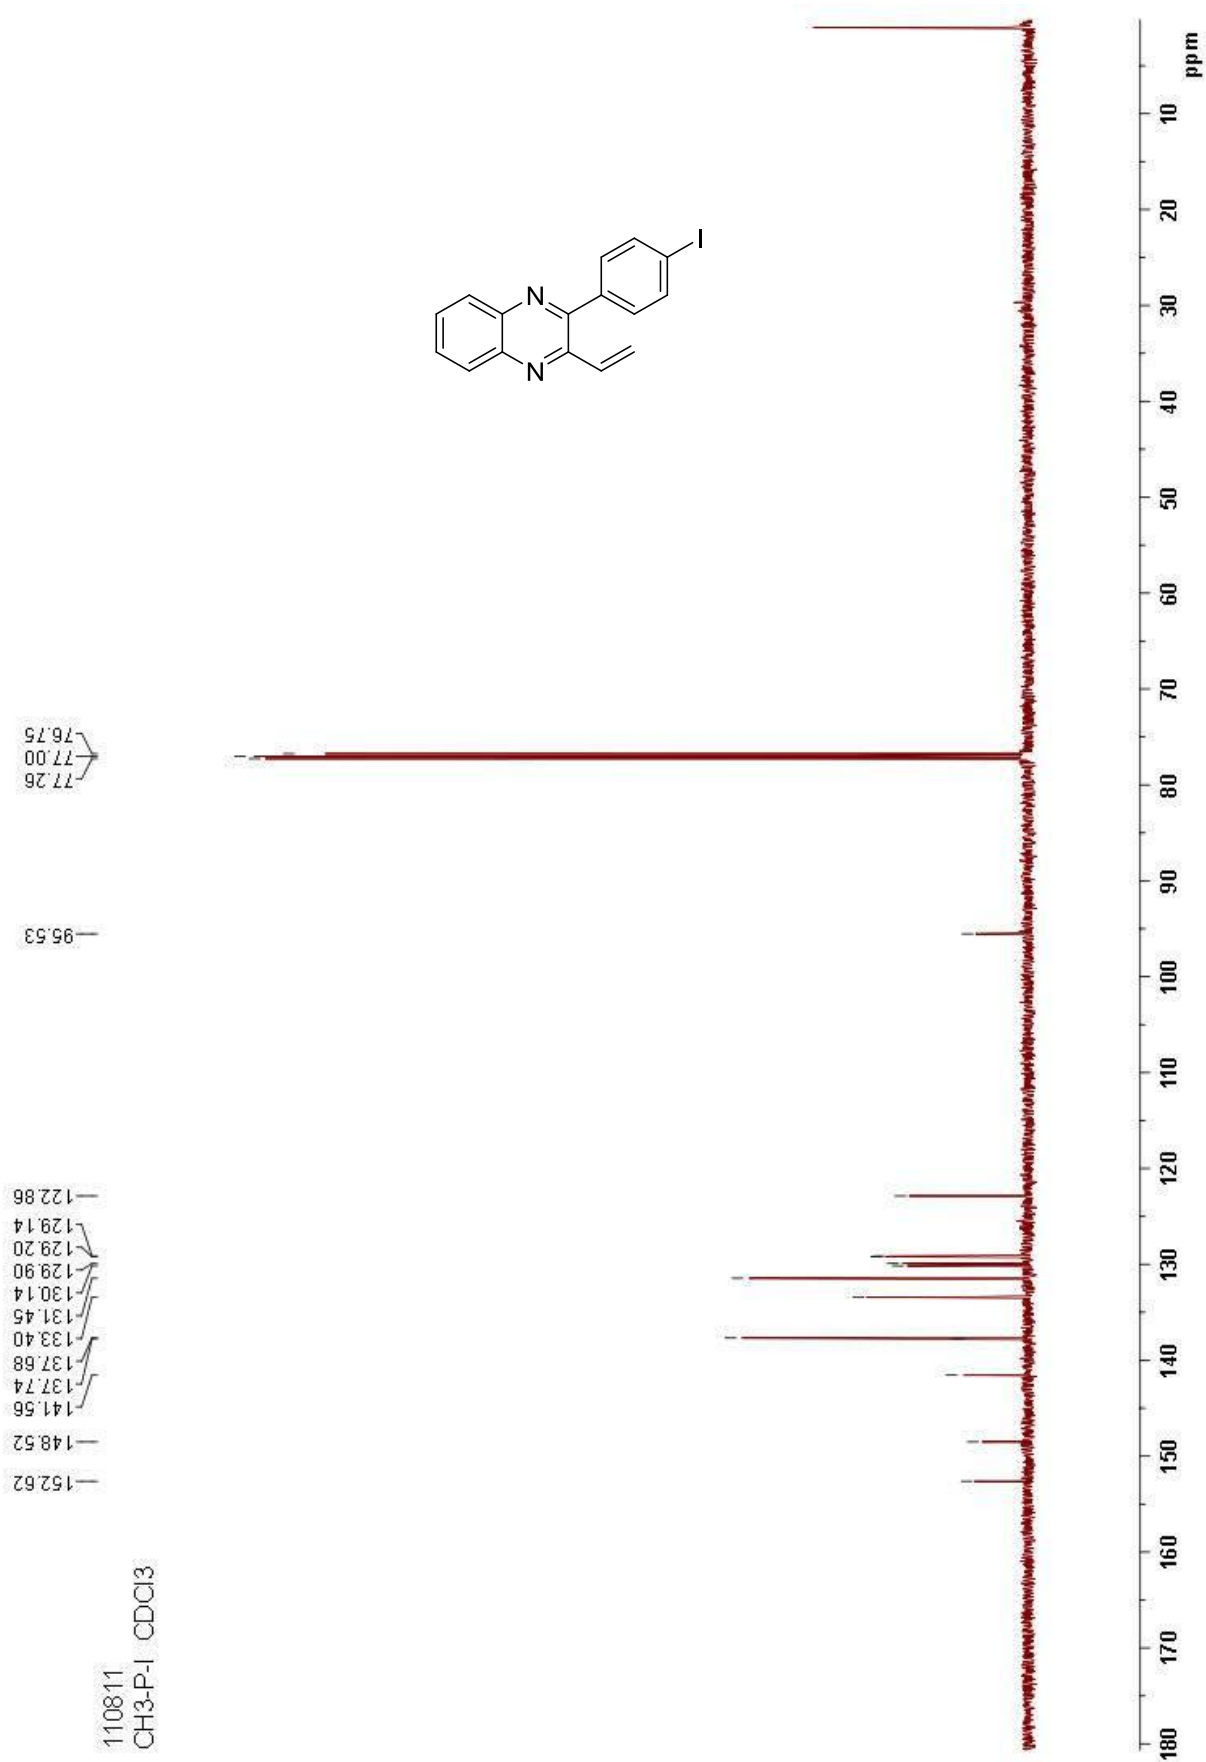

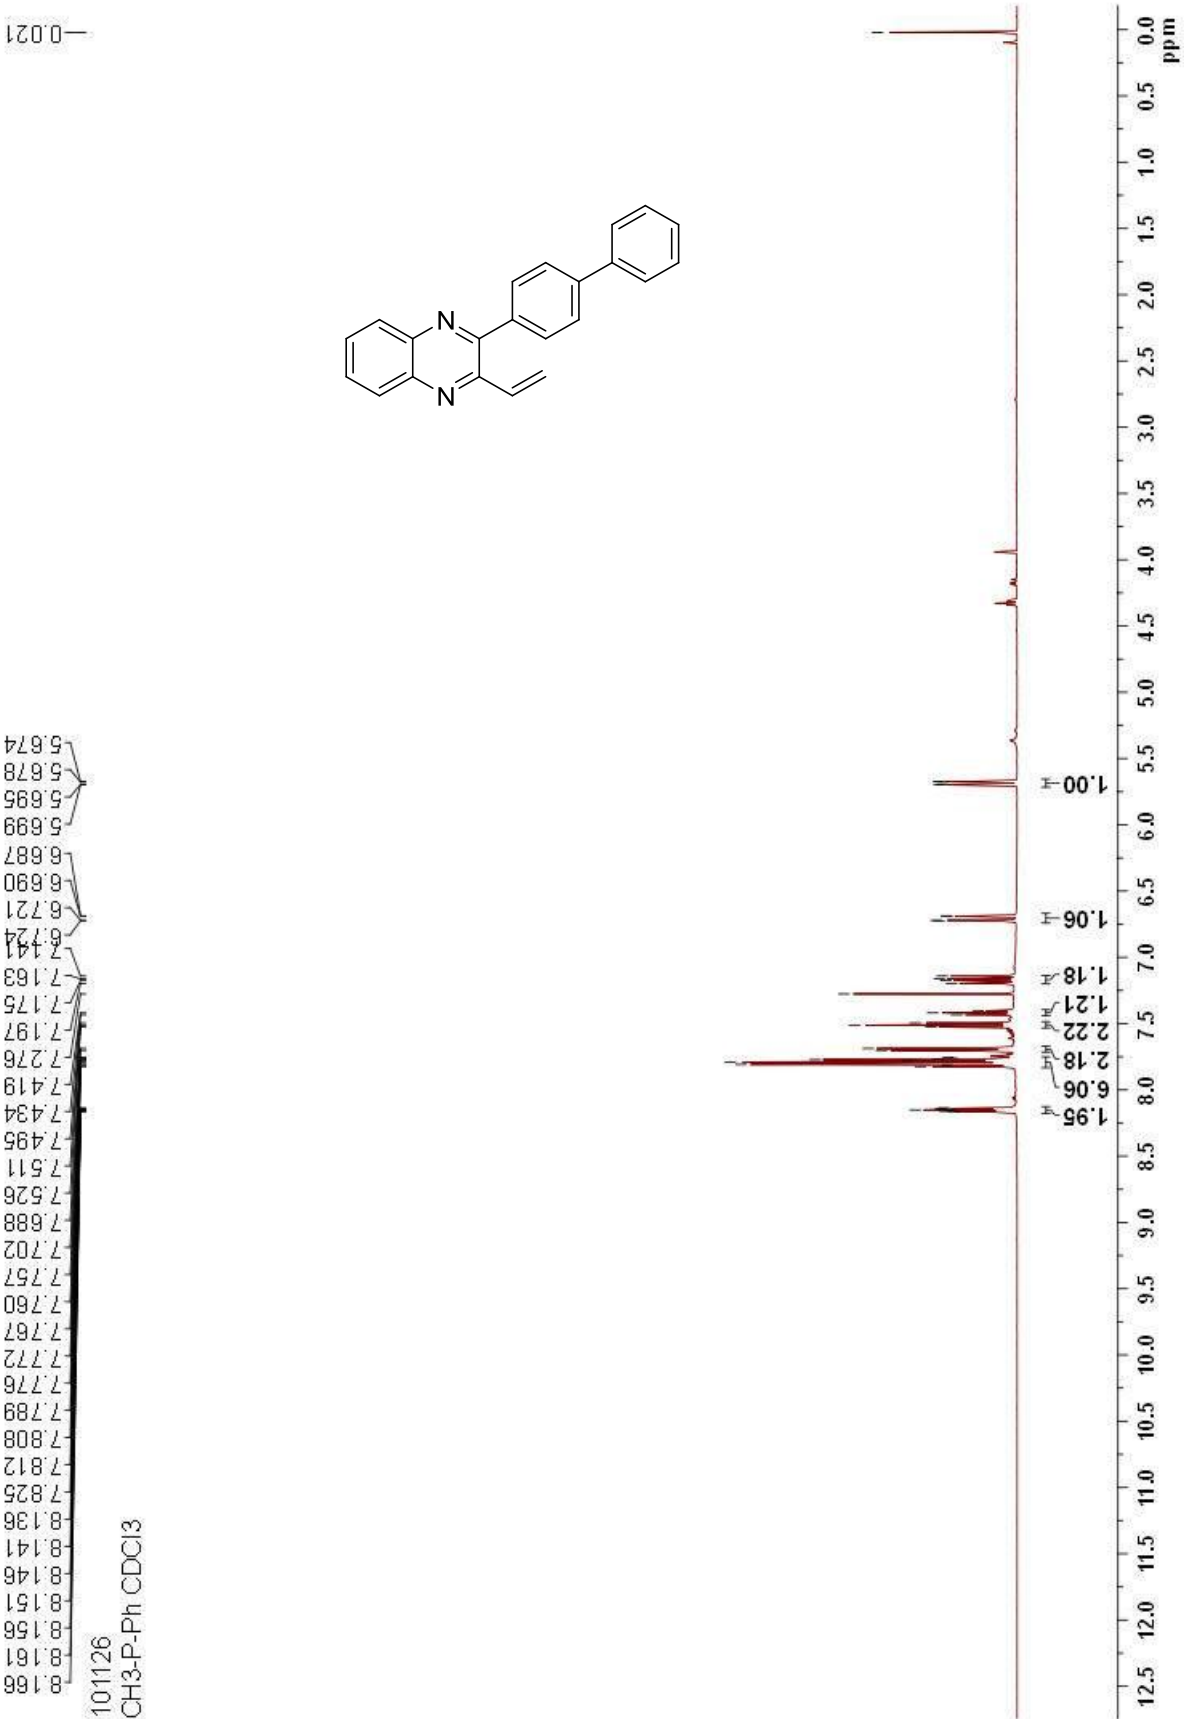



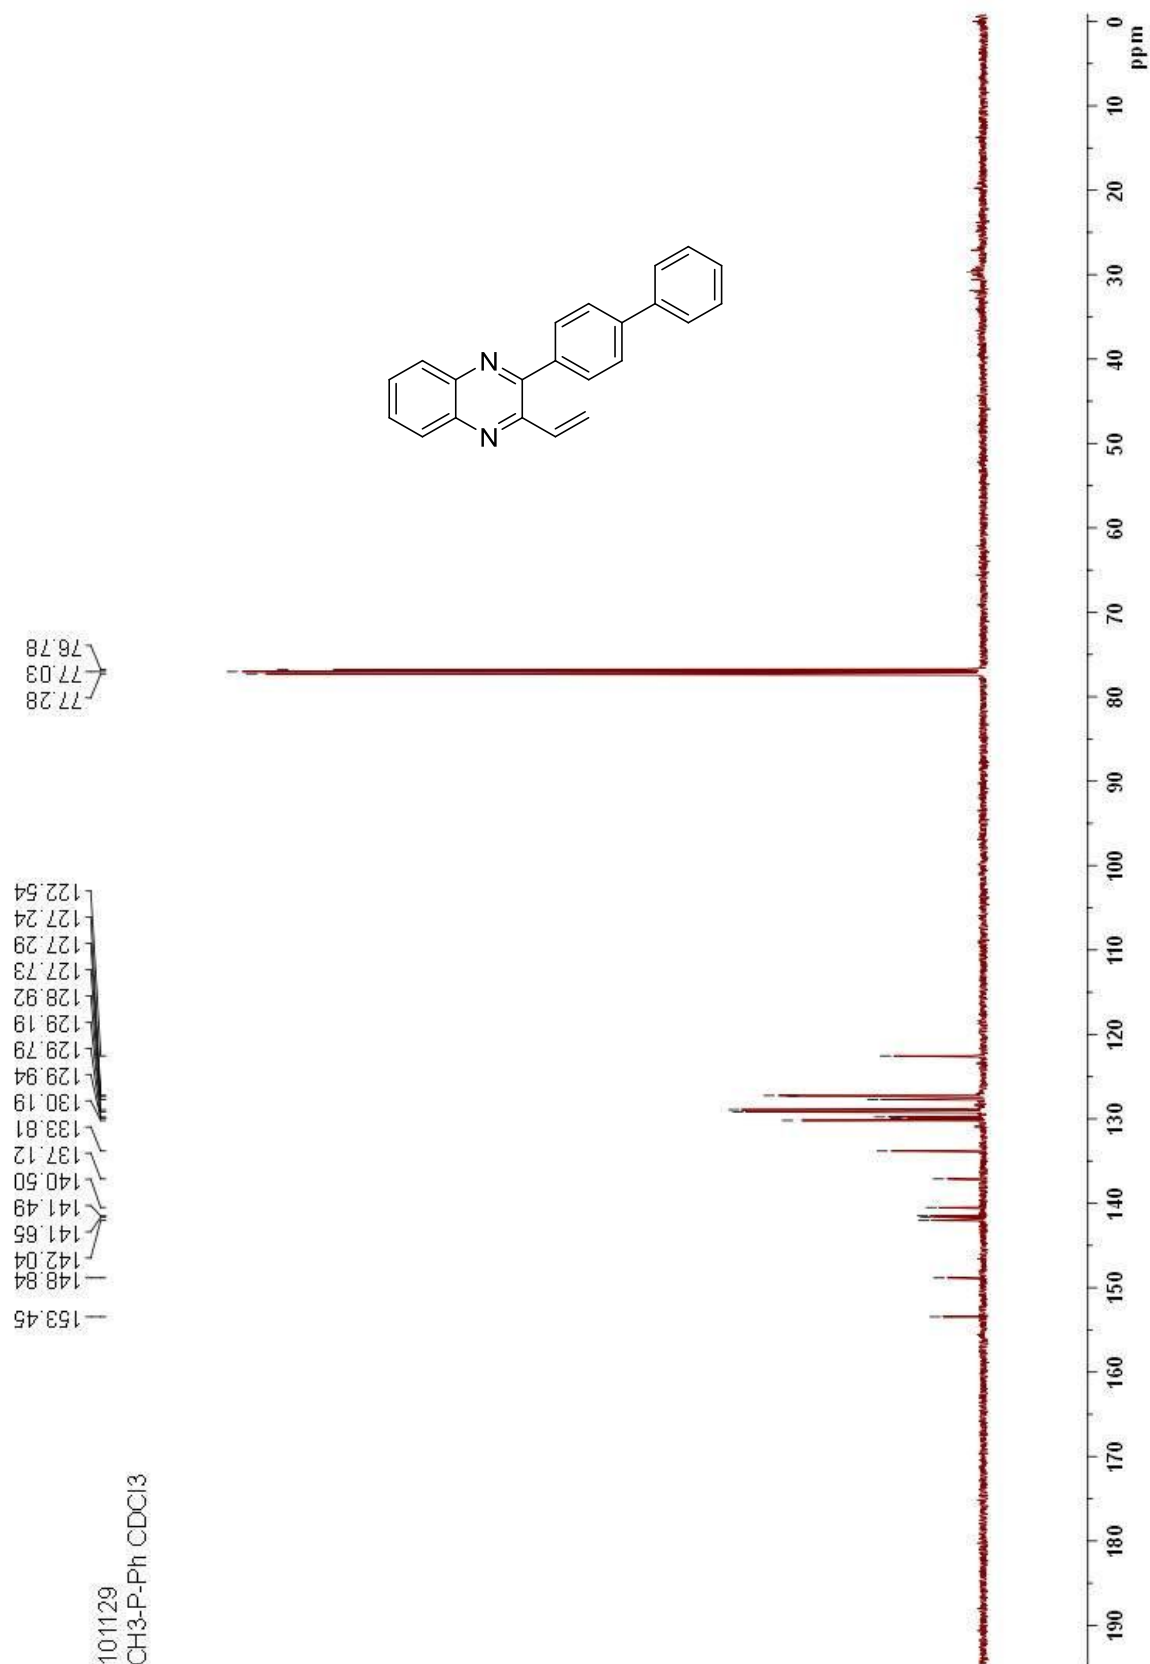

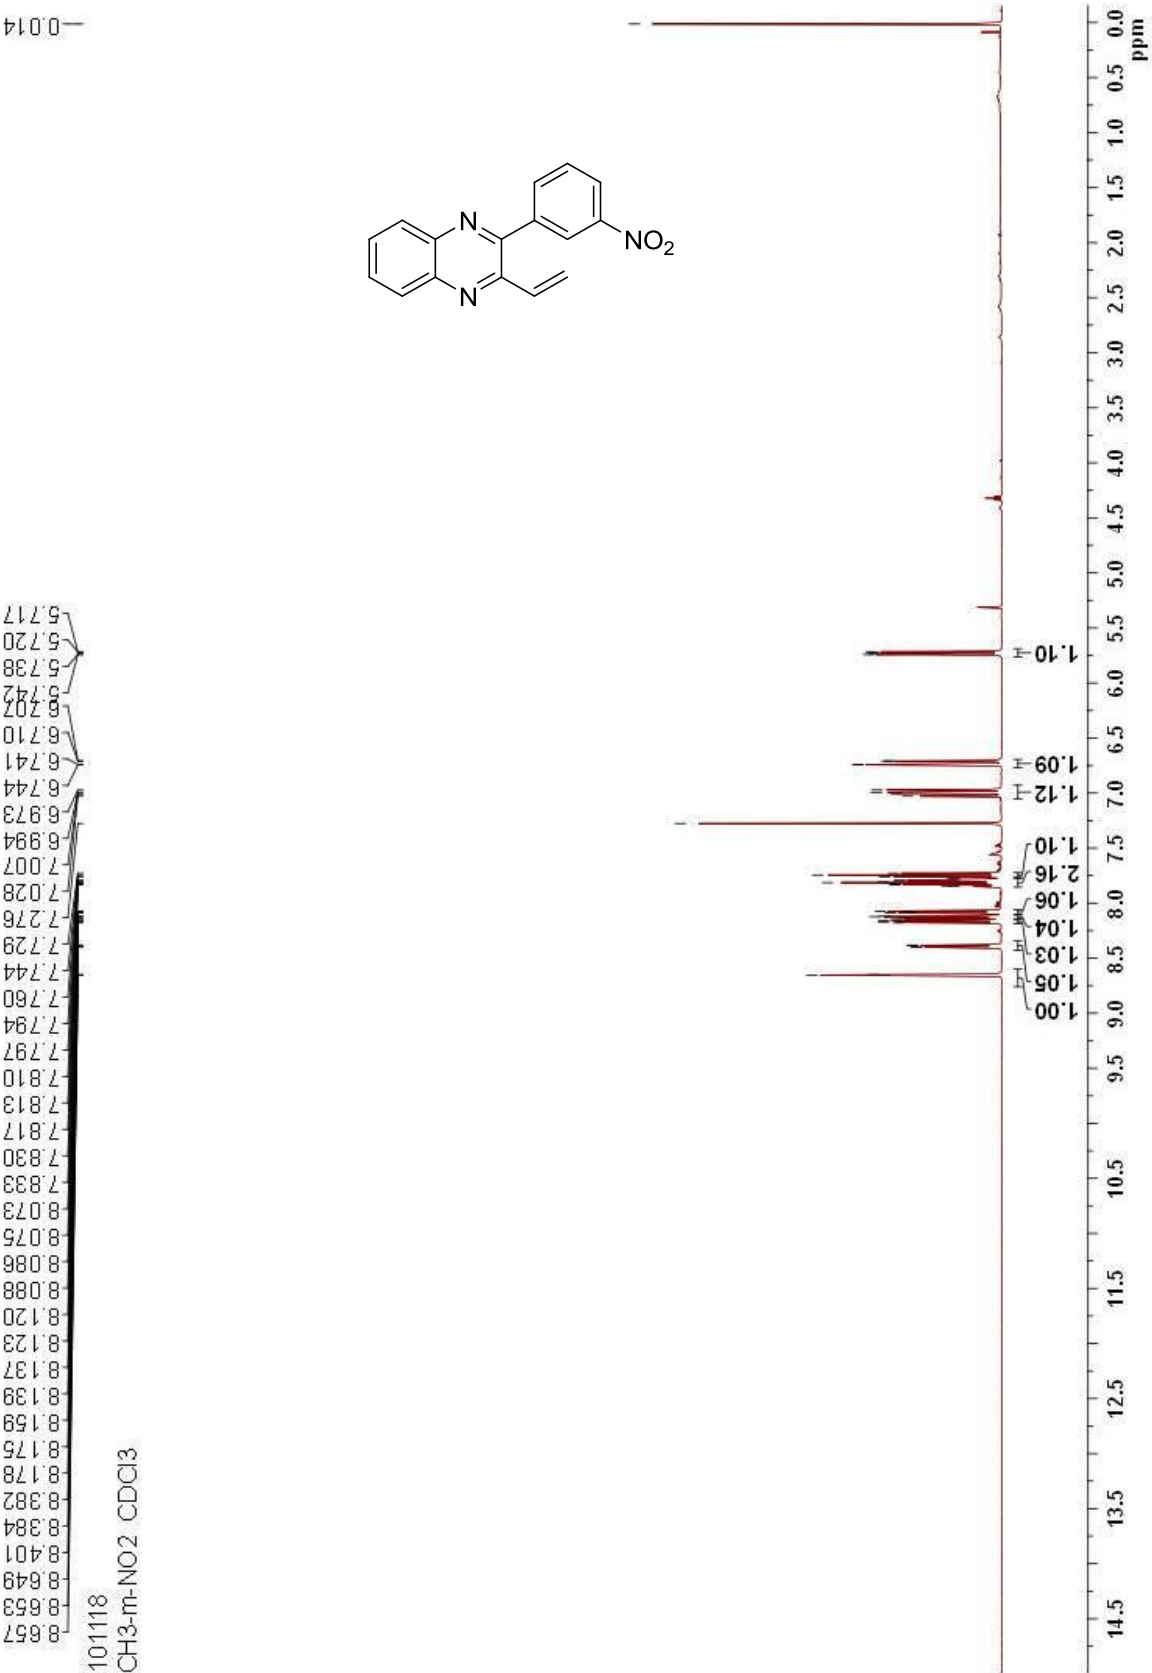

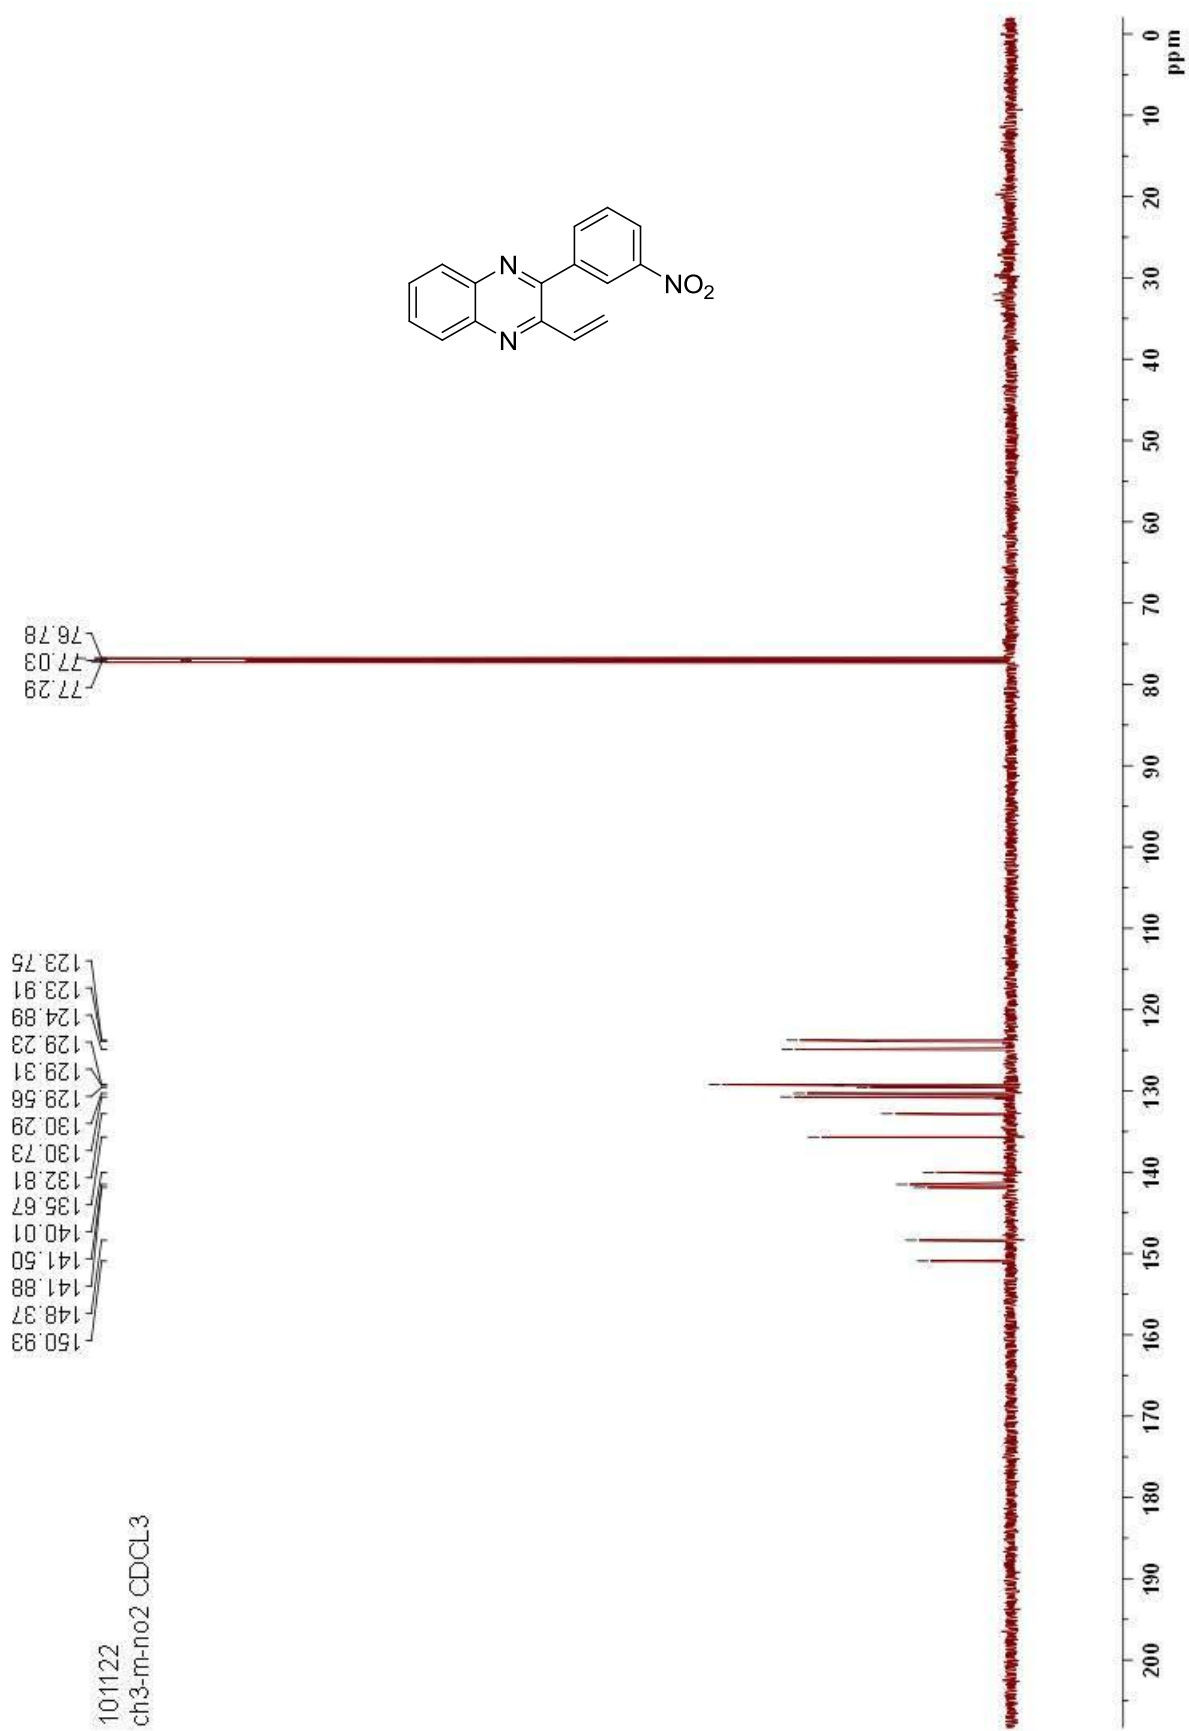

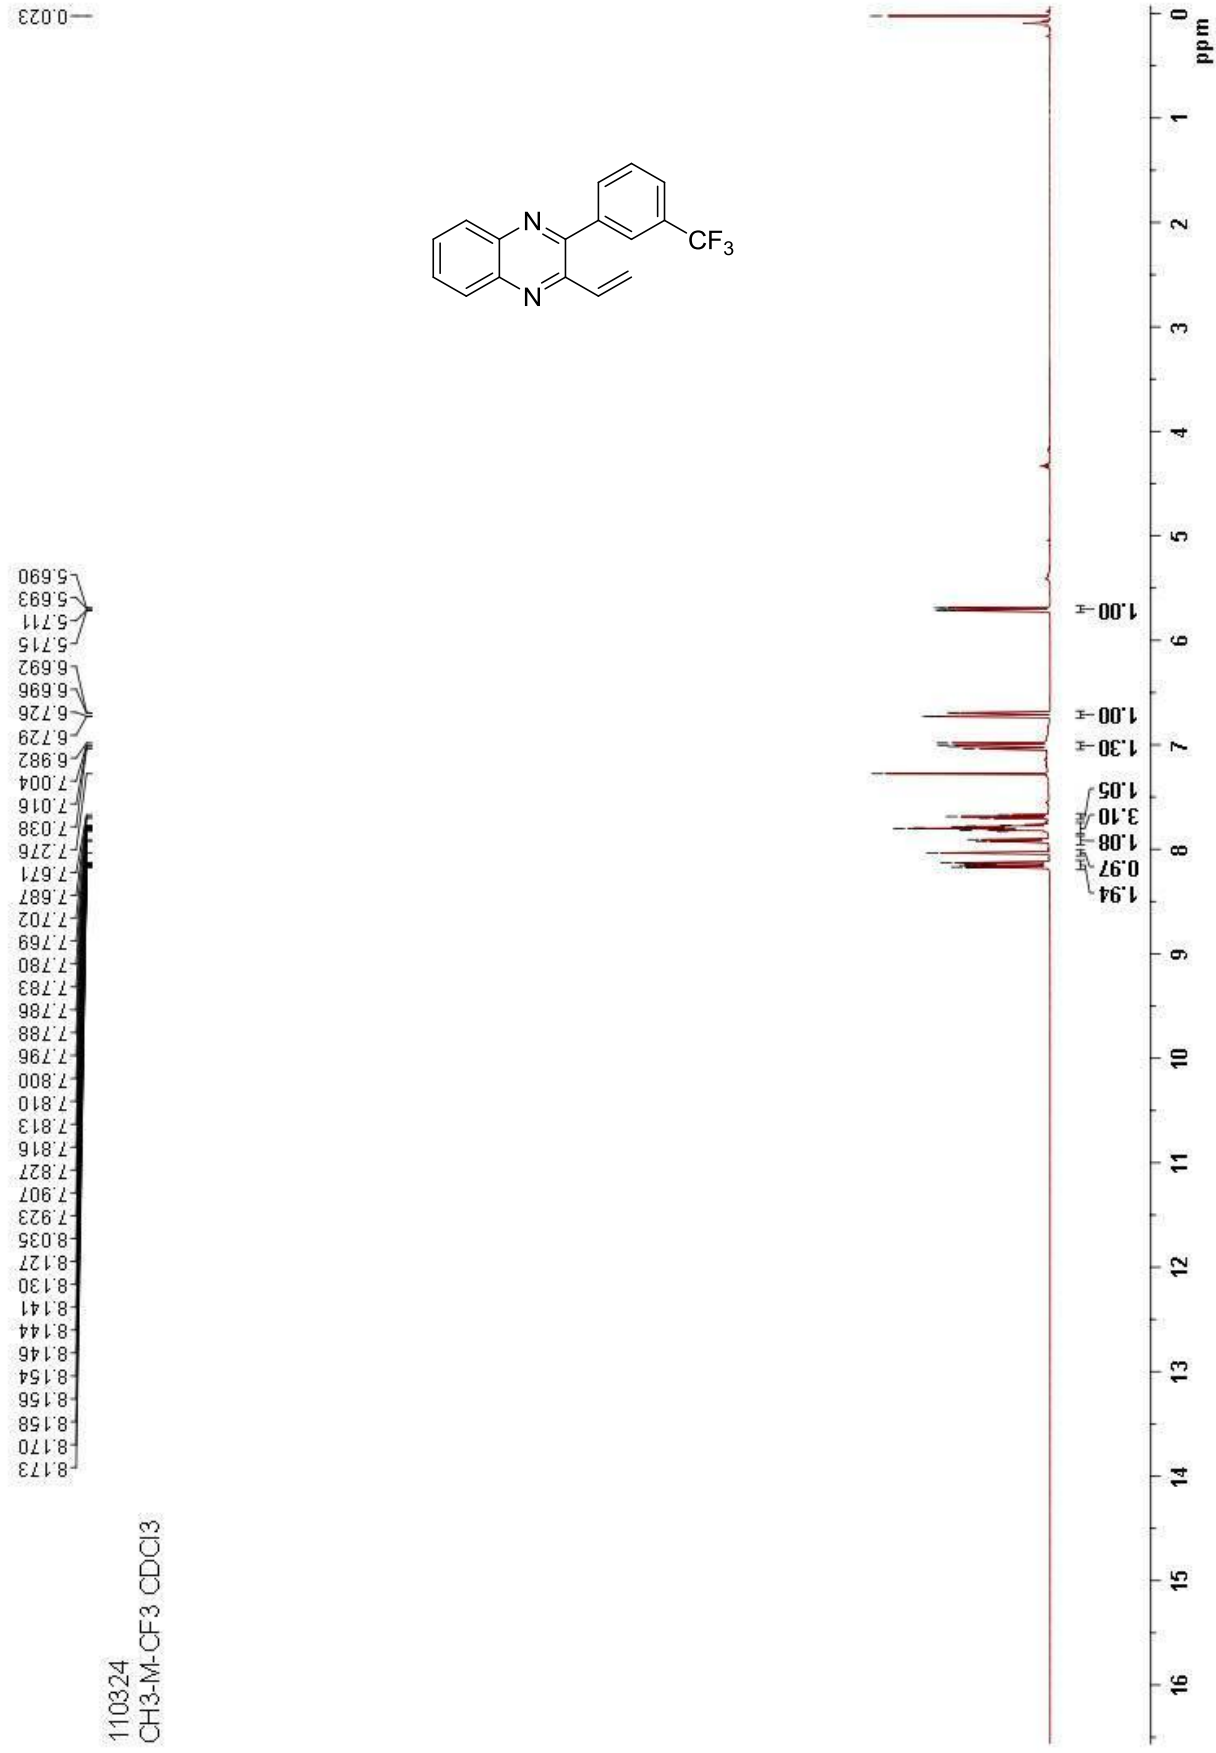

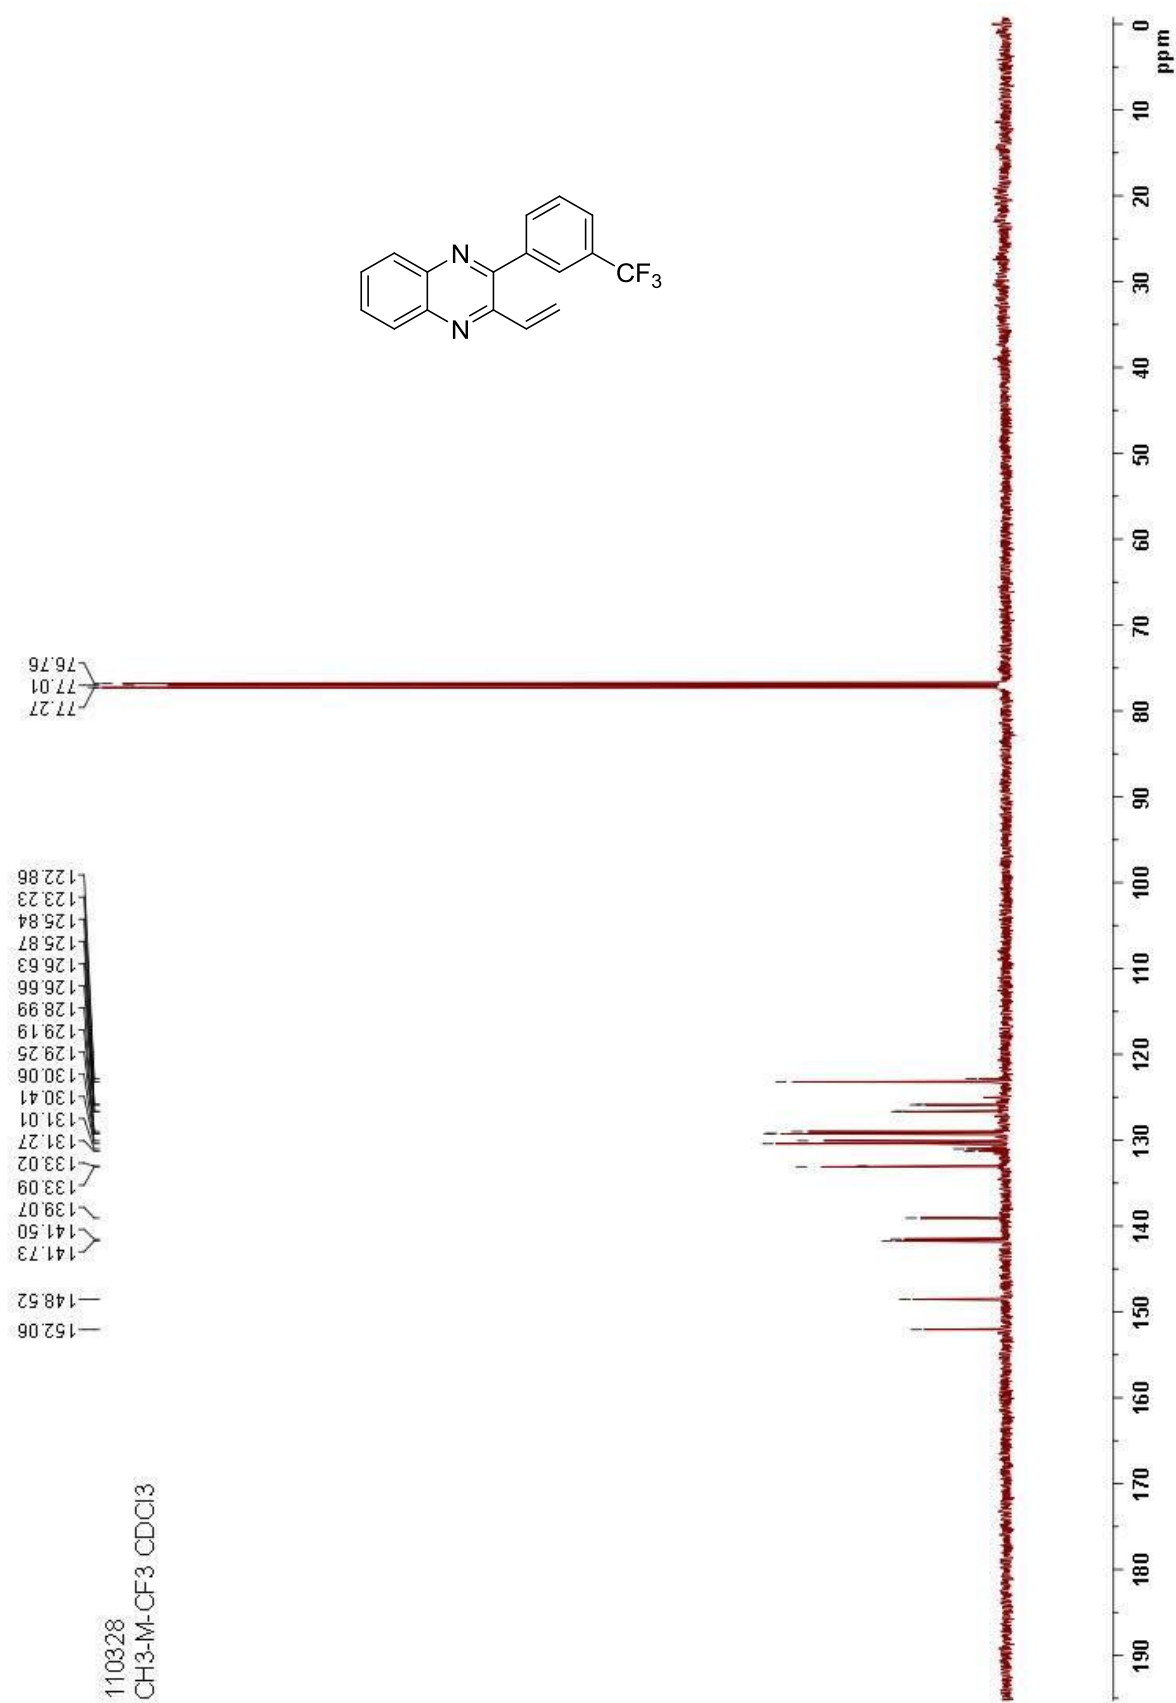

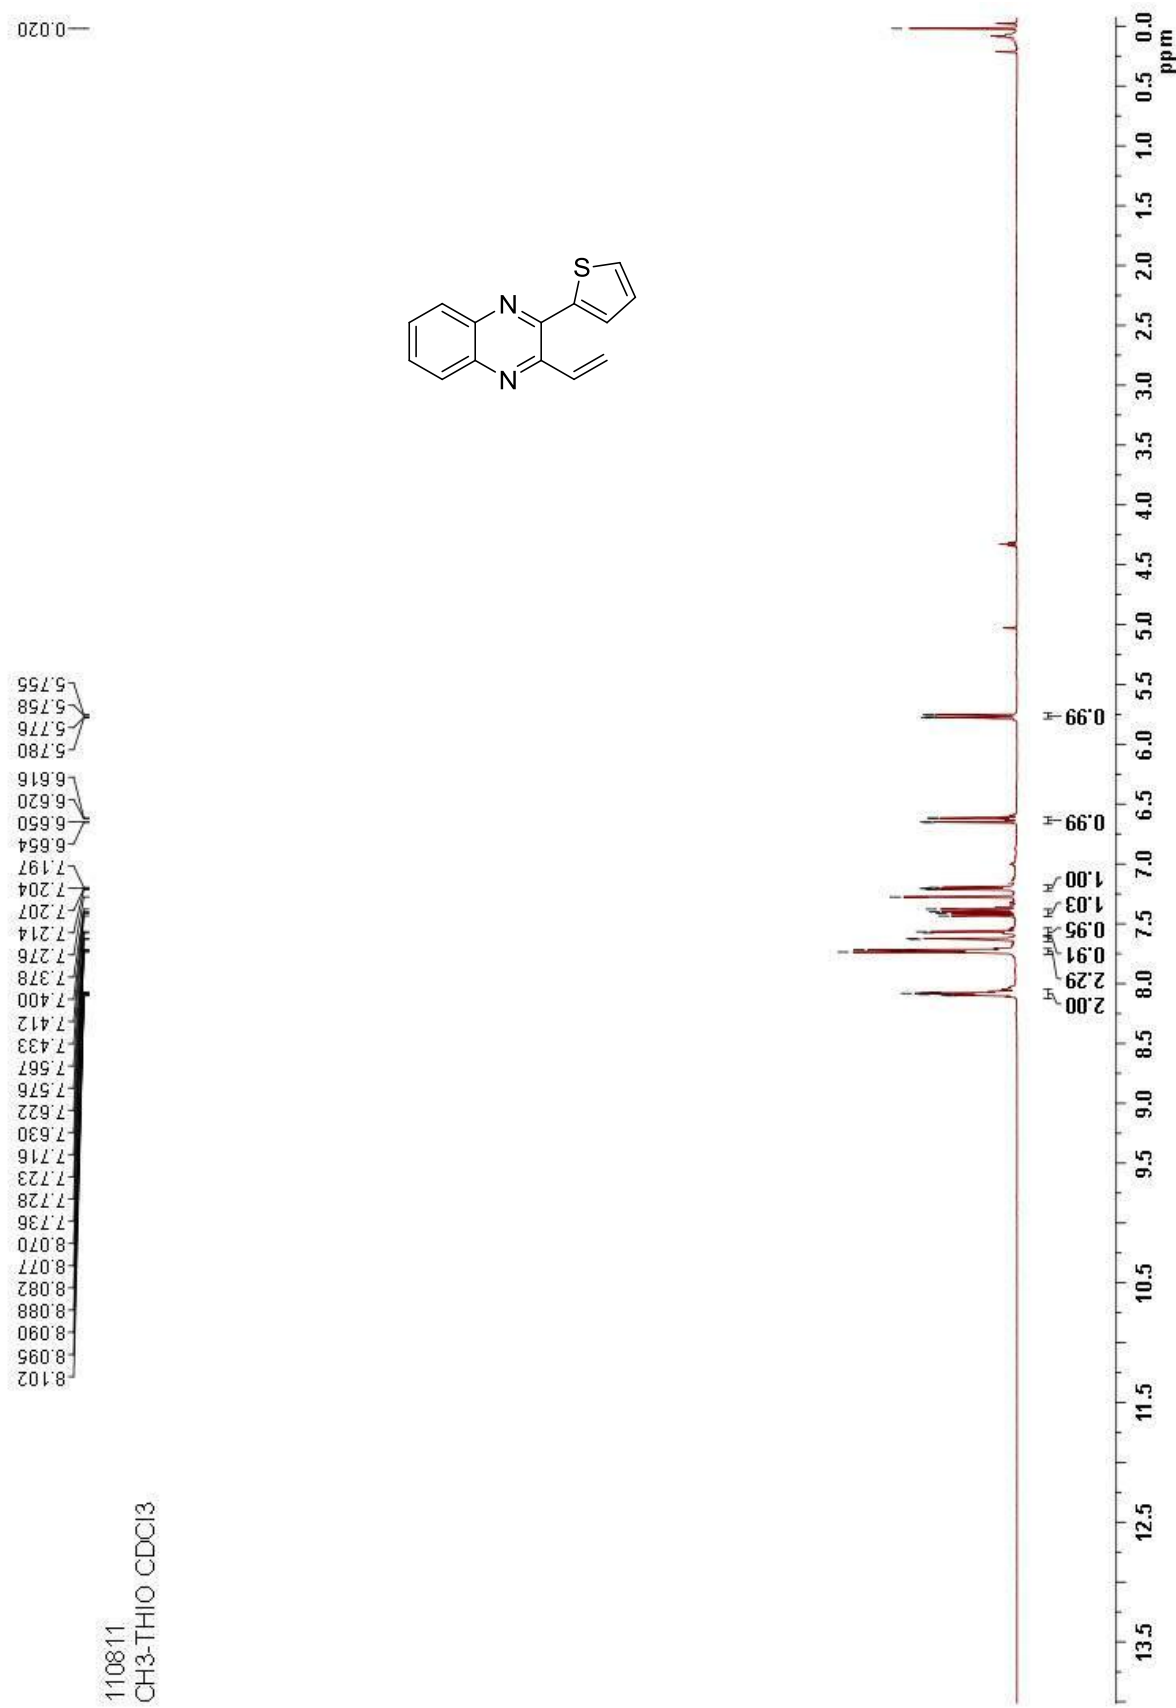

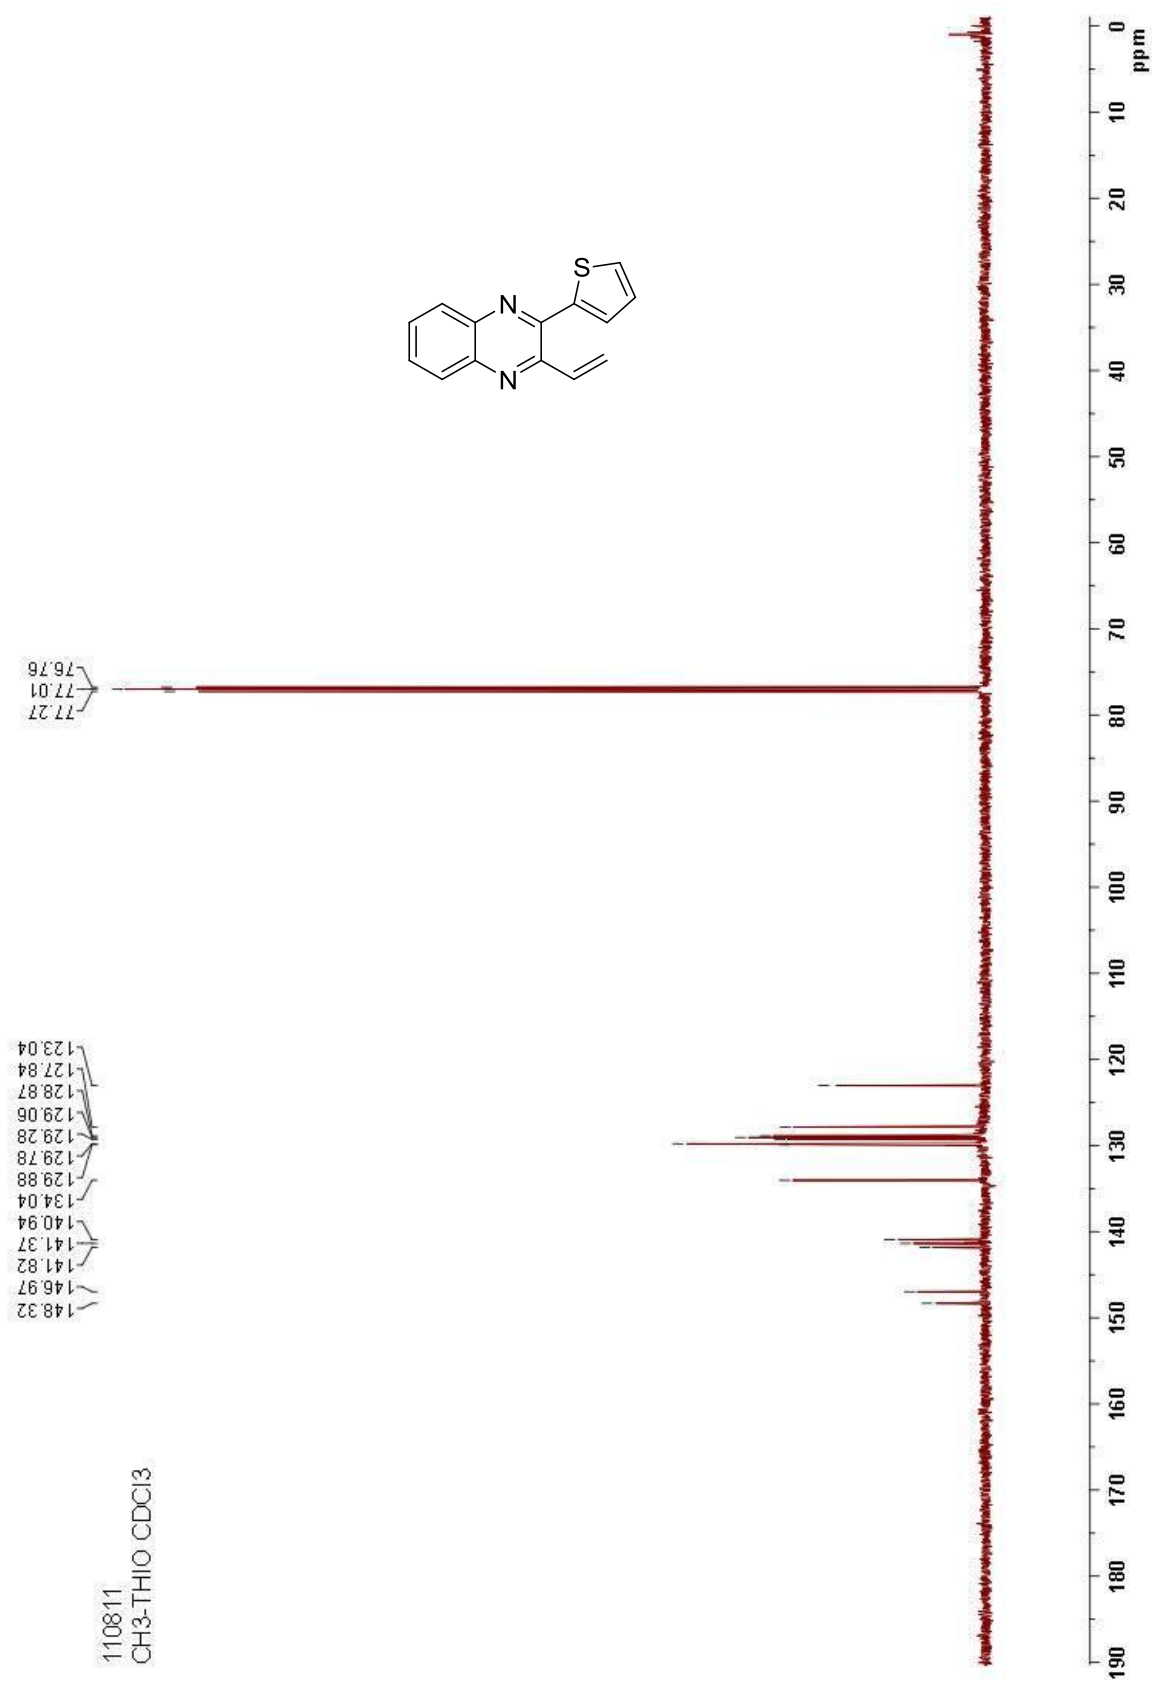

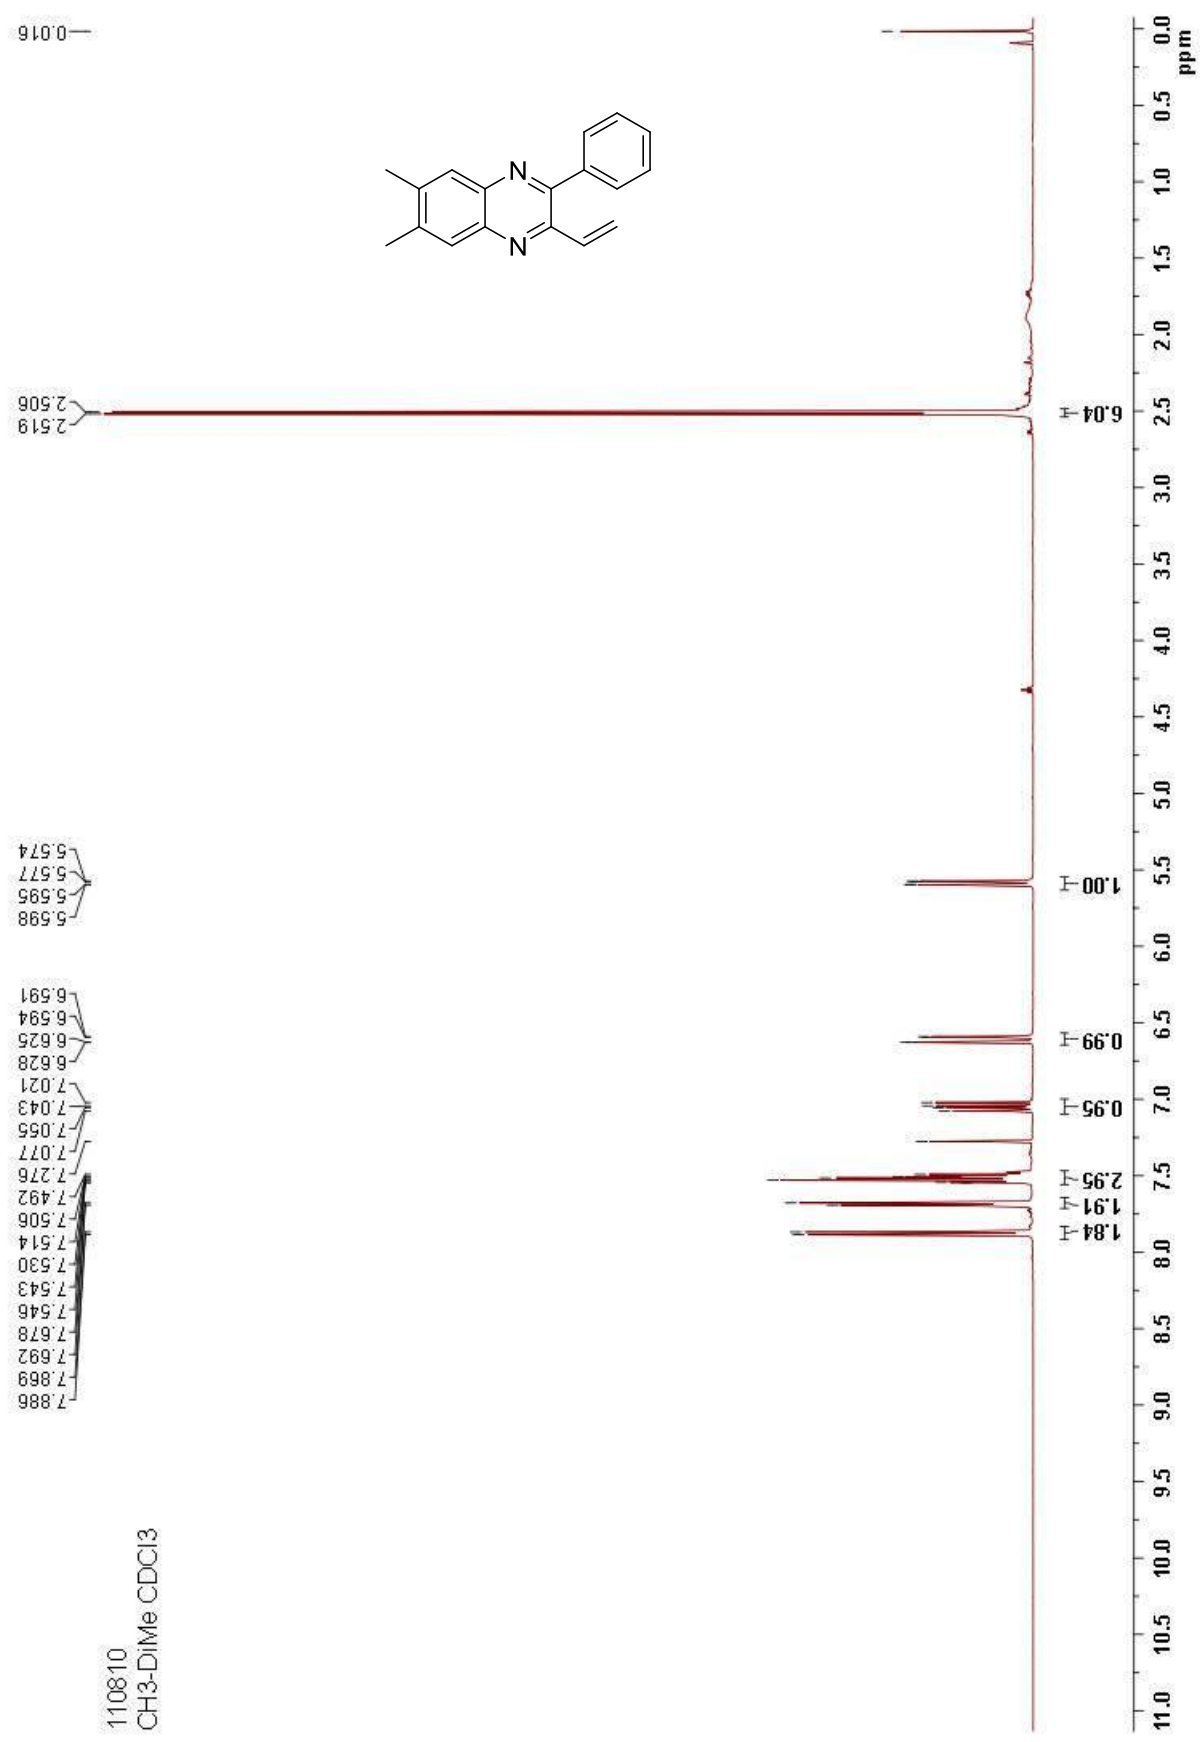



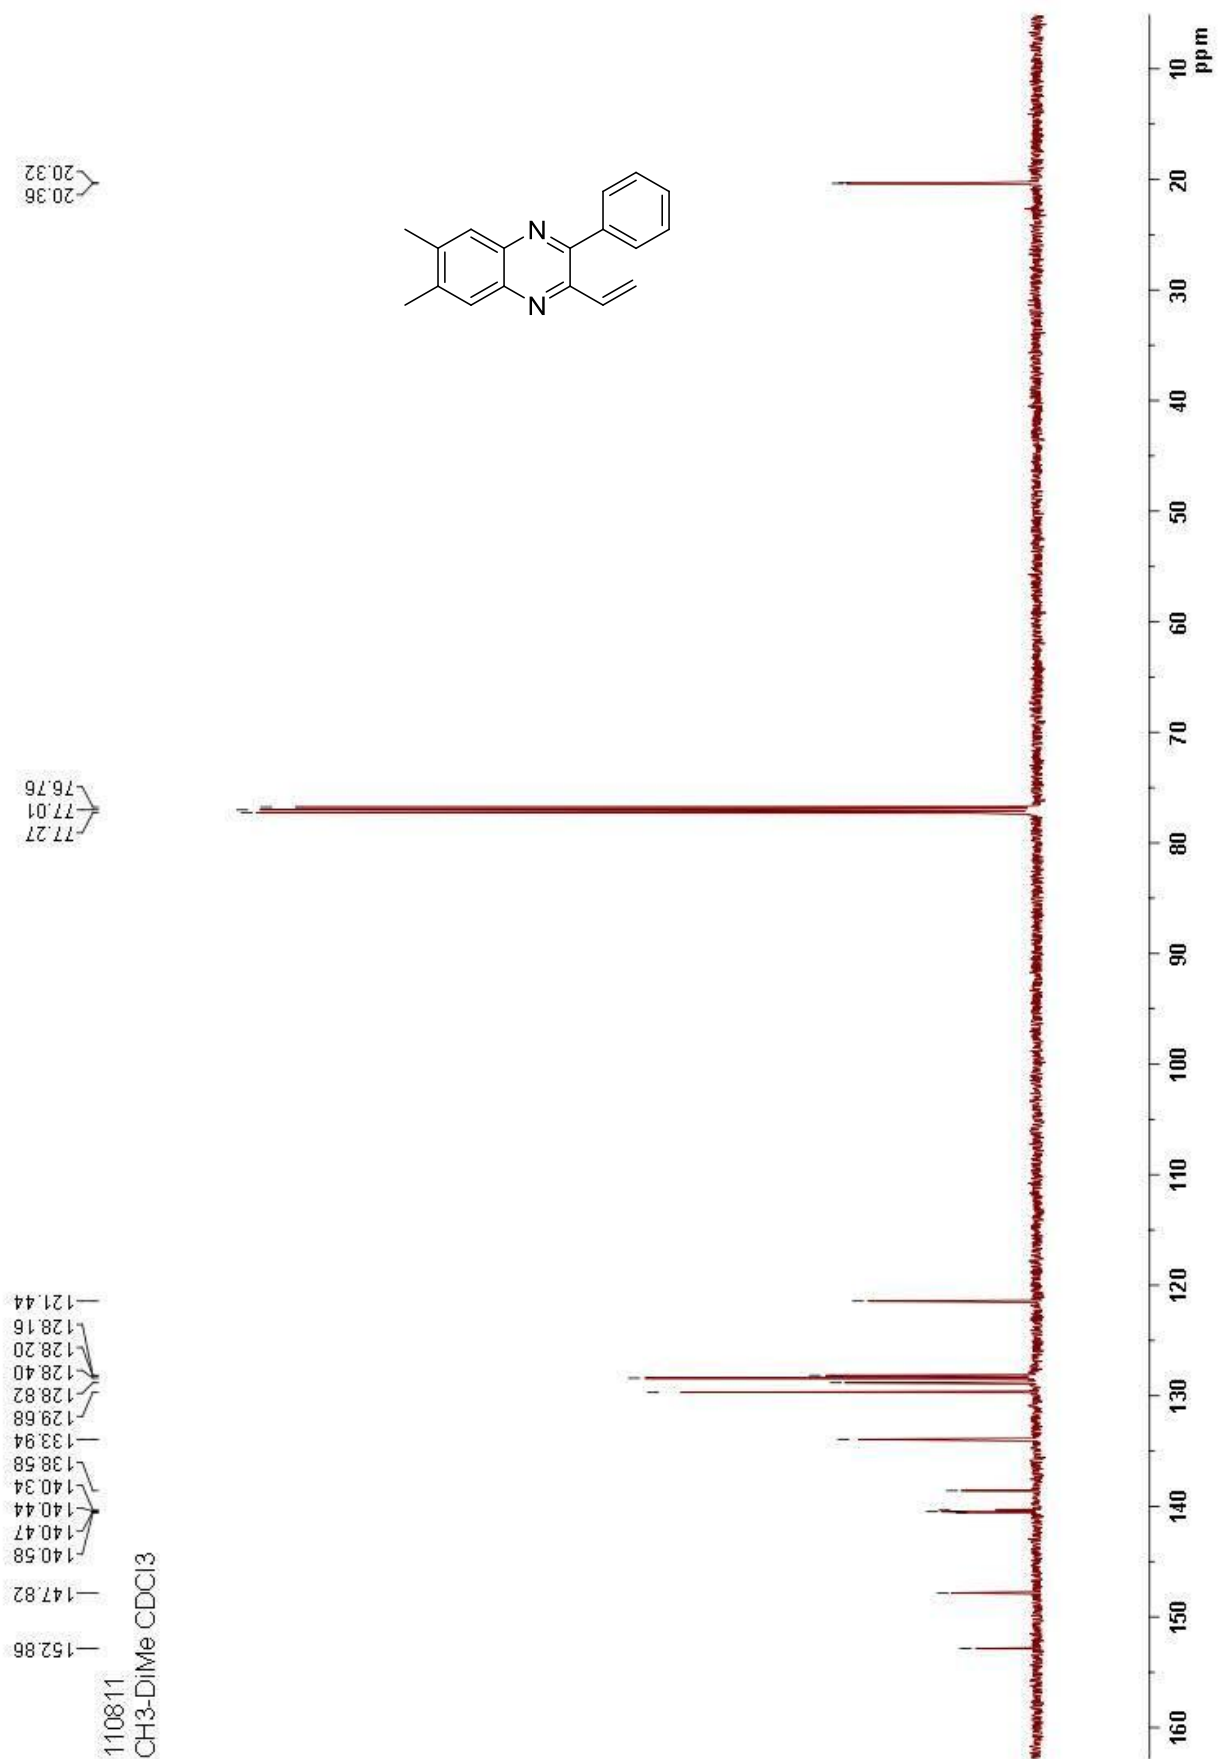

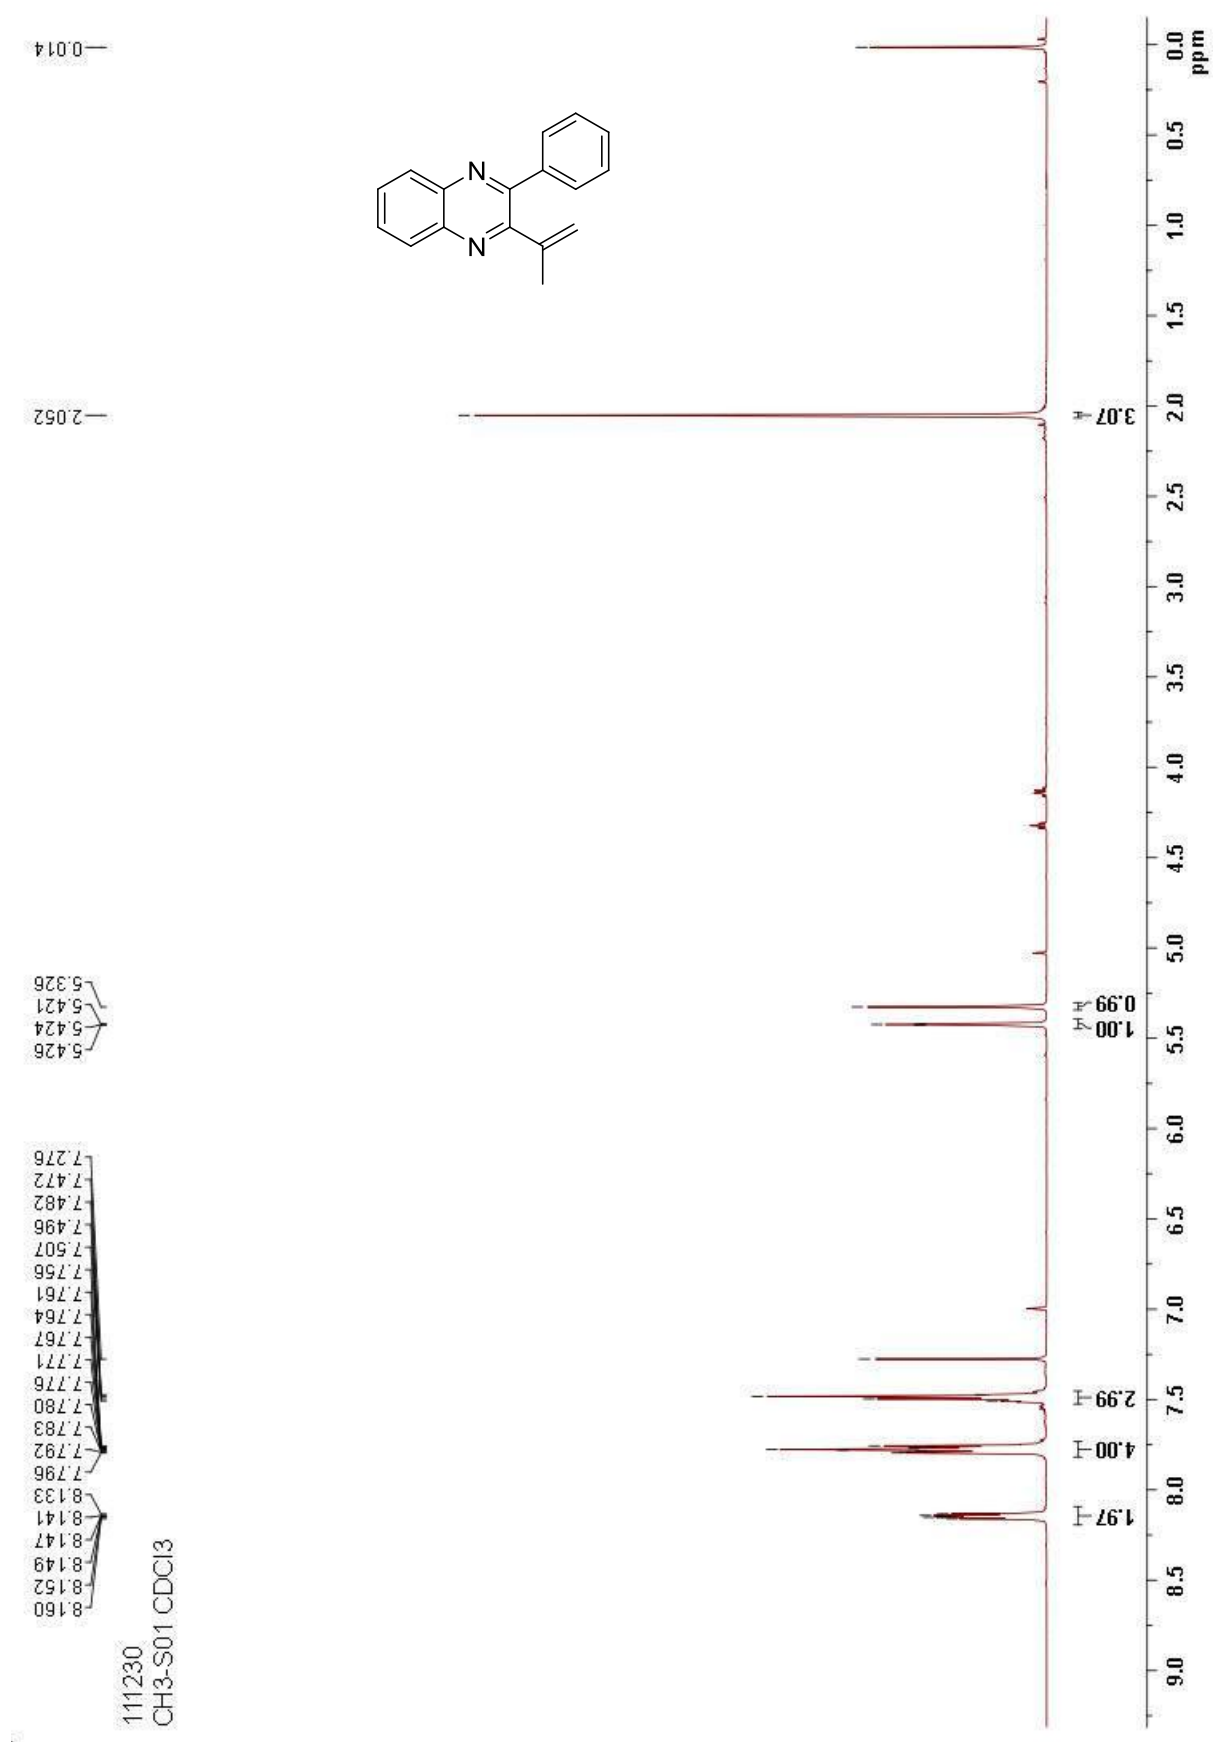

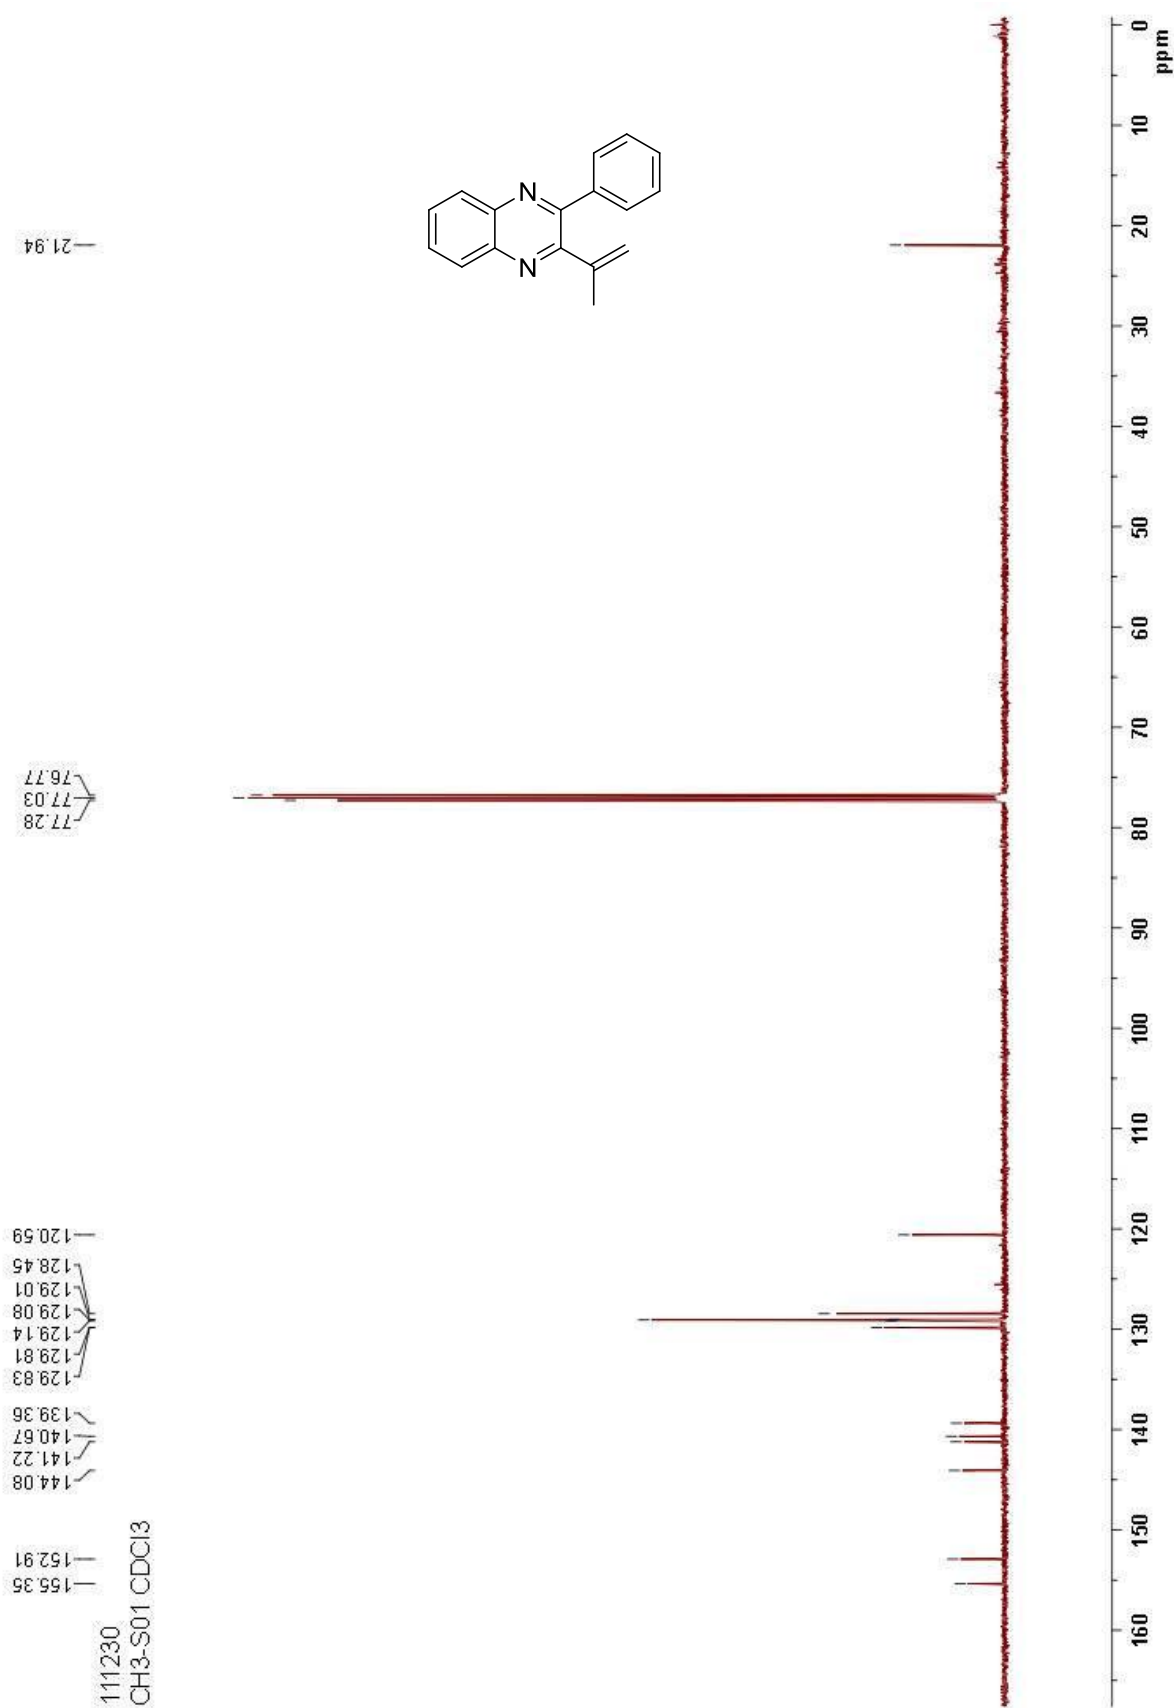

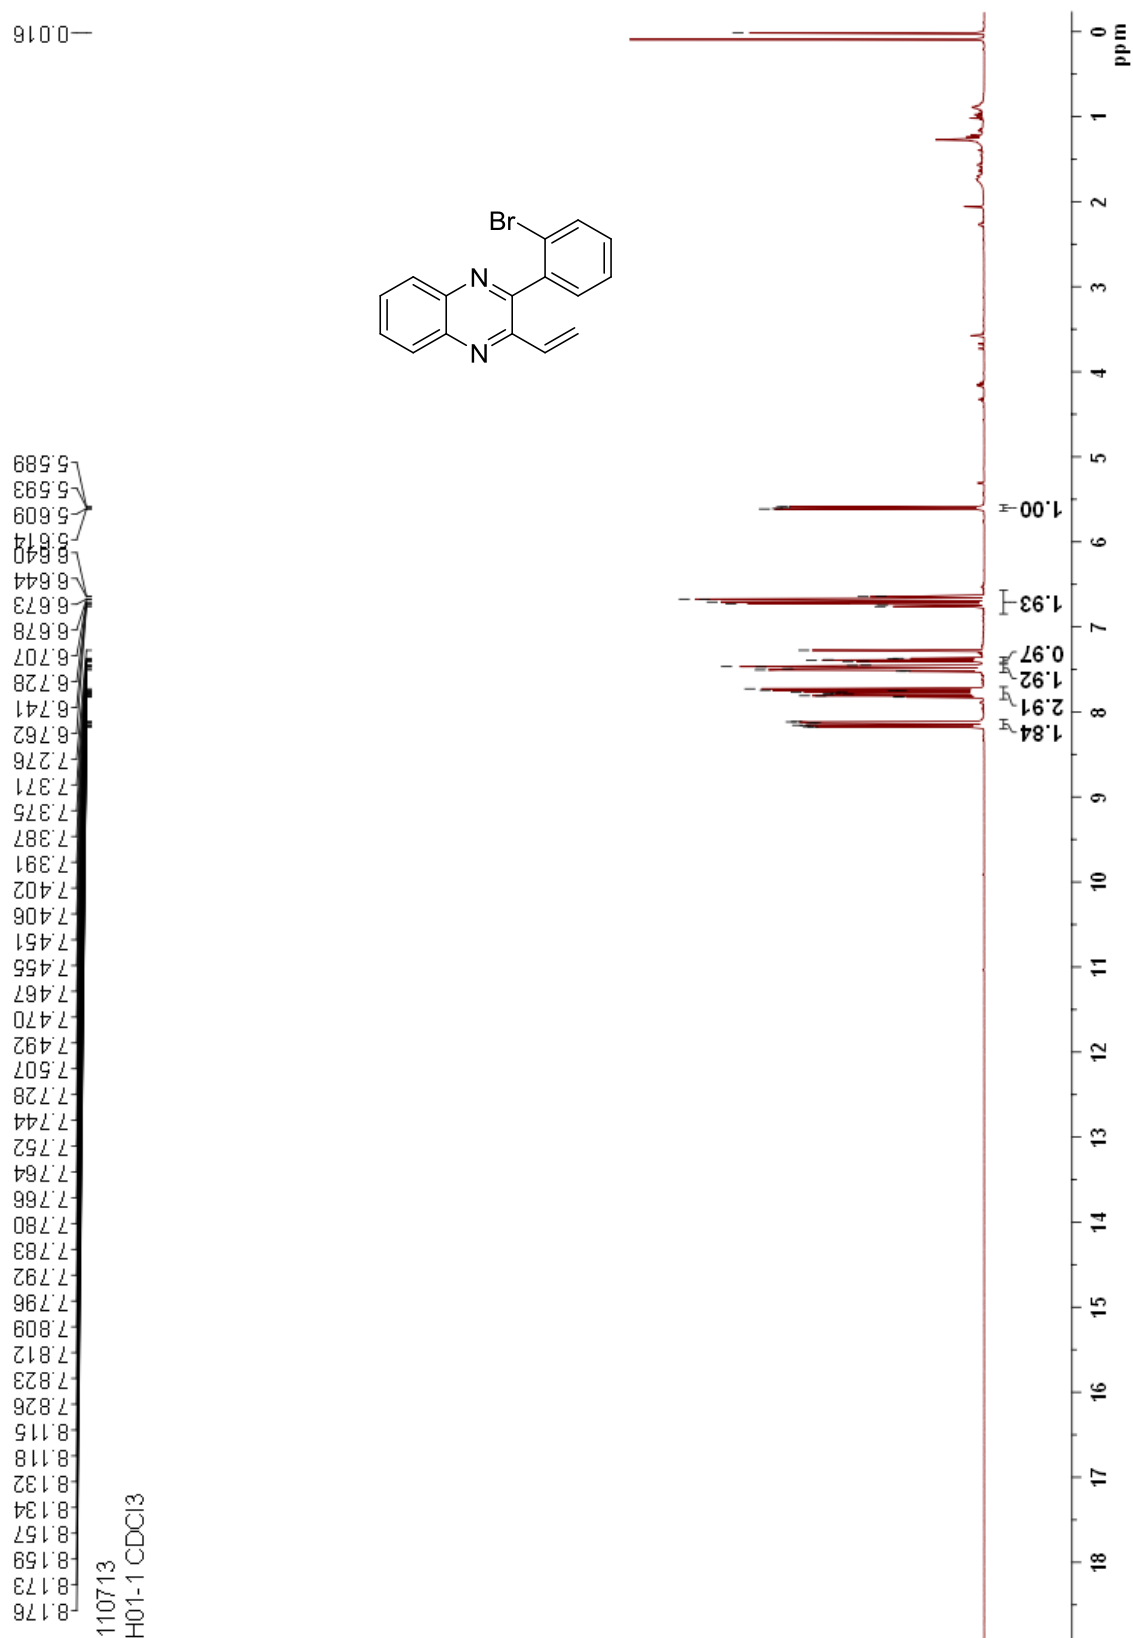

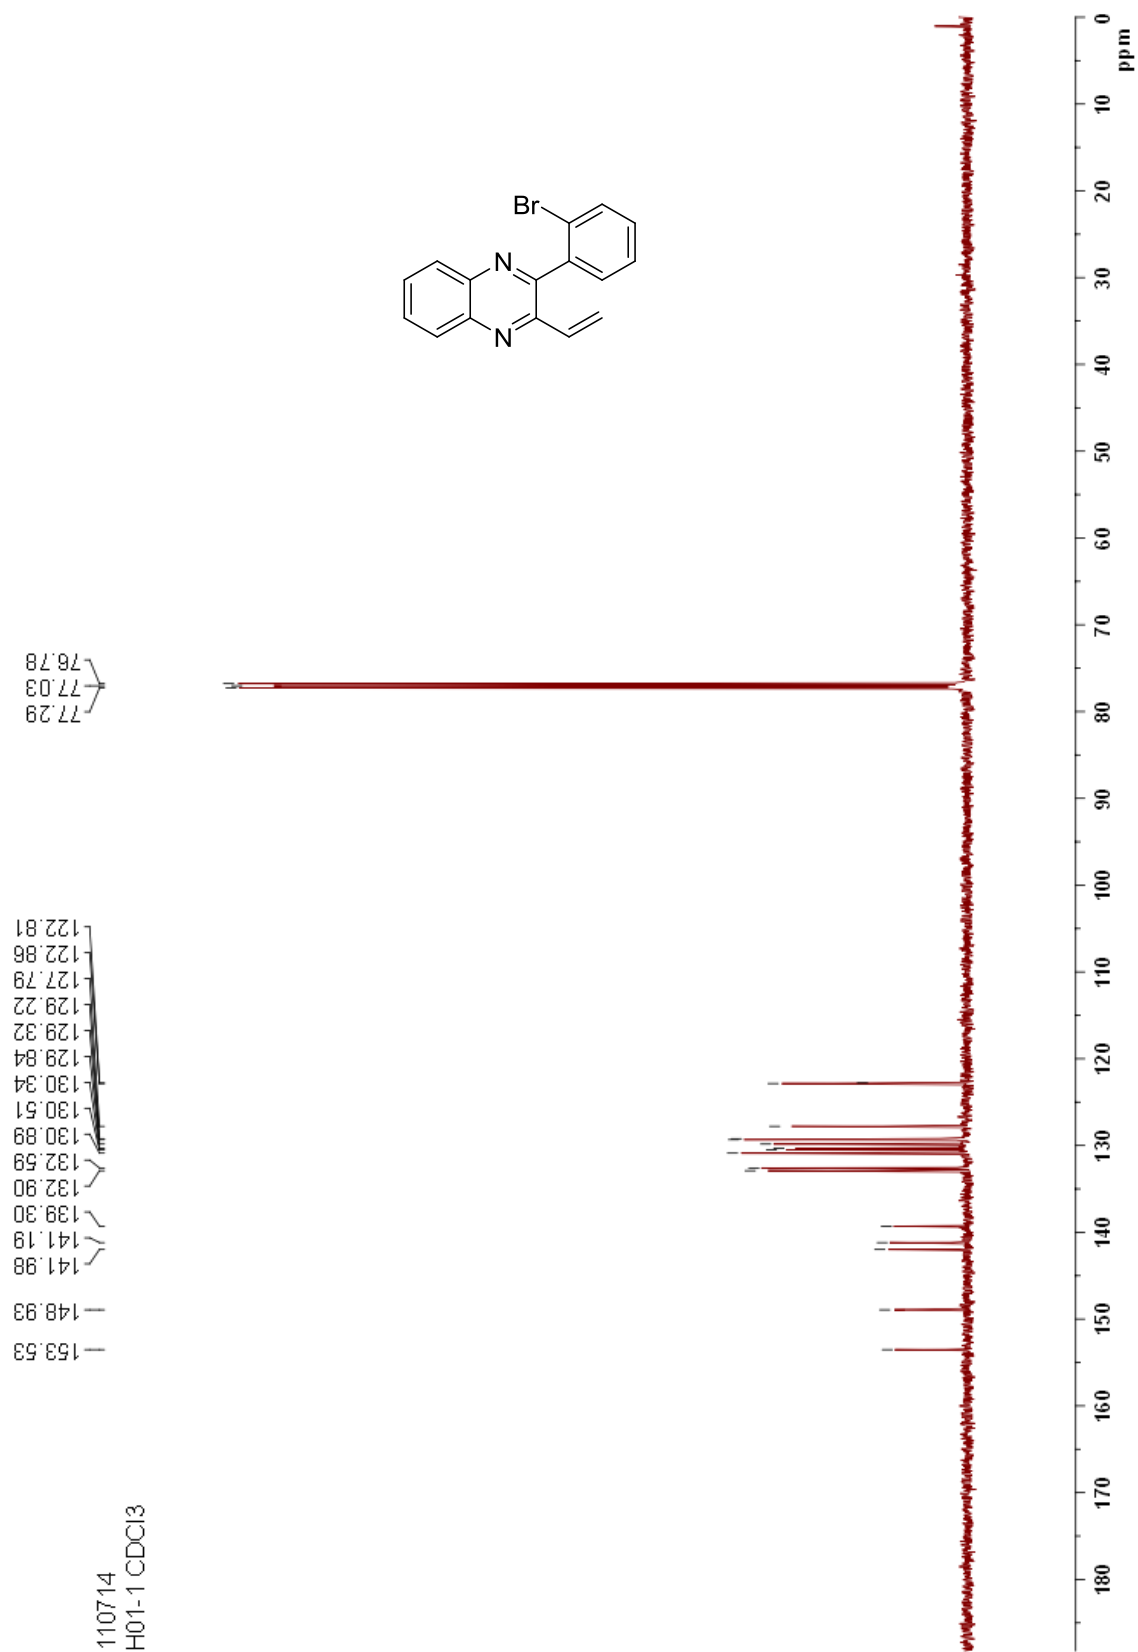

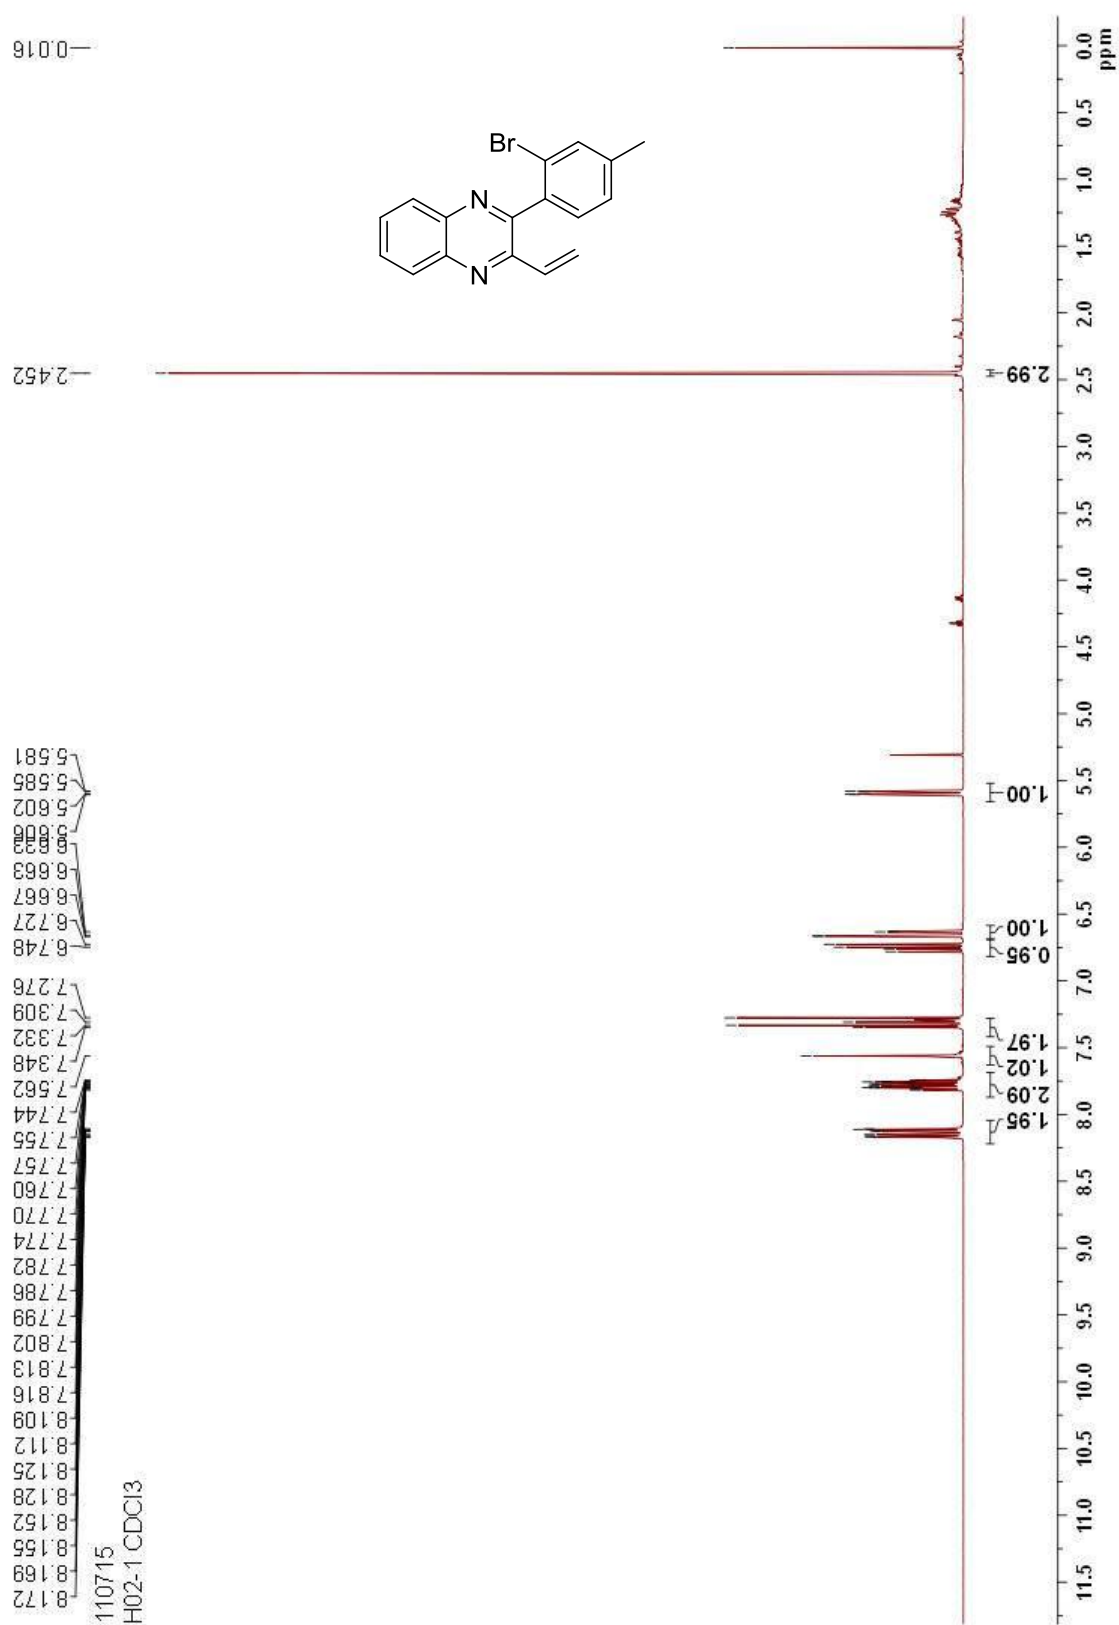

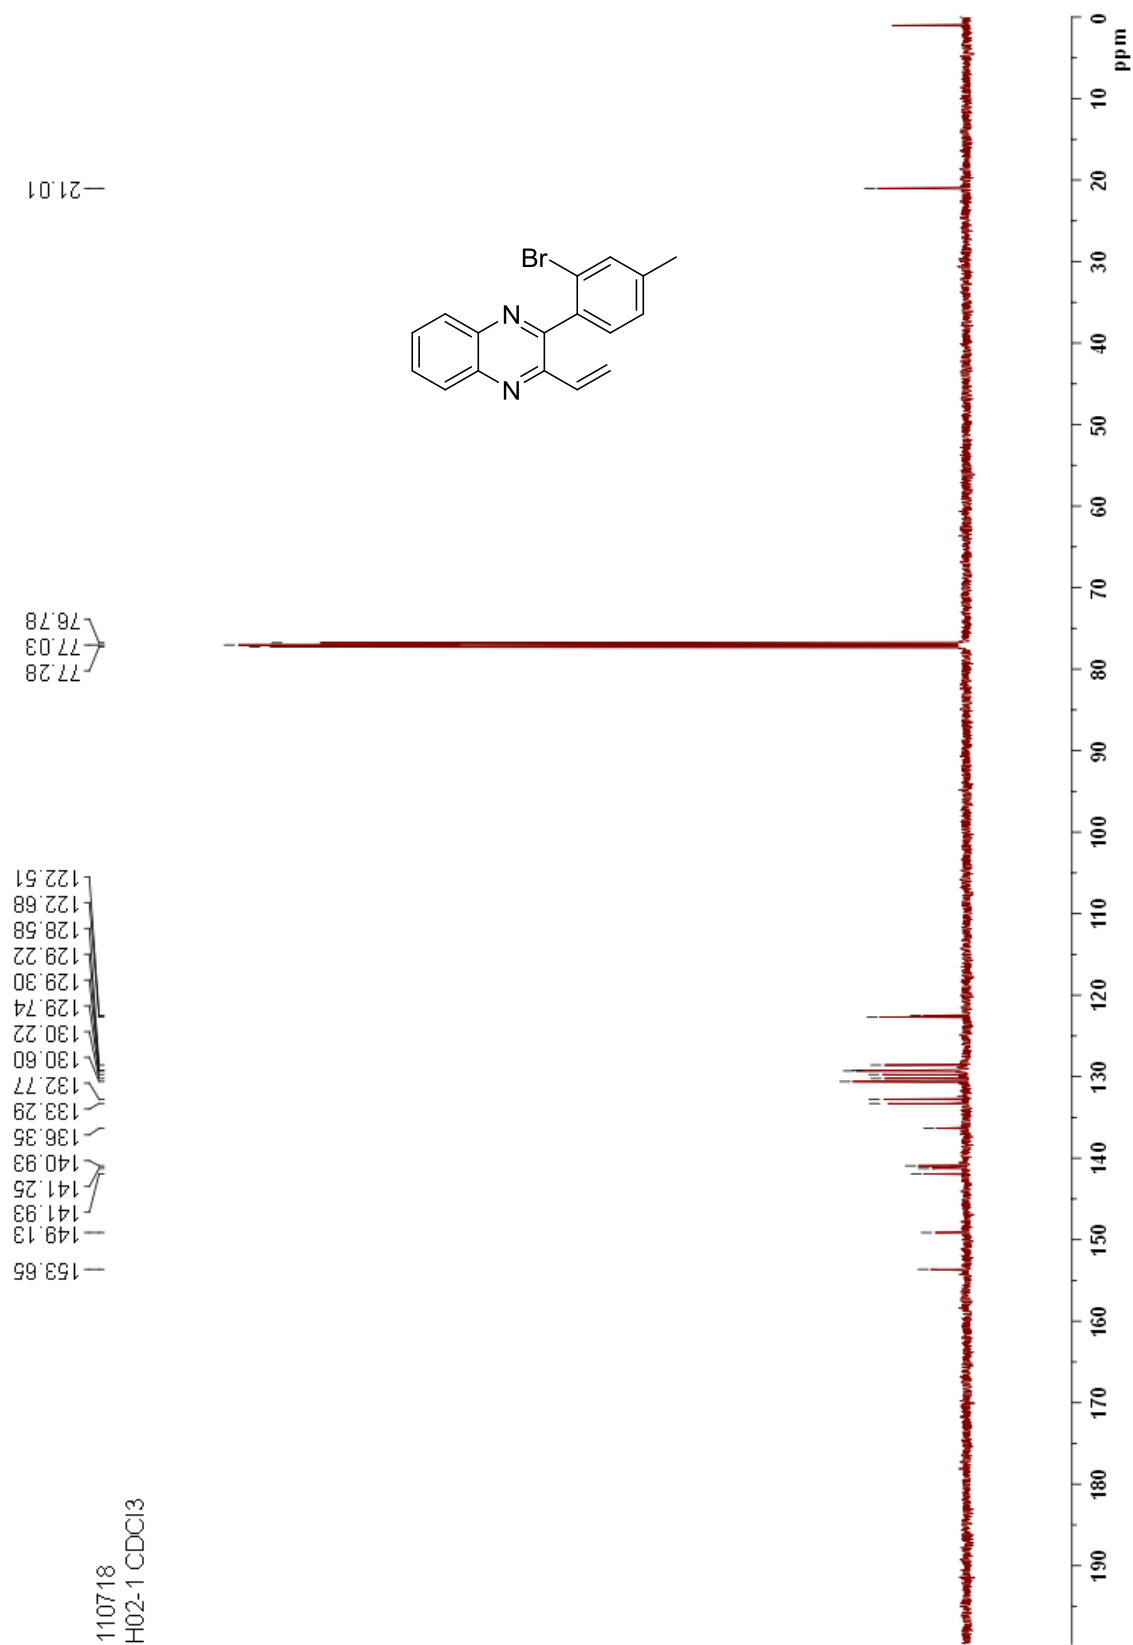

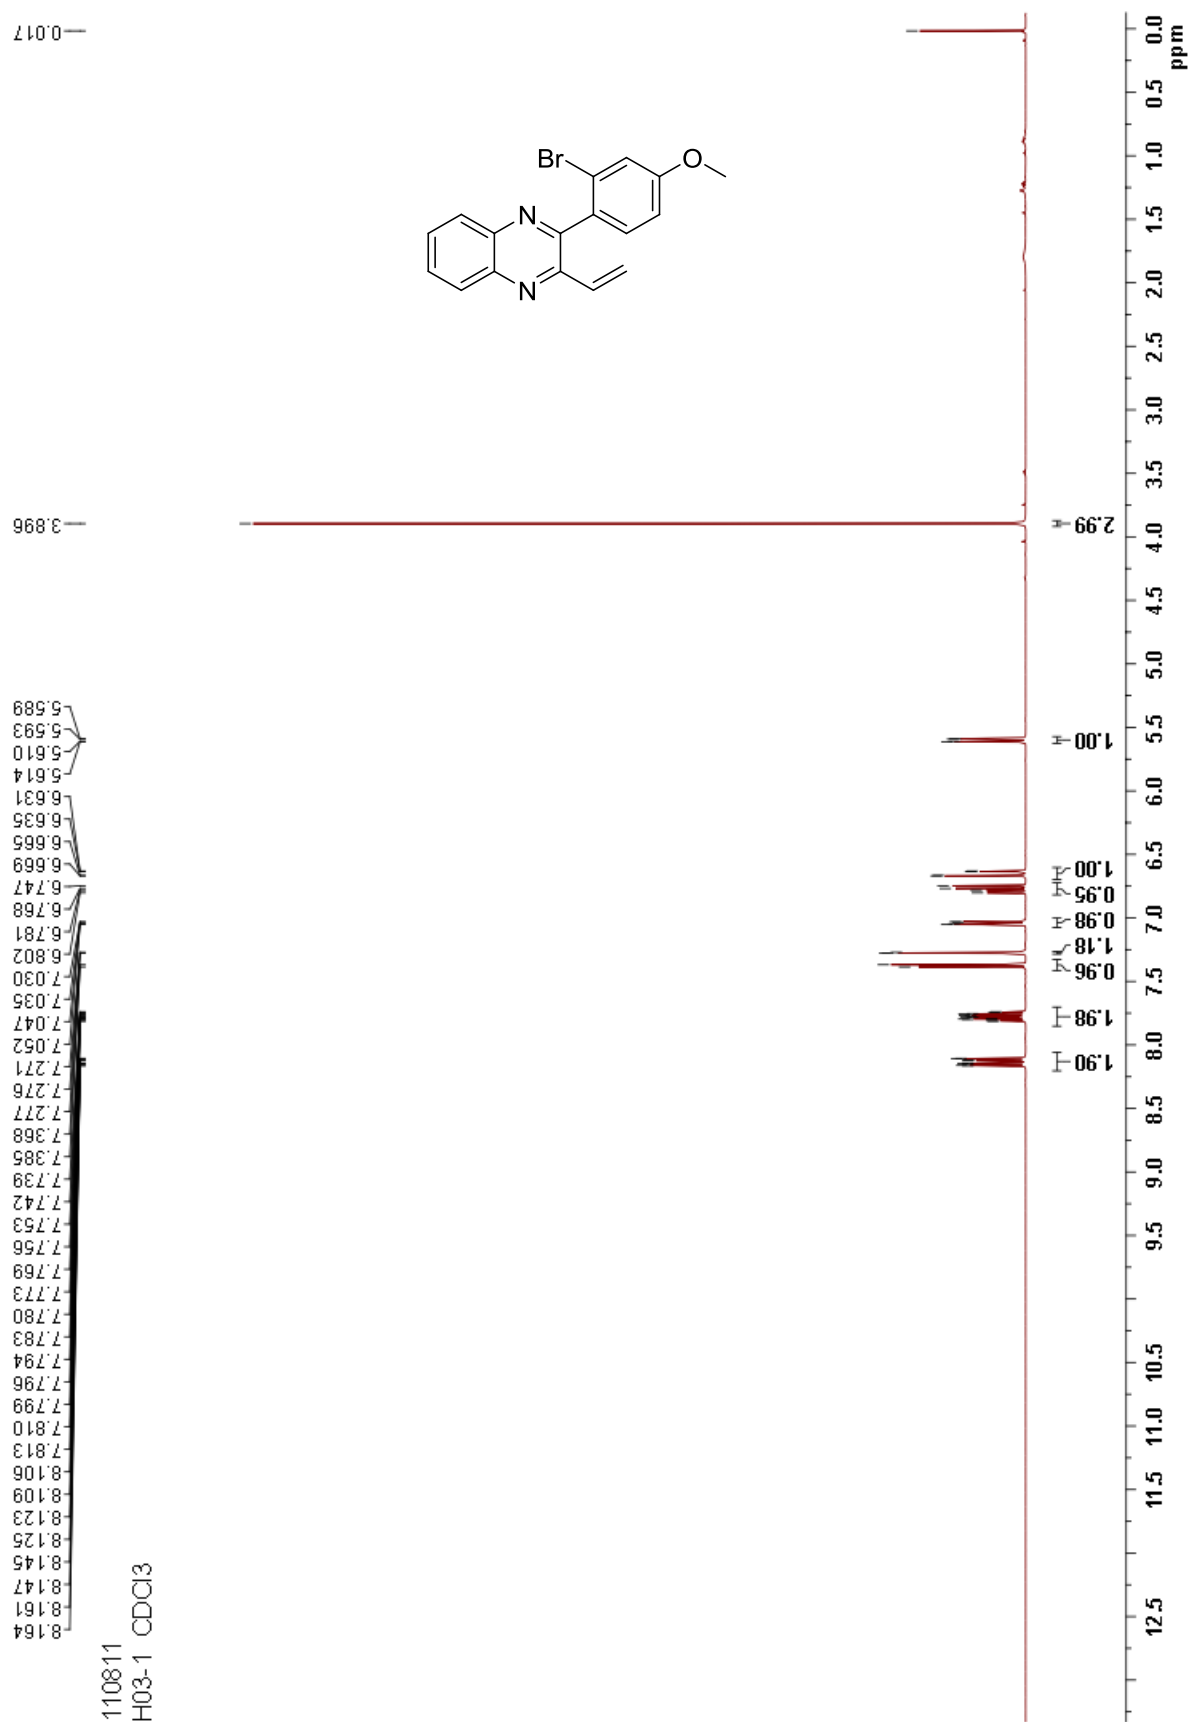



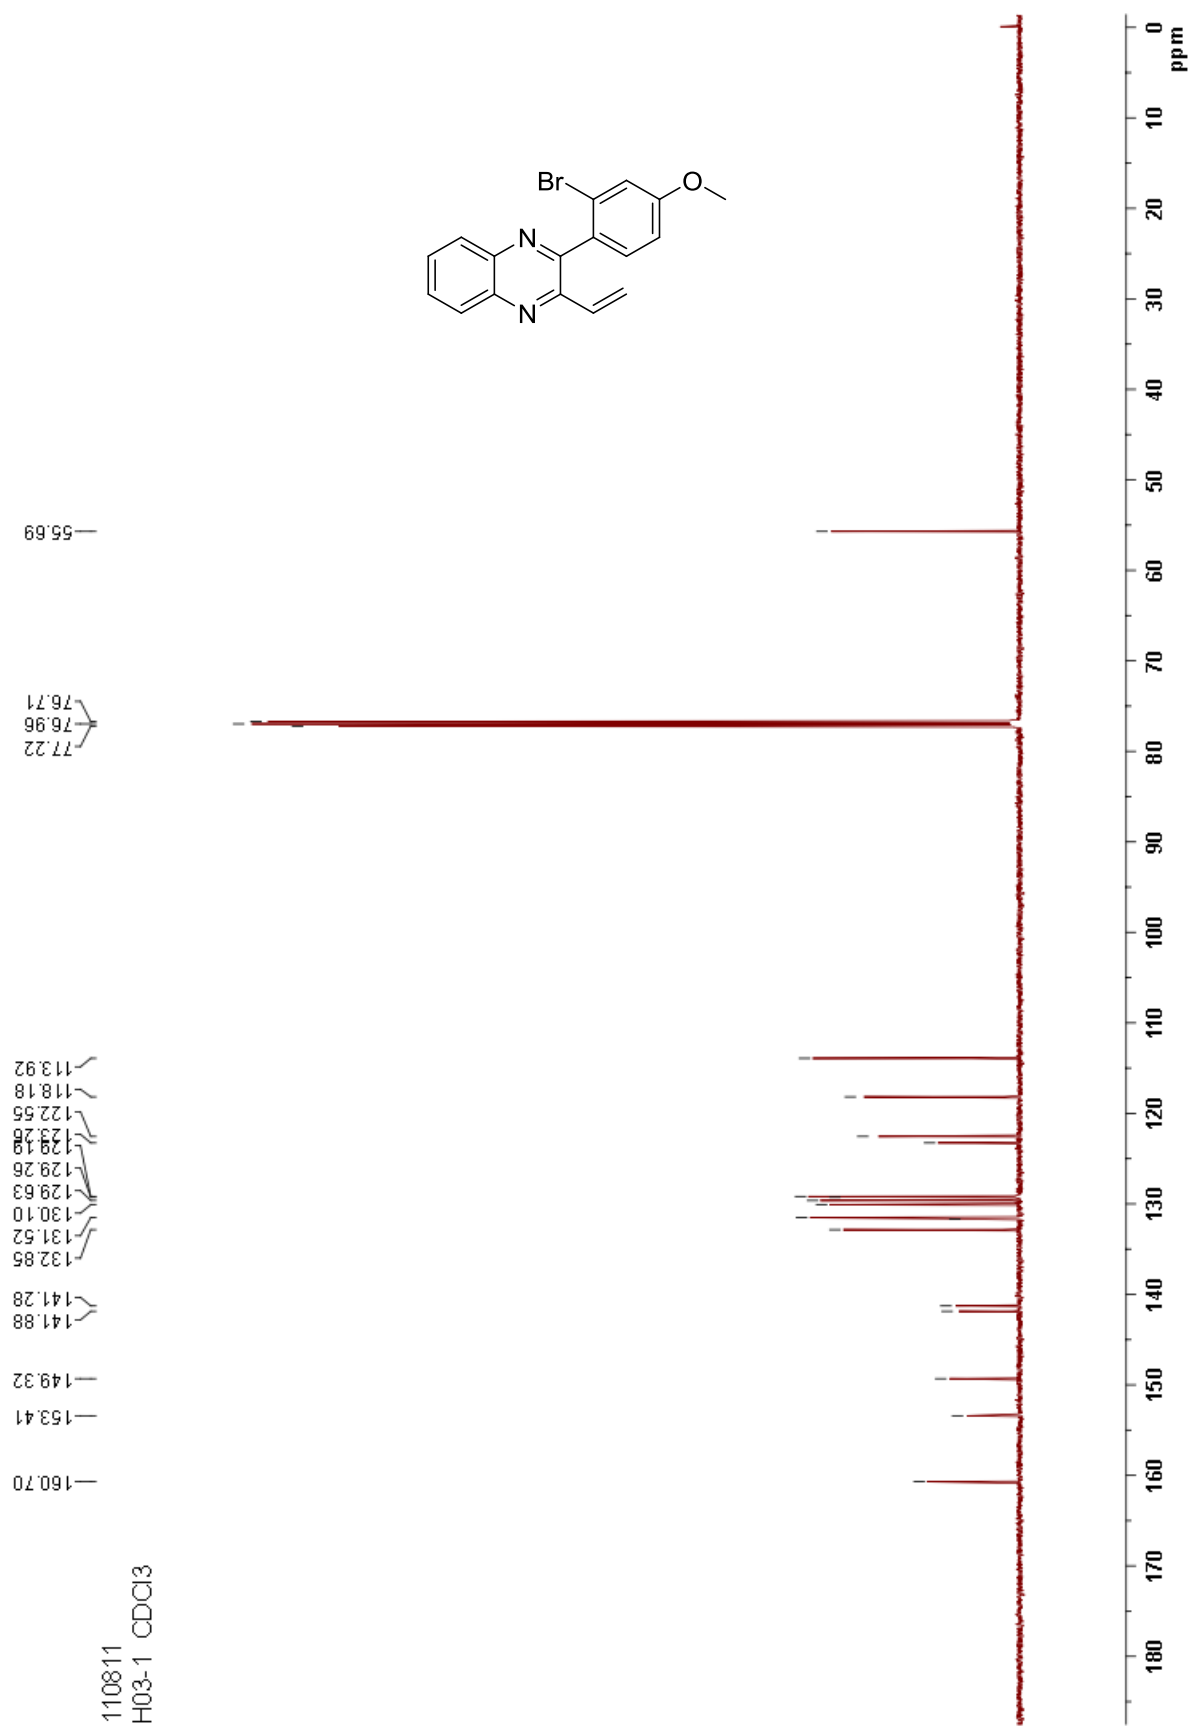

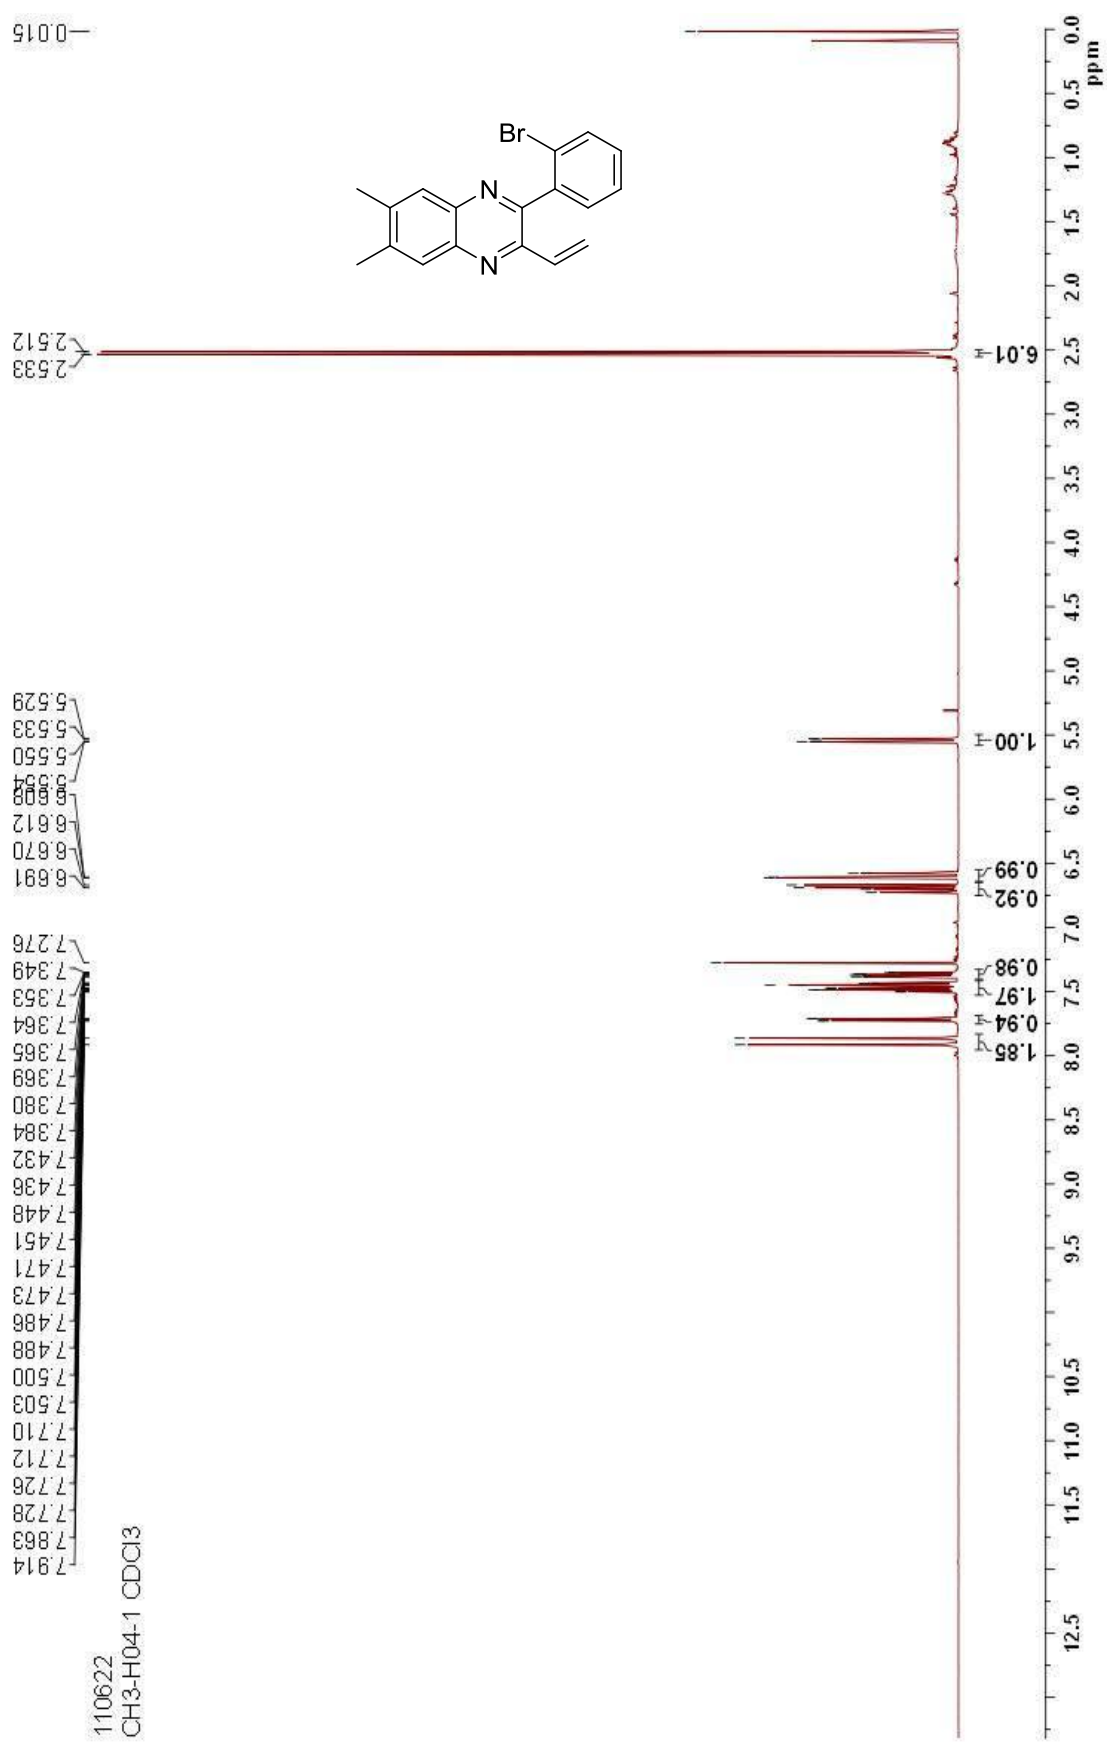

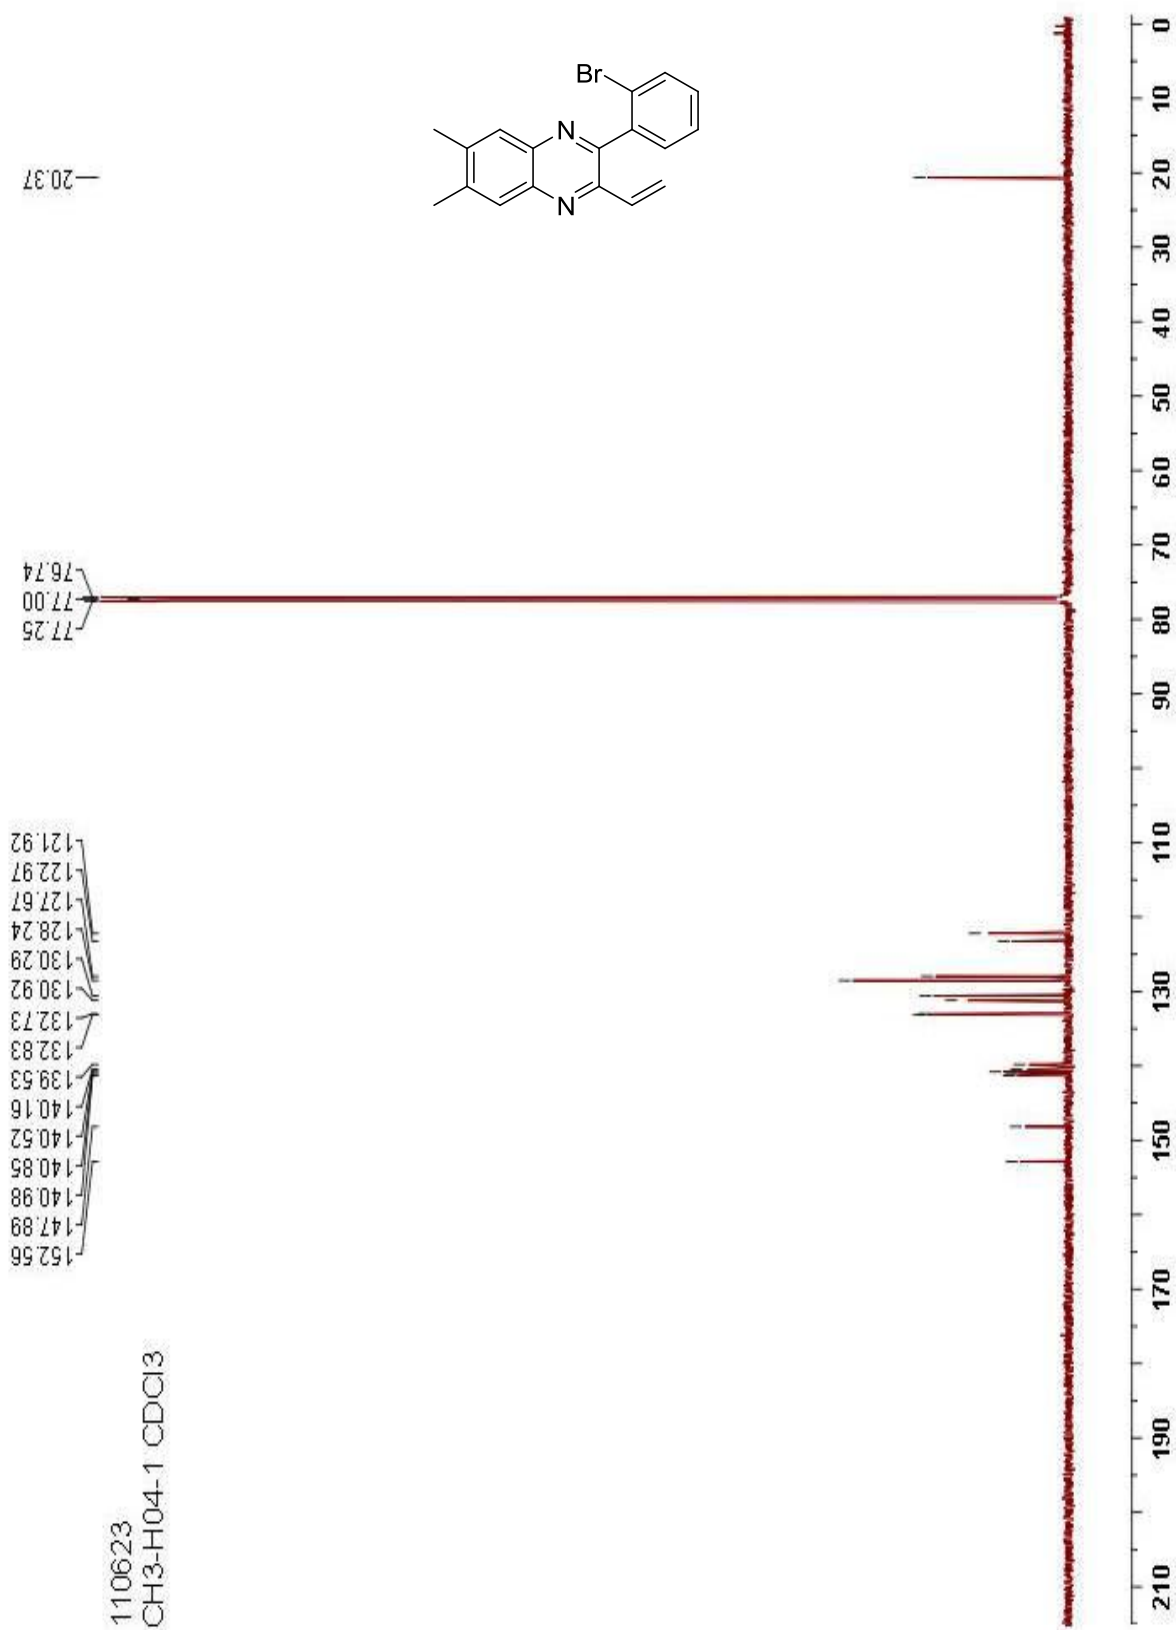

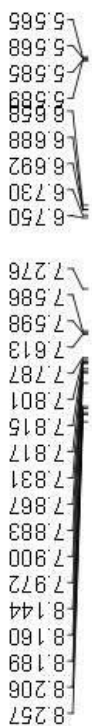

110713  
H05-1 CDCI3

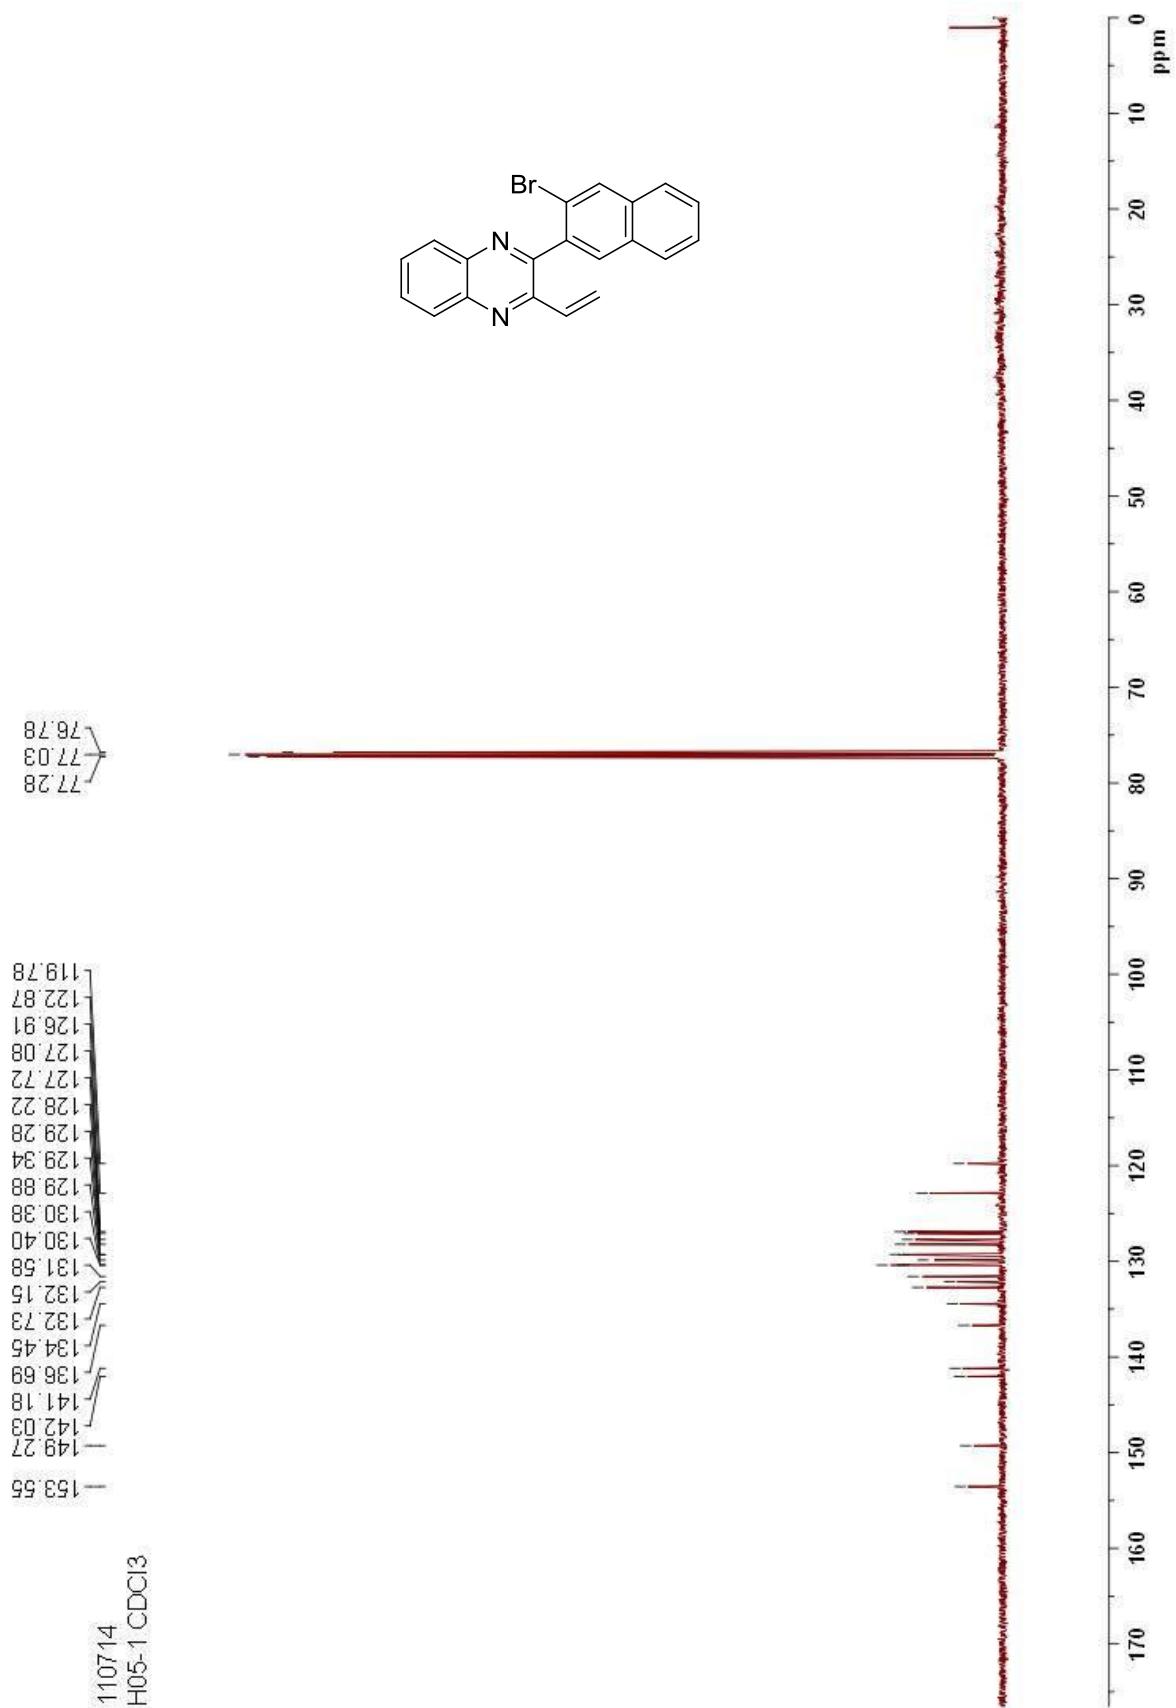

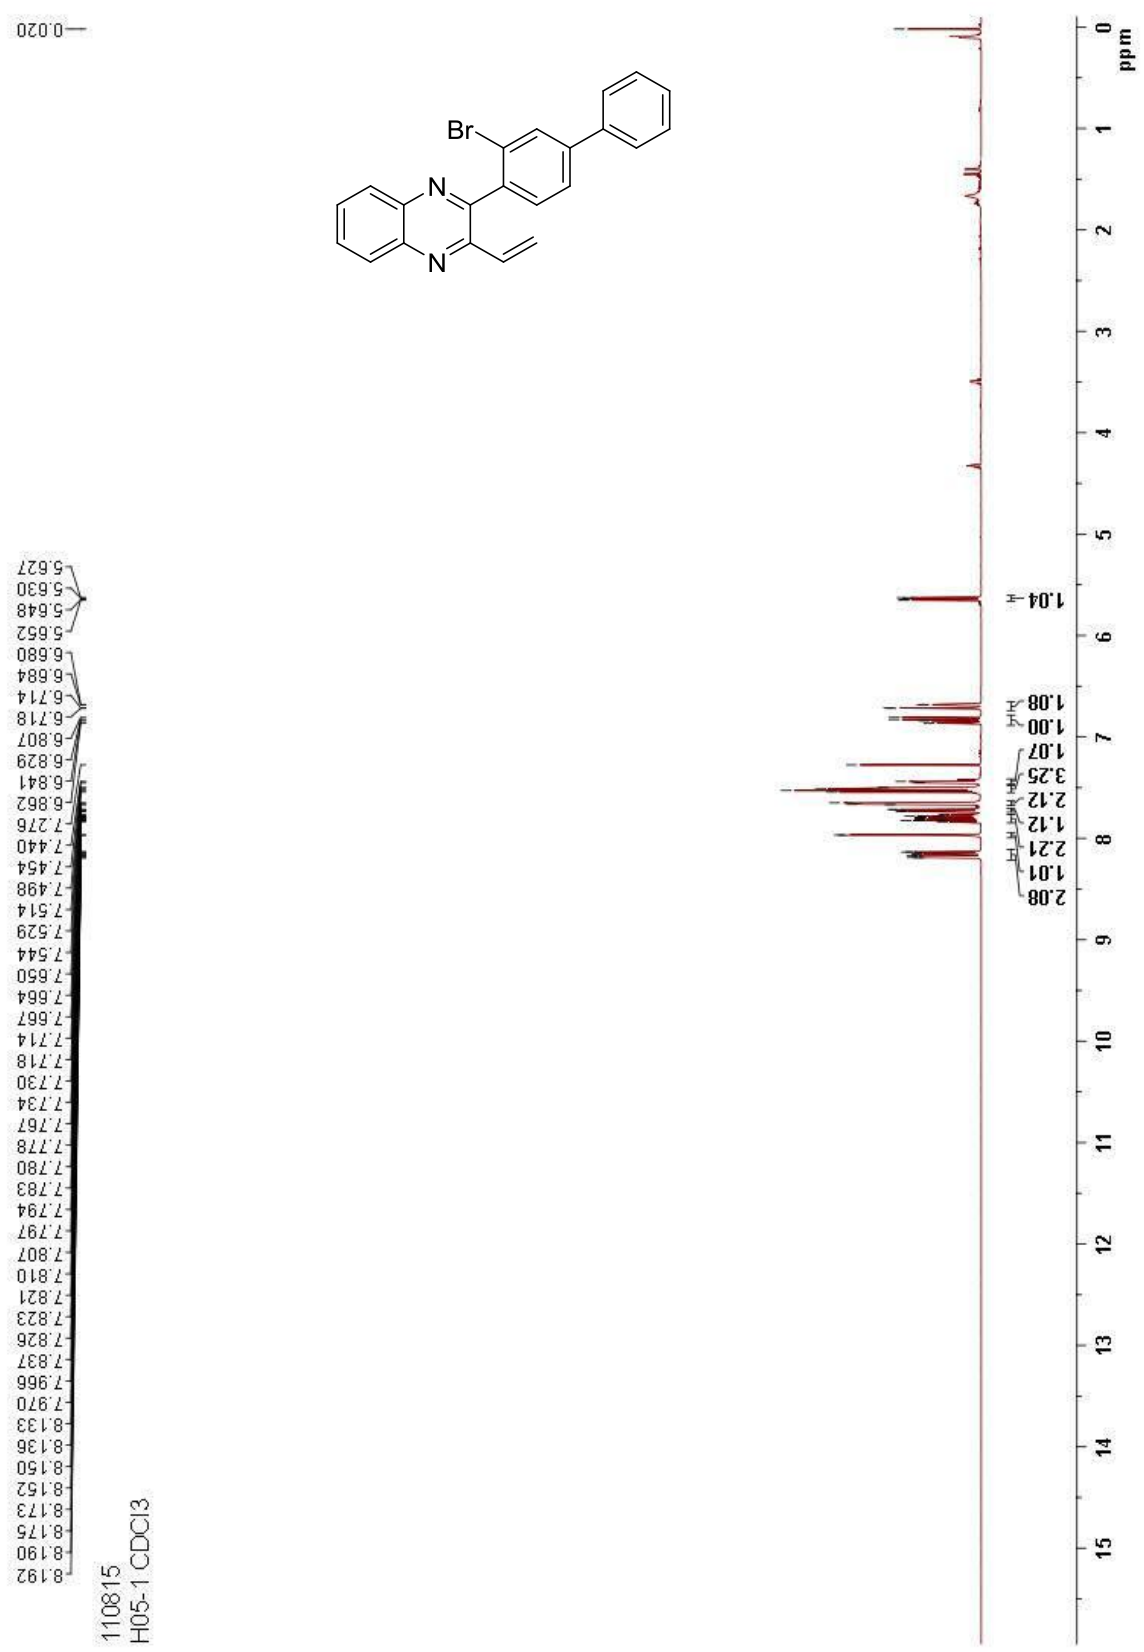

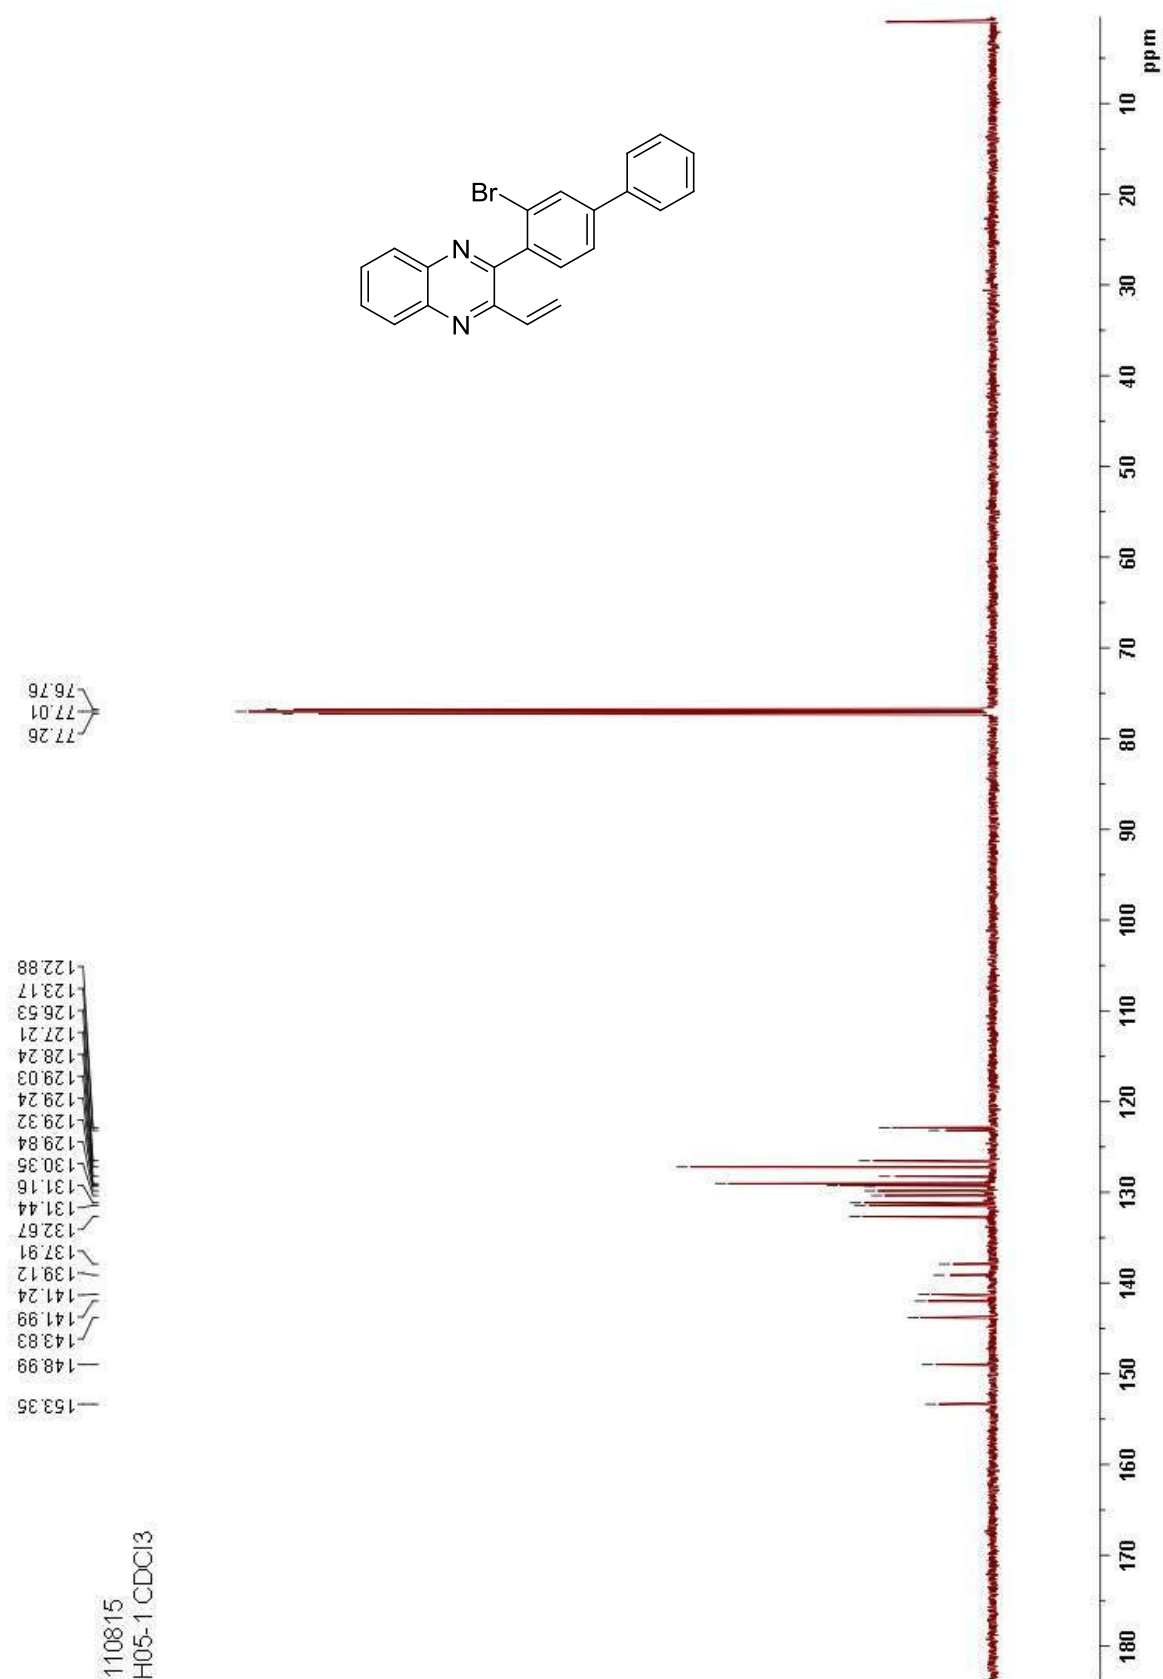

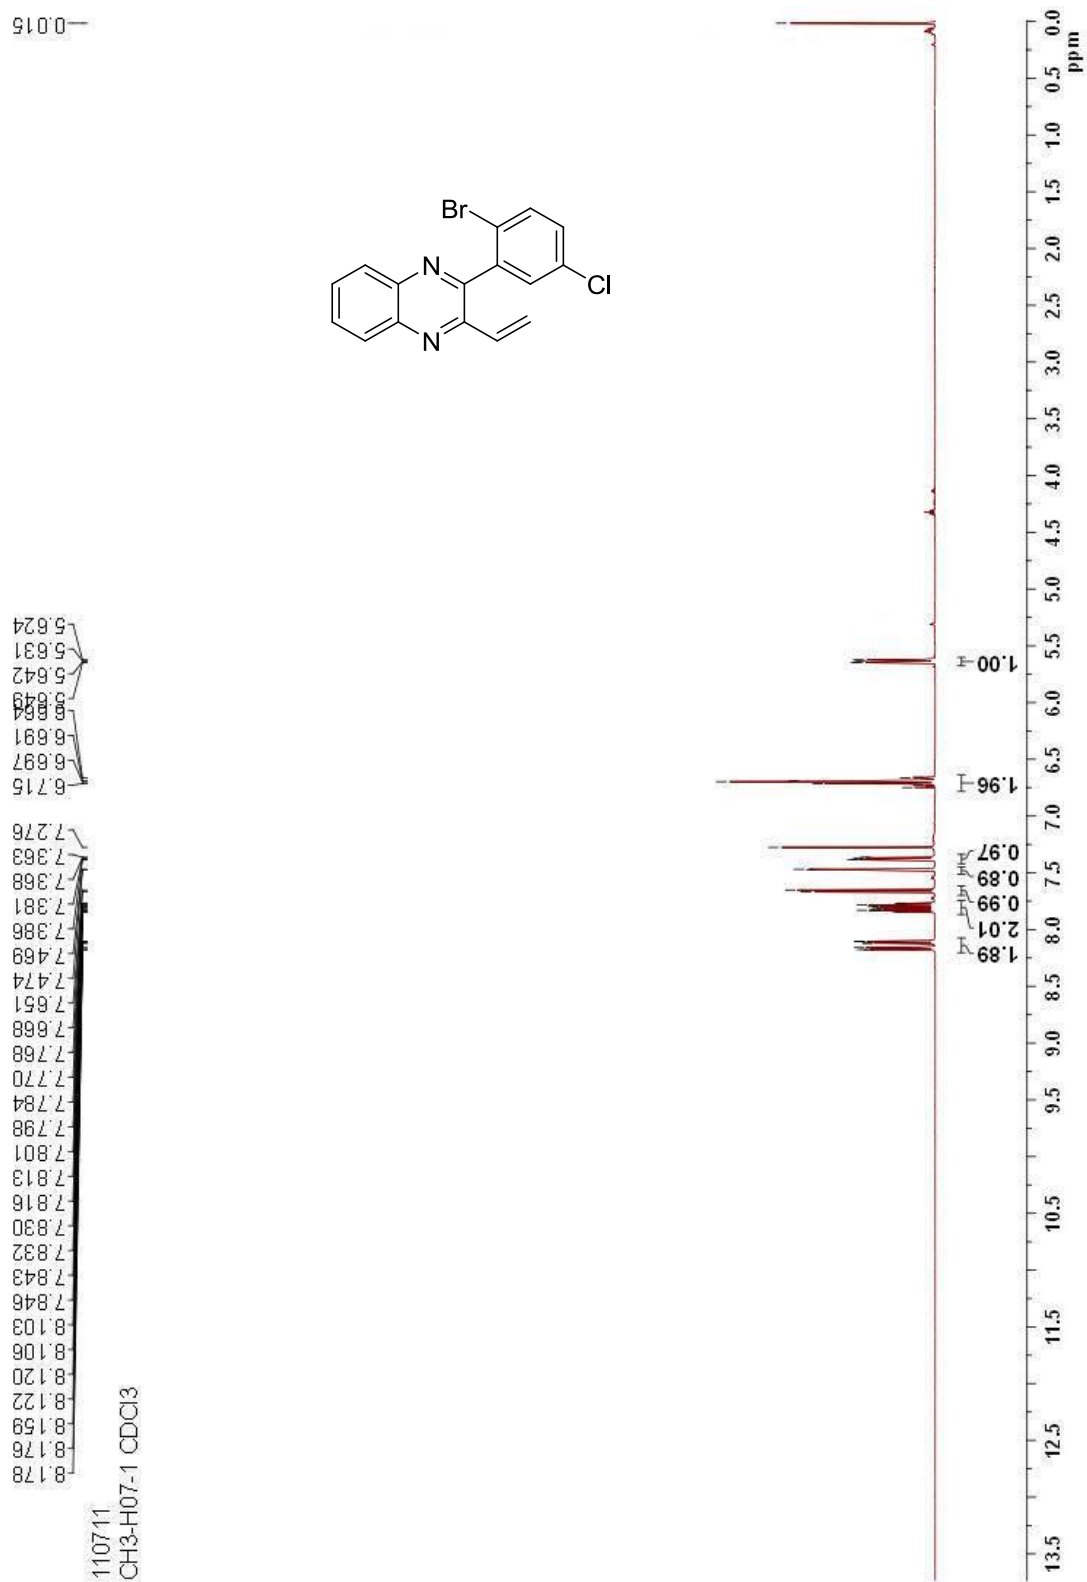



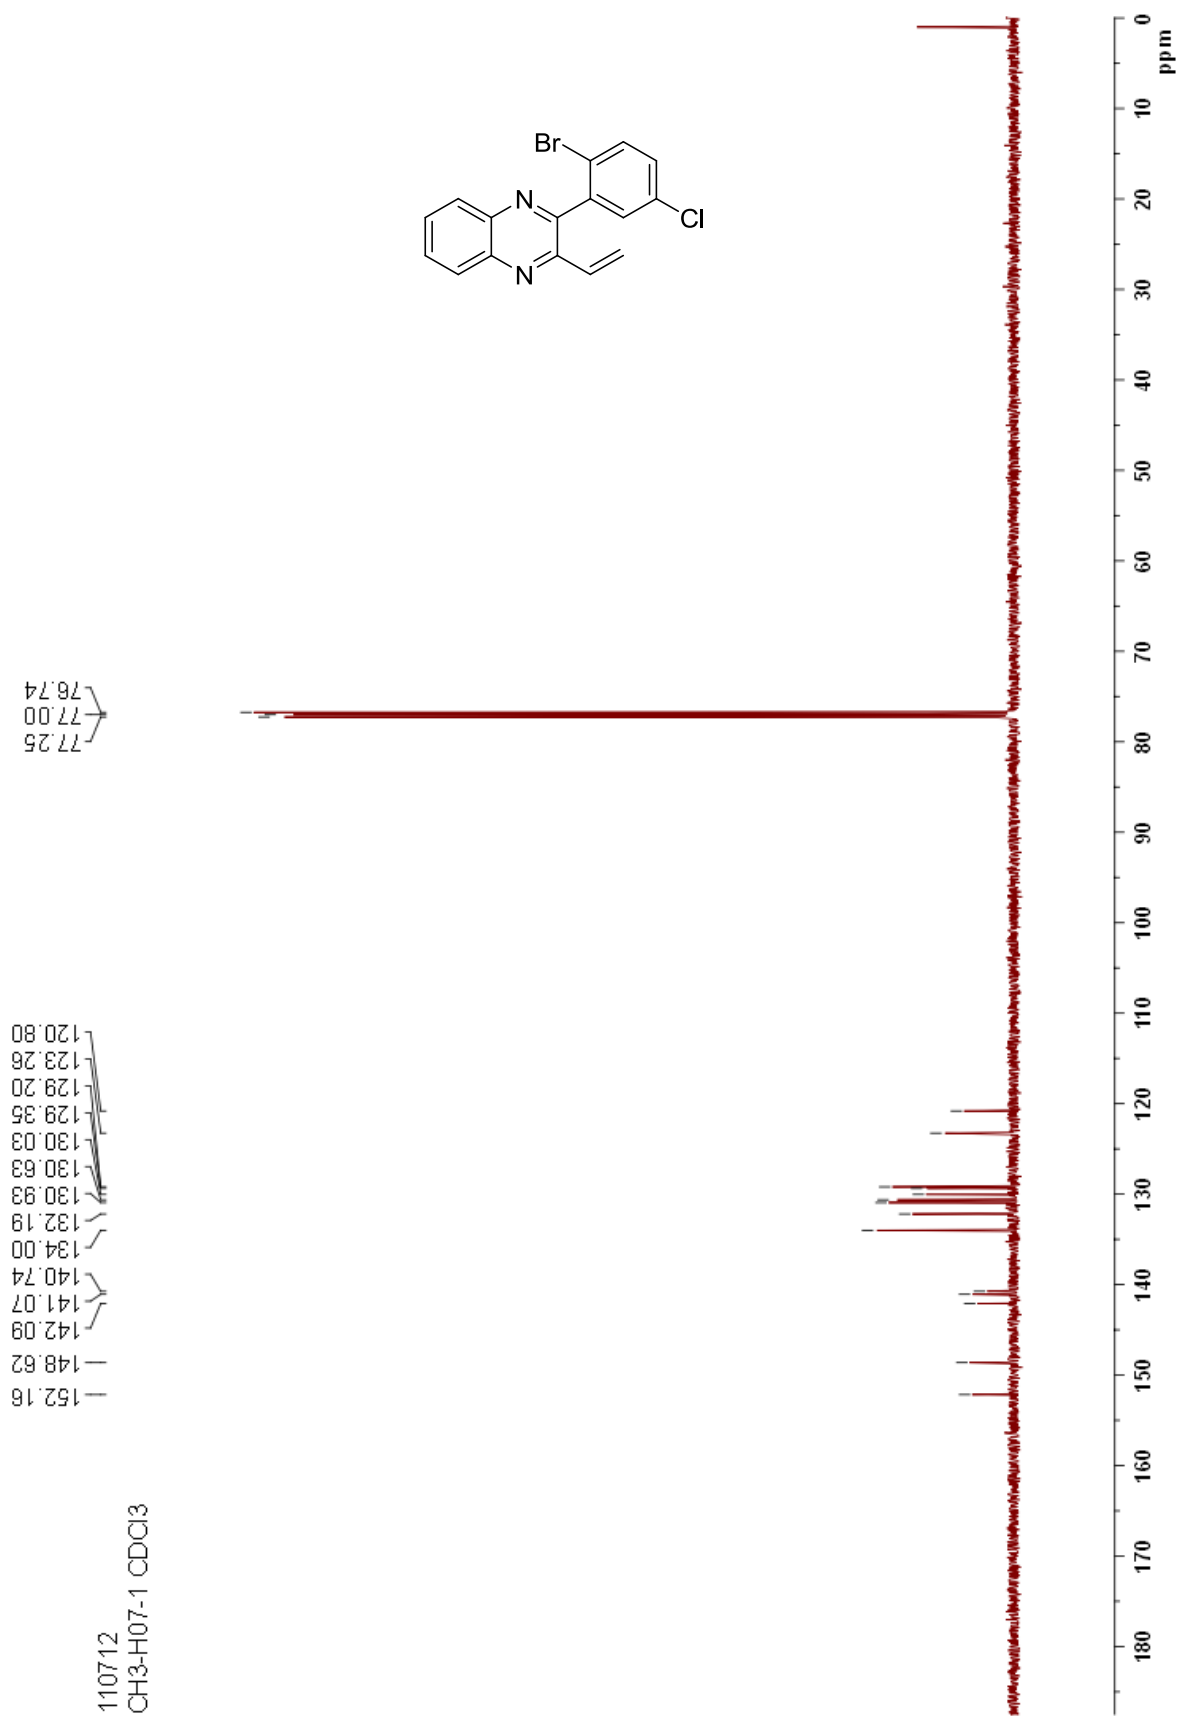

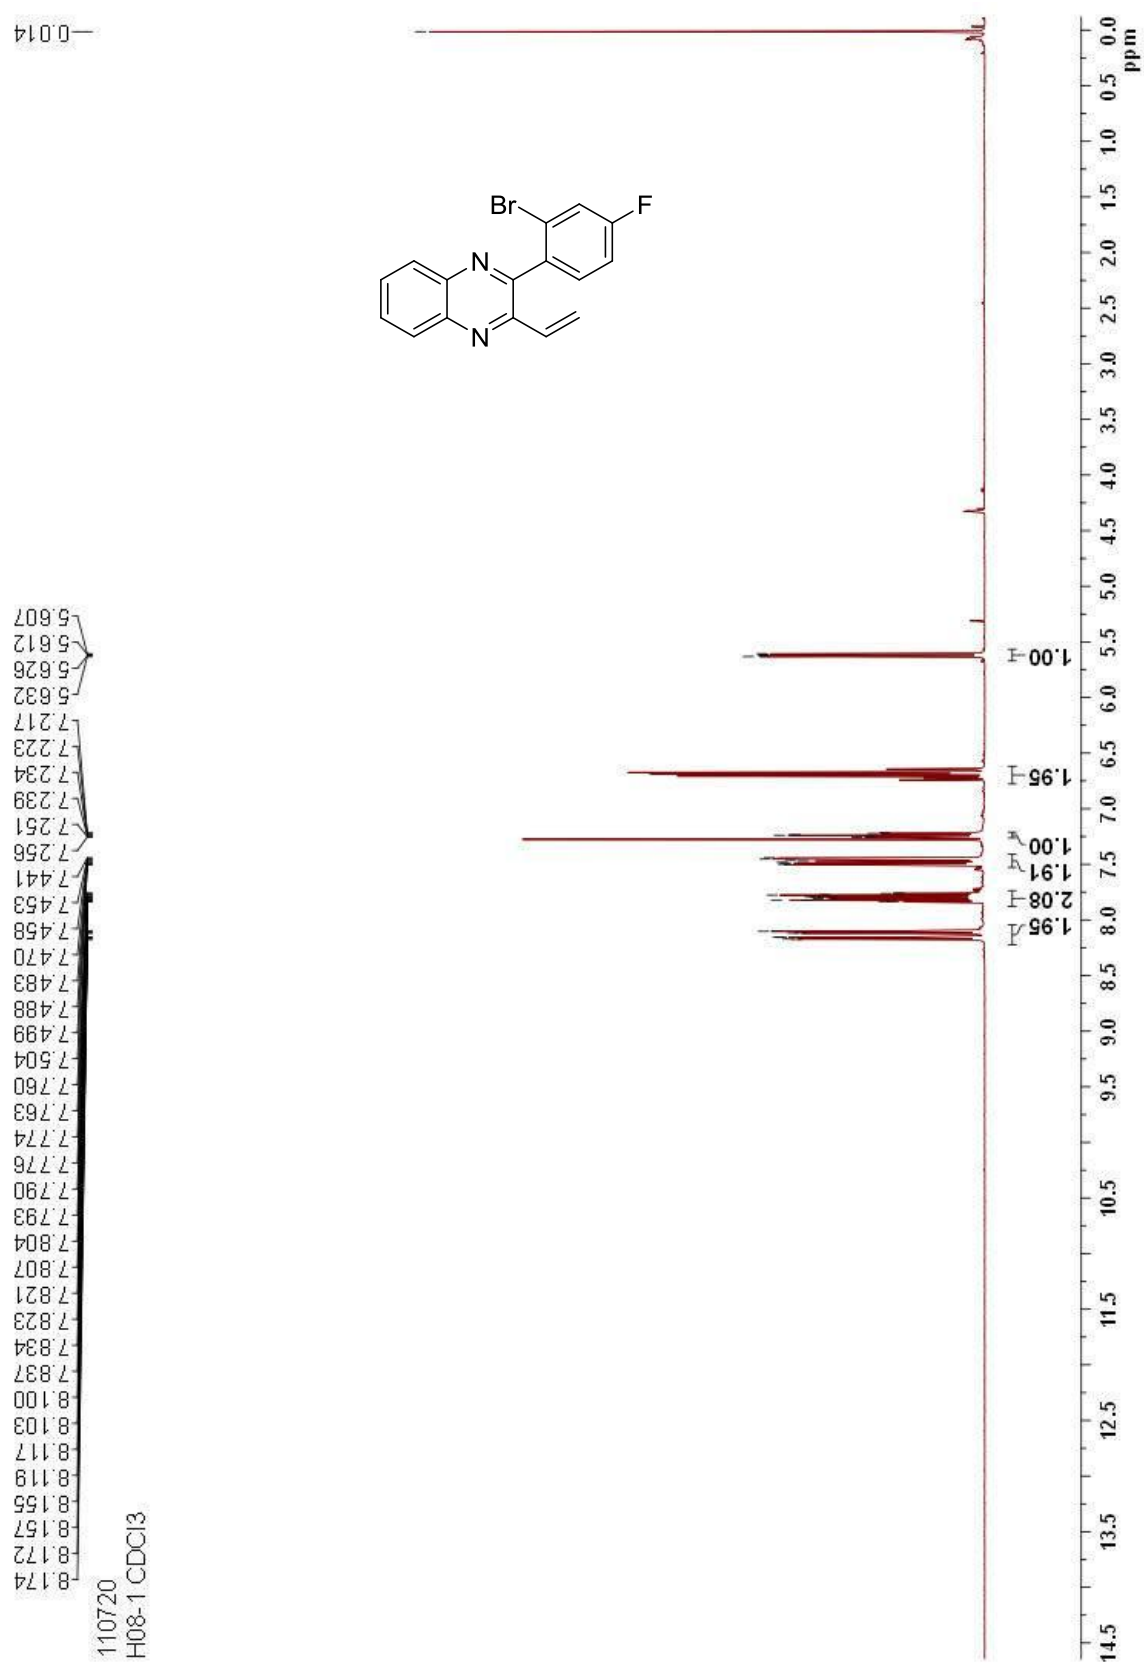

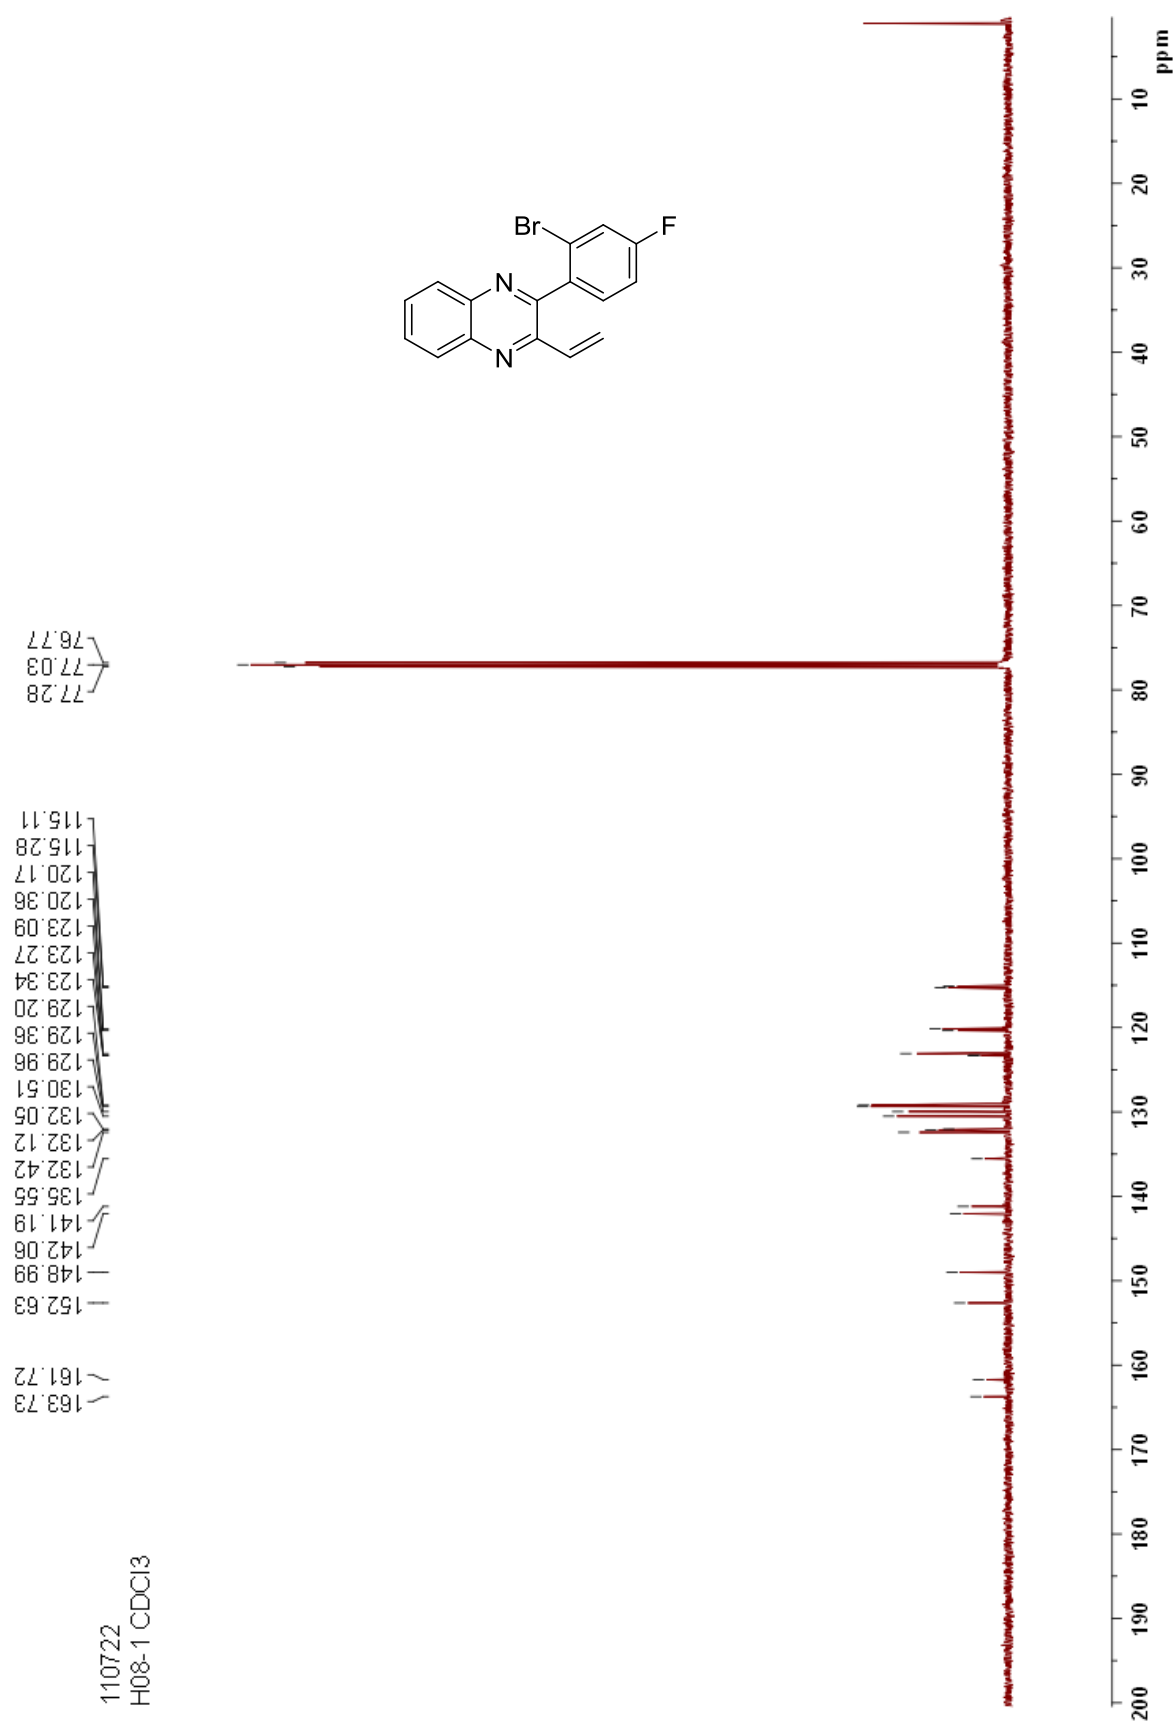

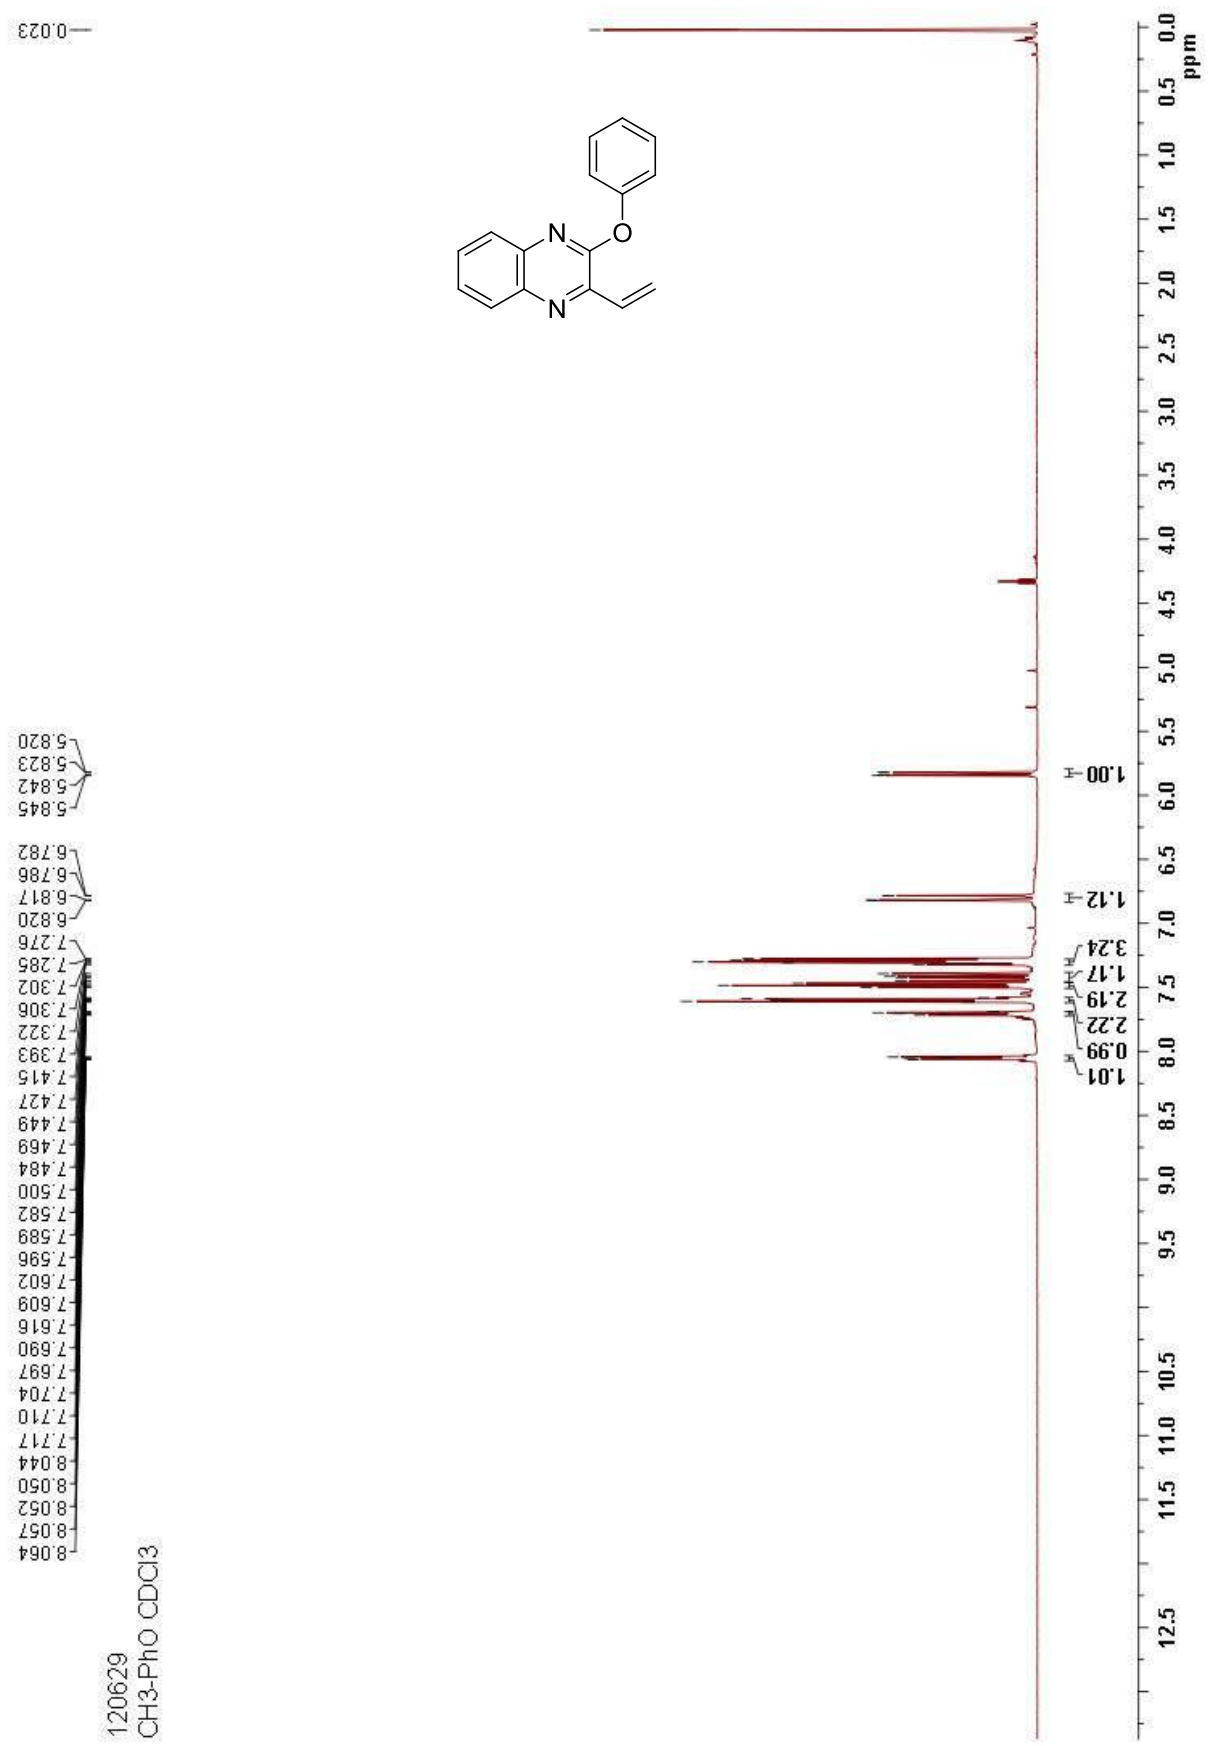

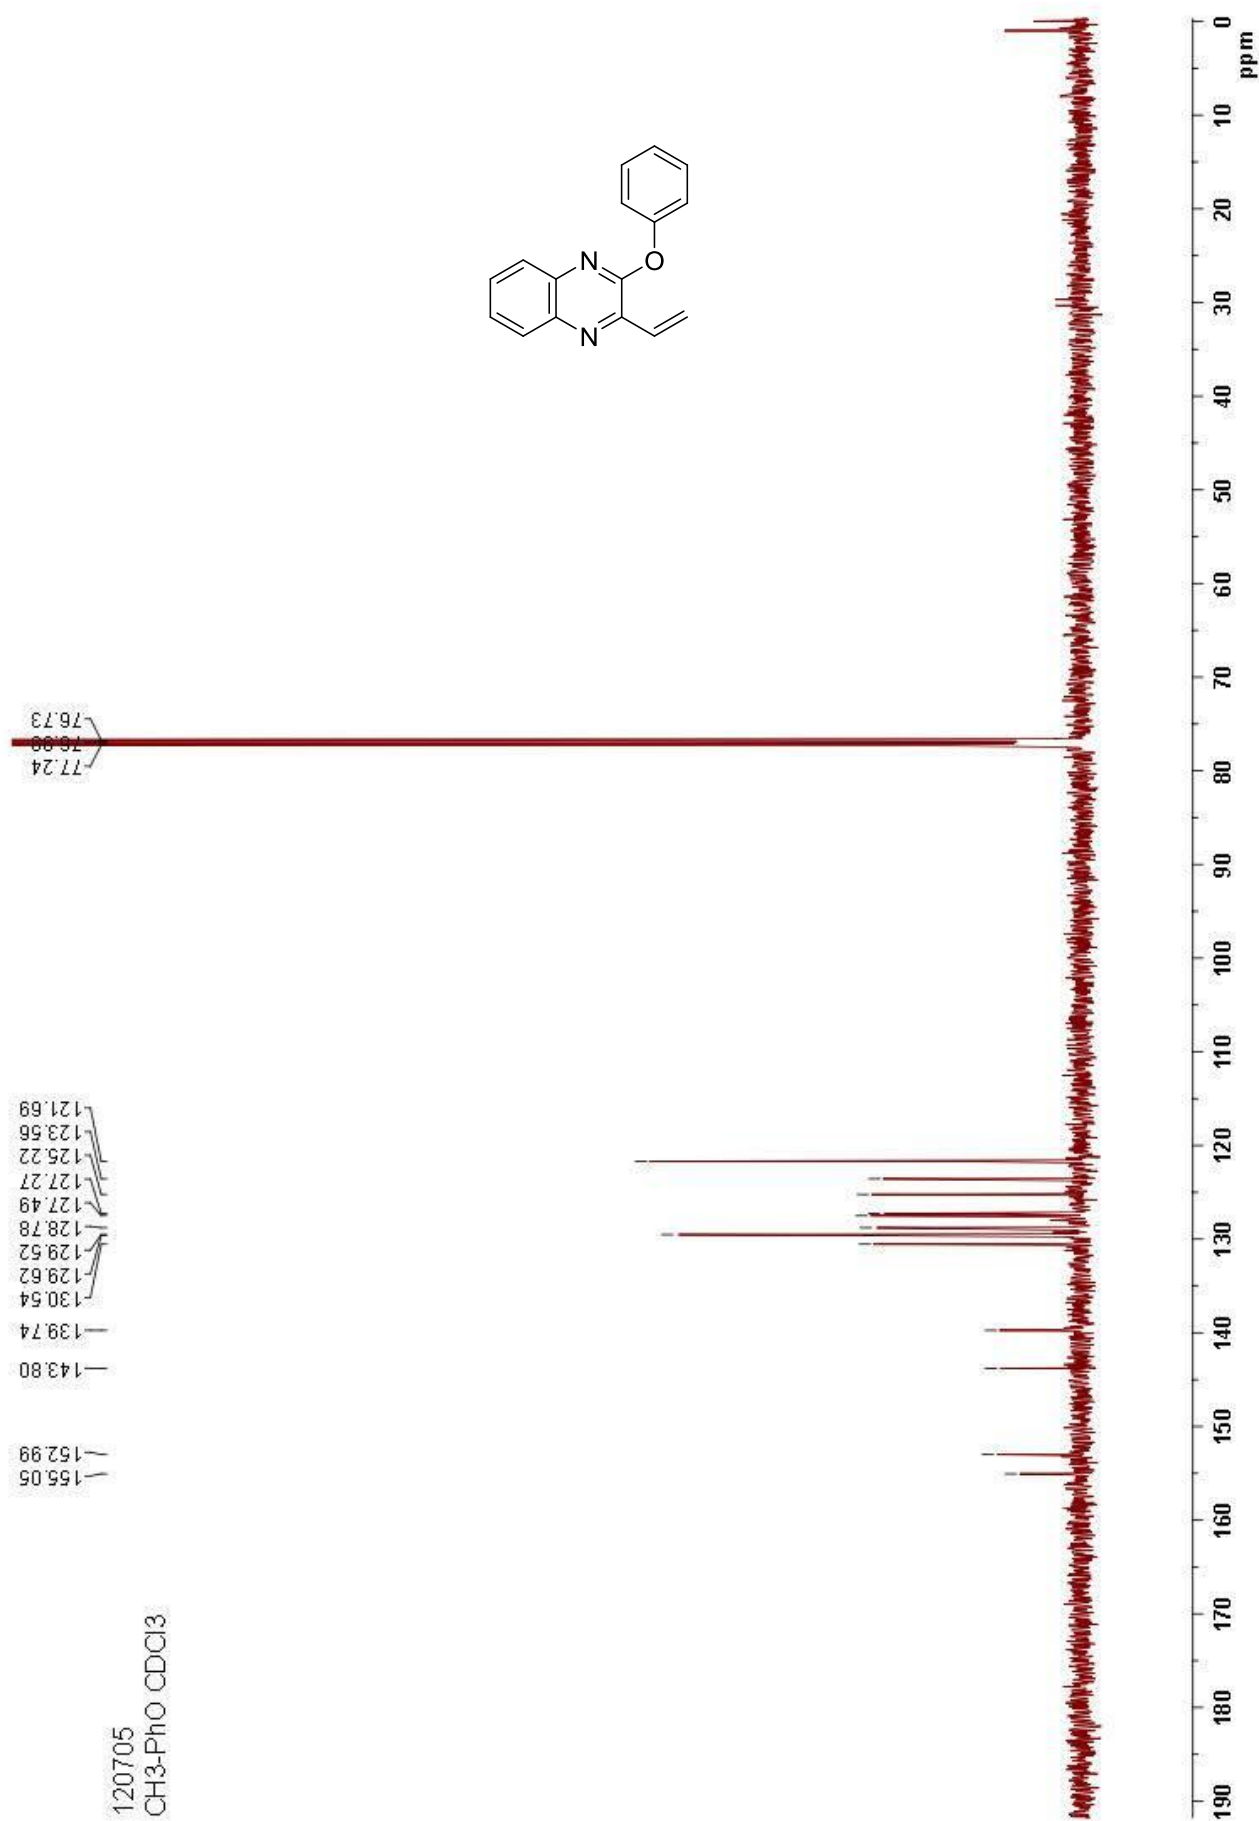

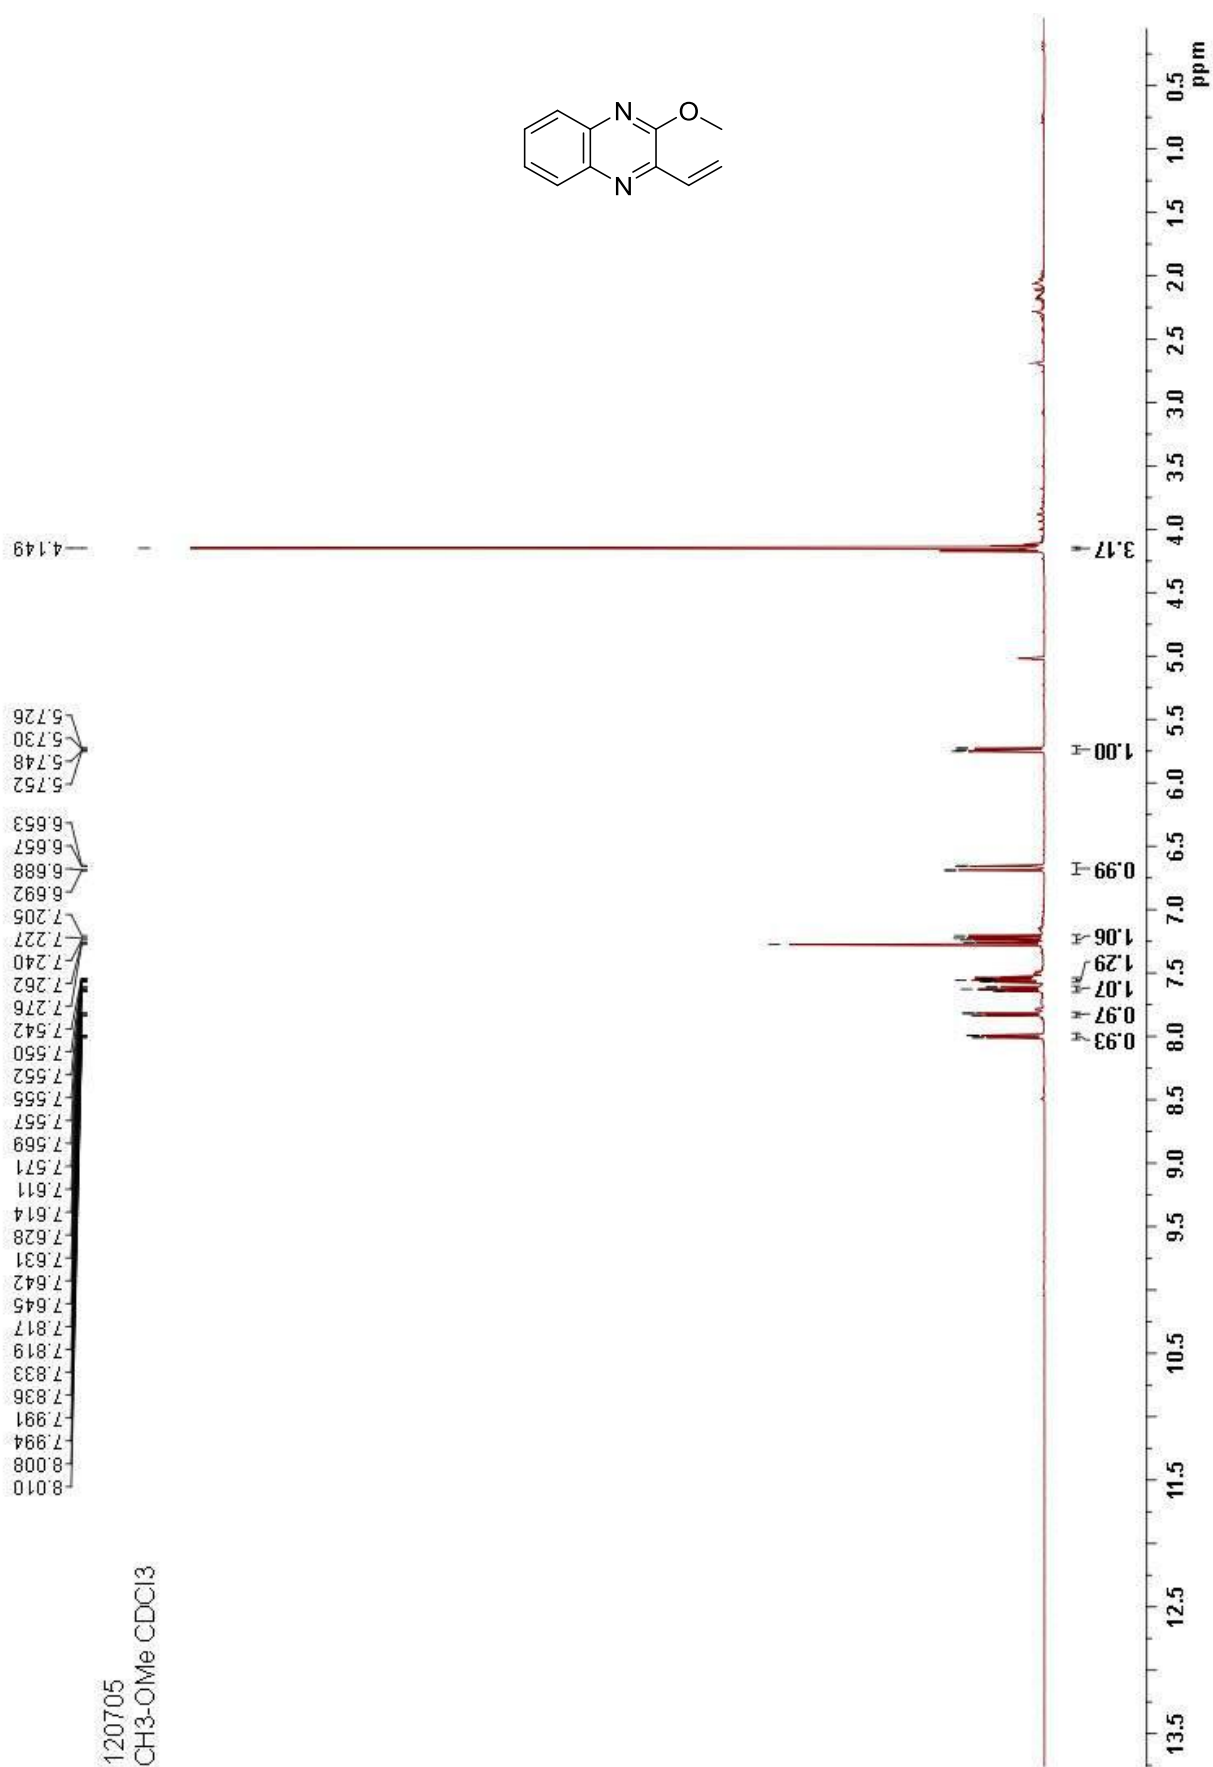

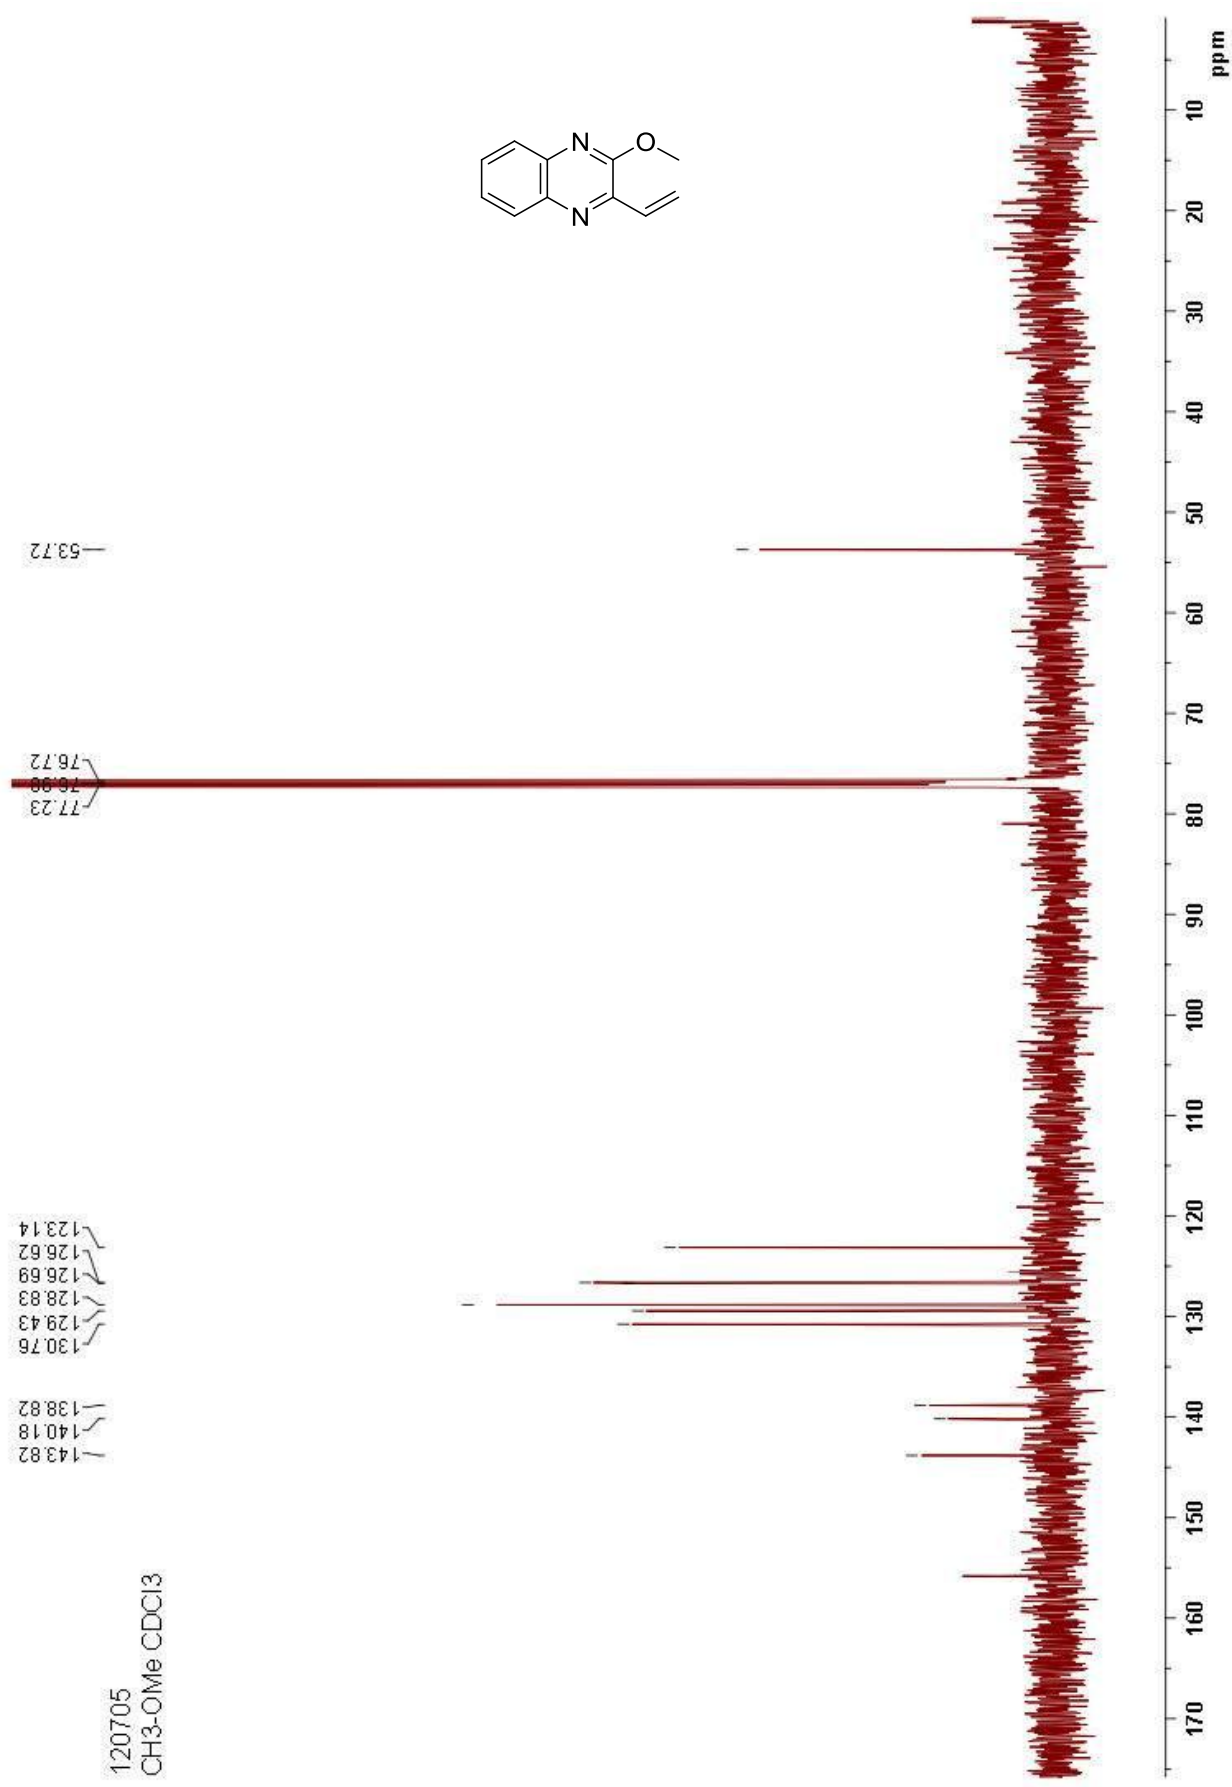

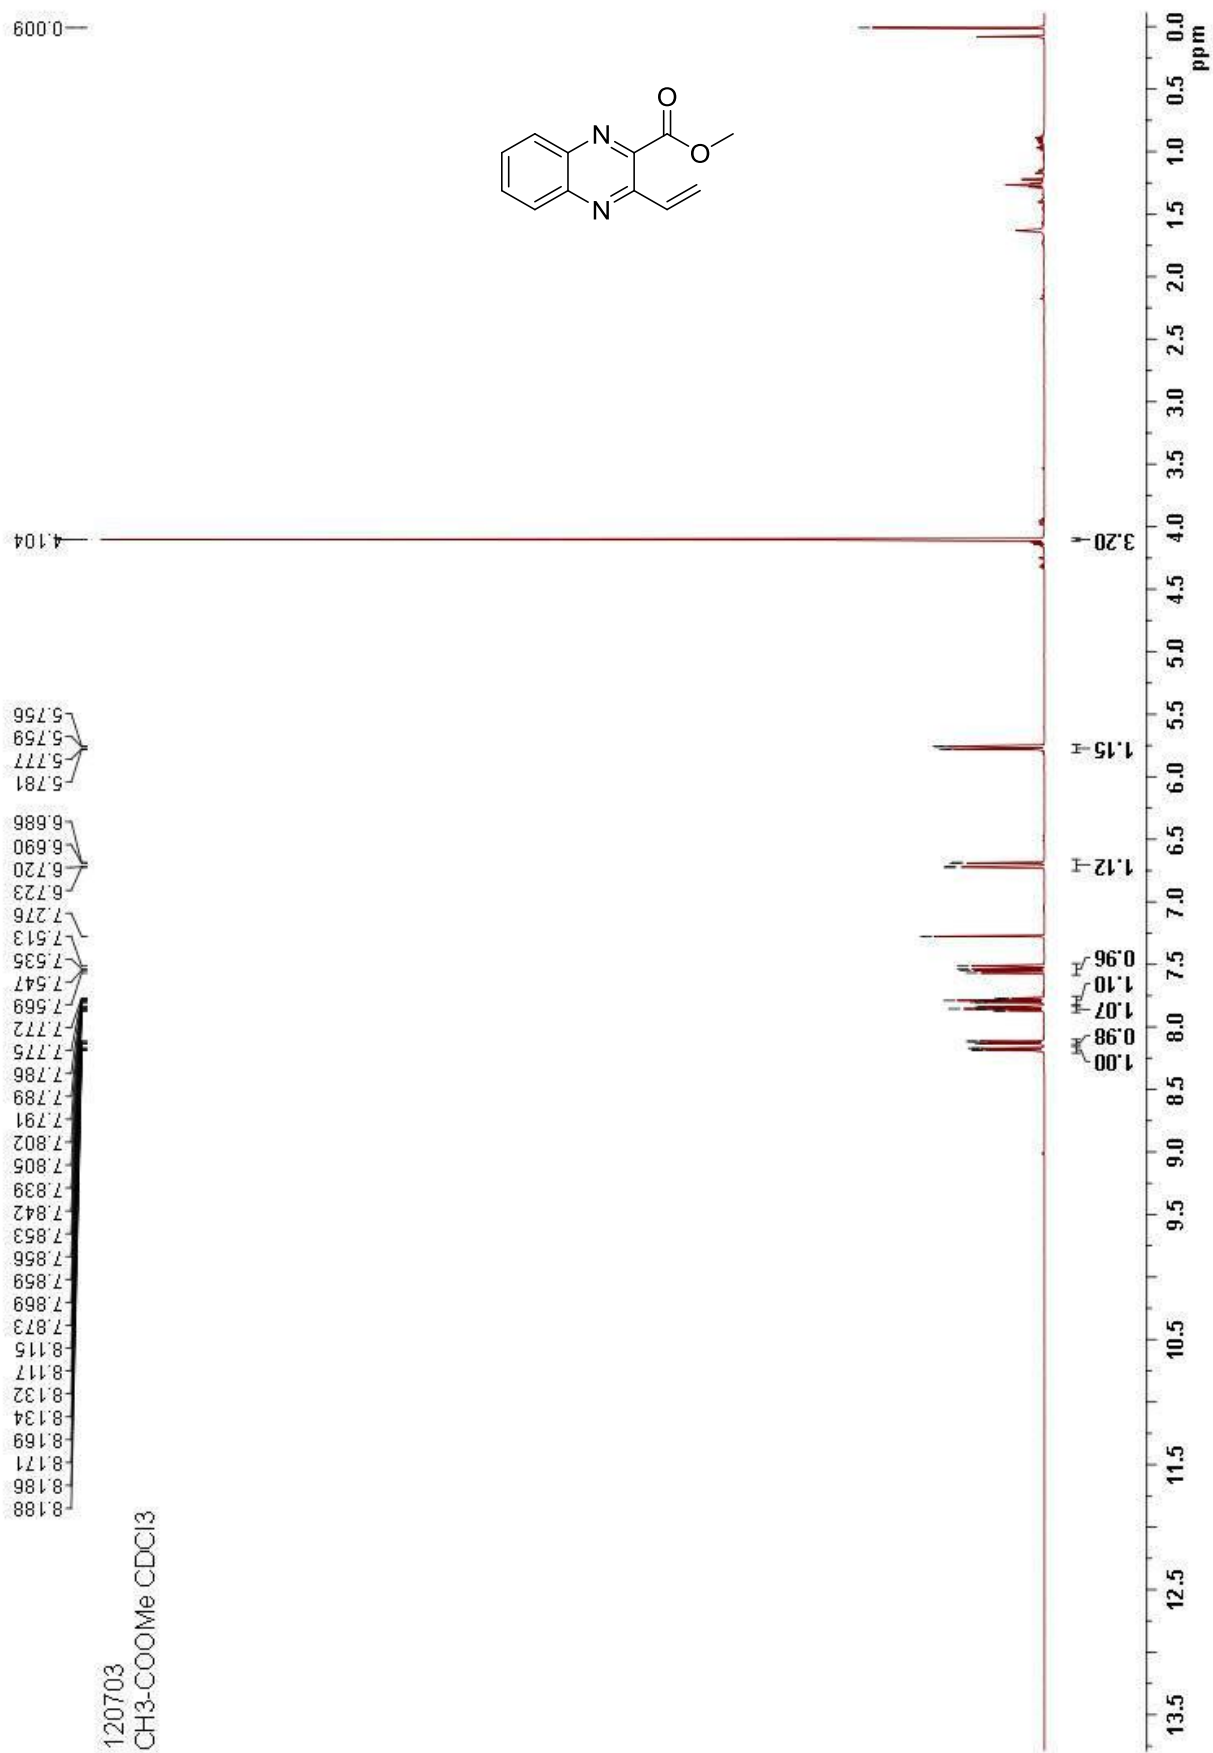



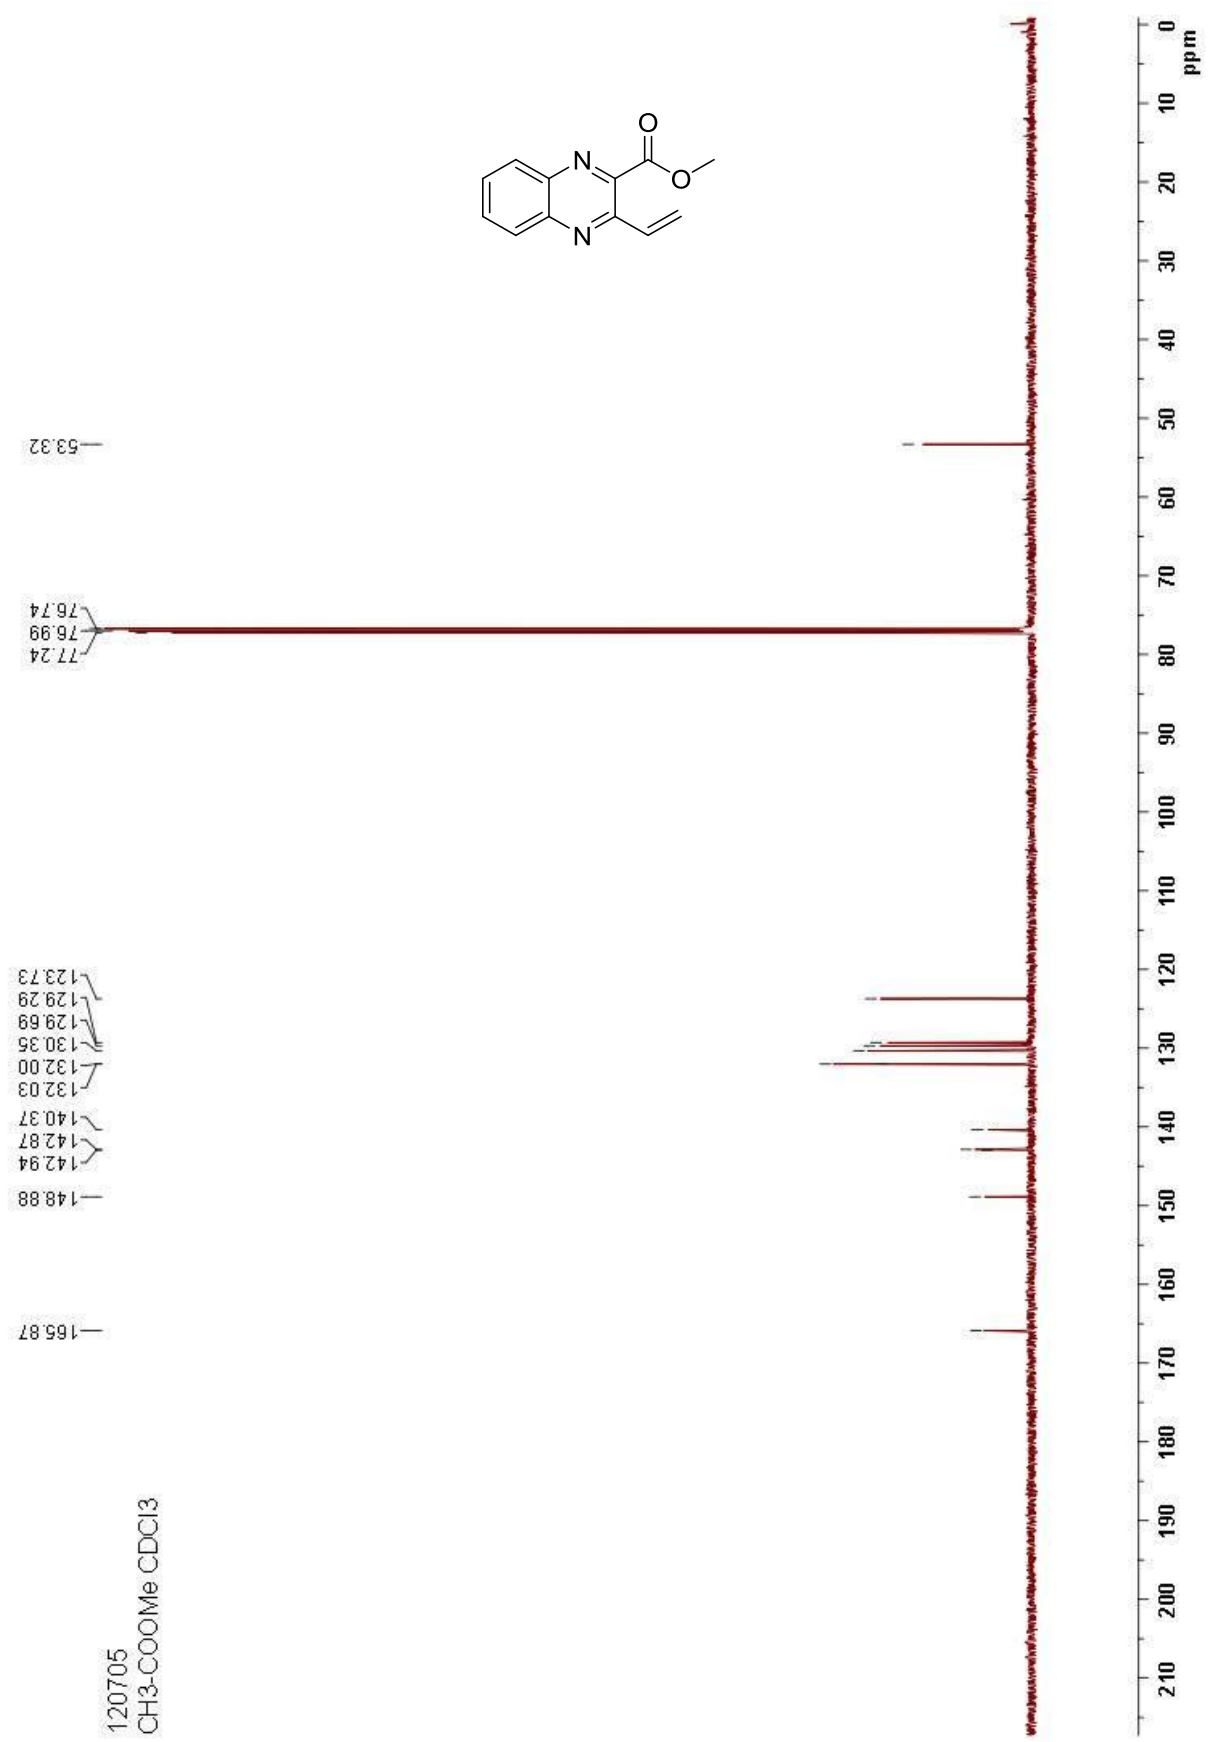

0.024

5.521  
5.525  
5.542  
5.546  
5.589  
5.593  
5.623  
5.627  
5.662  
5.683  
5.696  
7.017  
7.276  
7.449  
7.458  
7.463  
7.486  
7.499  
7.515  
7.519  
7.521  
7.536  
7.550  
7.551  
7.713  
7.715  
7.727  
7.729  
7.732  
7.743  
7.746  
7.805  
7.821  
8.048  
8.159  
8.176

110714  
CH3-KL-Ph CDCl3

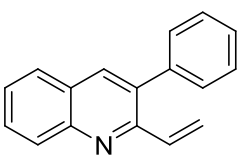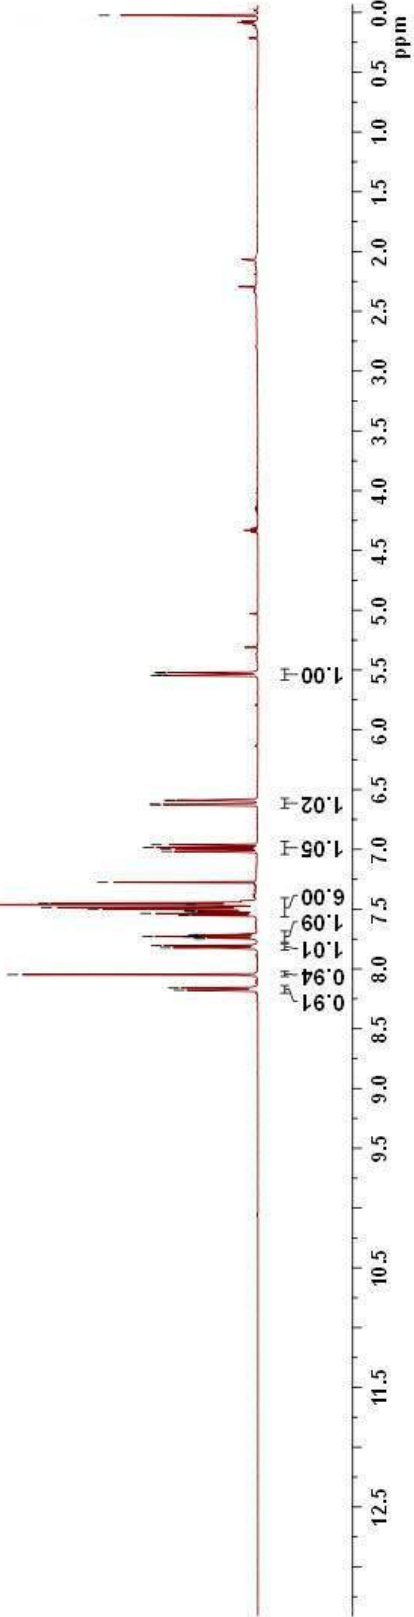

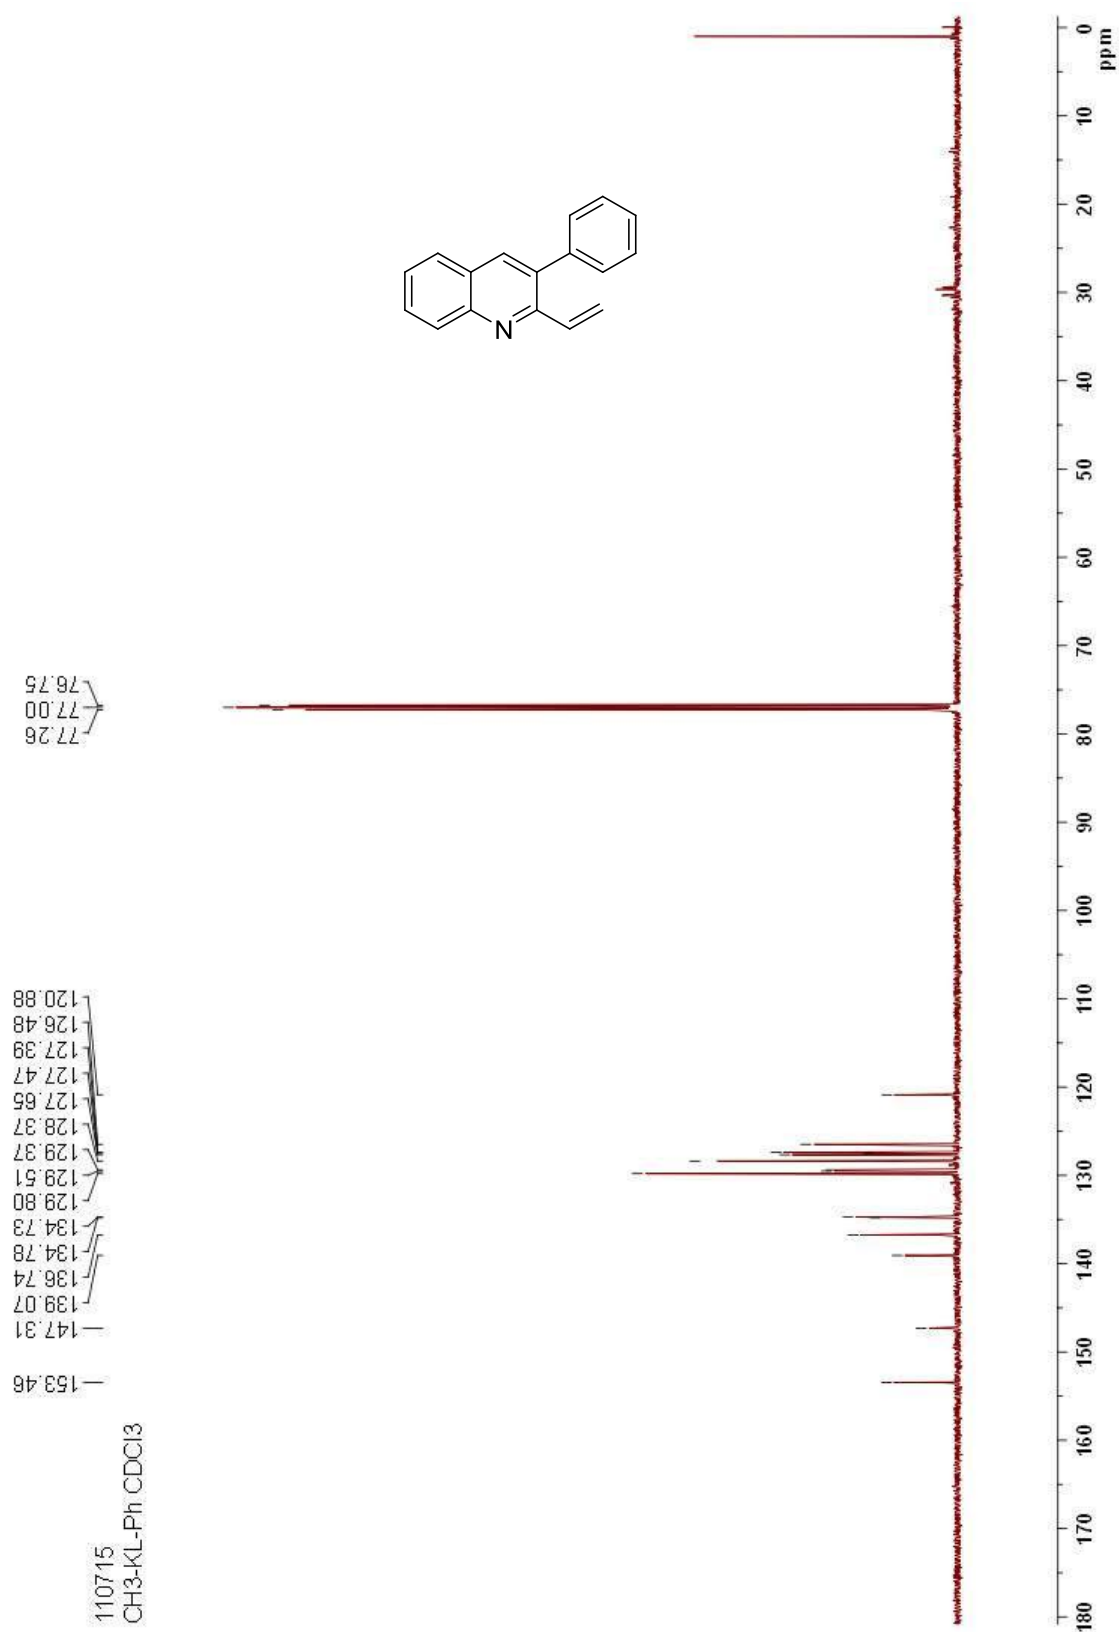

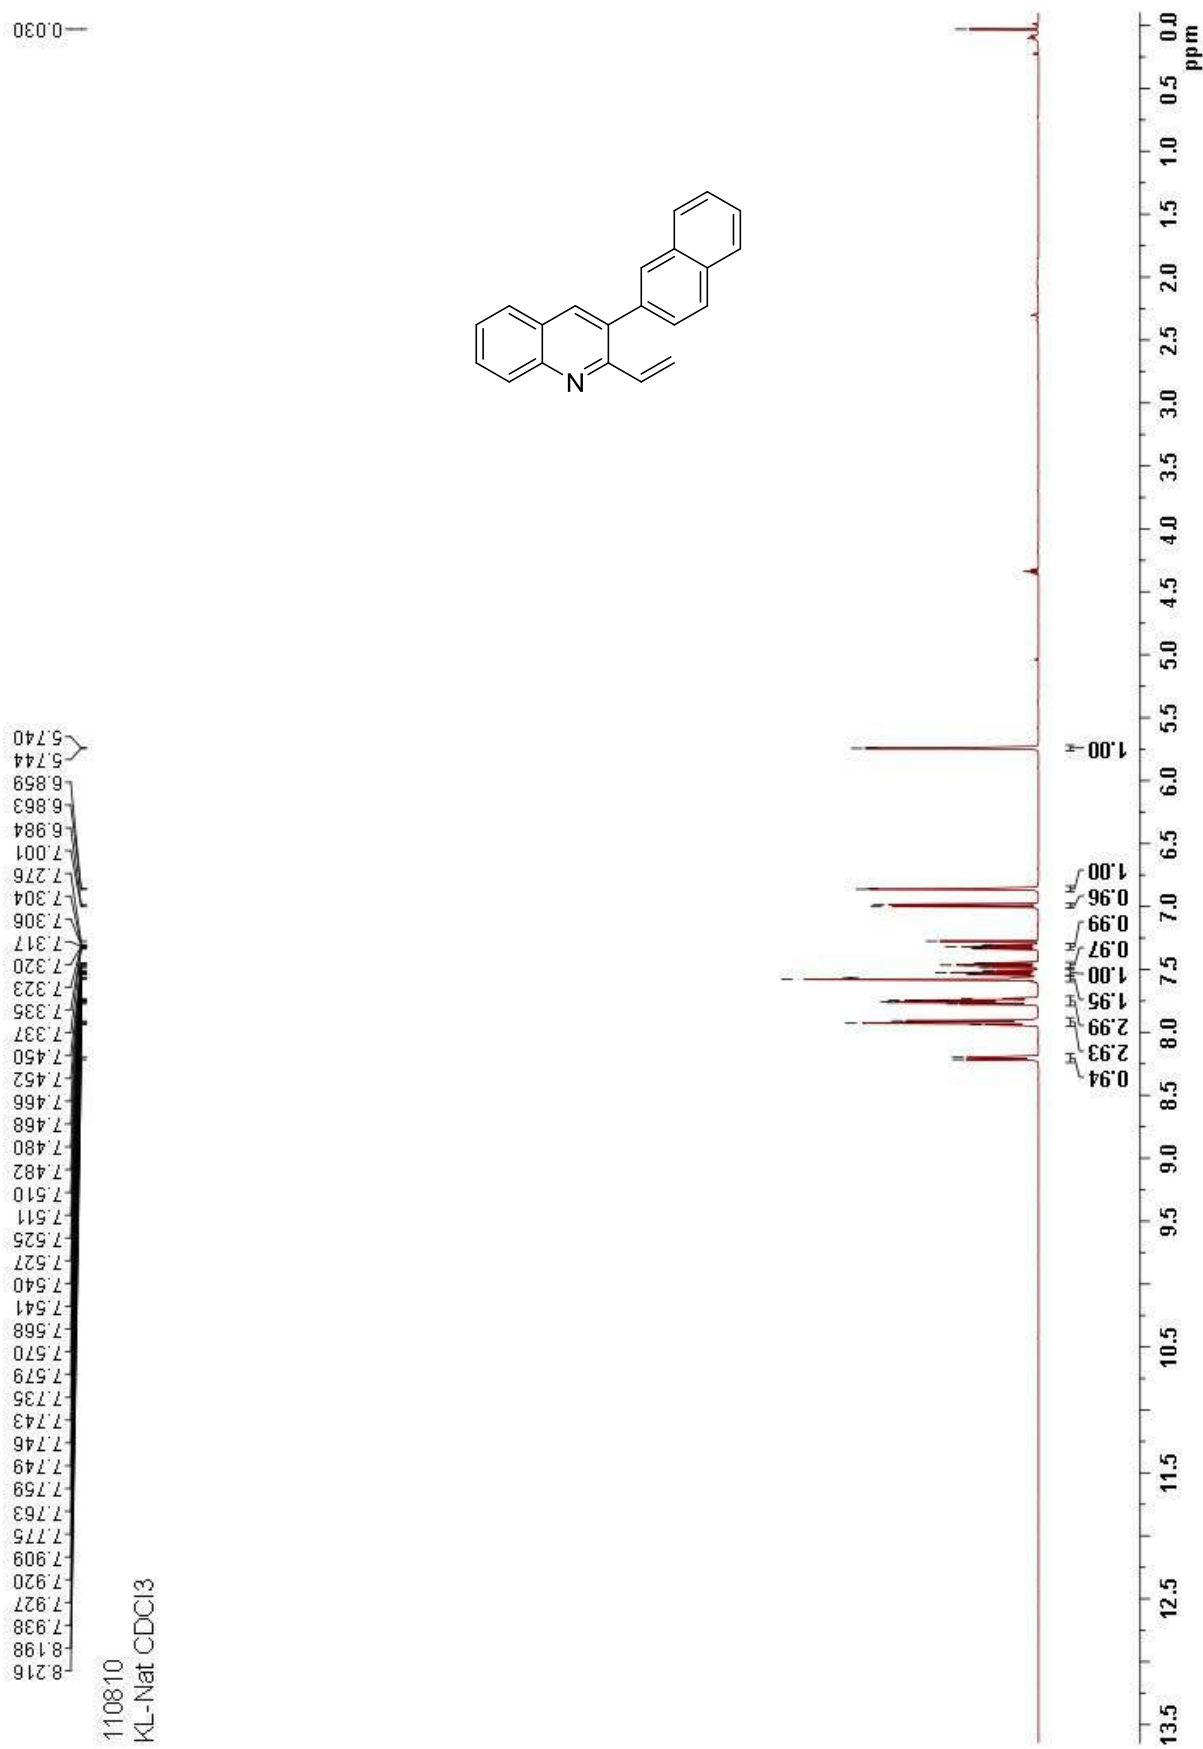

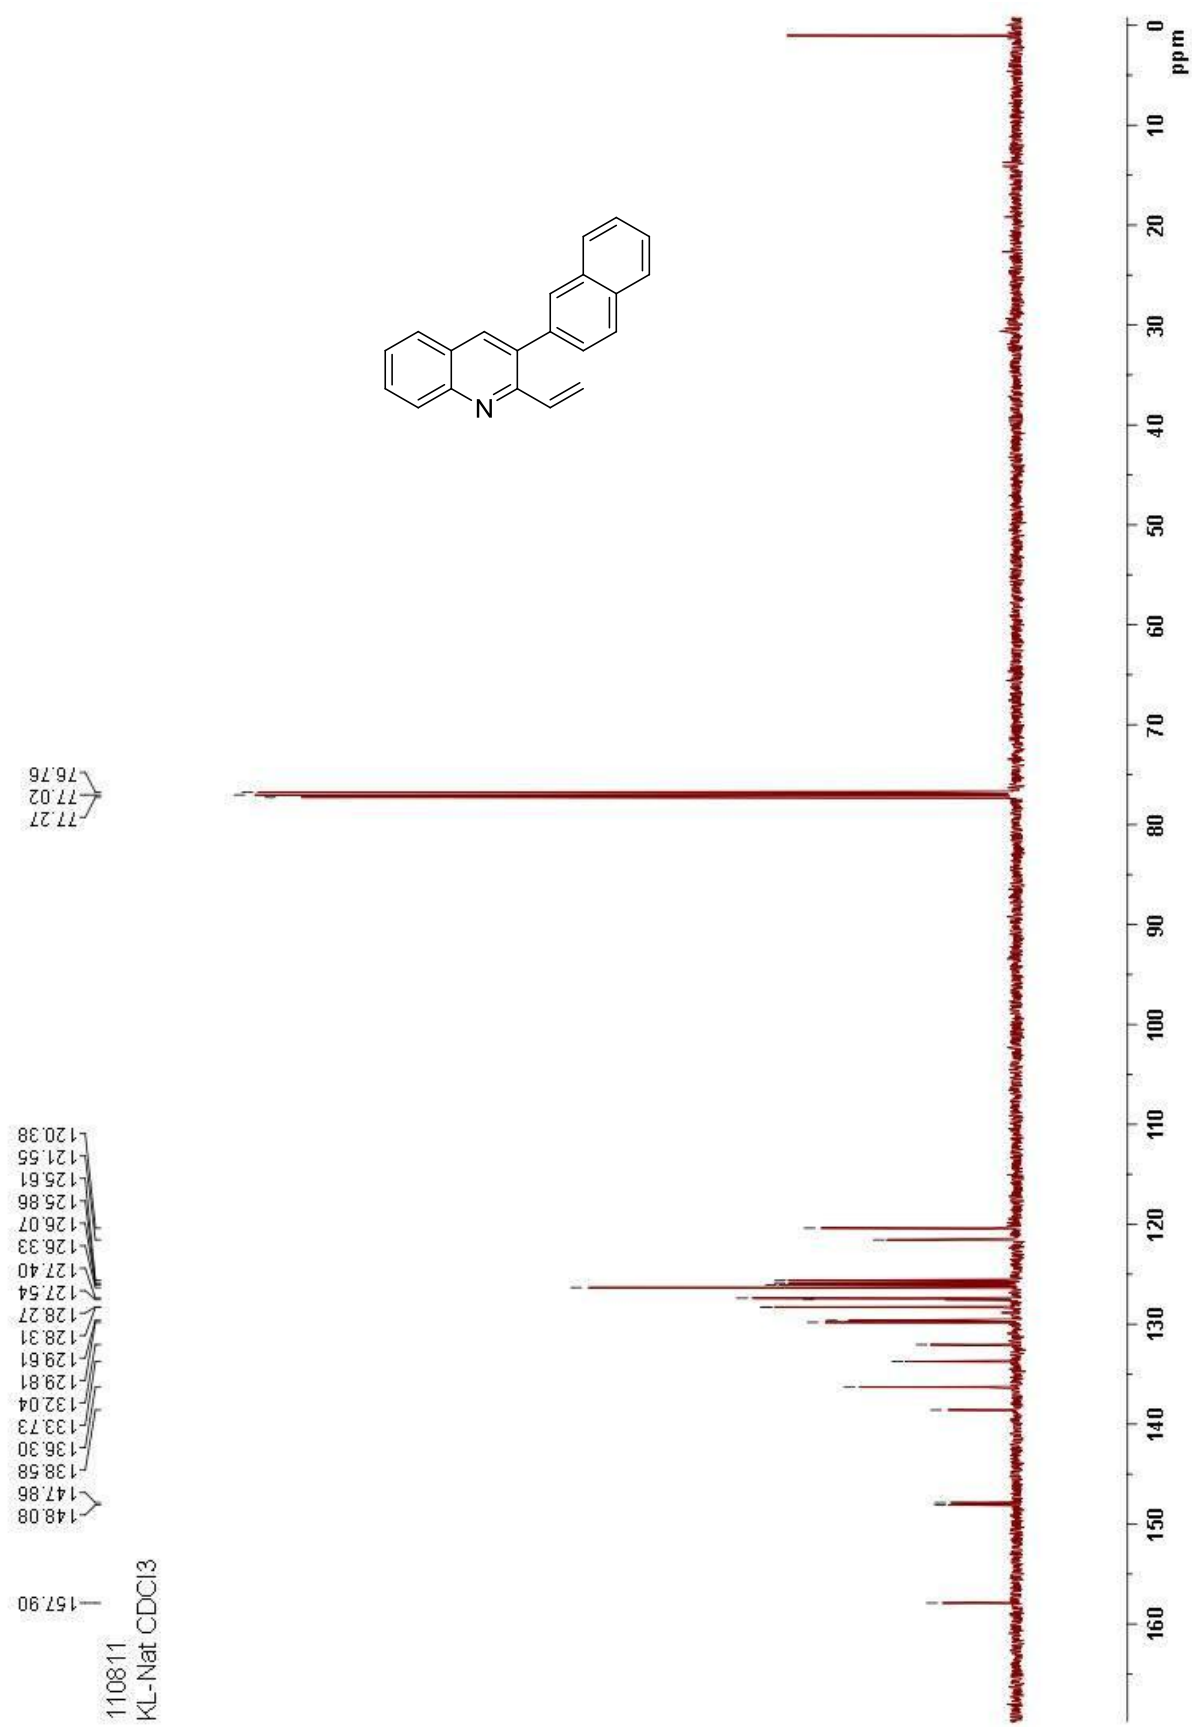

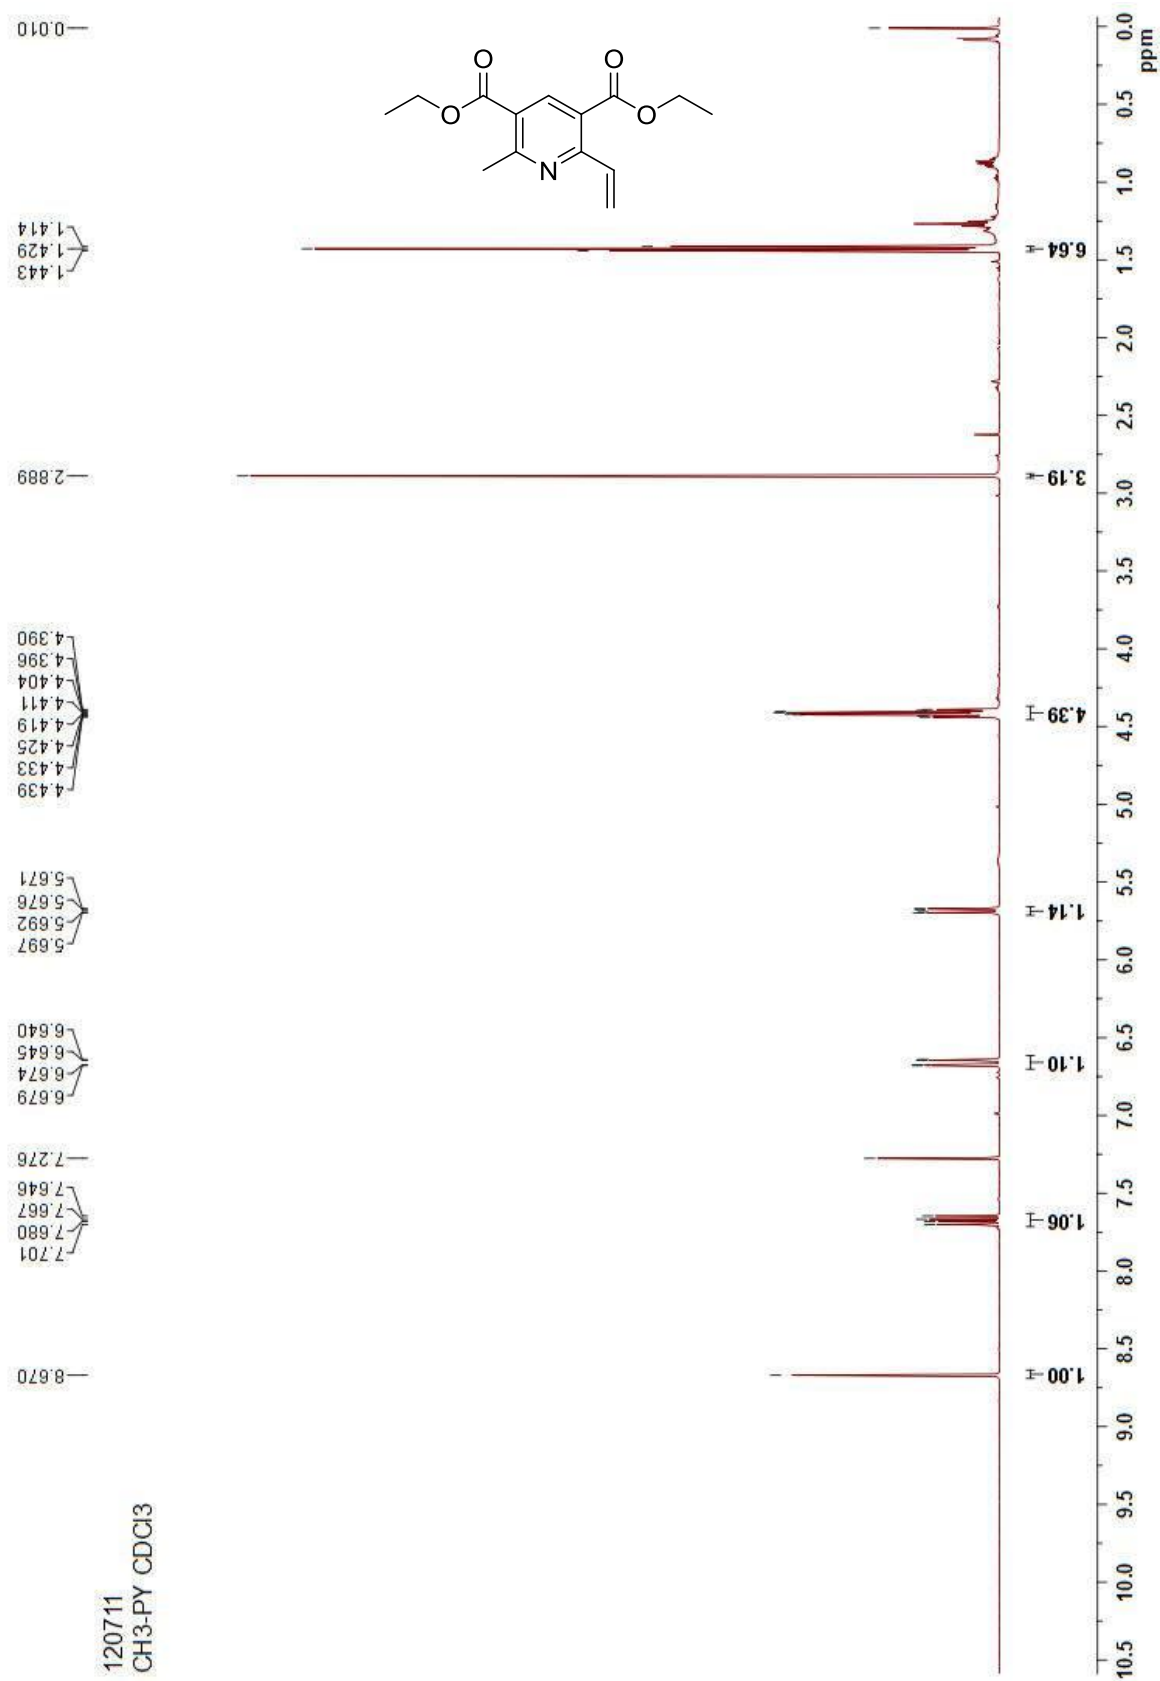

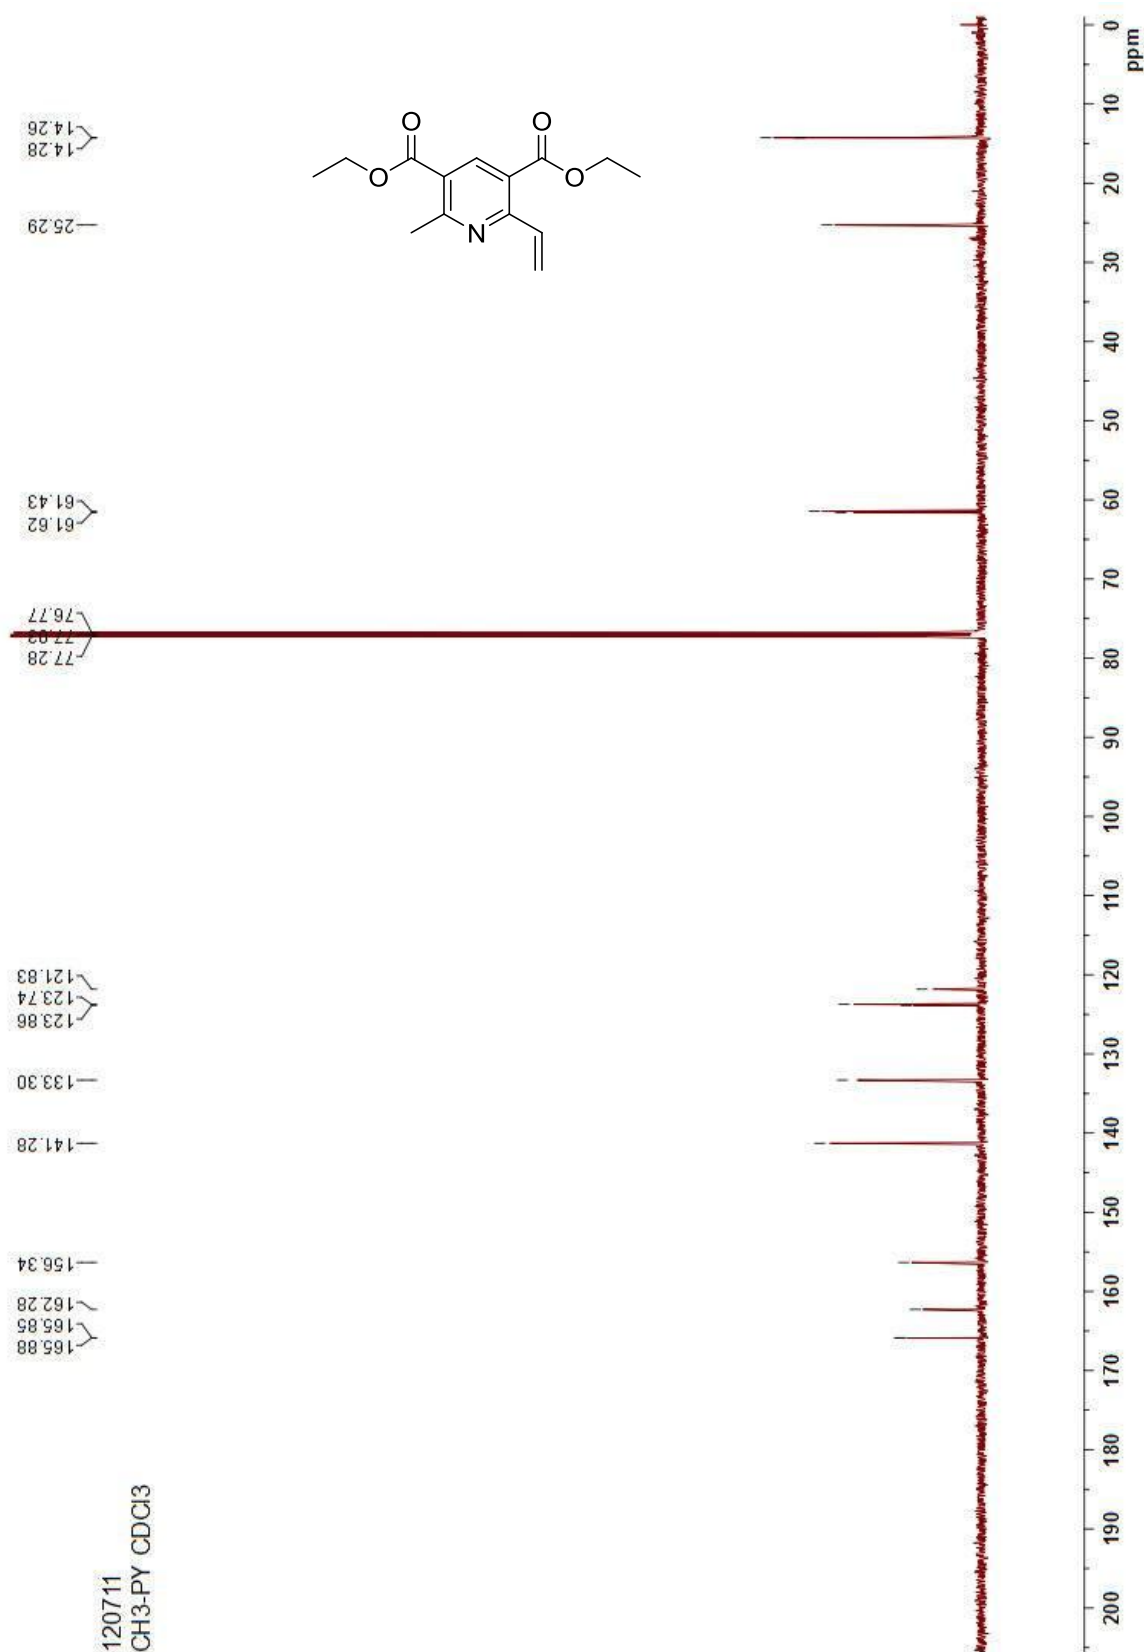

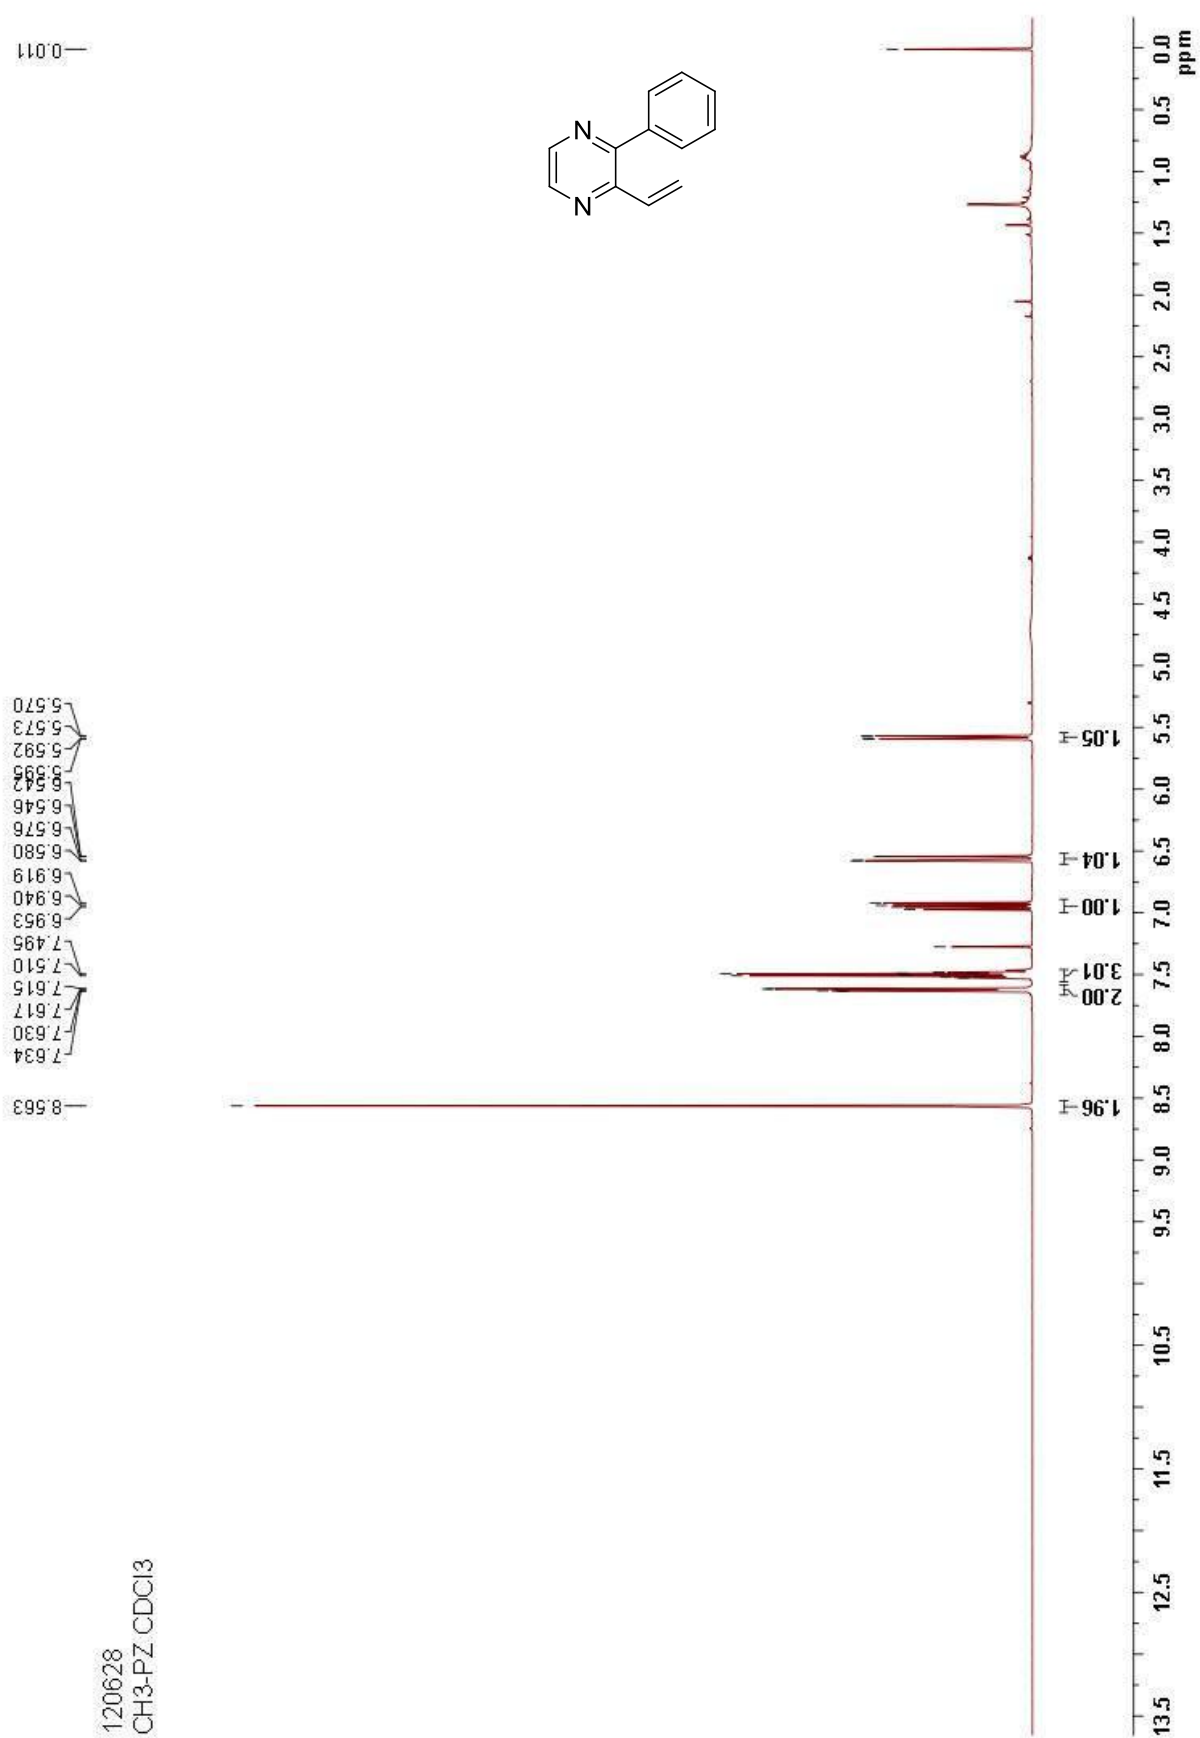



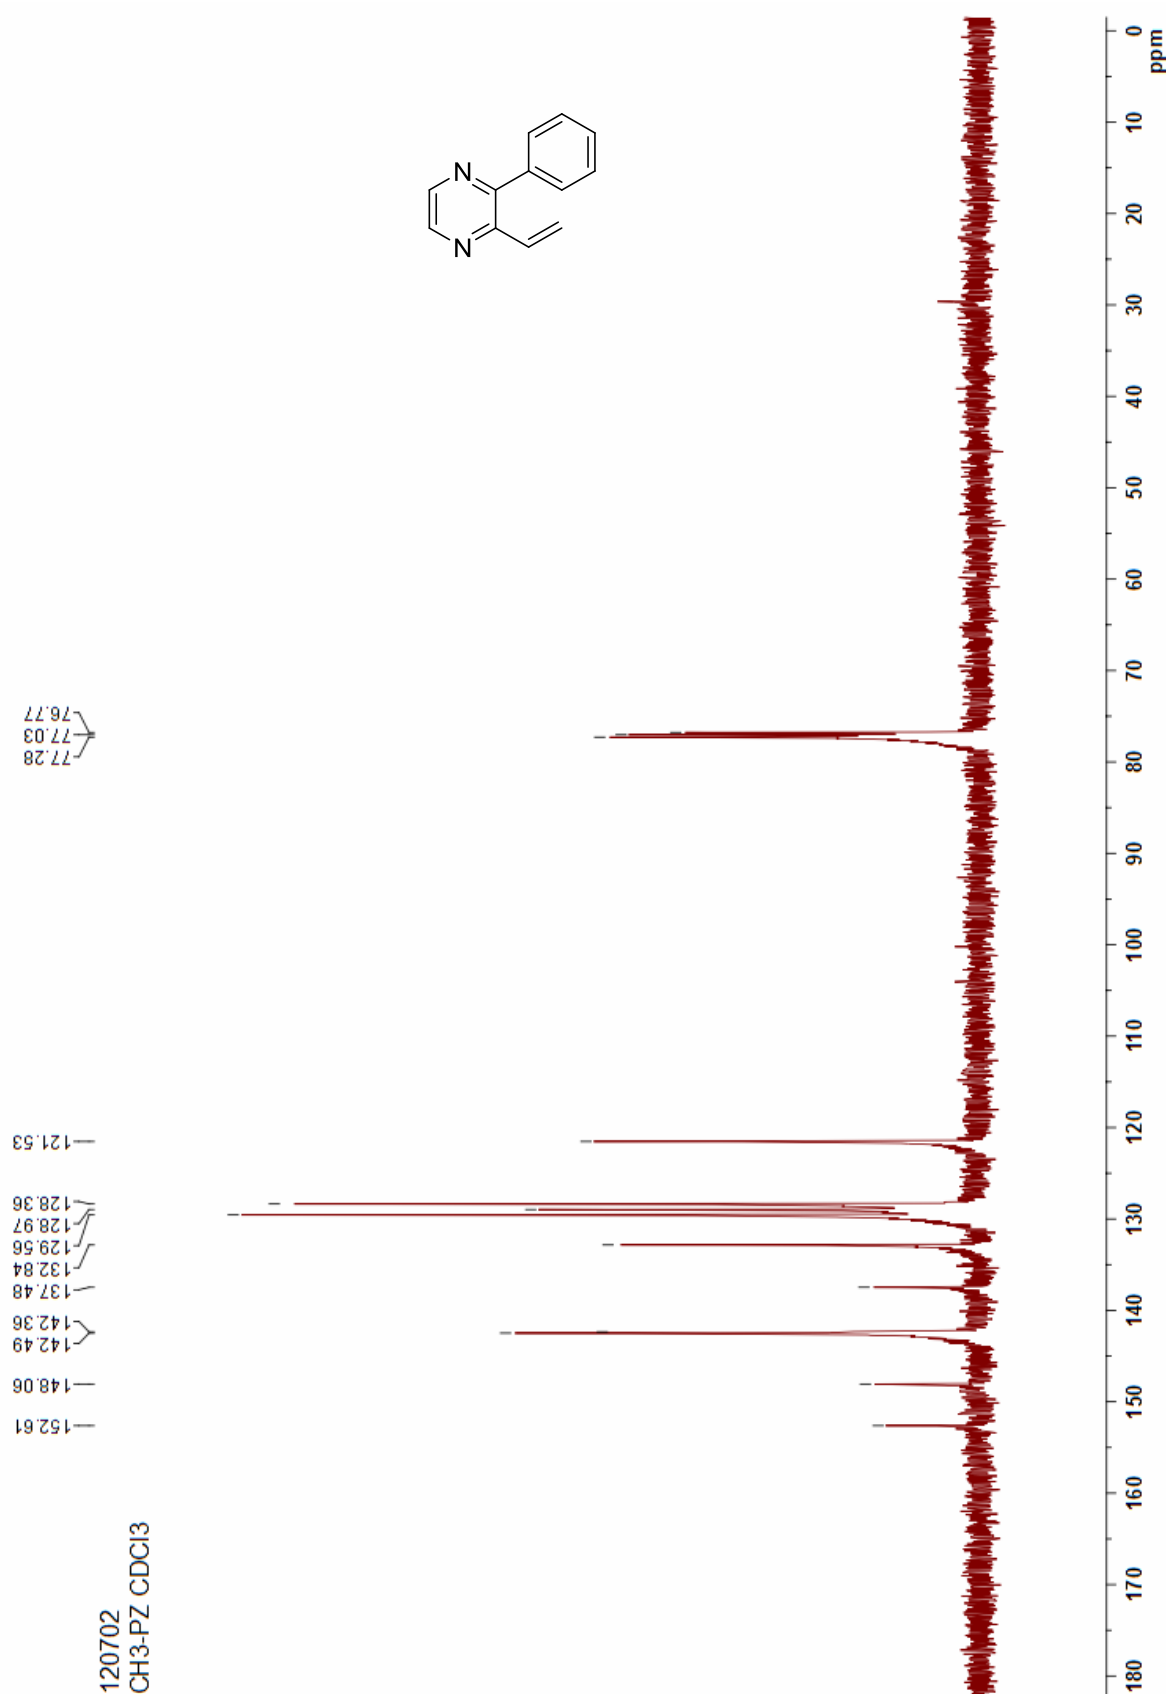

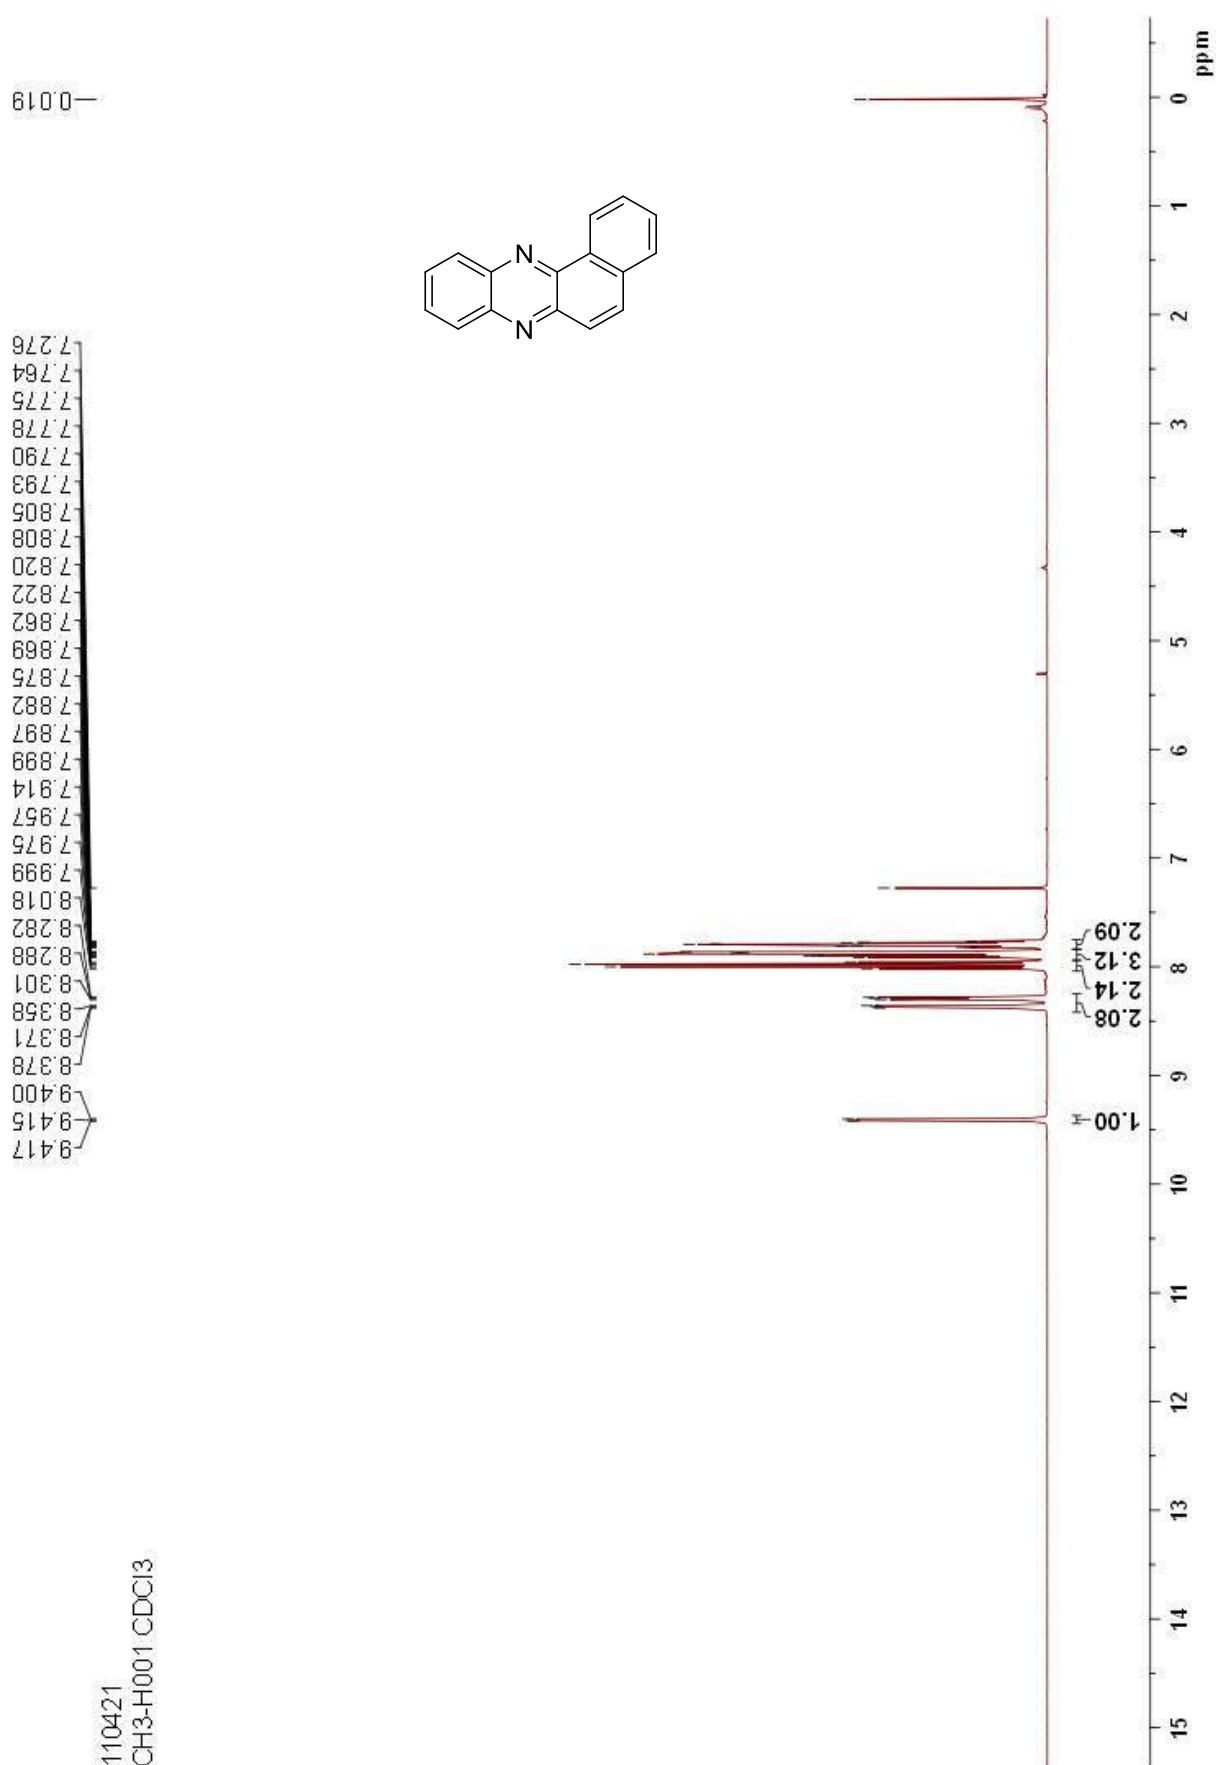

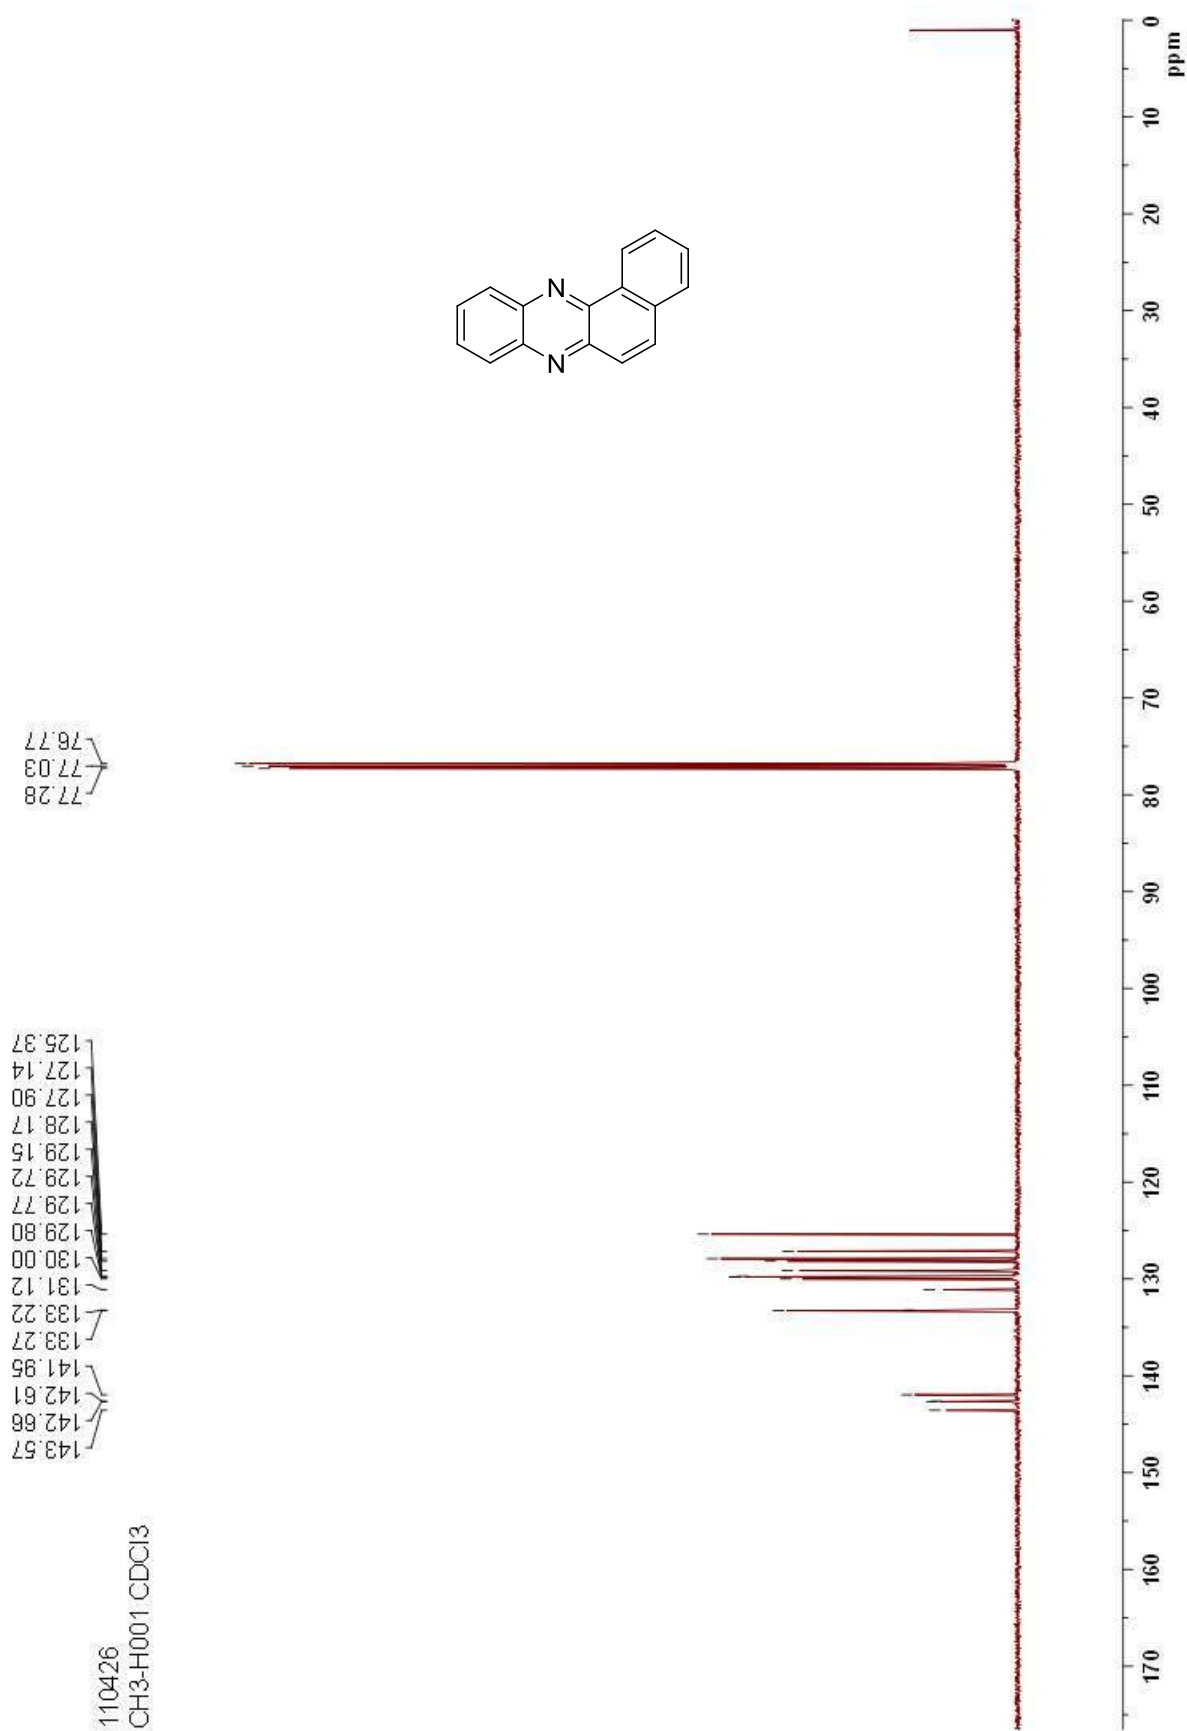

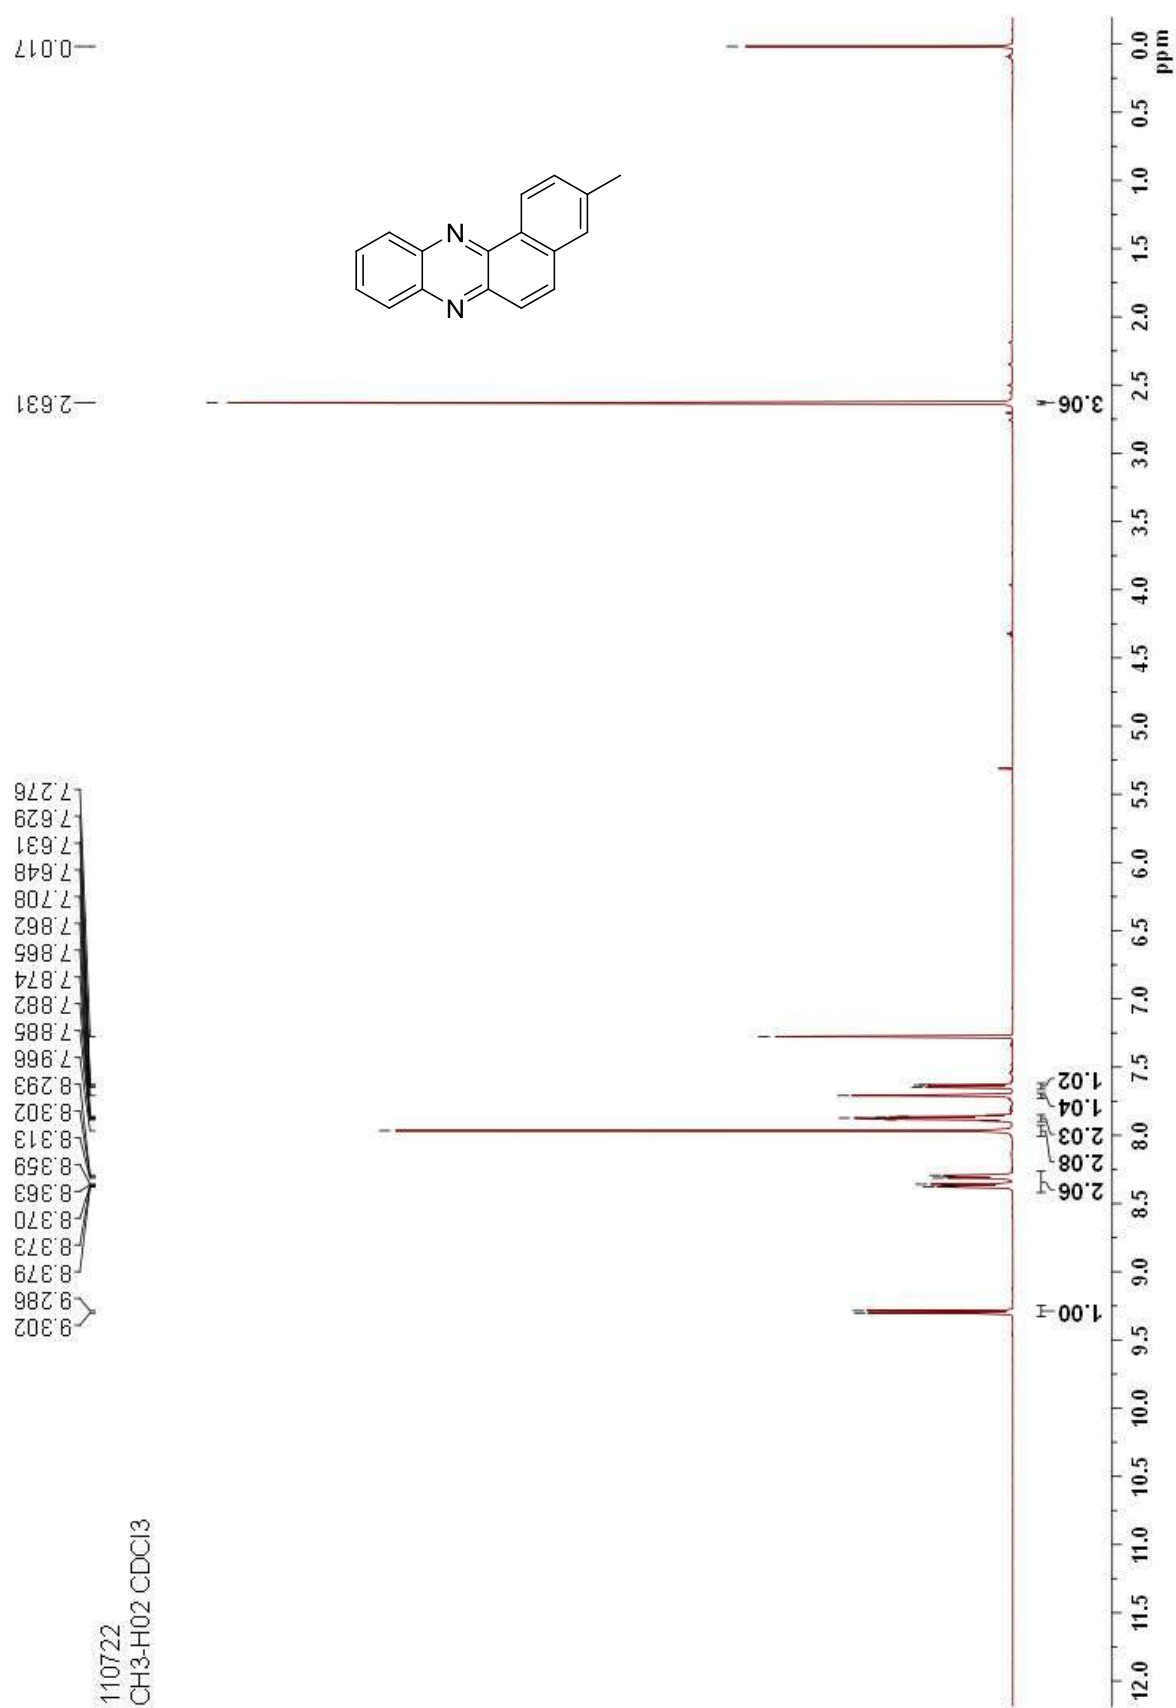

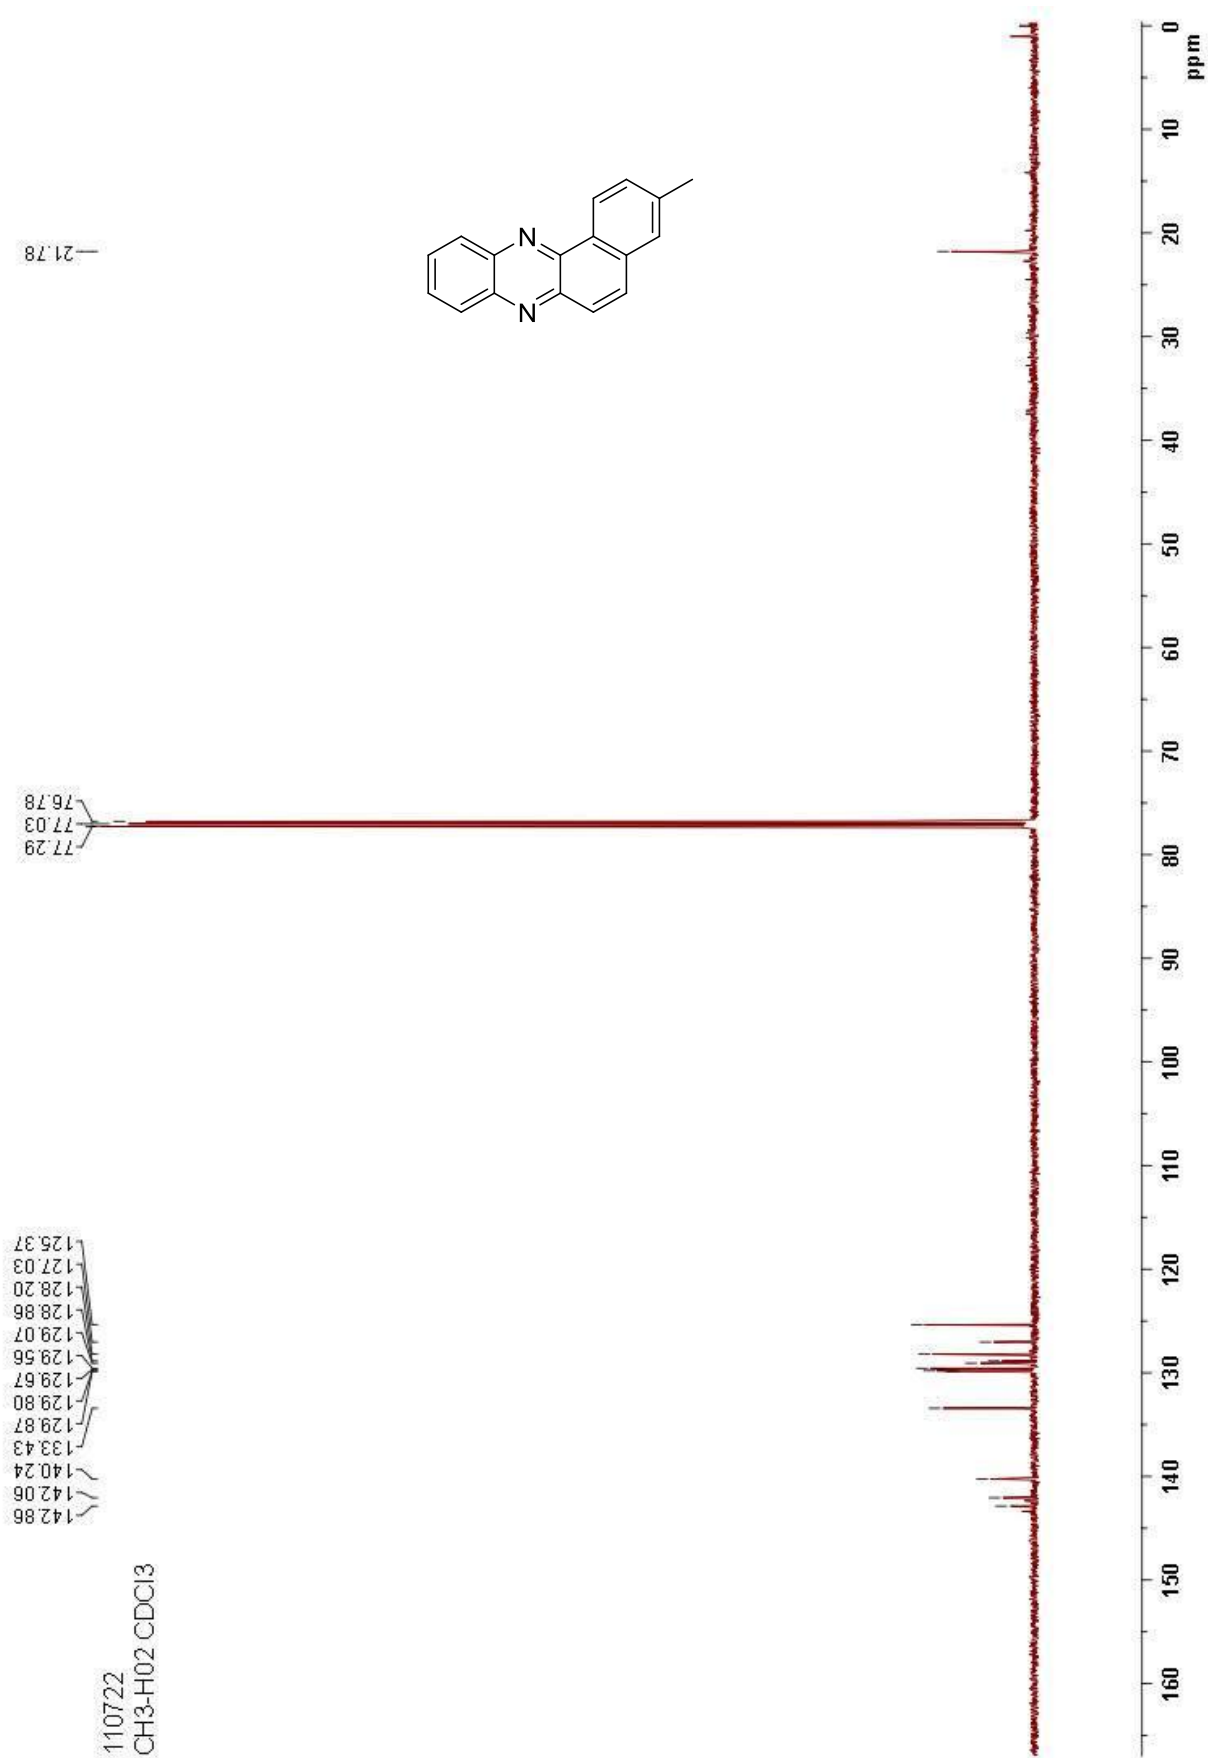

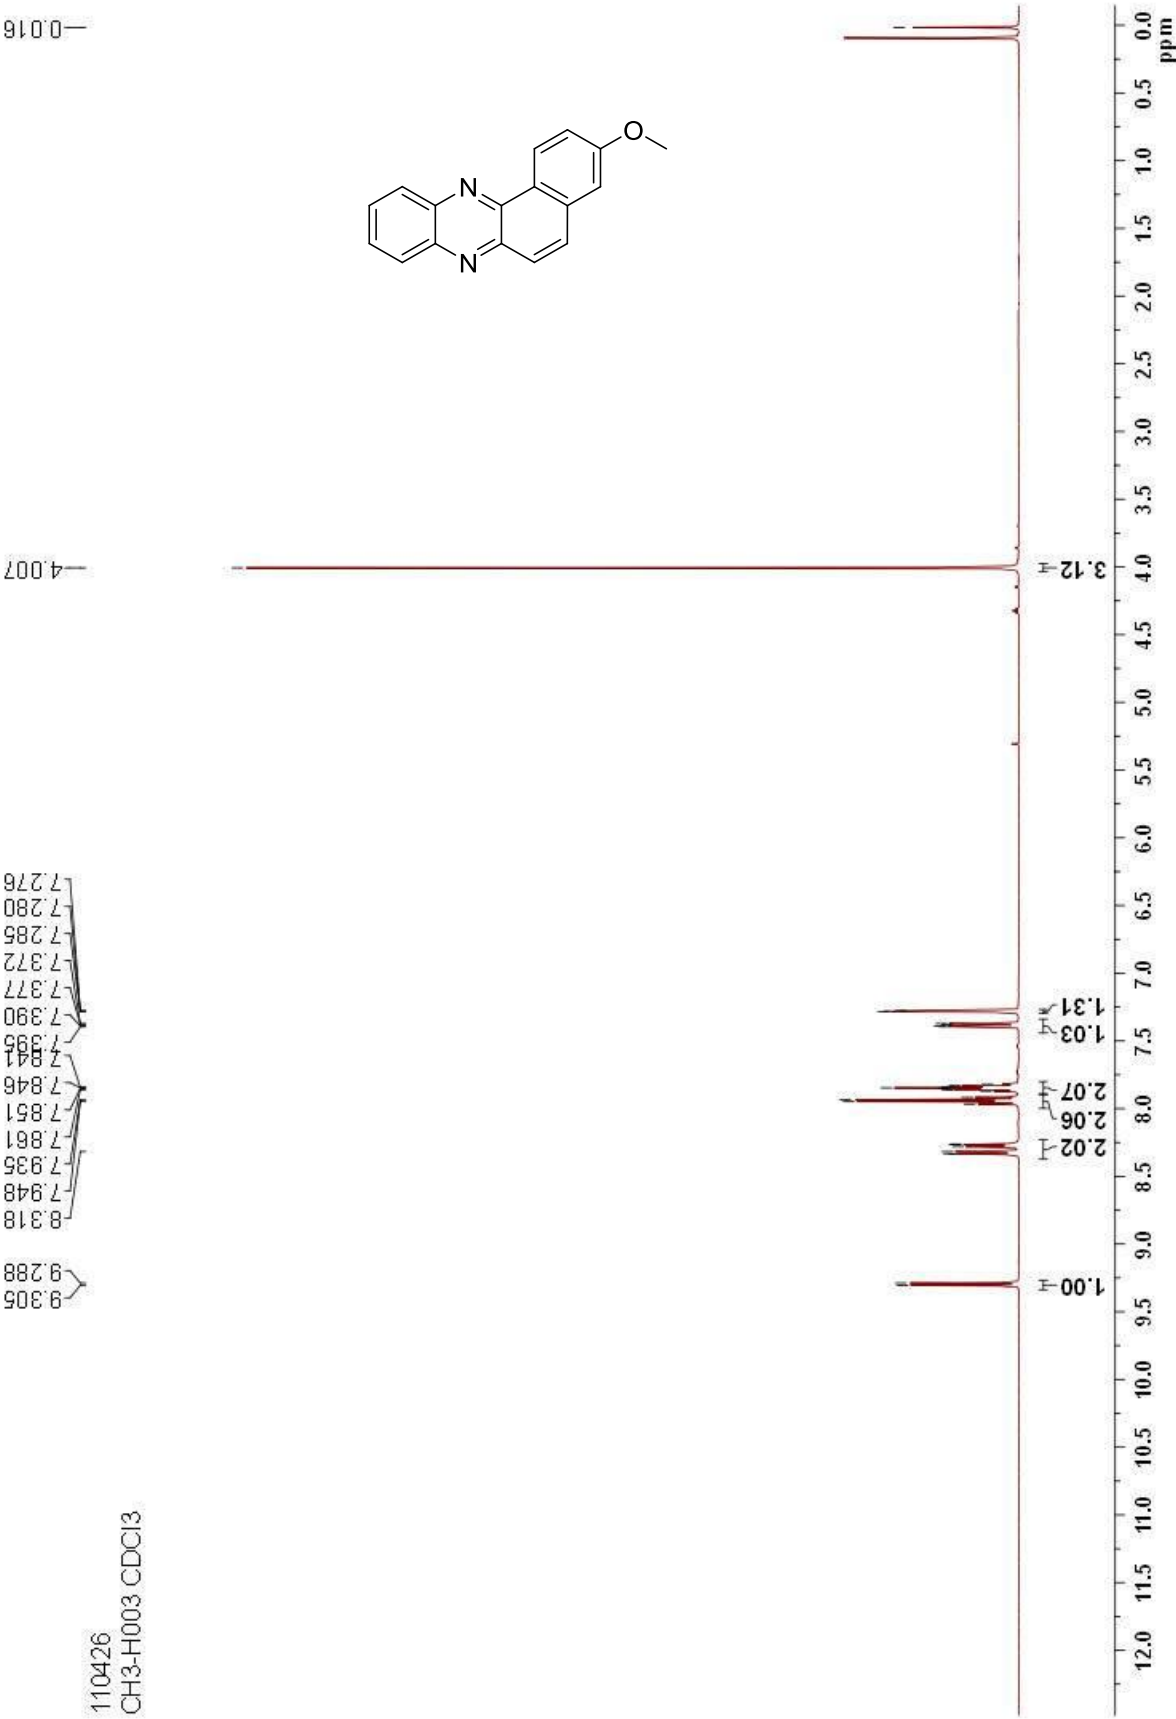

110426  
CH3-H003 CDCl3

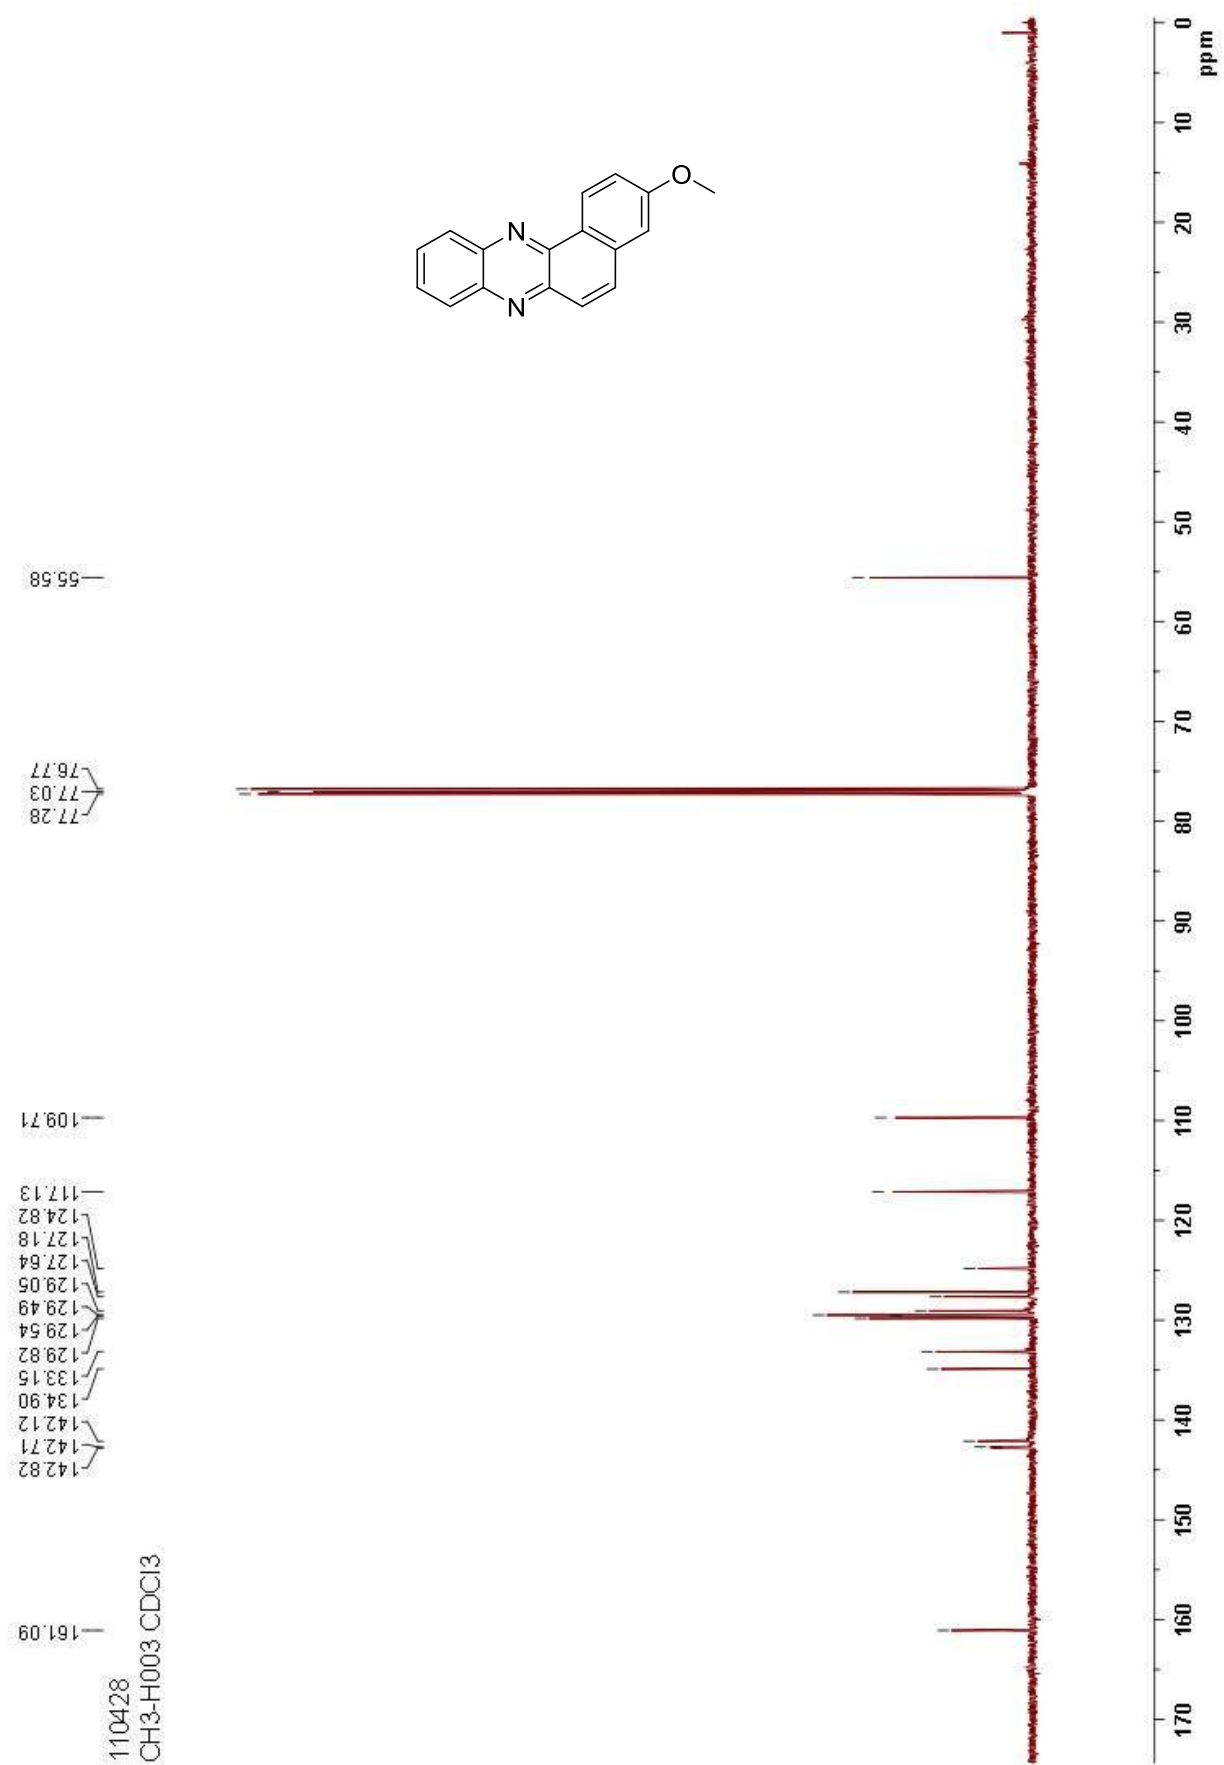

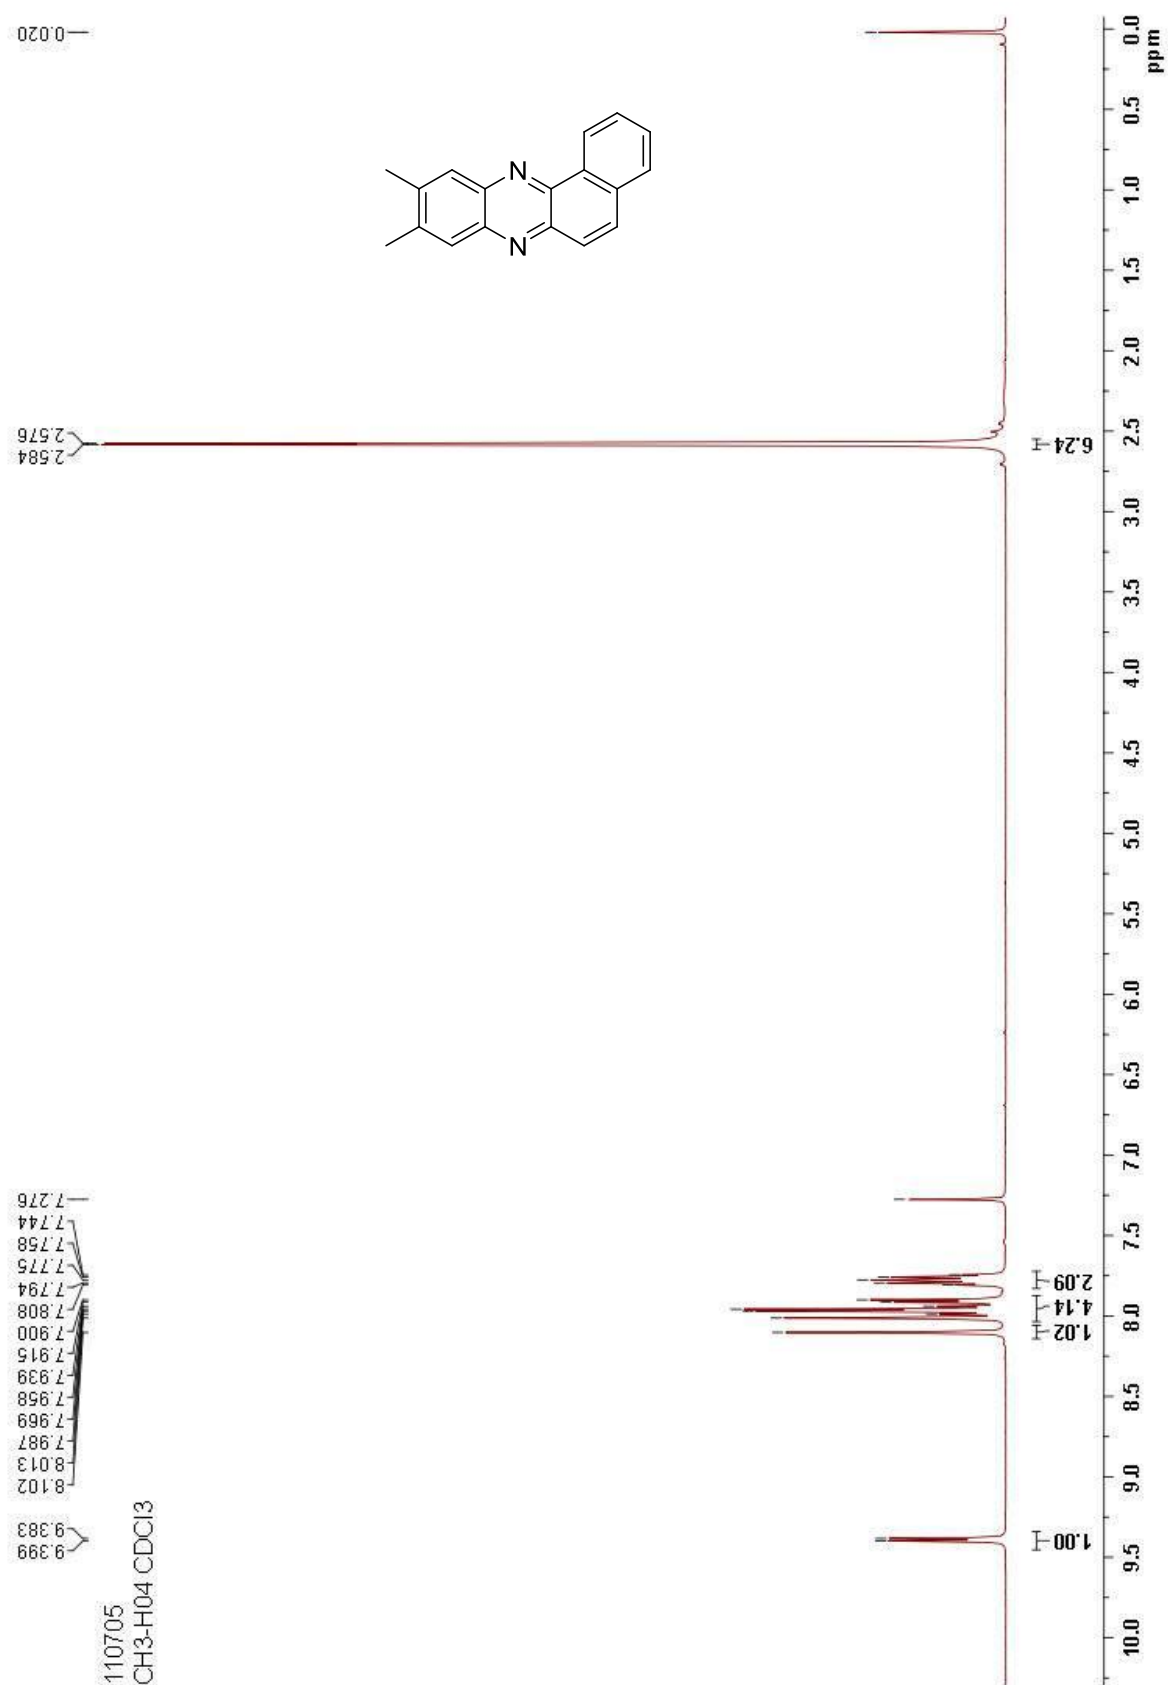



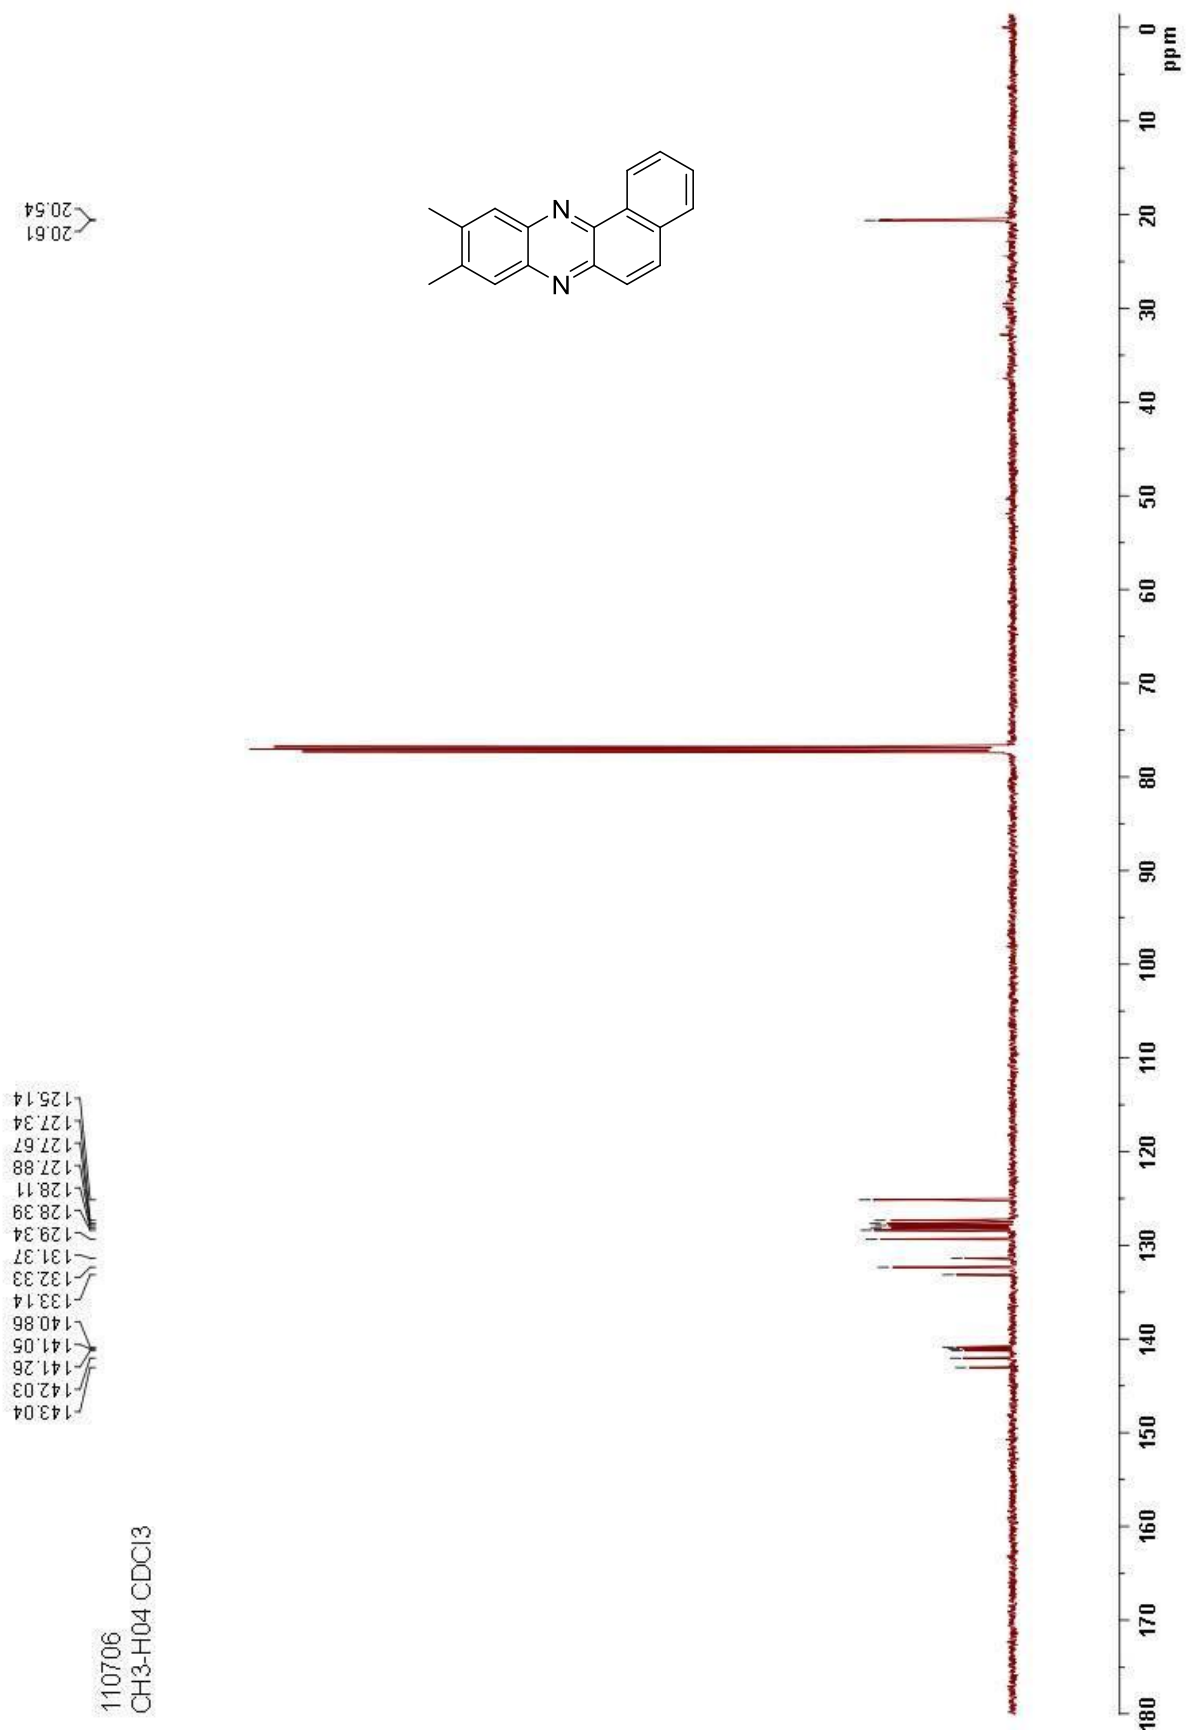

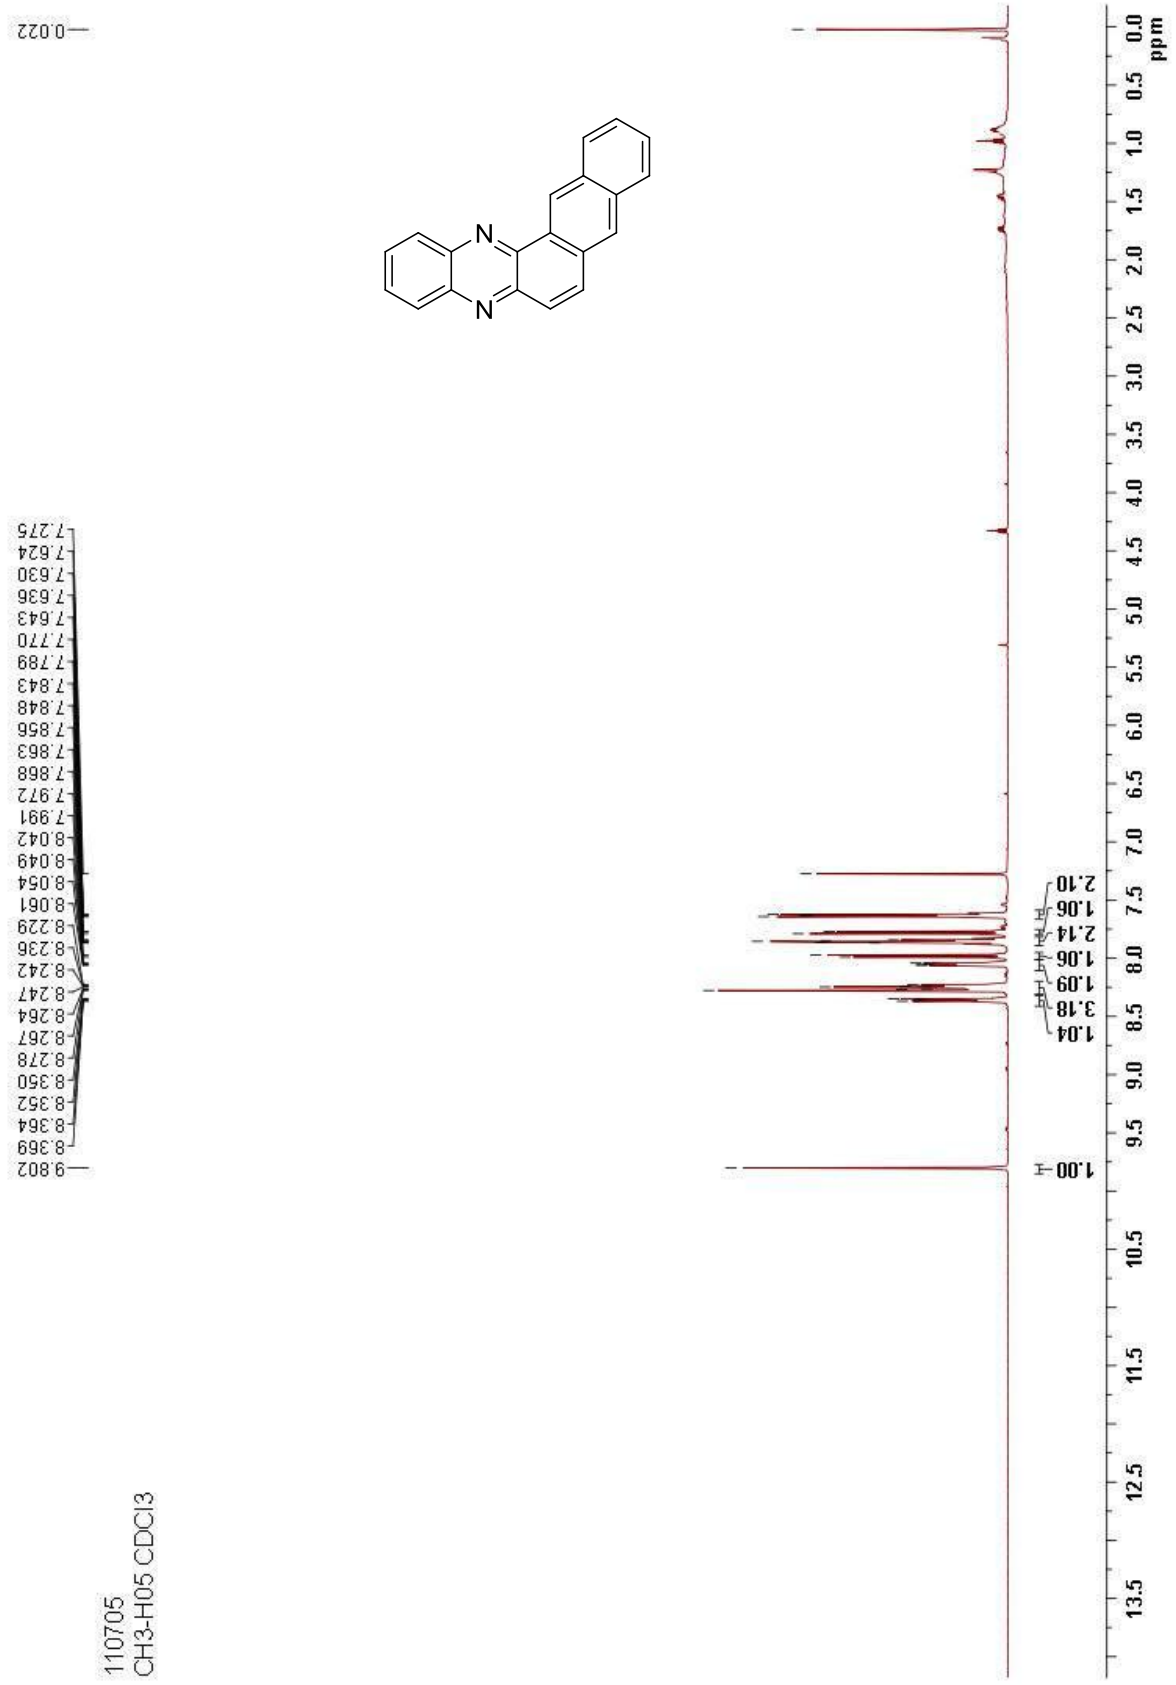

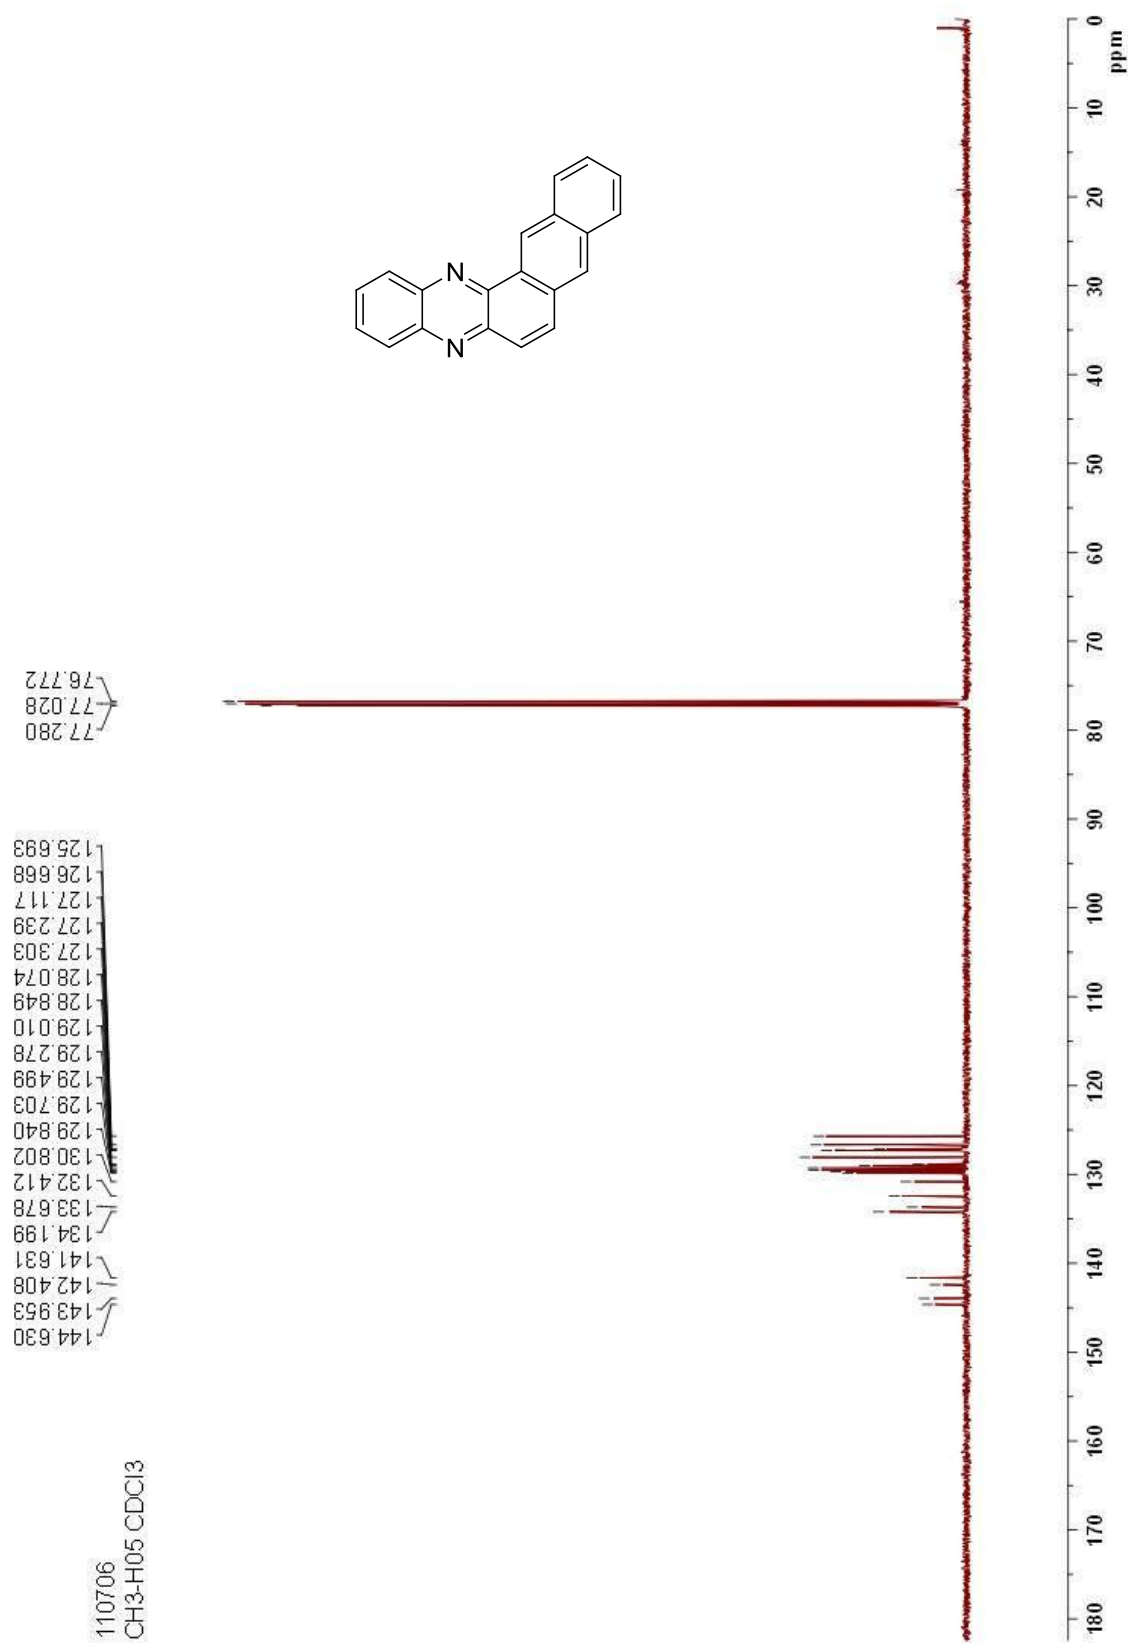

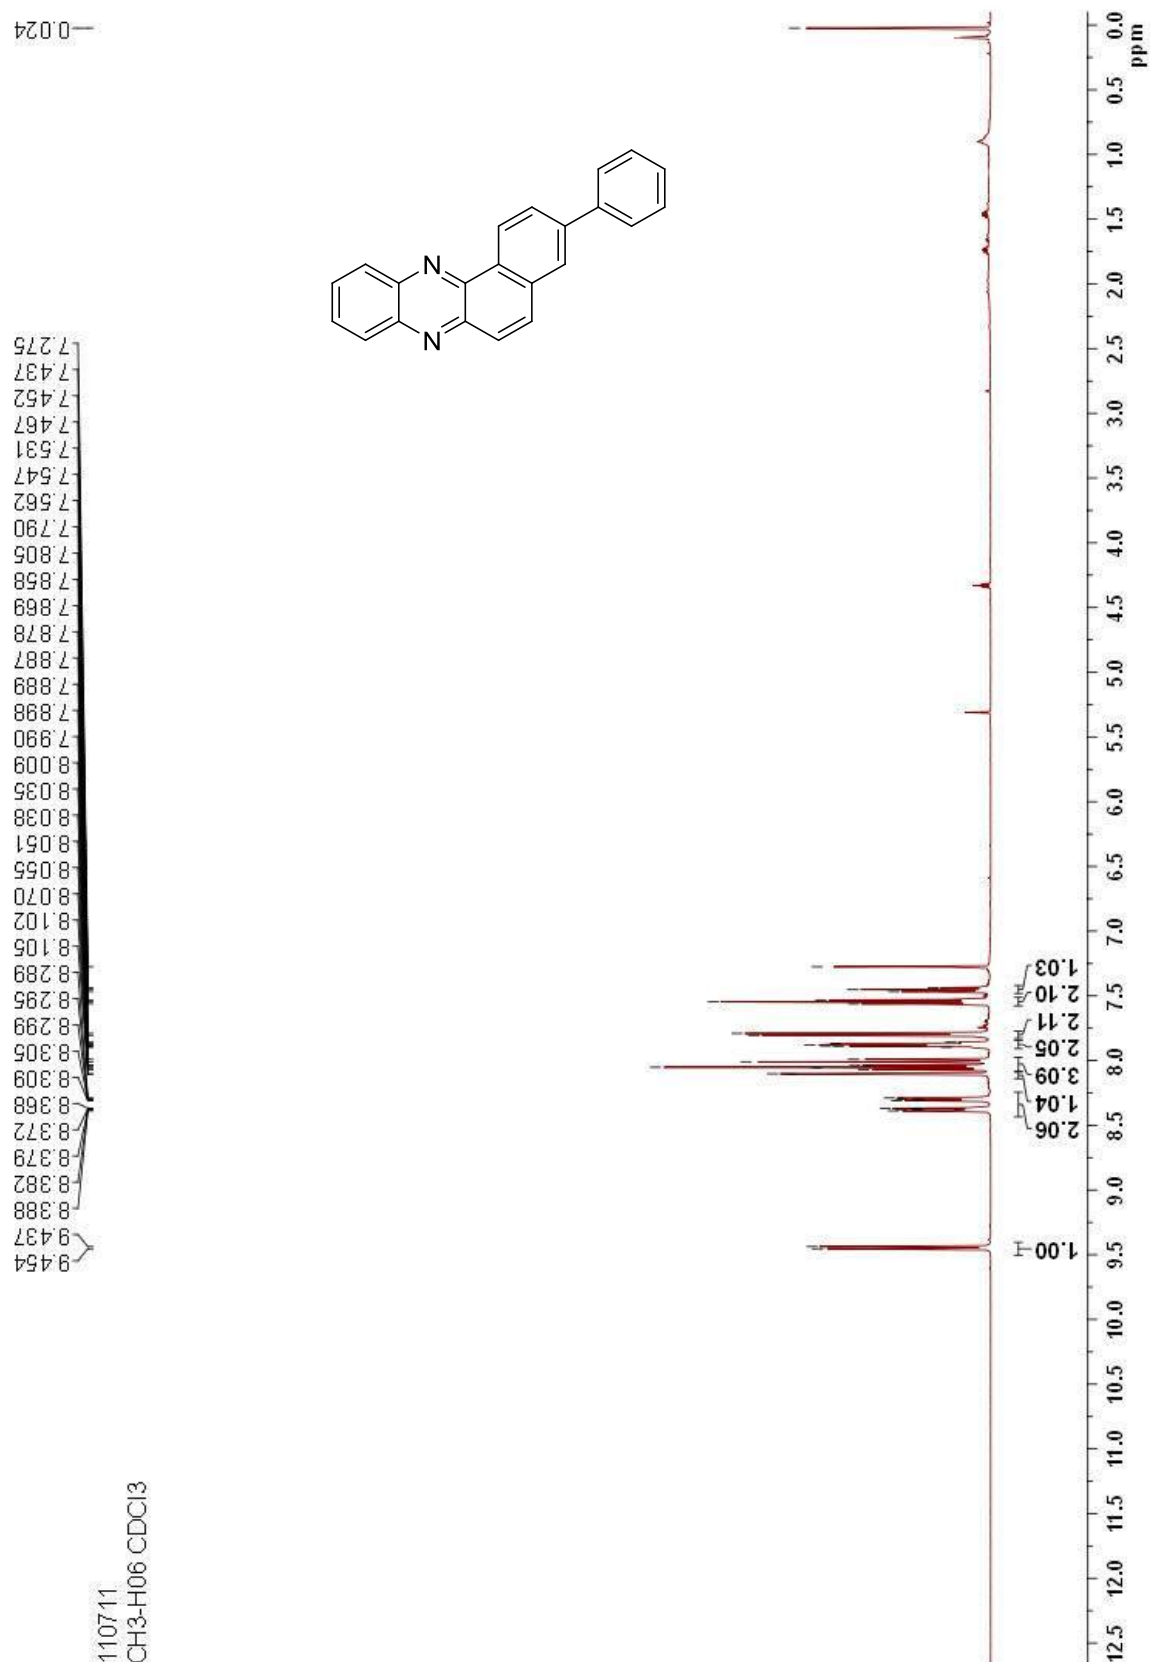

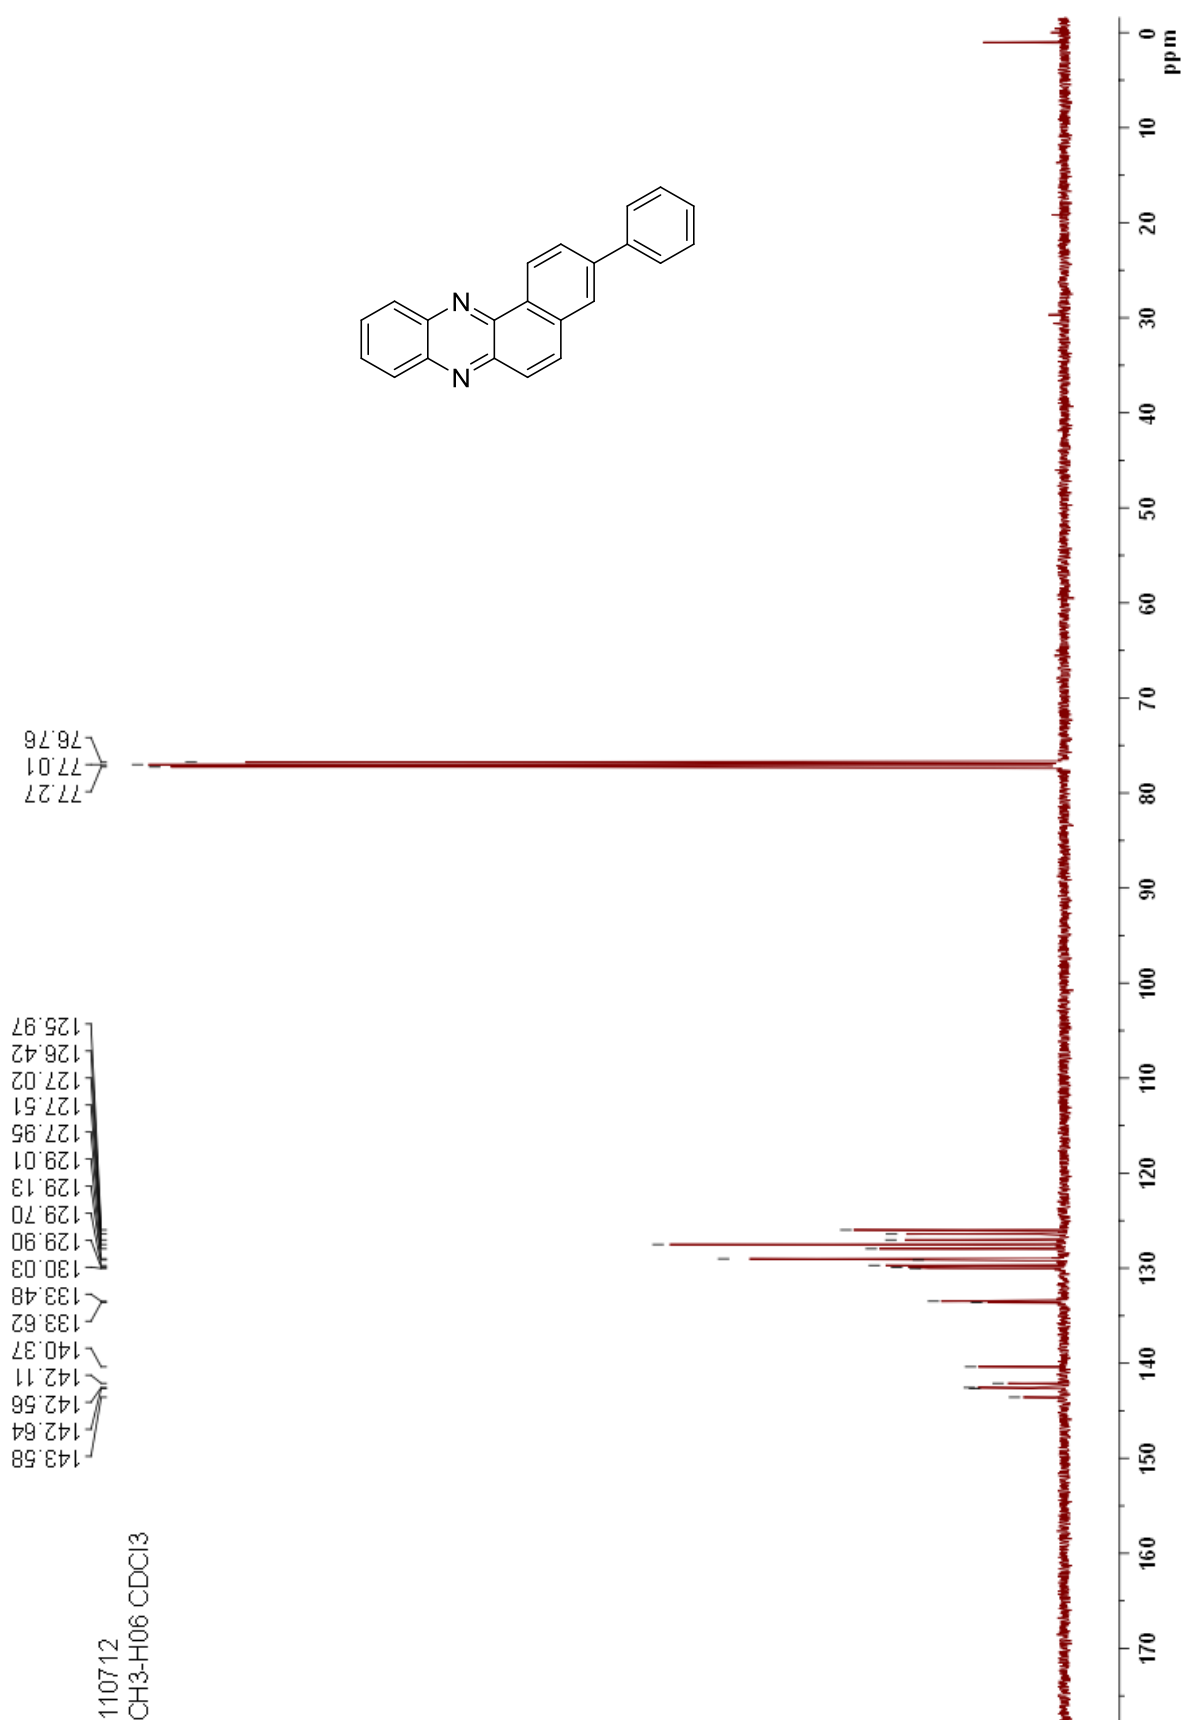

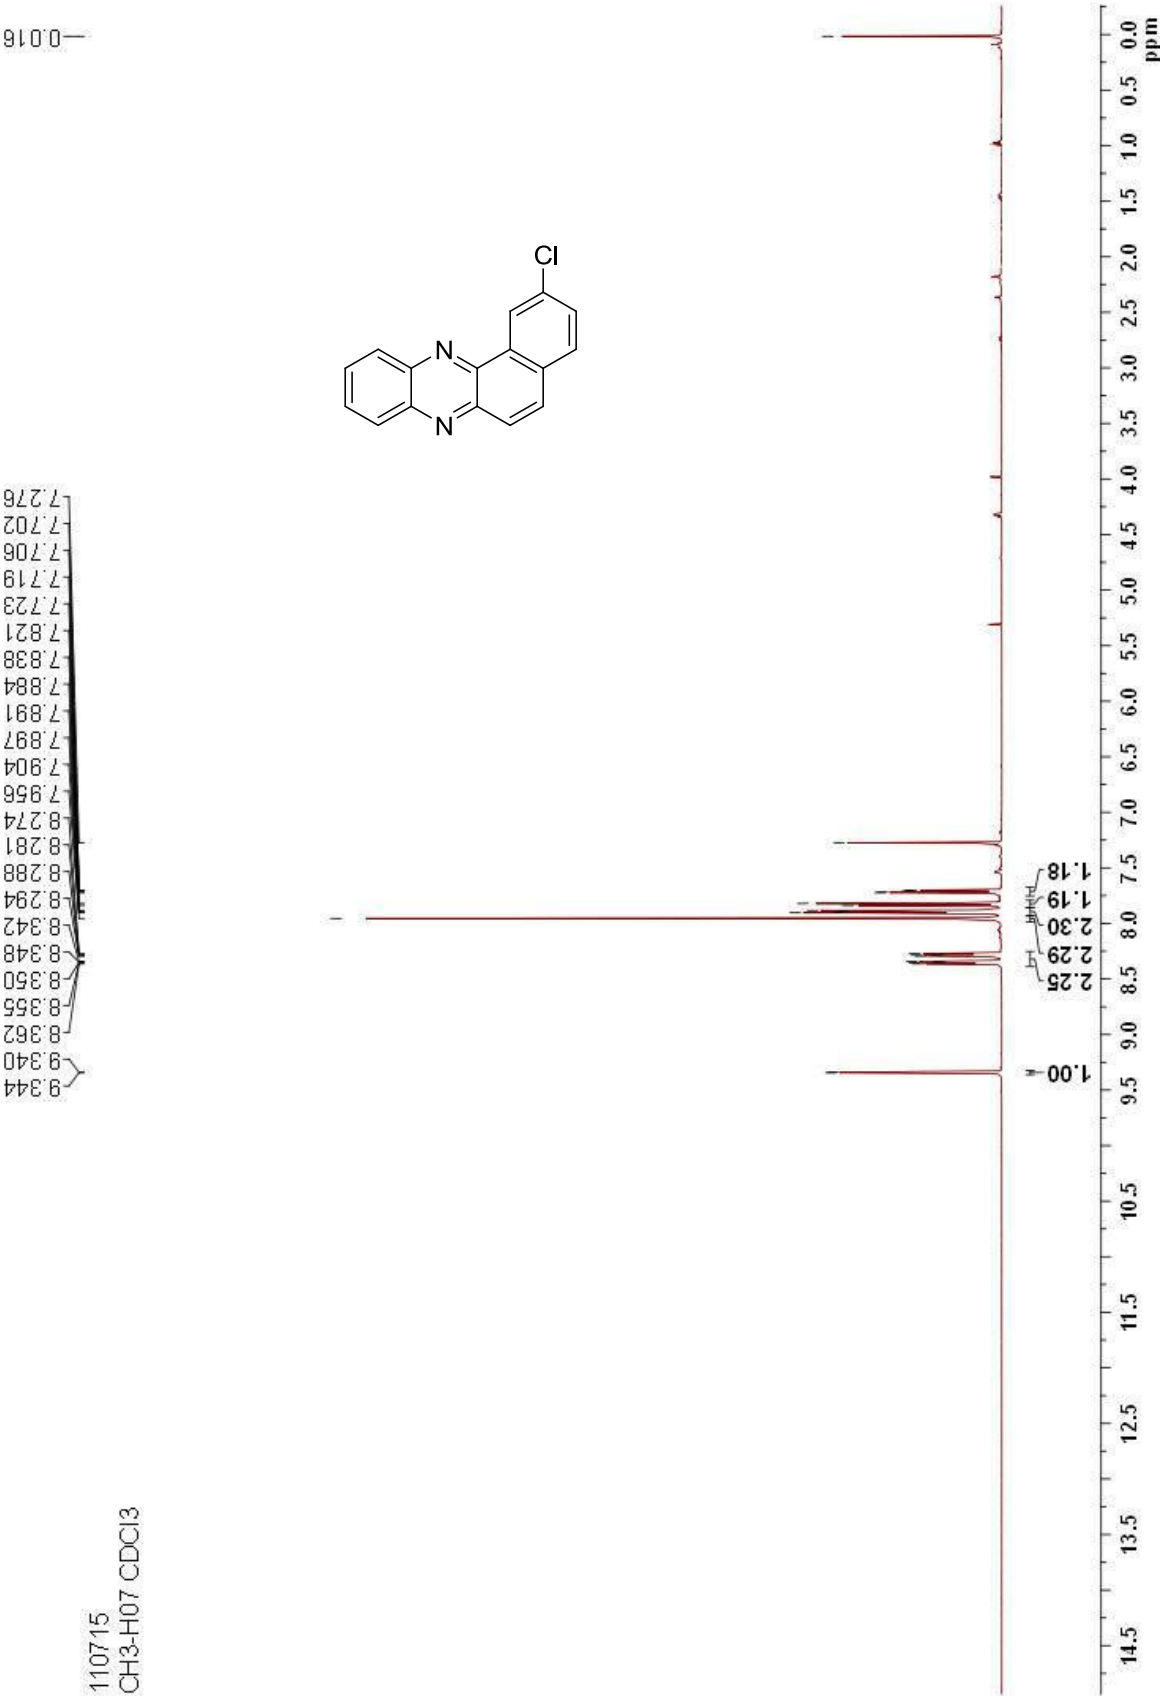

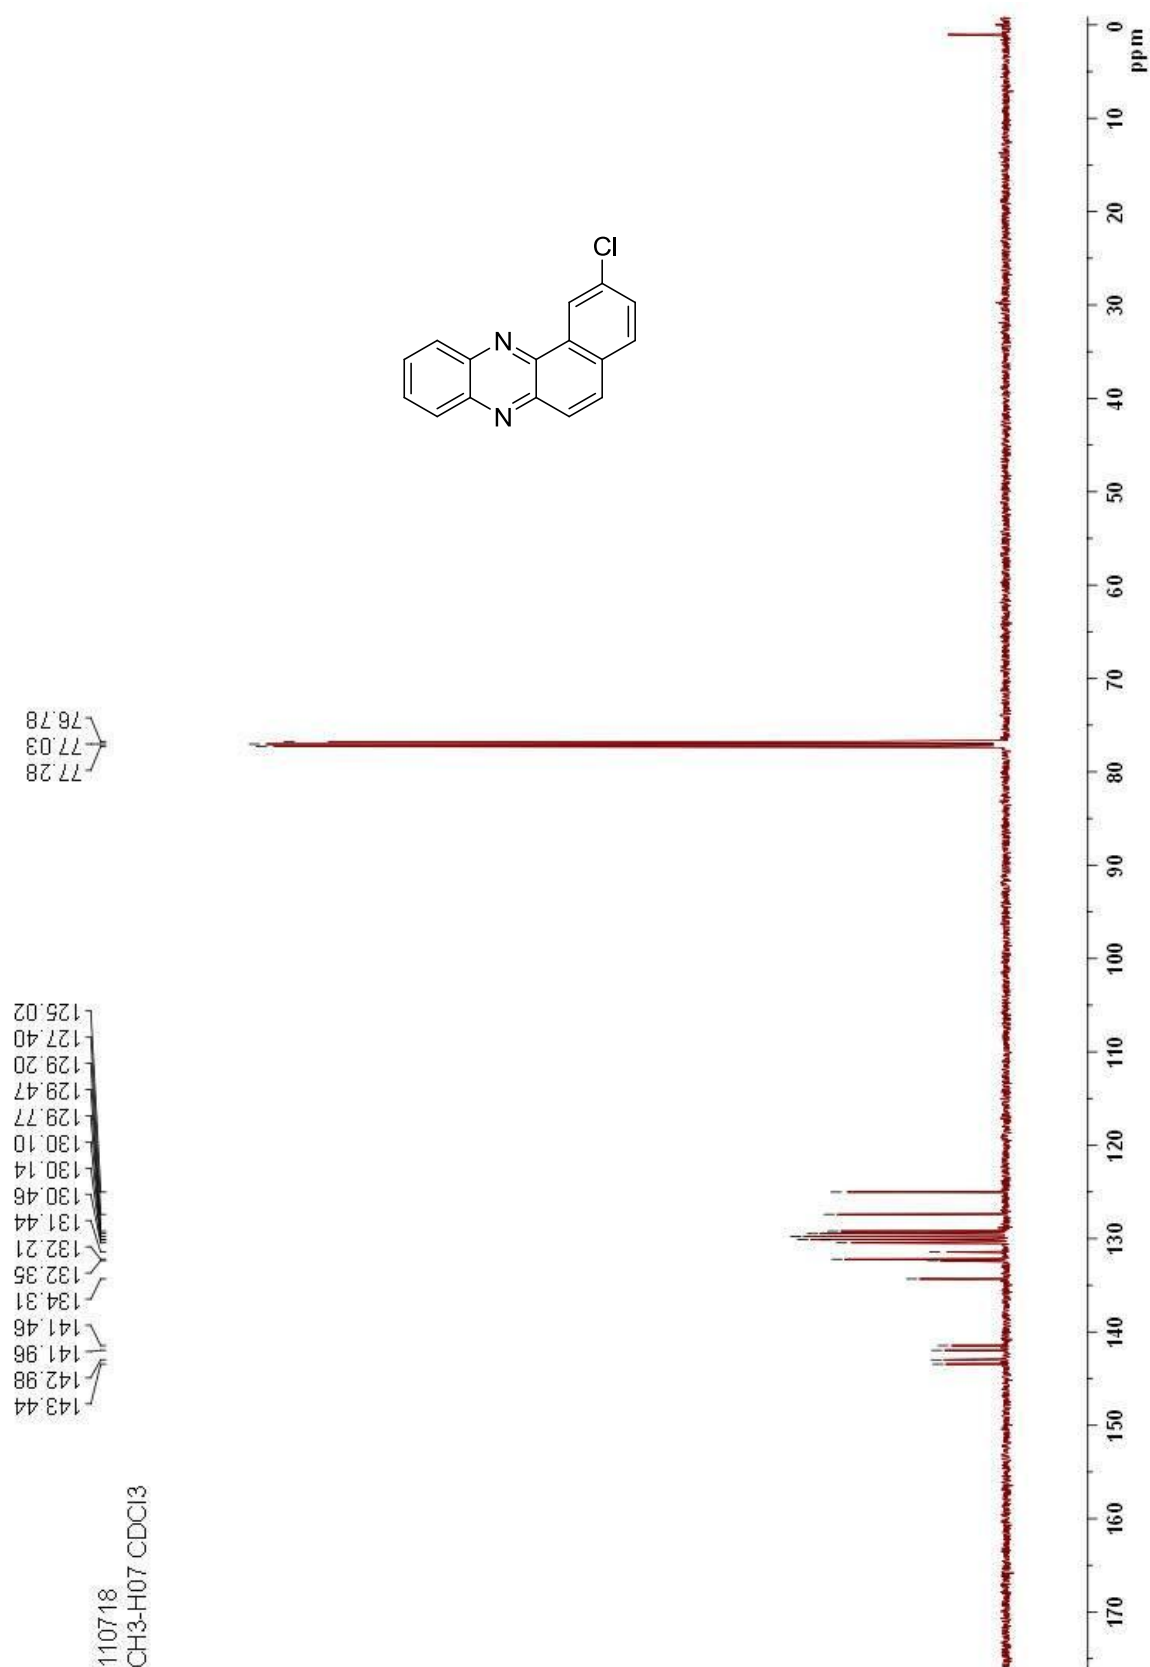

7.276  
7.506  
7.511  
7.523  
7.528  
7.540  
7.545  
7.555  
7.560  
7.573  
7.578  
7.869  
7.878  
7.882  
7.890  
7.897  
7.901  
7.910  
7.942  
7.960  
8.010  
8.029  
8.283  
8.289  
8.291  
8.293  
8.300  
8.303  
8.347  
8.350  
8.356  
8.359  
8.362  
8.367  
9.408  
9.420  
9.426  
9.438

110722  
CH3-H08 CDCl3

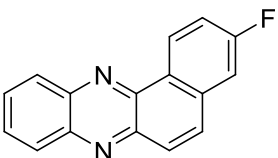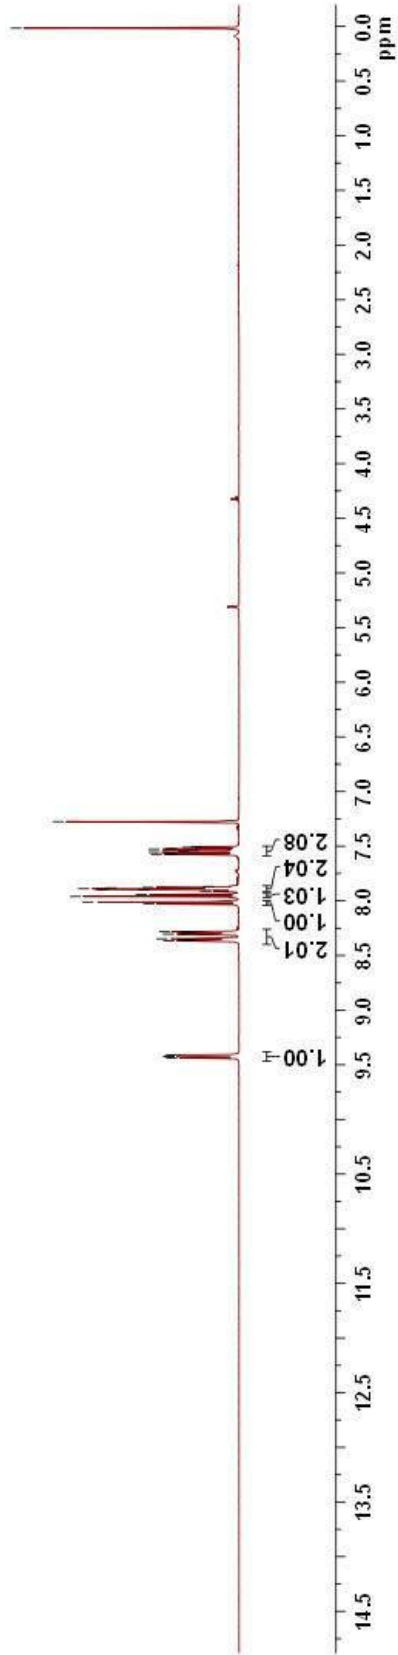



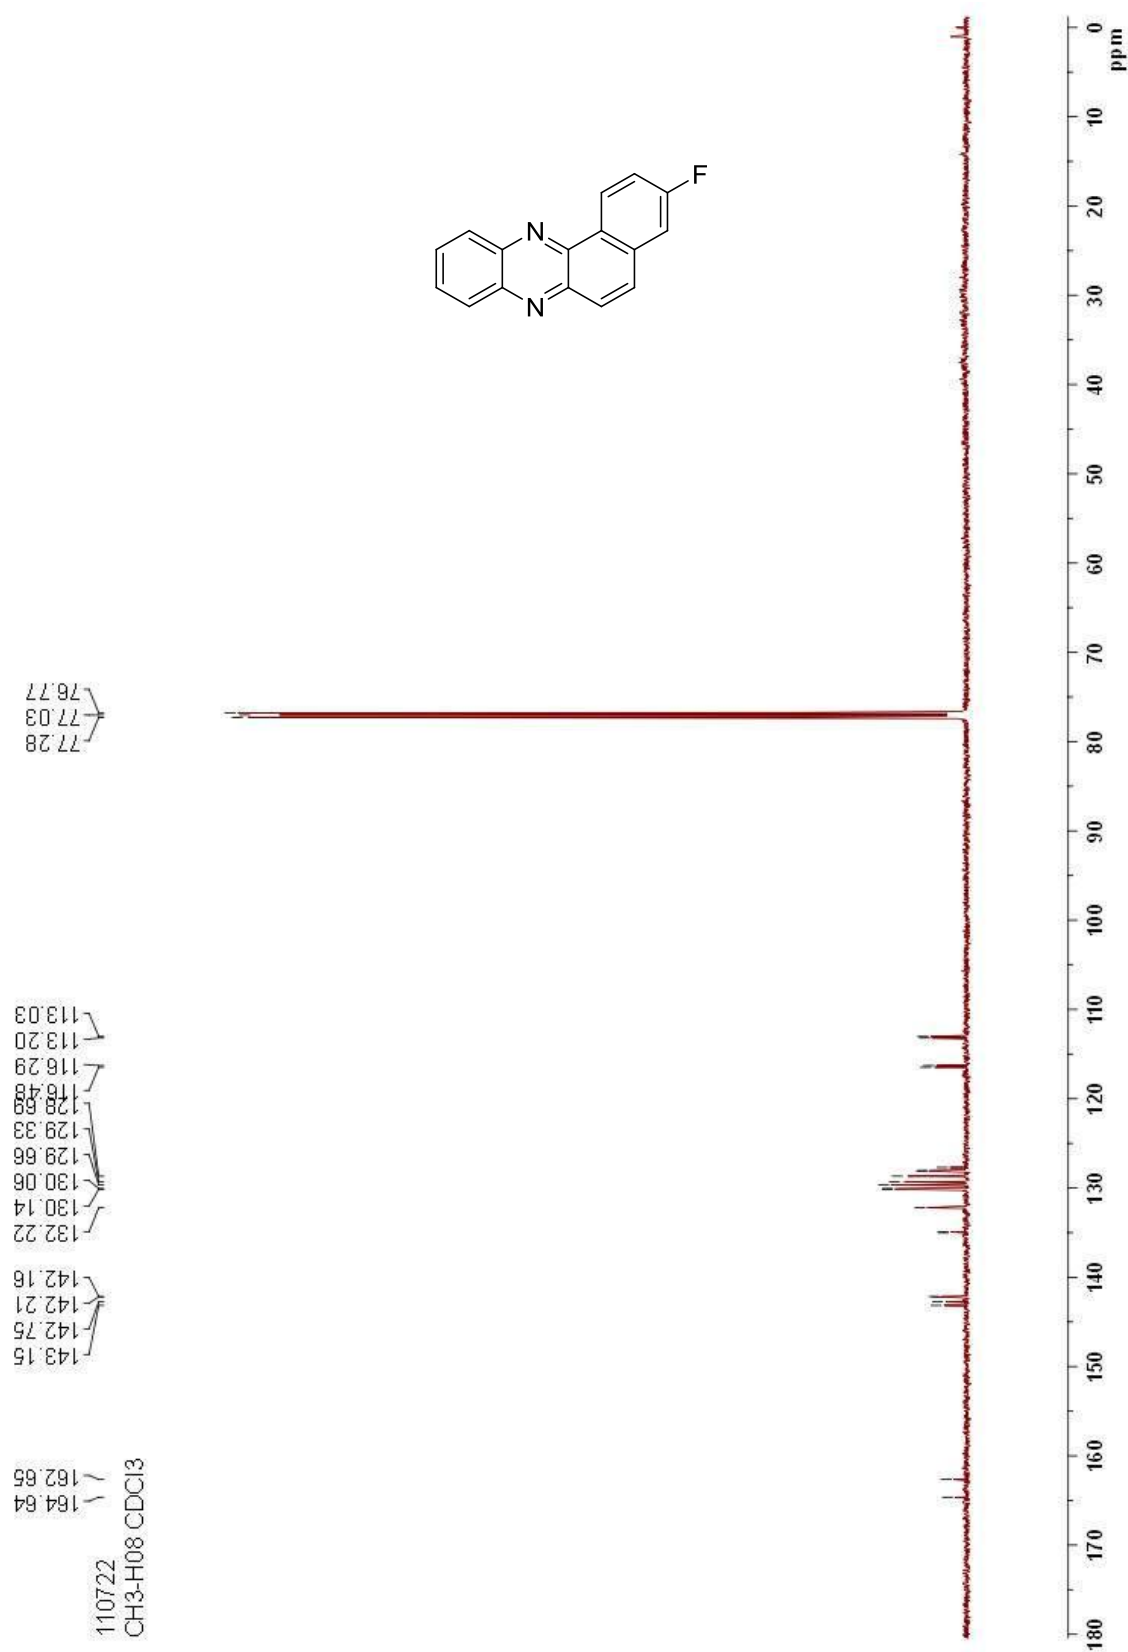

Supplement: c2cc36708d.pdf [file c2cc36708d.pdf]
